# Supplementary material for: The Th1 cell regulatory circuitry is largely conserved between human and mouse
Source: Life Sci Alliance. 2021 Sep 16;4(11):e202101075. doi: 10.26508/lsa.202101075 (PMC8960437; doi:10.26508/lsa.202101075)
Supplement: Supplementary file 2 [file LSA-2021-01075_TableS2.xlsx]

## Sheet: Hs T-bet binding sites
Human.chr	Human.site_start	Human.site_end	Human.Ensembl_gene_id	HGNC_symbol	ortholog	liftOver	T-bet binding at liftover site in Mm	Mouse.chr	Mouse.site_start	Mouse.site_end	Gene type	Mouse.chr.liftOver	Mouse.liftOver.site_start	Mouse.liftOver.site_end
chr1	898419	898607	ENSG00000187634	SAMD11	TRUE	FALSE	no_overlap	NA	NA	NA	Other	NA	NA	NA
chr1	904722	904834	ENSG00000187634	SAMD11	TRUE	FALSE	no_overlap	NA	NA	NA	Other	NA	NA	NA
chr1	959210	959459	ENSG00000188976	NOC2L	TRUE	TRUE	low_confidence	chr4	156235861	156236304	Other	chr4	156235881	156236075
chr1	959210	959459	ENSG00000188976	NOC2L	TRUE	TRUE	low_confidence	chr4	156234767	156234994	Other	chr4	156235881	156236075
chr1	960524	960671	ENSG00000187961	KLHL17	TRUE	TRUE	low_confidence	chr4	156234767	156234994	Other	chr4	156234771	156234896
chr1	966927	967032	ENSG00000187583	PLEKHN1	FALSE	TRUE	low_confidence	chr4	156228839	156229021	Other	chr4	156227950	156228037
chr1	1040768	1040881	ENSG00000188157	AGRN	TRUE	TRUE	no_overlap	NA	NA	NA	Other	chr4	156179392	156179505
chr1	1116117	1116269	ENSG00000131591	C1orf159	TRUE	TRUE	no_overlap	NA	NA	NA	Other	NA	NA	NA
chr1	1116325	1116405	ENSG00000131591	C1orf159	TRUE	TRUE	no_overlap	NA	NA	NA	Other	NA	NA	NA
chr1	1137382	1137561	ENSG00000131591	C1orf159	TRUE	TRUE	no_overlap	NA	NA	NA	Other	NA	NA	NA
chr1	1200961	1201136	ENSG00000186891	TNFRSF18	TRUE	TRUE	low_confidence	chr4	156031869	156032188	Other	chr4	156032030	156032106
chr1	1201481	1201593	ENSG00000186891	TNFRSF18	TRUE	TRUE	low_confidence	chr4	156031869	156032188	Other	NA	NA	NA
chr1	1201481	1201593	ENSG00000186891	TNFRSF18	TRUE	TRUE	low_confidence	chr18	12620422	12620582	Other	NA	NA	NA
chr1	1209034	1209128	ENSG00000186827	TNFRSF4	TRUE	FALSE	no_overlap	NA	NA	NA	Other	NA	NA	NA
chr1	1212893	1213021	ENSG00000186827	TNFRSF4	TRUE	TRUE	low_confidence	chr4	156014553	156014730	Other	chr4	156014974	156015026
chr1	1212893	1213021	ENSG00000186827	TNFRSF4	TRUE	TRUE	low_confidence	chr4	156013682	156014004	Other	chr4	156014974	156015026
chr1	1213580	1213668	ENSG00000186827	TNFRSF4	TRUE	TRUE	low_confidence	chr4	156014553	156014730	Other	chr4	156014345	156014432
chr1	1213580	1213668	ENSG00000186827	TNFRSF4	TRUE	TRUE	low_confidence	chr4	156013682	156014004	Other	chr4	156014345	156014432
chr1	1216799	1216886	ENSG00000078808	SDF4	TRUE	TRUE	high_confidence	chr4	156010579	156010683	Conserved	NA	NA	NA
chr1	1216799	1216886	ENSG00000078808	SDF4	TRUE	TRUE	high_confidence	chr4	156010504	156010701	Conserved	NA	NA	NA
chr1	1217160	1217270	ENSG00000078808	SDF4	TRUE	TRUE	high_confidence	chr4	156010579	156010683	Conserved	chr4	156010296	156010393
chr1	1217160	1217270	ENSG00000078808	SDF4	TRUE	TRUE	high_confidence	chr4	156010504	156010701	Conserved	chr4	156010296	156010393
chr1	1231956	1232049	ENSG00000078808	SDF4	TRUE	TRUE	low_confidence	chr4	155992165	155993277	Conserved	chr4	155993170	155993285
chr1	1273805	1273963	ENSG00000160087	UBE2J2	TRUE	TRUE	high_confidence	chr4	155943684	155943793	Conserved	chr4	155943759	155943880
chr1	1273805	1273963	ENSG00000160087	UBE2J2	TRUE	TRUE	high_confidence	chr4	155943578	155944060	Conserved	chr4	155943759	155943880
chr1	1307912	1308057	ENSG00000131584	ACAP3	TRUE	TRUE	low_confidence	chr4	155892600	155892807	Other	chr4	155892150	155892293
chr1	1307912	1308057	ENSG00000131584	ACAP3	TRUE	TRUE	low_confidence	chr4	155892032	155892254	Other	chr4	155892150	155892293
chr1	1307912	1308057	ENSG00000131584	ACAP3	TRUE	TRUE	low_confidence	chr4	155891701	155891972	Other	chr4	155892150	155892293
chr1	1308354	1308501	ENSG00000169972	PUSL1	TRUE	TRUE	low_confidence	chr4	155892600	155892807	Other	chr4	155891794	155891927
chr1	1308354	1308501	ENSG00000169972	PUSL1	TRUE	TRUE	low_confidence	chr4	155892032	155892254	Other	chr4	155891794	155891927
chr1	1308354	1308501	ENSG00000169972	PUSL1	TRUE	TRUE	low_confidence	chr4	155891701	155891972	Other	chr4	155891794	155891927
chr1	1371302	1371549	ENSG00000175756	AURKAIP1	TRUE	TRUE	low_confidence	chr4	155833883	155834116	Other	chr4	155835136	155835276
chr1	1375179	1375362	ENSG00000175756	AURKAIP1	TRUE	TRUE	low_confidence	chr4	155831457	155831906	Other	chr4	155831517	155831643
chr1	1407255	1407490	ENSG00000242485	MRPL20	TRUE	TRUE	low_confidence	chr4	155803326	155803877	Other	NA	NA	NA
chr1	1471723	1471821	ENSG00000160072	ATAD3B	FALSE	TRUE	low_confidence	chr4	155760897	155761330	Other	chr4	155761060	155761155
chr1	1574527	1574670	ENSG00000160075	SSU72	TRUE	TRUE	low_confidence	chr4	155704876	155705495	Other	chr4	155705280	155705412
chr1	1574870	1575060	ENSG00000160075	SSU72	TRUE	TRUE	low_confidence	chr4	155704876	155705495	Other	chr4	155705029	155705128
chr1	1629748	1629790	ENSG00000197530	MIB2	TRUE	TRUE	no_overlap	NA	NA	NA	Other	chr4	155655015	155655062
chr1	1629845	1630026	ENSG00000197530	MIB2	TRUE	TRUE	no_overlap	NA	NA	NA	Other	NA	NA	NA
chr1	1630356	1630558	ENSG00000197530	MIB2	TRUE	TRUE	no_overlap	NA	NA	NA	Other	chr4	155654731	155654929
chr1	1677773	1677854	ENSG00000189339	SLC35E2B	TRUE	TRUE	no_overlap	NA	NA	NA	Other	NA	NA	NA
chr1	1677940	1678121	ENSG00000189339	SLC35E2B	TRUE	TRUE	no_overlap	NA	NA	NA	Other	NA	NA	NA
chr1	1692467	1692568	ENSG00000189339	SLC35E2B	TRUE	FALSE	no_overlap	NA	NA	NA	Other	NA	NA	NA
chr1	1692735	1692884	ENSG00000189339	SLC35E2B	TRUE	FALSE	no_overlap	NA	NA	NA	Other	NA	NA	NA
chr1	1692996	1693201	ENSG00000189339	SLC35E2B	TRUE	FALSE	no_overlap	NA	NA	NA	Other	NA	NA	NA
chr1	1693403	1693587	ENSG00000189339	SLC35E2B	TRUE	FALSE	no_overlap	NA	NA	NA	Other	NA	NA	NA
chr1	1724316	1724427	ENSG00000008128	CDK11A	FALSE	TRUE	low_confidence	chr4	155624424	155625093	Other	chr4	155624832	155624874
chr1	1728682	1728801	ENSG00000215790	SLC35E2A	FALSE	TRUE	no_overlap	NA	NA	NA	Other	chr4	155620614	155620742
chr1	1746269	1746496	ENSG00000215790	SLC35E2A	FALSE	FALSE	no_overlap	NA	NA	NA	Other	NA	NA	NA
chr1	1780497	1780687	ENSG00000008130	NADK	TRUE	TRUE	no_overlap	NA	NA	NA	Other	chr4	155561827	155561984
chr1	1891066	1891186	ENSG00000078369	GNB1	TRUE	TRUE	low_confidence	chr4	155492213	155492397	Other	chr4	155491287	155491383
chr1	1891066	1891186	ENSG00000078369	GNB1	TRUE	TRUE	low_confidence	chr4	155491272	155491436	Other	chr4	155491287	155491383
chr1	2148821	2148885	ENSG00000067606	PRKCZ	TRUE	TRUE	no_overlap	NA	NA	NA	Other	chr4	155290542	155290596
chr1	2195038	2195129	ENSG00000162585	FAAP20	FALSE	TRUE	low_confidence	chr4	155249879	155250278	Other	chr4	155249637	155249717
chr1	2195038	2195129	ENSG00000162585	FAAP20	FALSE	TRUE	low_confidence	chr4	155249331	155249533	Other	chr4	155249637	155249717
chr1	2199186	2199353	ENSG00000162585	FAAP20	FALSE	TRUE	high_confidence	chr4	155245954	155246189	Other	chr4	155246372	155246516
chr1	2199186	2199353	ENSG00000162585	FAAP20	FALSE	TRUE	high_confidence	chr4	155245909	155246217	Other	chr4	155246372	155246516
chr1	2227502	2227732	ENSG00000157933	SKI	TRUE	TRUE	high_confidence	chr4	155223447	155223506	Conserved	chr4	155223388	155223662
chr1	2227502	2227732	ENSG00000157933	SKI	TRUE	TRUE	high_confidence	chr4	155223014	155223617	Conserved	chr4	155223388	155223662
chr1	2227988	2228106	ENSG00000157933	SKI	TRUE	TRUE	high_confidence	chr4	155223447	155223506	Conserved	chr4	155223006	155223123
chr1	2227988	2228106	ENSG00000157933	SKI	TRUE	TRUE	high_confidence	chr4	155223014	155223617	Conserved	chr4	155223006	155223123
chr1	2234400	2234685	ENSG00000157933	SKI	TRUE	TRUE	high_confidence	chr4	155217469	155217575	Conserved	chr4	155217339	155217679
chr1	2234400	2234685	ENSG00000157933	SKI	TRUE	TRUE	high_confidence	chr4	155217461	155217655	Conserved	chr4	155217339	155217679
chr1	2234889	2235047	ENSG00000157933	SKI	TRUE	TRUE	high_confidence	chr4	155217469	155217575	Conserved	NA	NA	NA
chr1	2234889	2235047	ENSG00000157933	SKI	TRUE	TRUE	high_confidence	chr4	155217461	155217655	Conserved	NA	NA	NA
chr1	2234889	2235047	ENSG00000157933	SKI	TRUE	TRUE	high_confidence	chr4	155216159	155216482	Conserved	NA	NA	NA
chr1	2255930	2256013	ENSG00000157933	SKI	TRUE	TRUE	low_confidence	chr4	155200704	155201319	Conserved	chr4	155200948	155200997
chr1	2290698	2291013	ENSG00000157933	SKI	TRUE	TRUE	no_overlap	NA	NA	NA	Conserved	chr4	155173670	155173976
chr1	2291267	2291423	ENSG00000157933	SKI	TRUE	TRUE	no_overlap	NA	NA	NA	Conserved	chr4	155173302	155173407
chr1	2300427	2300691	ENSG00000157933	SKI	TRUE	TRUE	high_confidence	chr4	155162487	155162684	Conserved	chr4	155163084	155163196
chr1	2300427	2300691	ENSG00000157933	SKI	TRUE	TRUE	high_confidence	chr4	155162442	155162713	Conserved	chr4	155163084	155163196
chr1	2301005	2301336	ENSG00000157933	SKI	TRUE	TRUE	high_confidence	chr4	155162487	155162684	Conserved	chr4	155162373	155162679
chr1	2301005	2301336	ENSG00000157933	SKI	TRUE	TRUE	high_confidence	chr4	155162442	155162713	Conserved	chr4	155162373	155162679
chr1	2391718	2391829	ENSG00000157916	RER1	TRUE	TRUE	low_confidence	chr4	155086201	155086758	Other	chr4	155086329	155086433
chr1	2415825	2416013	ENSG00000157911	PEX10	TRUE	TRUE	no_overlap	NA	NA	NA	Other	NA	NA	NA
chr1	2524057	2524154	ENSG00000157881	PANK4	TRUE	TRUE	no_overlap	NA	NA	NA	Other	NA	NA	NA
chr1	2546346	2546482	ENSG00000157873	TNFRSF14	TRUE	TRUE	no_overlap	NA	NA	NA	Conserved	chr4	154946397	154946516
chr1	2546950	2547187	ENSG00000157873	TNFRSF14	TRUE	TRUE	low_confidence	chr4	154944039	154944572	Conserved	chr4	154945756	154946002
chr1	2548088	2548194	ENSG00000157873	TNFRSF14	TRUE	TRUE	high_confidence	chr4	154944273	154944460	Conserved	chr4	154944503	154944582
chr1	2548088	2548194	ENSG00000157873	TNFRSF14	TRUE	TRUE	high_confidence	chr4	154944039	154944572	Conserved	chr4	154944503	154944582
chr1	2548816	2549021	ENSG00000157873	TNFRSF14	TRUE	TRUE	high_confidence	chr4	154944273	154944460	Conserved	NA	NA	NA
chr1	2548816	2549021	ENSG00000157873	TNFRSF14	TRUE	TRUE	high_confidence	chr4	154944039	154944572	Conserved	NA	NA	NA
chr1	2556985	2557129	ENSG00000157873	TNFRSF14	TRUE	TRUE	low_confidence	chr4	154928038	154928359	Conserved	chr4	154927618	154927758
chr1	2578338	2578437	ENSG00000157870	PRXL2B	TRUE	FALSE	no_overlap	NA	NA	NA	Other	NA	NA	NA
chr1	3372417	3372516	ENSG00000142611	PRDM16	TRUE	TRUE	high_confidence	chr4	154376329	154376530	Conserved	chr4	154376340	154376432
chr1	3372417	3372516	ENSG00000142611	PRDM16	TRUE	TRUE	high_confidence	chr4	154376300	154376550	Conserved	chr4	154376340	154376432
chr1	3747297	3747410	ENSG00000162592	CCDC27	TRUE	FALSE	no_overlap	NA	NA	NA	Other	NA	NA	NA
chr1	3796487	3796656	ENSG00000130764	LRRC47	TRUE	TRUE	high_confidence	chr4	154011661	154011788	Conserved	chr4	154011722	154011810
chr1	3796487	3796656	ENSG00000130764	LRRC47	TRUE	TRUE	high_confidence	chr4	154011607	154011808	Conserved	chr4	154011722	154011810
chr1	3891160	3891311	ENSG00000198912	C1orf174	TRUE	TRUE	no_overlap	NA	NA	NA	Other	NA	NA	NA
chr1	5329177	5329272	ENSG00000131697	NPHP4	TRUE	TRUE	no_overlap	NA	NA	NA	Other	chr4	152923672	152923764
chr1	5370437	5370521	ENSG00000131697	NPHP4	TRUE	TRUE	no_overlap	NA	NA	NA	Other	NA	NA	NA
chr1	5389094	5389296	ENSG00000131697	NPHP4	TRUE	TRUE	no_overlap	NA	NA	NA	Other	chr4	152863558	152863764
chr1	5423311	5423414	ENSG00000131697	NPHP4	TRUE	TRUE	no_overlap	NA	NA	NA	Other	chr4	152836249	152836353
chr1	5667258	5667372	ENSG00000131697	NPHP4	TRUE	FALSE	no_overlap	NA	NA	NA	Other	NA	NA	NA
chr1	5902038	5902135	ENSG00000131697	NPHP4	TRUE	TRUE	no_overlap	NA	NA	NA	Other	chr4	152541375	152541452
chr1	5992017	5992144	ENSG00000069424	KCNAB2	TRUE	TRUE	low_confidence	chr4	152477346	152478219	Conserved	chr4	152478006	152478132
chr1	5992632	5992763	ENSG00000069424	KCNAB2	TRUE	TRUE	low_confidence	chr4	152477346	152478219	Conserved	chr4	152477427	152477558
chr1	5993679	5993802	ENSG00000069424	KCNAB2	TRUE	TRUE	low_confidence	chr4	152477346	152478219	Conserved	chr4	152476450	152476597
chr1	6026203	6026461	ENSG00000069424	KCNAB2	TRUE	TRUE	high_confidence	chr4	152448719	152448841	Conserved	chr4	152448662	152448886
chr1	6026203	6026461	ENSG00000069424	KCNAB2	TRUE	TRUE	high_confidence	chr4	152448375	152448948	Conserved	chr4	152448662	152448886
chr1	6027093	6027278	ENSG00000069424	KCNAB2	TRUE	TRUE	high_confidence	chr4	152448719	152448841	Conserved	chr4	152448070	152448072
chr1	6027093	6027278	ENSG00000069424	KCNAB2	TRUE	TRUE	high_confidence	chr4	152446360	152446515	Conserved	chr4	152448070	152448072
chr1	6027093	6027278	ENSG00000069424	KCNAB2	TRUE	TRUE	high_confidence	chr4	152448375	152448948	Conserved	chr4	152448070	152448072
chr1	6027093	6027278	ENSG00000069424	KCNAB2	TRUE	TRUE	high_confidence	chr4	152446278	152446585	Conserved	chr4	152448070	152448072
chr1	6028156	6028375	ENSG00000069424	KCNAB2	TRUE	TRUE	high_confidence	chr4	152446360	152446515	Conserved	chr4	152446336	152446517
chr1	6028156	6028375	ENSG00000069424	KCNAB2	TRUE	TRUE	high_confidence	chr4	152446278	152446585	Conserved	chr4	152446336	152446517
chr1	6028483	6028632	ENSG00000069424	KCNAB2	TRUE	TRUE	high_confidence	chr4	152446360	152446515	Conserved	chr4	152446093	152446232
chr1	6028483	6028632	ENSG00000069424	KCNAB2	TRUE	TRUE	high_confidence	chr4	152446278	152446585	Conserved	chr4	152446093	152446232
chr1	6199591	6199726	ENSG00000116251	RPL22	FALSE	TRUE	low_confidence	chr4	152325403	152325983	Other	chr4	152325730	152325866
chr1	6348735	6348833	ENSG00000097021	ACOT7	TRUE	TRUE	low_confidence	chr4	152212678	152212846	Conserved	NA	NA	NA
chr1	6365171	6365360	ENSG00000097021	ACOT7	TRUE	FALSE	no_overlap	NA	NA	NA	Conserved	NA	NA	NA
chr1	6393339	6393432	ENSG00000097021	ACOT7	TRUE	TRUE	high_confidence	chr4	152179016	152179271	Conserved	chr4	152178165	152178261
chr1	6393339	6393432	ENSG00000097021	ACOT7	TRUE	TRUE	high_confidence	chr4	152178946	152179323	Conserved	chr4	152178165	152178261
chr1	6393339	6393432	ENSG00000097021	ACOT7	TRUE	TRUE	high_confidence	chr4	152177876	152178278	Conserved	chr4	152178165	152178261
chr1	6393745	6393855	ENSG00000097021	ACOT7	TRUE	TRUE	low_confidence	chr4	152177876	152178278	Conserved	chr4	152177737	152177843
chr1	6404799	6404886	ENSG00000069812	HES2	TRUE	TRUE	low_confidence	chr4	152173157	152173333	Other	chr4	152173196	152173259
chr1	6554503	6554644	ENSG00000162408	NOL9	TRUE	TRUE	low_confidence	chr4	152039153	152039721	Other	chr4	152039229	152039354
chr1	6613405	6613696	ENSG00000116273	PHF13	TRUE	TRUE	high_confidence	chr4	151996248	151996424	Conserved	chr4	151996254	151996515
chr1	6613405	6613696	ENSG00000116273	PHF13	TRUE	TRUE	high_confidence	chr4	151996200	151996847	Conserved	chr4	151996254	151996515
chr1	6625083	6625158	ENSG00000041988	THAP3	TRUE	TRUE	low_confidence	chr4	151988826	151989058	Other	chr4	151989010	151989072
chr1	6625083	6625158	ENSG00000041988	THAP3	TRUE	TRUE	low_confidence	chr4	151988603	151988763	Other	chr4	151989010	151989072
chr1	6625083	6625158	ENSG00000041988	THAP3	TRUE	TRUE	low_confidence	chr4	151988407	151988516	Other	chr4	151989010	151989072
chr1	6701757	6701990	ENSG00000007923	DNAJC11	TRUE	TRUE	high_confidence	chr4	151933525	151933786	Conserved	chr4	151933577	151933796
chr1	6701757	6701990	ENSG00000007923	DNAJC11	TRUE	TRUE	high_confidence	chr4	151933448	151933930	Conserved	chr4	151933577	151933796
chr1	6784696	6784815	ENSG00000171735	CAMTA1	TRUE	TRUE	low_confidence	chr4	151862377	151862668	Other	chr4	151862388	151862528
chr1	6784696	6784815	ENSG00000171735	CAMTA1	TRUE	TRUE	low_confidence	chr4	151861582	151862242	Other	chr4	151862388	151862528
chr1	7953939	7954316	ENSG00000116288	PARK7	TRUE	TRUE	high_confidence	chr4	150914402	150914617	Conserved	chr4	150914479	150914719
chr1	7953939	7954316	ENSG00000116288	PARK7	TRUE	TRUE	high_confidence	chr4	150914186	150914729	Conserved	chr4	150914479	150914719
chr1	7961407	7961710	ENSG00000116288	PARK7	TRUE	TRUE	high_confidence	chr4	150909791	150909941	Conserved	chr4	150909853	150910048
chr1	7961407	7961710	ENSG00000116288	PARK7	TRUE	TRUE	high_confidence	chr4	150909596	150910082	Conserved	chr4	150909853	150910048
chr1	7961780	7961820	ENSG00000116288	PARK7	TRUE	TRUE	high_confidence	chr4	150909791	150909941	Conserved	chr4	150909760	150909795
chr1	7961780	7961820	ENSG00000116288	PARK7	TRUE	TRUE	high_confidence	chr4	150909596	150910082	Conserved	chr4	150909760	150909795
chr1	8152717	8152841	ENSG00000116285	ERRFI1	TRUE	TRUE	no_overlap	NA	NA	NA	Other	NA	NA	NA
chr1	8153207	8153347	ENSG00000116285	ERRFI1	TRUE	TRUE	no_overlap	NA	NA	NA	Other	NA	NA	NA
chr1	8169860	8169991	ENSG00000116285	ERRFI1	TRUE	TRUE	low_confidence	chr4	150746224	150746375	Other	chr4	150746204	150746339
chr1	8182556	8182646	ENSG00000162426	SLC45A1	TRUE	FALSE	no_overlap	NA	NA	NA	Other	NA	NA	NA
chr1	8427608	8427873	ENSG00000142599	RERE	TRUE	TRUE	high_confidence	chr4	150566219	150566431	Conserved	chr4	150566162	150566405
chr1	8427608	8427873	ENSG00000142599	RERE	TRUE	TRUE	high_confidence	chr4	150566107	150566493	Conserved	chr4	150566162	150566405
chr1	8473729	8473814	ENSG00000142599	RERE	TRUE	TRUE	no_overlap	NA	NA	NA	Conserved	chr4	150527200	150527291
chr1	8701321	8701459	ENSG00000142599	RERE	TRUE	TRUE	no_overlap	NA	NA	NA	Conserved	chr4	150373720	150373848
chr1	8703416	8703508	ENSG00000142599	RERE	TRUE	TRUE	low_confidence	chr4	150371747	150371904	Conserved	chr4	150371806	150371890
chr1	8829671	8829770	ENSG00000142599	RERE	TRUE	TRUE	no_overlap	NA	NA	NA	Conserved	chr4	150267002	150267089
chr1	8873668	8873846	ENSG00000074800	ENO1	FALSE	TRUE	no_overlap	NA	NA	NA	Other	NA	NA	NA
chr1	8876732	8876932	ENSG00000074800	ENO1	FALSE	TRUE	no_overlap	NA	NA	NA	Other	NA	NA	NA
chr1	8878630	8878910	ENSG00000074800	ENO1	FALSE	TRUE	low_confidence	chr4	150237019	150237332	Other	chr4	150237028	150237295
chr1	8878630	8878910	ENSG00000074800	ENO1	FALSE	TRUE	low_confidence	chr4	150236577	150236887	Other	chr4	150237028	150237295
chr1	8900037	8900152	ENSG00000074800	ENO1	FALSE	FALSE	no_overlap	NA	NA	NA	Other	NA	NA	NA
chr1	8920852	8920977	ENSG00000131686	CA6	TRUE	FALSE	no_overlap	NA	NA	NA	Other	NA	NA	NA
chr1	9005245	9005329	ENSG00000197241	SLC2A7	TRUE	TRUE	no_overlap	NA	NA	NA	Other	chr4	150165956	150166050
chr1	9239786	9239935	ENSG00000049239	H6PD	TRUE	TRUE	low_confidence	chr4	150001228	150001370	Other	chr4	150002460	150002582
chr1	9275614	9275766	ENSG00000049239	H6PD	TRUE	FALSE	no_overlap	NA	NA	NA	Other	NA	NA	NA
chr1	9284206	9284397	ENSG00000171621	SPSB1	TRUE	FALSE	no_overlap	NA	NA	NA	Conserved	NA	NA	NA
chr1	9292865	9292968	ENSG00000171621	SPSB1	TRUE	TRUE	low_confidence	chr4	149954921	149955396	Conserved	chr4	149954949	149955045
chr1	9292865	9292968	ENSG00000171621	SPSB1	TRUE	TRUE	low_confidence	chr4	149954003	149954112	Conserved	chr4	149954949	149955045
chr1	9426354	9426625	ENSG00000171621	SPSB1	TRUE	TRUE	high_confidence	chr4	149856472	149856734	Conserved	chr4	149856512	149856758
chr1	9426354	9426625	ENSG00000171621	SPSB1	TRUE	TRUE	high_confidence	chr4	149856450	149856831	Conserved	chr4	149856512	149856758
chr1	9539379	9539488	ENSG00000171612	SLC25A33	TRUE	TRUE	low_confidence	chr4	149774175	149774397	Other	chr4	149774225	149774321
chr1	9627066	9627378	ENSG00000188807	TMEM201	TRUE	FALSE	no_overlap	NA	NA	NA	Other	NA	NA	NA
chr1	9629149	9629404	ENSG00000188807	TMEM201	TRUE	TRUE	no_overlap	NA	NA	NA	Other	NA	NA	NA
chr1	9629709	9630064	ENSG00000188807	TMEM201	TRUE	TRUE	no_overlap	NA	NA	NA	Other	chr4	149713699	149714019
chr1	9651553	9651740	ENSG00000171608	PIK3CD	TRUE	TRUE	low_confidence	chr4	149698325	149698680	Conserved	chr4	149698597	149698768
chr1	9651553	9651740	ENSG00000171608	PIK3CD	TRUE	TRUE	low_confidence	chr4	149697919	149698091	Conserved	chr4	149698597	149698768
chr1	9652410	9652723	ENSG00000171608	PIK3CD	TRUE	TRUE	low_confidence	chr4	149698325	149698680	Conserved	chr4	149697762	149698084
chr1	9652410	9652723	ENSG00000171608	PIK3CD	TRUE	TRUE	low_confidence	chr4	149697919	149698091	Conserved	chr4	149697762	149698084
chr1	9687648	9687765	ENSG00000171608	PIK3CD	TRUE	TRUE	no_overlap	NA	NA	NA	Conserved	NA	NA	NA
chr1	9689315	9689445	ENSG00000171608	PIK3CD	TRUE	TRUE	no_overlap	NA	NA	NA	Conserved	chr4	149676204	149676309
chr1	9704853	9704942	ENSG00000171608	PIK3CD	TRUE	TRUE	low_confidence	chr4	149665088	149665308	Conserved	chr4	149665187	149665277
chr1	9715630	9715768	ENSG00000171608	PIK3CD	TRUE	TRUE	no_overlap	NA	NA	NA	Conserved	chr4	149660003	149660141
chr1	9716996	9717145	ENSG00000171608	PIK3CD	TRUE	TRUE	high_confidence	chr4	149658036	149658391	Conserved	chr4	149658682	149658824
chr1	9716996	9717145	ENSG00000171608	PIK3CD	TRUE	TRUE	high_confidence	chr4	149657886	149658408	Conserved	chr4	149658682	149658824
chr1	9717610	9717967	ENSG00000171608	PIK3CD	TRUE	TRUE	high_confidence	chr4	149658036	149658391	Conserved	chr4	149658054	149658398
chr1	9717610	9717967	ENSG00000171608	PIK3CD	TRUE	TRUE	high_confidence	chr4	149657886	149658408	Conserved	chr4	149658054	149658398
chr1	9787838	9787939	ENSG00000171603	CLSTN1	TRUE	FALSE	no_overlap	NA	NA	NA	Other	NA	NA	NA
chr1	9943291	9943529	ENSG00000173614	NMNAT1	TRUE	TRUE	low_confidence	chr4	149485817	149485956	Other	chr4	149485095	149485327
chr1	9943291	9943529	ENSG00000173614	NMNAT1	TRUE	TRUE	low_confidence	chr4	149485062	149485479	Other	chr4	149485095	149485327
chr1	10032668	10032758	ENSG00000130939	UBE4B	TRUE	TRUE	low_confidence	chr4	149426543	149426955	Other	chr4	149426837	149426894
chr1	10032668	10032758	ENSG00000130939	UBE4B	TRUE	TRUE	low_confidence	chr4	149426124	149426305	Other	chr4	149426837	149426894
chr1	10210304	10210418	ENSG00000054523	KIF1B	TRUE	TRUE	high_confidence	chr4	149307764	149307867	Conserved	chr4	149307846	149307975
chr1	10210304	10210418	ENSG00000054523	KIF1B	TRUE	TRUE	high_confidence	chr4	149308202	149308382	Conserved	chr4	149307846	149307975
chr1	10210304	10210418	ENSG00000054523	KIF1B	TRUE	TRUE	high_confidence	chr4	149307655	149308003	Conserved	chr4	149307846	149307975
chr1	10210304	10210418	ENSG00000054523	KIF1B	TRUE	TRUE	high_confidence	chr4	149307493	149307615	Conserved	chr4	149307846	149307975
chr1	10307968	10308155	ENSG00000054523	KIF1B	TRUE	TRUE	low_confidence	chr4	149234010	149234138	Conserved	chr4	149234117	149234296
chr1	10430355	10430476	ENSG00000175279	CENPS	TRUE	TRUE	low_confidence	chr4	149137209	149137794	Other	chr4	149137540	149137664
chr1	10472486	10472660	ENSG00000160049	DFFA	TRUE	TRUE	low_confidence	chr4	149103923	149104262	Other	chr4	149104053	149104225
chr1	10474864	10474965	ENSG00000142655	PEX14	TRUE	TRUE	high_confidence	chr4	149099835	149099930	Conserved	chr4	149099809	149099910
chr1	10474864	10474965	ENSG00000142655	PEX14	TRUE	TRUE	high_confidence	chr4	149099713	149099984	Conserved	chr4	149099809	149099910
chr1	10510977	10511129	ENSG00000142655	PEX14	TRUE	TRUE	low_confidence	chr4	149063908	149064017	Conserved	chr4	149064250	149064400
chr1	10692534	10692631	ENSG00000130940	CASZ1	FALSE	TRUE	low_confidence	chr4	148901873	148902128	Other	chr4	148903007	148903107
chr1	10961140	10961211	ENSG00000175262	C1orf127	TRUE	TRUE	low_confidence	chr4	148662175	148662398	Other	chr4	148662281	148662338
chr1	11012555	11012662	ENSG00000277726	AL109811.4	FALSE	TRUE	low_confidence	chr4	148626539	148627151	Other	chr4	148626762	148626868
chr1	11060957	11061112	ENSG00000116649	SRM	TRUE	TRUE	low_confidence	chr4	148591183	148591593	Other	chr4	148590727	148590866
chr1	11063013	11063253	ENSG00000116649	SRM	TRUE	FALSE	no_overlap	NA	NA	NA	Other	NA	NA	NA
chr1	11262755	11262866	ENSG00000198793	MTOR	TRUE	TRUE	low_confidence	chr4	148448237	148448496	Other	chr4	148448270	148448379
chr1	11650388	11650645	ENSG00000116661	FBXO2	TRUE	TRUE	low_confidence	chr4	148164031	148164380	Other	chr4	148164276	148164527
chr1	11664110	11664224	ENSG00000116663	FBXO6	TRUE	TRUE	low_confidence	chr4	148151851	148152210	Other	chr4	148152021	148152123
chr1	11664628	11664813	ENSG00000116663	FBXO6	TRUE	TRUE	low_confidence	chr4	148151851	148152210	Other	NA	NA	NA
chr1	11681107	11681255	ENSG00000116670	MAD2L2	TRUE	TRUE	low_confidence	chr4	148139969	148140865	Other	chr4	148140443	148140565
chr1	11719506	11719597	ENSG00000162490	DRAXIN	TRUE	TRUE	low_confidence	chr4	148102148	148102339	Other	chr4	148102569	148102641
chr1	11730462	11730602	ENSG00000162490	DRAXIN	TRUE	TRUE	no_overlap	NA	NA	NA	Other	NA	NA	NA
chr1	11740871	11741154	ENSG00000177674	AGTRAP	TRUE	TRUE	no_overlap	NA	NA	NA	Other	NA	NA	NA
chr1	11749156	11749401	ENSG00000177674	AGTRAP	TRUE	TRUE	no_overlap	NA	NA	NA	Other	chr4	148081215	148081353
chr1	11803532	11803663	ENSG00000177000	MTHFR	TRUE	TRUE	low_confidence	chr4	148041060	148041178	Other	chr4	148041073	148041194
chr1	11805924	11806040	ENSG00000177000	MTHFR	TRUE	TRUE	low_confidence	chr4	148038519	148039276	Other	chr4	148038994	148039114
chr1	11807323	11807424	ENSG00000011021	CLCN6	TRUE	TRUE	low_confidence	chr4	148038519	148039276	Other	chr4	148037738	148037809
chr1	11905724	11905850	ENSG00000116685	KIAA2013	TRUE	FALSE	no_overlap	NA	NA	NA	Other	NA	NA	NA
chr1	11907819	11907929	ENSG00000116685	KIAA2013	TRUE	FALSE	no_overlap	NA	NA	NA	Other	NA	NA	NA
chr1	11908102	11908348	ENSG00000116685	KIAA2013	TRUE	FALSE	no_overlap	NA	NA	NA	Other	NA	NA	NA
chr1	11909873	11909915	ENSG00000116685	KIAA2013	TRUE	FALSE	no_overlap	NA	NA	NA	Other	NA	NA	NA
chr1	11926361	11926519	ENSG00000116685	KIAA2013	TRUE	TRUE	low_confidence	chr4	147940825	147941030	Other	chr4	147940797	147940941
chr1	11973092	11973182	ENSG00000083444	PLOD1	TRUE	TRUE	no_overlap	NA	NA	NA	Other	chr4	147913050	147913130
chr1	11980377	11980521	ENSG00000116688	MFN2	TRUE	TRUE	low_confidence	chr4	147904440	147905005	Other	chr4	147904622	147904759
chr1	12047293	12047576	ENSG00000116691	MIIP	TRUE	TRUE	high_confidence	chr4	145342183	145342521	Other	chr4	145342163	145342445
chr1	12047293	12047576	ENSG00000116691	MIIP	TRUE	TRUE	high_confidence	chr4	145341865	145342110	Other	chr4	145342163	145342445
chr1	12047293	12047576	ENSG00000116691	MIIP	TRUE	TRUE	high_confidence	chr4	145341842	145342530	Other	chr4	145342163	145342445
chr1	12069939	12070134	ENSG00000120949	TNFRSF8	TRUE	FALSE	no_overlap	NA	NA	NA	Conserved	NA	NA	NA
chr1	12088693	12088857	ENSG00000120949	TNFRSF8	TRUE	TRUE	high_confidence	chr4	145300384	145300537	Conserved	NA	NA	NA
chr1	12088693	12088857	ENSG00000120949	TNFRSF8	TRUE	TRUE	high_confidence	chr4	145300094	145300634	Conserved	NA	NA	NA
chr1	12102761	12102940	ENSG00000120949	TNFRSF8	TRUE	FALSE	no_overlap	NA	NA	NA	Conserved	NA	NA	NA
chr1	12133142	12133251	ENSG00000120949	TNFRSF8	TRUE	TRUE	no_overlap	NA	NA	NA	Conserved	chr4	145279026	145279132
chr1	12150503	12150740	ENSG00000120949	TNFRSF8	TRUE	TRUE	no_overlap	NA	NA	NA	Conserved	chr4	145261530	145261767
chr1	12150891	12151014	ENSG00000120949	TNFRSF8	TRUE	TRUE	no_overlap	NA	NA	NA	Conserved	chr4	145261278	145261396
chr1	12157435	12157624	ENSG00000028137	TNFRSF1B	TRUE	TRUE	high_confidence	chr4	145254453	145254801	Conserved	chr4	145254547	145254738
chr1	12157435	12157624	ENSG00000028137	TNFRSF1B	TRUE	TRUE	high_confidence	chr4	145254394	145254868	Conserved	chr4	145254547	145254738
chr1	12159944	12160072	ENSG00000028137	TNFRSF1B	TRUE	FALSE	no_overlap	NA	NA	NA	Conserved	NA	NA	NA
chr1	12161871	12162139	ENSG00000028137	TNFRSF1B	TRUE	TRUE	high_confidence	chr4	145250097	145250316	Conserved	chr4	145250128	145250325
chr1	12161871	12162139	ENSG00000028137	TNFRSF1B	TRUE	TRUE	high_confidence	chr4	145250064	145250326	Conserved	chr4	145250128	145250325
chr1	12173830	12174090	ENSG00000028137	TNFRSF1B	TRUE	TRUE	high_confidence	chr4	145240694	145240918	Conserved	chr4	145240688	145240927
chr1	12173830	12174090	ENSG00000028137	TNFRSF1B	TRUE	TRUE	high_confidence	chr4	145241087	145241207	Conserved	chr4	145240688	145240927
chr1	12173830	12174090	ENSG00000028137	TNFRSF1B	TRUE	TRUE	high_confidence	chr4	145240620	145241004	Conserved	chr4	145240688	145240927
chr1	12173830	12174090	ENSG00000028137	TNFRSF1B	TRUE	TRUE	high_confidence	chr4	145240260	145240375	Conserved	chr4	145240688	145240927
chr1	12201753	12201902	ENSG00000028137	TNFRSF1B	TRUE	TRUE	low_confidence	chr4	145219934	145220202	Conserved	chr4	145219988	145220056
chr1	12210543	12210802	ENSG00000028137	TNFRSF1B	TRUE	TRUE	no_overlap	NA	NA	NA	Conserved	NA	NA	NA
chr1	12229903	12230085	ENSG00000048707	VPS13D	TRUE	TRUE	high_confidence	chr4	145194963	145195079	Conserved	chr4	145194973	145195153
chr1	12229903	12230085	ENSG00000048707	VPS13D	TRUE	TRUE	high_confidence	chr4	145194722	145195158	Conserved	chr4	145194973	145195153
chr1	12266287	12266375	ENSG00000048707	VPS13D	TRUE	TRUE	no_overlap	NA	NA	NA	Conserved	NA	NA	NA
chr1	12385200	12385327	ENSG00000048707	VPS13D	TRUE	TRUE	no_overlap	NA	NA	NA	Conserved	chr4	145063610	145063724
chr1	12434222	12434612	ENSG00000048707	VPS13D	TRUE	TRUE	no_overlap	NA	NA	NA	Conserved	chr4	145033849	145034220
chr1	12435737	12435943	ENSG00000048707	VPS13D	TRUE	TRUE	no_overlap	NA	NA	NA	Conserved	chr4	145032676	145032860
chr1	12438498	12438844	ENSG00000048707	VPS13D	TRUE	TRUE	no_overlap	NA	NA	NA	Conserved	NA	NA	NA
chr1	12449556	12449818	ENSG00000048707	VPS13D	TRUE	TRUE	no_overlap	NA	NA	NA	Conserved	chr4	145025737	145026144
chr1	12473252	12473470	ENSG00000048707	VPS13D	TRUE	TRUE	no_overlap	NA	NA	NA	Conserved	chr4	145004983	145005152
chr1	12604445	12604660	ENSG00000162496	DHRS3	TRUE	TRUE	low_confidence	chr4	144898226	144898334	Other	chr4	144898335	144898537
chr1	12617660	12617775	ENSG00000162496	DHRS3	TRUE	TRUE	low_confidence	chr4	144893675	144893844	Other	chr4	144893036	144893159
chr1	12619952	12620048	ENSG00000162496	DHRS3	TRUE	TRUE	low_confidence	chr4	144891537	144891646	Other	chr4	144890759	144890853
chr1	12619952	12620048	ENSG00000162496	DHRS3	TRUE	TRUE	low_confidence	chr4	144890664	144890814	Other	chr4	144890759	144890853
chr1	12620601	12620792	ENSG00000162496	DHRS3	TRUE	TRUE	low_confidence	chr4	144890664	144890814	Other	chr4	144889975	144890160
chr1	13733068	13733238	ENSG00000116731	PRDM2	TRUE	TRUE	no_overlap	NA	NA	NA	Alternate	chr4	143178976	143179130
chr1	13749169	13749345	ENSG00000116731	PRDM2	TRUE	TRUE	low_confidence	chr4	143161702	143162426	Alternate	chr4	143162197	143162367
chr1	14969185	14969316	ENSG00000189337	KAZN	TRUE	TRUE	no_overlap	NA	NA	NA	Alternate	chr4	142200947	142201066
chr1	15249128	15249403	ENSG00000142621	FHAD1	TRUE	TRUE	no_overlap	NA	NA	NA	Other	NA	NA	NA
chr1	15252997	15253219	ENSG00000142621	FHAD1	TRUE	TRUE	no_overlap	NA	NA	NA	Other	chr4	142010740	142010870
chr1	15345949	15346215	ENSG00000142621	FHAD1	TRUE	TRUE	no_overlap	NA	NA	NA	Other	chr4	141932223	141932479
chr1	15411723	15411929	ENSG00000142634	EFHD2	TRUE	TRUE	no_overlap	NA	NA	NA	Other	chr4	141873074	141873231
chr1	15412241	15412438	ENSG00000142634	EFHD2	TRUE	TRUE	no_overlap	NA	NA	NA	Other	chr4	141872755	141872823
chr1	15417503	15417783	ENSG00000142634	EFHD2	TRUE	TRUE	no_overlap	NA	NA	NA	Other	NA	NA	NA
chr1	15526585	15526820	ENSG00000116138	DNAJC16	TRUE	TRUE	high_confidence	chr4	141790730	141790863	Conserved	chr4	141790721	141790954
chr1	15526585	15526820	ENSG00000116138	DNAJC16	TRUE	TRUE	high_confidence	chr4	141790633	141791035	Conserved	chr4	141790721	141790954
chr1	15603660	15603774	ENSG00000197312	DDI2	FALSE	TRUE	no_overlap	NA	NA	NA	Other	NA	NA	NA
chr1	15834362	15834591	ENSG00000065526	SPEN	TRUE	TRUE	low_confidence	chr4	141547420	141547618	Other	chr4	141547005	141547166
chr1	15834362	15834591	ENSG00000065526	SPEN	TRUE	TRUE	low_confidence	chr4	141546888	141547105	Other	chr4	141547005	141547166
chr1	15834362	15834591	ENSG00000065526	SPEN	TRUE	TRUE	low_confidence	chr4	141546531	141546718	Other	chr4	141547005	141547166
chr1	15834649	15834826	ENSG00000065526	SPEN	TRUE	TRUE	low_confidence	chr4	141547420	141547618	Other	chr4	141546848	141546982
chr1	15834649	15834826	ENSG00000065526	SPEN	TRUE	TRUE	low_confidence	chr4	141546888	141547105	Other	chr4	141546848	141546982
chr1	15834649	15834826	ENSG00000065526	SPEN	TRUE	TRUE	low_confidence	chr4	141546531	141546718	Other	chr4	141546848	141546982
chr1	15834649	15834826	ENSG00000065526	SPEN	TRUE	TRUE	low_confidence	chr4	141545854	141546285	Other	chr4	141546848	141546982
chr1	15834884	15835108	ENSG00000065526	SPEN	TRUE	TRUE	low_confidence	chr4	141547420	141547618	Other	chr4	141546610	141546789
chr1	15834884	15835108	ENSG00000065526	SPEN	TRUE	TRUE	low_confidence	chr4	141546888	141547105	Other	chr4	141546610	141546789
chr1	15834884	15835108	ENSG00000065526	SPEN	TRUE	TRUE	low_confidence	chr4	141546531	141546718	Other	chr4	141546610	141546789
chr1	15834884	15835108	ENSG00000065526	SPEN	TRUE	TRUE	low_confidence	chr4	141545854	141546285	Other	chr4	141546610	141546789
chr1	15835873	15835936	ENSG00000065526	SPEN	TRUE	TRUE	low_confidence	chr4	141546531	141546718	Other	chr4	141546072	141546132
chr1	15835873	15835936	ENSG00000065526	SPEN	TRUE	TRUE	low_confidence	chr4	141545854	141546285	Other	chr4	141546072	141546132
chr1	15847627	15847681	ENSG00000065526	SPEN	TRUE	TRUE	low_confidence	chr4	141538541	141538953	Other	chr4	141538633	141538685
chr1	15949709	15949898	ENSG00000116809	ZBTB17	TRUE	TRUE	no_overlap	NA	NA	NA	Other	chr4	141460582	141460815
chr1	16064640	16064732	ENSG00000185519	FAM131C	TRUE	TRUE	no_overlap	NA	NA	NA	Other	NA	NA	NA
chr1	16070312	16070451	ENSG00000185519	FAM131C	TRUE	TRUE	no_overlap	NA	NA	NA	Other	NA	NA	NA
chr1	16079262	16079384	ENSG00000185519	FAM131C	TRUE	TRUE	low_confidence	chr4	141363276	141363458	Other	chr4	141363101	141363179
chr1	16123043	16123218	ENSG00000142627	EPHA2	TRUE	TRUE	no_overlap	NA	NA	NA	Other	chr4	141330106	141330284
chr1	16162489	16162561	ENSG00000142627	EPHA2	TRUE	TRUE	low_confidence	chr4	141296021	141296145	Other	chr4	141296061	141296133
chr1	16167770	16167897	ENSG00000142627	EPHA2	TRUE	TRUE	no_overlap	NA	NA	NA	Other	chr4	141291797	141291915
chr1	16237133	16237229	ENSG00000132881	CPLANE2	TRUE	TRUE	low_confidence	chr4	141214686	141214850	Other	chr4	141213935	141213999
chr1	16237133	16237229	ENSG00000132881	CPLANE2	TRUE	TRUE	low_confidence	chr4	141213867	141214037	Other	chr4	141213935	141213999
chr1	16238109	16238189	ENSG00000132881	CPLANE2	TRUE	TRUE	low_confidence	chr4	141213867	141214037	Other	NA	NA	NA
chr1	16420817	16421014	ENSG00000187144	SPATA21	TRUE	TRUE	no_overlap	NA	NA	NA	Other	NA	NA	NA
chr1	16440565	16440758	ENSG00000157191	NECAP2	TRUE	TRUE	high_confidence	chr4	141078380	141078509	Conserved	chr4	141078308	141078478
chr1	16440565	16440758	ENSG00000157191	NECAP2	TRUE	TRUE	high_confidence	chr4	141078204	141078527	Conserved	chr4	141078308	141078478
chr1	16440565	16440758	ENSG00000157191	NECAP2	TRUE	TRUE	high_confidence	chr4	141077713	141077921	Conserved	chr4	141078308	141078478
chr1	16513825	16514346	ENSG00000219481	NBPF1	FALSE	FALSE	no_overlap	NA	NA	NA	Other	NA	NA	NA
chr1	16644610	16644806	ENSG00000219481	NBPF1	FALSE	TRUE	high_confidence	chr9	108079192	108079399	Other	chr9	108079233	108079426
chr1	16644610	16644806	ENSG00000219481	NBPF1	FALSE	TRUE	high_confidence	chr9	108079113	108079451	Other	chr9	108079233	108079426
chr1	16666596	16666996	ENSG00000219481	NBPF1	FALSE	FALSE	no_overlap	NA	NA	NA	Other	NA	NA	NA
chr1	16676973	16677063	ENSG00000219481	NBPF1	FALSE	FALSE	no_overlap	NA	NA	NA	Other	NA	NA	NA
chr1	16728489	16728641	ENSG00000219481	NBPF1	FALSE	FALSE	no_overlap	NA	NA	NA	Other	NA	NA	NA
chr1	16740484	16740862	ENSG00000219481	NBPF1	FALSE	FALSE	no_overlap	NA	NA	NA	Other	NA	NA	NA
chr1	16863173	16863379	ENSG00000058453	CROCC	TRUE	FALSE	no_overlap	NA	NA	NA	Other	NA	NA	NA
chr1	16895935	16896398	ENSG00000058453	CROCC	TRUE	FALSE	no_overlap	NA	NA	NA	Other	NA	NA	NA
chr1	16905078	16905243	ENSG00000058453	CROCC	TRUE	FALSE	no_overlap	NA	NA	NA	Other	NA	NA	NA
chr1	16960817	16960872	ENSG00000058453	CROCC	TRUE	TRUE	no_overlap	NA	NA	NA	Other	chr4	141025430	141025485
chr1	18902531	18902631	ENSG00000159423	ALDH4A1	TRUE	TRUE	low_confidence	chr4	139622716	139623198	Other	chr4	139623028	139623126
chr1	18926726	18926827	ENSG00000169991	IFFO2	TRUE	TRUE	high_confidence	chr4	139598953	139599132	Conserved	chr4	139599024	139599122
chr1	18926726	18926827	ENSG00000169991	IFFO2	TRUE	TRUE	high_confidence	chr4	139598899	139599398	Conserved	chr4	139599024	139599122
chr1	18926726	18926827	ENSG00000169991	IFFO2	TRUE	TRUE	high_confidence	chr4	139597903	139598140	Conserved	chr4	139599024	139599122
chr1	18927380	18927491	ENSG00000169991	IFFO2	TRUE	TRUE	high_confidence	chr4	139598953	139599132	Conserved	chr4	139597909	139598020
chr1	18927380	18927491	ENSG00000169991	IFFO2	TRUE	TRUE	high_confidence	chr4	139598899	139599398	Conserved	chr4	139597909	139598020
chr1	18927380	18927491	ENSG00000169991	IFFO2	TRUE	TRUE	high_confidence	chr4	139597903	139598140	Conserved	chr4	139597909	139598020
chr1	18927380	18927491	ENSG00000169991	IFFO2	TRUE	TRUE	high_confidence	chr4	139597347	139597570	Conserved	chr4	139597909	139598020
chr1	18927821	18927927	ENSG00000169991	IFFO2	TRUE	TRUE	high_confidence	chr4	139598953	139599132	Conserved	chr4	139597651	139597750
chr1	18927821	18927927	ENSG00000169991	IFFO2	TRUE	TRUE	high_confidence	chr4	139598899	139599398	Conserved	chr4	139597651	139597750
chr1	18927821	18927927	ENSG00000169991	IFFO2	TRUE	TRUE	high_confidence	chr4	139597903	139598140	Conserved	chr4	139597651	139597750
chr1	18927821	18927927	ENSG00000169991	IFFO2	TRUE	TRUE	high_confidence	chr4	139597347	139597570	Conserved	chr4	139597651	139597750
chr1	18948517	18948643	ENSG00000169991	IFFO2	TRUE	TRUE	no_overlap	NA	NA	NA	Conserved	chr4	139582471	139582605
chr1	18952187	18952338	ENSG00000169991	IFFO2	TRUE	TRUE	high_confidence	chr4	139579135	139579272	Conserved	chr4	139579092	139579242
chr1	18952187	18952338	ENSG00000169991	IFFO2	TRUE	TRUE	high_confidence	chr4	139579081	139579315	Conserved	chr4	139579092	139579242
chr1	19011292	19011394	ENSG00000169991	IFFO2	TRUE	TRUE	low_confidence	chr4	139535117	139535288	Conserved	chr4	139535229	139535346
chr1	19074607	19074784	ENSG00000127481	UBR4	TRUE	TRUE	no_overlap	NA	NA	NA	Other	chr4	139489271	139489445
chr1	19124017	19124185	ENSG00000127481	UBR4	TRUE	TRUE	no_overlap	NA	NA	NA	Other	chr4	139449242	139449445
chr1	19391028	19391178	ENSG00000077549	CAPZB	TRUE	TRUE	low_confidence	chr4	139251990	139252279	Conserved	chr4	139252561	139252709
chr1	19463225	19463488	ENSG00000077549	CAPZB	TRUE	TRUE	no_overlap	NA	NA	NA	Conserved	chr4	139210894	139210956
chr1	19468498	19468608	ENSG00000077549	CAPZB	TRUE	TRUE	no_overlap	NA	NA	NA	Conserved	NA	NA	NA
chr1	19477025	19477157	ENSG00000077549	CAPZB	TRUE	TRUE	high_confidence	chr4	139200044	139200272	Conserved	chr4	139200967	139201136
chr1	19477025	19477157	ENSG00000077549	CAPZB	TRUE	TRUE	high_confidence	chr4	139199984	139200379	Conserved	chr4	139200967	139201136
chr1	19477428	19477564	ENSG00000077549	CAPZB	TRUE	TRUE	high_confidence	chr4	139200044	139200272	Conserved	chr4	139200340	139200541
chr1	19477428	19477564	ENSG00000077549	CAPZB	TRUE	TRUE	high_confidence	chr4	139199984	139200379	Conserved	chr4	139200340	139200541
chr1	19477428	19477564	ENSG00000077549	CAPZB	TRUE	TRUE	high_confidence	chr4	139199230	139199435	Conserved	chr4	139200340	139200541
chr1	19485494	19485588	ENSG00000173436	MINOS1	TRUE	TRUE	low_confidence	chr4	139192425	139192821	Other	chr4	139192865	139192970
chr1	19597038	19597179	ENSG00000270136	MINOS1-NBL1	FALSE	TRUE	low_confidence	chr4	139130608	139131214	Other	chr4	139130868	139130993
chr1	19606954	19607050	ENSG00000270136	MINOS1-NBL1	FALSE	TRUE	no_overlap	NA	NA	NA	Other	chr4	139120914	139120992
chr1	19688082	19688190	ENSG00000162542	TMCO4	TRUE	TRUE	no_overlap	NA	NA	NA	Other	chr4	139055910	139055978
chr1	19688594	19688729	ENSG00000162542	TMCO4	TRUE	TRUE	no_overlap	NA	NA	NA	Other	chr4	139055146	139055570
chr1	19882212	19882345	ENSG00000169914	OTUD3	TRUE	TRUE	low_confidence	chr4	138913871	138914200	Other	chr4	138914012	138914155
chr1	20058601	20058818	ENSG00000127472	PLA2G5	TRUE	FALSE	no_overlap	NA	NA	NA	Other	NA	NA	NA
chr1	20185417	20185655	ENSG00000162543	UBXN10	TRUE	TRUE	no_overlap	NA	NA	NA	Other	chr4	138725660	138725824
chr1	20786569	20786779	ENSG00000127483	HP1BP3	TRUE	TRUE	low_confidence	chr4	138216969	138217538	Other	chr4	138217152	138217355
chr1	20932800	20932918	ENSG00000075151	EIF4G3	TRUE	FALSE	no_overlap	NA	NA	NA	Other	NA	NA	NA
chr1	21175440	21175629	ENSG00000075151	EIF4G3	TRUE	TRUE	low_confidence	chr4	137994773	137994882	Other	chr4	137994613	137994835
chr1	21280049	21280233	ENSG00000117298	ECE1	TRUE	TRUE	no_overlap	NA	NA	NA	Alternate	chr4	137920121	137920319
chr1	21294475	21294639	ENSG00000117298	ECE1	TRUE	TRUE	no_overlap	NA	NA	NA	Alternate	chr4	137908421	137908573
chr1	21294746	21294876	ENSG00000117298	ECE1	TRUE	TRUE	no_overlap	NA	NA	NA	Alternate	chr4	137908191	137908320
chr1	21334245	21334584	ENSG00000117298	ECE1	TRUE	TRUE	no_overlap	NA	NA	NA	Alternate	chr4	137871410	137871677
chr1	21343537	21343725	ENSG00000117298	ECE1	TRUE	TRUE	no_overlap	NA	NA	NA	Alternate	chr4	137864247	137864450
chr1	21659262	21659371	ENSG00000076864	RAP1GAP	TRUE	TRUE	low_confidence	chr4	137676093	137676465	Other	chr4	137676186	137676316
chr1	21783126	21783272	ENSG00000090686	USP48	TRUE	TRUE	high_confidence	chr4	137593644	137593754	Conserved	chr4	137594063	137594215
chr1	21783126	21783272	ENSG00000090686	USP48	TRUE	TRUE	high_confidence	chr4	137594507	137594831	Conserved	chr4	137594063	137594215
chr1	21783126	21783272	ENSG00000090686	USP48	TRUE	TRUE	high_confidence	chr4	137593574	137594393	Conserved	chr4	137594063	137594215
chr1	21783633	21783741	ENSG00000090686	USP48	TRUE	TRUE	high_confidence	chr4	137593644	137593754	Conserved	chr4	137593619	137593734
chr1	21783633	21783741	ENSG00000090686	USP48	TRUE	TRUE	high_confidence	chr4	137594507	137594831	Conserved	chr4	137593619	137593734
chr1	21783633	21783741	ENSG00000090686	USP48	TRUE	TRUE	high_confidence	chr4	137593574	137594393	Conserved	chr4	137593619	137593734
chr1	22025422	22025512	ENSG00000285721	AL031281.2	TRUE	FALSE	no_overlap	NA	NA	NA	Conserved	NA	NA	NA
chr1	22025933	22026087	ENSG00000285721	AL031281.2	TRUE	TRUE	no_overlap	NA	NA	NA	Conserved	NA	NA	NA
chr1	22039942	22040076	ENSG00000285721	AL031281.2	TRUE	TRUE	high_confidence	chr4	137367570	137367735	Conserved	chr4	137367731	137367952
chr1	22039942	22040076	ENSG00000285721	AL031281.2	TRUE	TRUE	high_confidence	chr4	137367470	137367971	Conserved	chr4	137367731	137367952
chr1	22052604	22052784	ENSG00000070831	CDC42	FALSE	TRUE	high_confidence	chr4	137357653	137357773	Other	chr4	137357590	137357784
chr1	22052604	22052784	ENSG00000070831	CDC42	FALSE	TRUE	high_confidence	chr4	137357547	137357870	Other	chr4	137357590	137357784
chr1	22451791	22451975	ENSG00000184677	ZBTB40	TRUE	TRUE	high_confidence	chr4	137048669	137048778	Conserved	chr4	137048675	137048864
chr1	22451791	22451975	ENSG00000184677	ZBTB40	TRUE	TRUE	high_confidence	chr4	137048607	137049027	Conserved	chr4	137048675	137048864
chr1	22885238	22885473	ENSG00000133216	EPHB2	TRUE	TRUE	no_overlap	NA	NA	NA	Alternate	chr4	136681470	136681662
chr1	23019253	23019501	ENSG00000004487	KDM1A	TRUE	TRUE	low_confidence	chr4	136602611	136602956	Other	chr4	136602682	136602904
chr1	23100350	23100567	ENSG00000169641	LUZP1	TRUE	TRUE	no_overlap	NA	NA	NA	Other	chr4	136524344	136524533
chr1	23103454	23103566	ENSG00000169641	LUZP1	TRUE	TRUE	no_overlap	NA	NA	NA	Other	NA	NA	NA
chr1	23110827	23111016	ENSG00000169641	LUZP1	TRUE	TRUE	no_overlap	NA	NA	NA	Other	NA	NA	NA
chr1	23118961	23119056	ENSG00000169641	LUZP1	TRUE	FALSE	no_overlap	NA	NA	NA	Other	NA	NA	NA
chr1	23344243	23344379	ENSG00000125944	HNRNPR	TRUE	TRUE	low_confidence	chr4	136310604	136311061	Other	chr4	136310919	136311056
chr1	23344243	23344379	ENSG00000125944	HNRNPR	TRUE	TRUE	low_confidence	chr4	136310248	136310492	Other	chr4	136310919	136311056
chr1	23524873	23525337	ENSG00000007968	E2F2	TRUE	TRUE	high_confidence	chr4	136177685	136177936	Conserved	chr4	136177735	136178217
chr1	23524873	23525337	ENSG00000007968	E2F2	TRUE	TRUE	high_confidence	chr4	136177606	136178311	Conserved	chr4	136177735	136178217
chr1	23525897	23526093	ENSG00000007968	E2F2	TRUE	TRUE	high_confidence	chr4	136177685	136177936	Conserved	chr4	136177186	136177354
chr1	23525897	23526093	ENSG00000007968	E2F2	TRUE	TRUE	high_confidence	chr4	136177606	136178311	Conserved	chr4	136177186	136177354
chr1	23528035	23528166	ENSG00000007968	E2F2	TRUE	TRUE	high_confidence	chr4	136174875	136175050	Conserved	chr4	136175156	136175324
chr1	23528035	23528166	ENSG00000007968	E2F2	TRUE	TRUE	high_confidence	chr4	136174866	136175075	Conserved	chr4	136175156	136175324
chr1	23528275	23528448	ENSG00000007968	E2F2	TRUE	TRUE	high_confidence	chr4	136174875	136175050	Conserved	chr4	136174903	136175058
chr1	23528275	23528448	ENSG00000007968	E2F2	TRUE	TRUE	high_confidence	chr4	136174866	136175075	Conserved	chr4	136174903	136175058
chr1	23531361	23531497	ENSG00000007968	E2F2	TRUE	TRUE	low_confidence	chr4	136172037	136172177	Conserved	chr4	136172103	136172226
chr1	23539960	23540085	ENSG00000007968	E2F2	TRUE	TRUE	low_confidence	chr4	136163557	136163891	Conserved	chr4	136163634	136163711
chr1	23554836	23554988	ENSG00000117318	ID3	TRUE	TRUE	no_overlap	NA	NA	NA	Other	chr4	136147911	136148070
chr1	23555052	23555082	ENSG00000117318	ID3	TRUE	TRUE	no_overlap	NA	NA	NA	Other	chr4	136147825	136147847
chr1	23559504	23559643	ENSG00000117318	ID3	TRUE	TRUE	low_confidence	chr4	136144698	136144909	Other	chr4	136143660	136143819
chr1	23559504	23559643	ENSG00000117318	ID3	TRUE	TRUE	low_confidence	chr4	136143638	136144075	Other	chr4	136143660	136143819
chr1	23691671	23691865	ENSG00000142676	RPL11	TRUE	TRUE	low_confidence	chr4	136053219	136053608	Other	chr4	136053311	136053497
chr1	23800794	23800988	ENSG00000117308	GALE	TRUE	TRUE	low_confidence	chr4	135964461	135964685	Other	chr4	135963521	135963714
chr1	23800794	23800988	ENSG00000117308	GALE	TRUE	TRUE	low_confidence	chr4	135963441	135963909	Other	chr4	135963521	135963714
chr1	23897819	23897954	ENSG00000188822	CNR2	TRUE	FALSE	no_overlap	NA	NA	NA	Other	NA	NA	NA
chr1	23959008	23959226	ENSG00000189266	PNRC2	TRUE	TRUE	low_confidence	chr4	135873701	135873877	Other	NA	NA	NA
chr1	23959008	23959226	ENSG00000189266	PNRC2	TRUE	TRUE	low_confidence	chr4	135873530	135873662	Other	NA	NA	NA
chr1	23980309	23980454	ENSG00000188529	SRSF10	TRUE	TRUE	low_confidence	chr4	135856752	135856897	Other	chr4	135856001	135856170
chr1	23980309	23980454	ENSG00000188529	SRSF10	TRUE	TRUE	low_confidence	chr4	135855808	135856298	Other	chr4	135856001	135856170
chr1	24192574	24192694	ENSG00000185436	IFNLR1	TRUE	TRUE	no_overlap	NA	NA	NA	Other	NA	NA	NA
chr1	24321753	24322066	ENSG00000158055	GRHL3	TRUE	TRUE	low_confidence	chr4	135570289	135570545	Other	chr4	135570711	135571014
chr1	24322341	24322493	ENSG00000158055	GRHL3	TRUE	TRUE	low_confidence	chr4	135570289	135570545	Other	chr4	135570332	135570465
chr1	24415542	24415747	ENSG00000001461	NIPAL3	TRUE	TRUE	low_confidence	chr4	135494493	135494836	Other	chr4	135494586	135494769
chr1	24415542	24415747	ENSG00000001461	NIPAL3	TRUE	TRUE	low_confidence	chr4	135494015	135494200	Other	chr4	135494586	135494769
chr1	24481234	24481345	ENSG00000001461	NIPAL3	TRUE	FALSE	no_overlap	NA	NA	NA	Other	NA	NA	NA
chr1	24502842	24502913	ENSG00000117602	RCAN3	TRUE	TRUE	low_confidence	chr4	135433733	135434371	Alternate	chr4	135433724	135433812
chr1	24535106	24535311	ENSG00000117602	RCAN3	TRUE	TRUE	low_confidence	chr4	135416432	135416575	Alternate	chr4	135416391	135416585
chr1	24536719	24536812	ENSG00000117602	RCAN3	TRUE	TRUE	no_overlap	NA	NA	NA	Alternate	NA	NA	NA
chr1	24642881	24643006	ENSG00000133226	SRRM1	TRUE	TRUE	low_confidence	chr4	135353127	135353803	Other	chr4	135353429	135353571
chr1	24642881	24643006	ENSG00000133226	SRRM1	TRUE	TRUE	low_confidence	chr4	135352922	135353057	Other	chr4	135353429	135353571
chr1	24642881	24643006	ENSG00000133226	SRRM1	TRUE	TRUE	low_confidence	chr4	135352353	135352473	Other	chr4	135353429	135353571
chr1	24710180	24710294	ENSG00000169504	CLIC4	TRUE	FALSE	no_overlap	NA	NA	NA	Conserved	NA	NA	NA
chr1	24848043	24848642	ENSG00000169504	CLIC4	TRUE	TRUE	high_confidence	chr4	135206156	135206527	Conserved	chr4	135206084	135206571
chr1	24848043	24848642	ENSG00000169504	CLIC4	TRUE	TRUE	high_confidence	chr4	135206109	135206600	Conserved	chr4	135206084	135206571
chr1	24911181	24911581	ENSG00000020633	RUNX3	TRUE	TRUE	no_overlap	NA	NA	NA	Conserved	chr4	135169065	135169366
chr1	24925107	24925444	ENSG00000020633	RUNX3	TRUE	TRUE	high_confidence	chr4	135157430	135157559	Conserved	chr4	135157400	135157713
chr1	24925107	24925444	ENSG00000020633	RUNX3	TRUE	TRUE	high_confidence	chr4	135157388	135157618	Conserved	chr4	135157400	135157713
chr1	24929097	24929324	ENSG00000020633	RUNX3	TRUE	TRUE	low_confidence	chr4	135153780	135153908	Conserved	chr4	135153684	135153899
chr1	24929097	24929324	ENSG00000020633	RUNX3	TRUE	TRUE	low_confidence	chr17	44736128	44736241	Conserved	chr4	135153684	135153899
chr1	24929688	24929905	ENSG00000020633	RUNX3	TRUE	TRUE	low_confidence	chr4	135153780	135153908	Conserved	chr4	135152753	135152955
chr1	24929688	24929905	ENSG00000020633	RUNX3	TRUE	TRUE	low_confidence	chr4	135152251	135152415	Conserved	chr4	135152753	135152955
chr1	24929688	24929905	ENSG00000020633	RUNX3	TRUE	TRUE	low_confidence	chr17	44736128	44736241	Conserved	chr4	135152753	135152955
chr1	24930302	24930601	ENSG00000020633	RUNX3	TRUE	TRUE	low_confidence	chr4	135152251	135152415	Conserved	chr4	135152271	135152519
chr1	24930302	24930601	ENSG00000020633	RUNX3	TRUE	TRUE	low_confidence	chr17	44736128	44736241	Conserved	chr4	135152271	135152519
chr1	24952441	24952897	ENSG00000020633	RUNX3	TRUE	TRUE	no_overlap	NA	NA	NA	Conserved	chr4	135133287	135133516
chr1	24955201	24955425	ENSG00000020633	RUNX3	TRUE	TRUE	no_overlap	NA	NA	NA	Conserved	chr4	135130868	135130971
chr1	24965017	24965426	ENSG00000020633	RUNX3	TRUE	TRUE	high_confidence	chr4	135120366	135120586	Conserved	chr4	135120234	135120634
chr1	24965017	24965426	ENSG00000020633	RUNX3	TRUE	TRUE	high_confidence	chr4	135120284	135120667	Conserved	chr4	135120234	135120634
chr1	24966792	24966887	ENSG00000020633	RUNX3	TRUE	TRUE	low_confidence	chr4	135119014	135119238	Conserved	chr4	135119022	135119114
chr1	24966792	24966887	ENSG00000020633	RUNX3	TRUE	TRUE	low_confidence	chr4	135118664	135118806	Conserved	chr4	135119022	135119114
chr1	24985137	24985378	ENSG00000020633	RUNX3	TRUE	TRUE	high_confidence	chr4	135108745	135108924	Conserved	chr4	135108726	135108959
chr1	24985137	24985378	ENSG00000020633	RUNX3	TRUE	TRUE	high_confidence	chr4	135108654	135109082	Conserved	chr4	135108726	135108959
chr1	24992783	24993252	ENSG00000020633	RUNX3	TRUE	TRUE	high_confidence	chr4	135103905	135104105	Conserved	chr4	135102674	135103098
chr1	24992783	24993252	ENSG00000020633	RUNX3	TRUE	TRUE	high_confidence	chr4	135102885	135103034	Conserved	chr4	135102674	135103098
chr1	24992783	24993252	ENSG00000020633	RUNX3	TRUE	TRUE	high_confidence	chr4	135103875	135104386	Conserved	chr4	135102674	135103098
chr1	24992783	24993252	ENSG00000020633	RUNX3	TRUE	TRUE	high_confidence	chr4	135102793	135103060	Conserved	chr4	135102674	135103098
chr1	25022329	25022705	ENSG00000020633	RUNX3	TRUE	TRUE	high_confidence	chr4	135080397	135080745	Conserved	chr4	135080325	135080703
chr1	25022329	25022705	ENSG00000020633	RUNX3	TRUE	TRUE	high_confidence	chr4	135079920	135080120	Conserved	chr4	135080325	135080703
chr1	25022329	25022705	ENSG00000020633	RUNX3	TRUE	TRUE	high_confidence	chr4	135080311	135080860	Conserved	chr4	135080325	135080703
chr1	25022329	25022705	ENSG00000020633	RUNX3	TRUE	TRUE	high_confidence	chr4	135079834	135080255	Conserved	chr4	135080325	135080703
chr1	25022877	25023109	ENSG00000020633	RUNX3	TRUE	TRUE	high_confidence	chr4	135080397	135080745	Conserved	chr4	135079934	135080181
chr1	25022877	25023109	ENSG00000020633	RUNX3	TRUE	TRUE	high_confidence	chr4	135079920	135080120	Conserved	chr4	135079934	135080181
chr1	25022877	25023109	ENSG00000020633	RUNX3	TRUE	TRUE	high_confidence	chr4	135080311	135080860	Conserved	chr4	135079934	135080181
chr1	25022877	25023109	ENSG00000020633	RUNX3	TRUE	TRUE	high_confidence	chr4	135079834	135080255	Conserved	chr4	135079934	135080181
chr1	25028881	25029162	ENSG00000020633	RUNX3	TRUE	TRUE	no_overlap	NA	NA	NA	Conserved	chr4	135075174	135075445
chr1	25029345	25029607	ENSG00000020633	RUNX3	TRUE	TRUE	no_overlap	NA	NA	NA	Conserved	chr4	135074760	135074980
chr1	25030738	25031132	ENSG00000020633	RUNX3	TRUE	TRUE	high_confidence	chr4	135073638	135073881	Conserved	chr4	135073548	135073811
chr1	25030738	25031132	ENSG00000020633	RUNX3	TRUE	TRUE	high_confidence	chr4	135073544	135073903	Conserved	chr4	135073548	135073811
chr1	25037262	25037371	ENSG00000020633	RUNX3	TRUE	TRUE	low_confidence	chr4	135067989	135068204	Conserved	chr4	135067300	135067404
chr1	25037262	25037371	ENSG00000020633	RUNX3	TRUE	TRUE	low_confidence	chr4	135067179	135067486	Conserved	chr4	135067300	135067404
chr1	25037262	25037371	ENSG00000020633	RUNX3	TRUE	TRUE	low_confidence	chr4	135066833	135067135	Conserved	chr4	135067300	135067404
chr1	25064635	25064788	ENSG00000020633	RUNX3	TRUE	TRUE	high_confidence	chr4	135053718	135053905	Conserved	chr4	135053741	135053845
chr1	25064635	25064788	ENSG00000020633	RUNX3	TRUE	TRUE	high_confidence	chr4	135053638	135053931	Conserved	chr4	135053741	135053845
chr1	25065982	25066073	ENSG00000020633	RUNX3	TRUE	TRUE	no_overlap	NA	NA	NA	Conserved	chr4	135051799	135051889
chr1	25095671	25095935	ENSG00000117614	SYF2	TRUE	TRUE	no_overlap	NA	NA	NA	Conserved	chr4	135020071	135020312
chr1	25099441	25099752	ENSG00000117614	SYF2	TRUE	TRUE	high_confidence	chr4	135019273	135019415	Conserved	NA	NA	NA
chr1	25099441	25099752	ENSG00000117614	SYF2	TRUE	TRUE	high_confidence	chr4	135019213	135019450	Conserved	NA	NA	NA
chr1	25099828	25099970	ENSG00000117614	SYF2	TRUE	TRUE	high_confidence	chr4	135019273	135019415	Conserved	NA	NA	NA
chr1	25099828	25099970	ENSG00000117614	SYF2	TRUE	TRUE	high_confidence	chr4	135019213	135019450	Conserved	NA	NA	NA
chr1	25101573	25101681	ENSG00000117614	SYF2	TRUE	TRUE	low_confidence	chr4	135018171	135018328	Conserved	chr4	135018189	135018287
chr1	25109770	25109865	ENSG00000117614	SYF2	TRUE	TRUE	no_overlap	NA	NA	NA	Conserved	NA	NA	NA
chr1	25247343	25247485	ENSG00000117616	RSRP1	TRUE	TRUE	low_confidence	chr4	134924436	134924681	Other	chr4	134923595	134923736
chr1	25247343	25247485	ENSG00000117616	RSRP1	TRUE	TRUE	low_confidence	chr4	134923263	134923877	Other	chr4	134923595	134923736
chr1	25549694	25549900	ENSG00000157978	LDLRAP1	TRUE	TRUE	no_overlap	NA	NA	NA	Alternate	chr4	134762549	134762709
chr1	25562568	25562831	ENSG00000157978	LDLRAP1	TRUE	TRUE	low_confidence	chr4	134750307	134750601	Alternate	chr4	134750271	134750530
chr1	25562568	25562831	ENSG00000157978	LDLRAP1	TRUE	TRUE	low_confidence	chr4	134749413	134749593	Alternate	chr4	134750271	134750530
chr1	25587438	25587514	ENSG00000157978	LDLRAP1	TRUE	TRUE	low_confidence	chr4	134727648	134727757	Alternate	chr4	134727695	134727703
chr1	25642775	25642932	ENSG00000117643	MAN1C1	TRUE	TRUE	no_overlap	NA	NA	NA	Other	chr4	134683071	134683232
chr1	25676102	25676335	ENSG00000117643	MAN1C1	TRUE	TRUE	no_overlap	NA	NA	NA	Other	NA	NA	NA
chr1	25704485	25704646	ENSG00000117643	MAN1C1	TRUE	TRUE	no_overlap	NA	NA	NA	Other	chr4	134624230	134624394
chr1	25819902	25820134	ENSG00000117640	MTFR1L	TRUE	TRUE	low_confidence	chr4	134535136	134535536	Other	chr4	134535126	134535344
chr1	25819902	25820134	ENSG00000117640	MTFR1L	TRUE	TRUE	low_confidence	chr4	134534430	134534610	Other	chr4	134535126	134535344
chr1	25859394	25859599	ENSG00000127423	AUNIP	TRUE	TRUE	low_confidence	chr4	134510915	134511399	Other	chr4	134510977	134511066
chr1	25905512	25905615	ENSG00000117632	STMN1	TRUE	TRUE	low_confidence	chr4	134468813	134469232	Other	chr4	134469030	134469135
chr1	25905512	25905615	ENSG00000117632	STMN1	TRUE	TRUE	low_confidence	chr4	134468216	134468509	Other	chr4	134469030	134469135
chr1	25906398	25906525	ENSG00000117632	STMN1	TRUE	TRUE	low_confidence	chr4	134468813	134469232	Other	chr4	134468293	134468420
chr1	25906398	25906525	ENSG00000117632	STMN1	TRUE	TRUE	low_confidence	chr4	134468216	134468509	Other	chr4	134468293	134468420
chr1	25918142	25918269	ENSG00000117632	STMN1	TRUE	TRUE	no_overlap	NA	NA	NA	Other	chr4	134457506	134457632
chr1	25922714	25922867	ENSG00000117632	STMN1	TRUE	FALSE	no_overlap	NA	NA	NA	Other	NA	NA	NA
chr1	25990835	25991015	ENSG00000158006	PAFAH2	TRUE	TRUE	no_overlap	NA	NA	NA	Conserved	chr4	134402802	134402996
chr1	25998219	25998452	ENSG00000158006	PAFAH2	TRUE	TRUE	high_confidence	chr4	134396035	134396332	Conserved	chr4	134396015	134396236
chr1	25998219	25998452	ENSG00000158006	PAFAH2	TRUE	TRUE	high_confidence	chr4	134395979	134396374	Conserved	chr4	134396015	134396236
chr1	26111035	26111181	ENSG00000175087	PDIK1L	TRUE	TRUE	low_confidence	chr4	134287173	134287987	Other	chr4	134287813	134287946
chr1	26111594	26111880	ENSG00000175087	PDIK1L	TRUE	TRUE	low_confidence	chr4	134287173	134287987	Other	chr4	134287196	134287493
chr1	26126476	26126781	ENSG00000175087	PDIK1L	TRUE	TRUE	low_confidence	chr4	134273338	134273749	Other	chr4	134273176	134273606
chr1	26166746	26167099	ENSG00000282872	C1orf232	TRUE	TRUE	no_overlap	NA	NA	NA	Other	chr4	134247642	134247986
chr1	26202006	26202070	ENSG00000188782	CATSPER4	TRUE	TRUE	no_overlap	NA	NA	NA	Hs-Specific	chr4	134207680	134207820
chr1	26234188	26234253	ENSG00000130695	CEP85	TRUE	TRUE	low_confidence	chr4	134186849	134187511	Alternate	chr4	134187000	134187064
chr1	26276289	26276523	ENSG00000130695	CEP85	TRUE	TRUE	no_overlap	NA	NA	NA	Alternate	chr4	134132469	134132715
chr1	26279924	26280134	ENSG00000142669	SH3BGRL3	TRUE	TRUE	no_overlap	NA	NA	NA	Other	chr4	134128690	134128868
chr1	26280380	26280562	ENSG00000142669	SH3BGRL3	TRUE	TRUE	no_overlap	NA	NA	NA	Other	chr4	134128282	134128462
chr1	26284818	26285073	ENSG00000158062	UBXN11	TRUE	TRUE	high_confidence	chr4	134124392	134124540	Conserved	chr4	134124326	134124568
chr1	26284818	26285073	ENSG00000158062	UBXN11	TRUE	TRUE	high_confidence	chr4	134124328	134124613	Conserved	chr4	134124326	134124568
chr1	26284818	26285073	ENSG00000158062	UBXN11	TRUE	TRUE	high_confidence	chr4	134124097	134124282	Conserved	chr4	134124326	134124568
chr1	26287463	26287716	ENSG00000158062	UBXN11	TRUE	TRUE	no_overlap	NA	NA	NA	Conserved	chr4	134121710	134122167
chr1	26317726	26317931	ENSG00000158062	UBXN11	TRUE	TRUE	low_confidence	chr4	134095042	134095256	Conserved	chr4	134095066	134095260
chr1	26363911	26364057	ENSG00000176083	ZNF683	FALSE	TRUE	no_overlap	NA	NA	NA	Other	chr4	134056931	134057030
chr1	26370693	26370834	ENSG00000176083	ZNF683	FALSE	TRUE	low_confidence	chr4	134052552	134052687	Other	chr4	134052628	134052740
chr1	26373382	26373555	ENSG00000176083	ZNF683	FALSE	TRUE	no_overlap	NA	NA	NA	Other	chr4	134052425	134052430
chr1	26375199	26375382	ENSG00000176083	ZNF683	FALSE	FALSE	no_overlap	NA	NA	NA	Other	NA	NA	NA
chr1	26378173	26378859	ENSG00000176083	ZNF683	FALSE	TRUE	high_confidence	chr4	134047710	134048025	Other	chr4	134047625	134048297
chr1	26378173	26378859	ENSG00000176083	ZNF683	FALSE	TRUE	high_confidence	chr4	134047687	134048090	Other	chr4	134047625	134048297
chr1	26384161	26384415	ENSG00000176083	ZNF683	FALSE	FALSE	no_overlap	NA	NA	NA	Other	NA	NA	NA
chr1	26408668	26408762	ENSG00000131914	LIN28A	TRUE	TRUE	low_confidence	chr4	134020734	134020890	Other	chr4	134020781	134020873
chr1	26432108	26432323	ENSG00000117682	DHDDS	TRUE	TRUE	low_confidence	chr4	134000670	134001205	Other	chr4	134000864	134001045
chr1	26472969	26473266	ENSG00000198830	HMGN2	FALSE	TRUE	high_confidence	chr4	133967227	133967358	Other	chr4	133967218	133967486
chr1	26472969	26473266	ENSG00000198830	HMGN2	FALSE	TRUE	high_confidence	chr4	133967130	133967502	Other	chr4	133967218	133967486
chr1	26500949	26501189	ENSG00000198830	HMGN2	FALSE	TRUE	low_confidence	chr4	133910295	133911243	Other	chr4	133910625	133910817
chr1	26501250	26501309	ENSG00000198830	HMGN2	FALSE	TRUE	low_confidence	chr4	133910295	133911243	Other	chr4	133910544	133910563
chr1	26541943	26542126	ENSG00000117676	RPS6KA1	TRUE	TRUE	no_overlap	NA	NA	NA	Conserved	chr4	133875504	133875636
chr1	26545641	26545816	ENSG00000117676	RPS6KA1	TRUE	TRUE	low_confidence	chr4	133872916	133873214	Conserved	chr4	133873058	133873225
chr1	26545641	26545816	ENSG00000117676	RPS6KA1	TRUE	TRUE	low_confidence	chr7	97795867	97796105	Conserved	chr4	133873058	133873225
chr1	26620352	26620753	ENSG00000117676	RPS6KA1	TRUE	TRUE	high_confidence	chr4	133814254	133814419	Conserved	chr4	133814027	133814394
chr1	26620352	26620753	ENSG00000117676	RPS6KA1	TRUE	TRUE	high_confidence	chr4	133814086	133814182	Conserved	chr4	133814027	133814394
chr1	26620352	26620753	ENSG00000117676	RPS6KA1	TRUE	TRUE	high_confidence	chr4	133814068	133814561	Conserved	chr4	133814027	133814394
chr1	26620352	26620753	ENSG00000117676	RPS6KA1	TRUE	TRUE	high_confidence	chr4	133813734	133813948	Conserved	chr4	133814027	133814394
chr1	26620352	26620753	ENSG00000117676	RPS6KA1	TRUE	TRUE	high_confidence	chr4	133813205	133813631	Conserved	chr4	133814027	133814394
chr1	26620826	26621057	ENSG00000117676	RPS6KA1	TRUE	TRUE	high_confidence	chr4	133814254	133814419	Conserved	chr4	133813729	133813954
chr1	26620826	26621057	ENSG00000117676	RPS6KA1	TRUE	TRUE	high_confidence	chr4	133814086	133814182	Conserved	chr4	133813729	133813954
chr1	26620826	26621057	ENSG00000117676	RPS6KA1	TRUE	TRUE	high_confidence	chr4	133814068	133814561	Conserved	chr4	133813729	133813954
chr1	26620826	26621057	ENSG00000117676	RPS6KA1	TRUE	TRUE	high_confidence	chr4	133813734	133813948	Conserved	chr4	133813729	133813954
chr1	26620826	26621057	ENSG00000117676	RPS6KA1	TRUE	TRUE	high_confidence	chr4	133813205	133813631	Conserved	chr4	133813729	133813954
chr1	26621191	26621399	ENSG00000117676	RPS6KA1	TRUE	TRUE	high_confidence	chr4	133814254	133814419	Conserved	chr4	133813354	133813591
chr1	26621191	26621399	ENSG00000117676	RPS6KA1	TRUE	TRUE	high_confidence	chr4	133814086	133814182	Conserved	chr4	133813354	133813591
chr1	26621191	26621399	ENSG00000117676	RPS6KA1	TRUE	TRUE	high_confidence	chr4	133814068	133814561	Conserved	chr4	133813354	133813591
chr1	26621191	26621399	ENSG00000117676	RPS6KA1	TRUE	TRUE	high_confidence	chr4	133813734	133813948	Conserved	chr4	133813354	133813591
chr1	26621191	26621399	ENSG00000117676	RPS6KA1	TRUE	TRUE	high_confidence	chr4	133813205	133813631	Conserved	chr4	133813354	133813591
chr1	26621453	26621561	ENSG00000117676	RPS6KA1	TRUE	TRUE	high_confidence	chr4	133814254	133814419	Conserved	chr4	133813222	133813299
chr1	26621453	26621561	ENSG00000117676	RPS6KA1	TRUE	TRUE	high_confidence	chr4	133814086	133814182	Conserved	chr4	133813222	133813299
chr1	26621453	26621561	ENSG00000117676	RPS6KA1	TRUE	TRUE	high_confidence	chr4	133814068	133814561	Conserved	chr4	133813222	133813299
chr1	26621453	26621561	ENSG00000117676	RPS6KA1	TRUE	TRUE	high_confidence	chr4	133813734	133813948	Conserved	chr4	133813222	133813299
chr1	26621453	26621561	ENSG00000117676	RPS6KA1	TRUE	TRUE	high_confidence	chr4	133813205	133813631	Conserved	chr4	133813222	133813299
chr1	26692465	26692644	ENSG00000117713	ARID1A	TRUE	TRUE	high_confidence	chr4	133757431	133757546	Conserved	chr4	133757364	133757542
chr1	26692465	26692644	ENSG00000117713	ARID1A	TRUE	TRUE	high_confidence	chr4	133756803	133756930	Conserved	chr4	133757364	133757542
chr1	26692465	26692644	ENSG00000117713	ARID1A	TRUE	TRUE	high_confidence	chr4	133757333	133757800	Conserved	chr4	133757364	133757542
chr1	26692465	26692644	ENSG00000117713	ARID1A	TRUE	TRUE	high_confidence	chr4	133756715	133756977	Conserved	chr4	133757364	133757542
chr1	26693049	26693314	ENSG00000117713	ARID1A	TRUE	TRUE	high_confidence	chr4	133757431	133757546	Conserved	chr4	133756695	133756958
chr1	26693049	26693314	ENSG00000117713	ARID1A	TRUE	TRUE	high_confidence	chr4	133756803	133756930	Conserved	chr4	133756695	133756958
chr1	26693049	26693314	ENSG00000117713	ARID1A	TRUE	TRUE	high_confidence	chr4	133757333	133757800	Conserved	chr4	133756695	133756958
chr1	26693049	26693314	ENSG00000117713	ARID1A	TRUE	TRUE	high_confidence	chr4	133756715	133756977	Conserved	chr4	133756695	133756958
chr1	26695467	26695933	ENSG00000117713	ARID1A	TRUE	TRUE	high_confidence	chr4	133754306	133754497	Conserved	chr4	133754096	133754586
chr1	26695467	26695933	ENSG00000117713	ARID1A	TRUE	TRUE	high_confidence	chr4	133754292	133754596	Conserved	chr4	133754096	133754586
chr1	26723567	26723726	ENSG00000117713	ARID1A	TRUE	TRUE	low_confidence	chr4	133729598	133730076	Conserved	chr4	133729730	133729889
chr1	26734170	26734273	ENSG00000117713	ARID1A	TRUE	TRUE	no_overlap	NA	NA	NA	Conserved	chr4	133717175	133717266
chr1	26744165	26744391	ENSG00000117713	ARID1A	TRUE	TRUE	high_confidence	chr4	133707028	133707220	Conserved	chr4	133706996	133707215
chr1	26744165	26744391	ENSG00000117713	ARID1A	TRUE	TRUE	high_confidence	chr4	133707007	133707293	Conserved	chr4	133706996	133707215
chr1	26787208	26787745	ENSG00000060642	PIGV	TRUE	TRUE	high_confidence	chr4	133672753	133673090	Conserved	chr4	133672806	133673332
chr1	26787208	26787745	ENSG00000060642	PIGV	TRUE	TRUE	high_confidence	chr4	133672183	133673221	Conserved	chr4	133672806	133673332
chr1	26800308	26800436	ENSG00000060642	PIGV	TRUE	TRUE	low_confidence	chr4	133660813	133661254	Conserved	chr4	133659911	133660031
chr1	26800308	26800436	ENSG00000060642	PIGV	TRUE	TRUE	low_confidence	chr4	133660194	133660399	Conserved	chr4	133659911	133660031
chr1	26810179	26810267	ENSG00000060642	PIGV	TRUE	FALSE	no_overlap	NA	NA	NA	Conserved	NA	NA	NA
chr1	26833648	26833839	ENSG00000204160	ZDHHC18	TRUE	TRUE	high_confidence	chr4	133625895	133625992	Conserved	chr4	133625834	133626028
chr1	26833648	26833839	ENSG00000204160	ZDHHC18	TRUE	TRUE	high_confidence	chr4	133625757	133626066	Conserved	chr4	133625834	133626028
chr1	26833648	26833839	ENSG00000204160	ZDHHC18	TRUE	TRUE	high_confidence	chr4	133625421	133625573	Conserved	chr4	133625834	133626028
chr1	26833648	26833839	ENSG00000204160	ZDHHC18	TRUE	TRUE	high_confidence	chr4	133624889	133625018	Conserved	chr4	133625834	133626028
chr1	26865139	26865341	ENSG00000175793	SFN	TRUE	TRUE	low_confidence	chr4	133599580	133600046	Other	chr4	133599781	133599943
chr1	27112211	27112330	ENSG00000090020	SLC9A1	TRUE	FALSE	no_overlap	NA	NA	NA	Conserved	NA	NA	NA
chr1	27137337	27137457	ENSG00000090020	SLC9A1	TRUE	TRUE	no_overlap	NA	NA	NA	Conserved	chr4	133390679	133390796
chr1	27155072	27155284	ENSG00000090020	SLC9A1	TRUE	TRUE	high_confidence	chr4	133369617	133369801	Conserved	chr4	133369613	133369827
chr1	27155072	27155284	ENSG00000090020	SLC9A1	TRUE	TRUE	high_confidence	chr4	133369542	133370049	Conserved	chr4	133369613	133369827
chr1	27322035	27322275	ENSG00000186501	TMEM222	TRUE	TRUE	low_confidence	chr4	133277439	133278019	Other	chr4	133277647	133277873
chr1	27341902	27342045	ENSG00000142765	SYTL1	TRUE	TRUE	low_confidence	chr4	133263554	133263665	Other	chr4	133263085	133263268
chr1	27341902	27342045	ENSG00000142765	SYTL1	TRUE	TRUE	low_confidence	chr4	133263033	133263202	Other	chr4	133263085	133263268
chr1	27343375	27343639	ENSG00000142765	SYTL1	TRUE	TRUE	no_overlap	NA	NA	NA	Other	chr4	133261701	133261902
chr1	27392385	27392491	ENSG00000181773	GPR3	TRUE	TRUE	low_confidence	chr4	133212592	133213051	Other	chr4	133212674	133212778
chr1	27418472	27418582	ENSG00000158195	WASF2	TRUE	TRUE	high_confidence	chr4	133185336	133185574	Conserved	chr4	133185450	133185545
chr1	27418472	27418582	ENSG00000158195	WASF2	TRUE	TRUE	high_confidence	chr4	133185117	133185718	Conserved	chr4	133185450	133185545
chr1	27604144	27604208	ENSG00000126705	AHDC1	TRUE	TRUE	low_confidence	chr4	133012077	133012195	Other	chr4	133011475	133011539
chr1	27604144	27604208	ENSG00000126705	AHDC1	TRUE	TRUE	low_confidence	chr4	133011317	133011670	Other	chr4	133011475	133011539
chr1	27608771	27608899	ENSG00000000938	FGR	TRUE	TRUE	low_confidence	chr4	133005334	133005564	Conserved	chr4	133005425	133005493
chr1	27618453	27618750	ENSG00000000938	FGR	TRUE	TRUE	no_overlap	NA	NA	NA	Conserved	NA	NA	NA
chr1	27631846	27631919	ENSG00000000938	FGR	TRUE	TRUE	high_confidence	chr4	132976773	132977086	Conserved	chr4	132976935	132977002
chr1	27631846	27631919	ENSG00000000938	FGR	TRUE	TRUE	high_confidence	chr4	132976727	132977095	Conserved	chr4	132976935	132977002
chr1	27632813	27633094	ENSG00000000938	FGR	TRUE	TRUE	high_confidence	chr4	132976773	132977086	Conserved	chr4	132975990	132976244
chr1	27632813	27633094	ENSG00000000938	FGR	TRUE	TRUE	high_confidence	chr4	132975992	132976125	Conserved	chr4	132975990	132976244
chr1	27632813	27633094	ENSG00000000938	FGR	TRUE	TRUE	high_confidence	chr4	132976727	132977095	Conserved	chr4	132975990	132976244
chr1	27632813	27633094	ENSG00000000938	FGR	TRUE	TRUE	high_confidence	chr4	132975955	132976155	Conserved	chr4	132975990	132976244
chr1	27634238	27634530	ENSG00000000938	FGR	TRUE	TRUE	no_overlap	NA	NA	NA	Conserved	chr4	132974818	132975086
chr1	27659787	27659878	ENSG00000126709	IFI6	FALSE	TRUE	no_overlap	NA	NA	NA	Other	chr4	132950252	132950343
chr1	27660051	27660140	ENSG00000126709	IFI6	FALSE	TRUE	no_overlap	NA	NA	NA	Other	NA	NA	NA
chr1	27662764	27662960	ENSG00000126709	IFI6	FALSE	TRUE	high_confidence	chr4	132946489	132946529	Other	chr4	132946097	132946269
chr1	27662764	27662960	ENSG00000126709	IFI6	FALSE	TRUE	high_confidence	chr4	132946128	132946259	Other	chr4	132946097	132946269
chr1	27662764	27662960	ENSG00000126709	IFI6	FALSE	TRUE	high_confidence	chr4	132946065	132946633	Other	chr4	132946097	132946269
chr1	27662764	27662960	ENSG00000126709	IFI6	FALSE	TRUE	high_confidence	chr4	132945309	132945788	Other	chr4	132946097	132946269
chr1	27669267	27669358	ENSG00000126709	IFI6	FALSE	TRUE	low_confidence	chr4	132939750	132940045	Other	chr4	132939603	132939668
chr1	27669267	27669358	ENSG00000126709	IFI6	FALSE	TRUE	low_confidence	chr4	132939585	132939694	Other	chr4	132939603	132939668
chr1	27672276	27672368	ENSG00000126709	IFI6	FALSE	TRUE	no_overlap	NA	NA	NA	Other	chr4	132938461	132938509
chr1	27725643	27725830	ENSG00000009780	FAM76A	TRUE	TRUE	low_confidence	chr4	132922550	132923034	Other	chr4	132922681	132922869
chr1	27725643	27725830	ENSG00000009780	FAM76A	TRUE	TRUE	low_confidence	chr4	132922332	132922471	Other	chr4	132922681	132922869
chr1	27772949	27773061	ENSG00000117758	STX12	TRUE	TRUE	low_confidence	chr4	132884330	132884903	Other	chr4	132886702	132886811
chr1	27772949	27773061	ENSG00000117758	STX12	TRUE	TRUE	low_confidence	chr4	132883791	132883950	Other	chr4	132886702	132886811
chr1	27830719	27830904	ENSG00000117751	PPP1R8	TRUE	TRUE	high_confidence	chr4	132843060	132843213	Conserved	chr4	132843044	132843224
chr1	27830719	27830904	ENSG00000117751	PPP1R8	TRUE	TRUE	high_confidence	chr4	132842945	132843473	Conserved	chr4	132843044	132843224
chr1	27869111	27869353	ENSG00000130775	THEMIS2	TRUE	TRUE	no_overlap	NA	NA	NA	Other	NA	NA	NA
chr1	27887246	27887524	ENSG00000130775	THEMIS2	TRUE	TRUE	no_overlap	NA	NA	NA	Other	chr4	132780730	132781067
chr1	27891612	27891783	ENSG00000117748	RPA2	TRUE	TRUE	no_overlap	NA	NA	NA	Other	chr4	132778254	132778410
chr1	27943531	27943682	ENSG00000130768	SMPDL3B	TRUE	TRUE	low_confidence	chr4	132747723	132747956	Other	chr4	132747721	132747872
chr1	27992409	27992502	ENSG00000158161	EYA3	TRUE	TRUE	no_overlap	NA	NA	NA	Other	NA	NA	NA
chr1	28115344	28115497	ENSG00000158161	EYA3	TRUE	TRUE	no_overlap	NA	NA	NA	Other	NA	NA	NA
chr1	28169348	28169680	ENSG00000169403	PTAFR	TRUE	FALSE	no_overlap	NA	NA	NA	Other	NA	NA	NA
chr1	28172722	28172977	ENSG00000169403	PTAFR	TRUE	FALSE	no_overlap	NA	NA	NA	Other	NA	NA	NA
chr1	28181081	28181172	ENSG00000169403	PTAFR	TRUE	FALSE	no_overlap	NA	NA	NA	Other	NA	NA	NA
chr1	28199344	28199879	ENSG00000126698	DNAJC8	TRUE	TRUE	low_confidence	chr4	132554168	132554277	Other	chr4	132554415	132554612
chr1	28200053	28200295	ENSG00000126698	DNAJC8	TRUE	TRUE	low_confidence	chr4	132554168	132554277	Other	chr4	132554130	132554270
chr1	28247420	28247554	ENSG00000130770	ATP5IF1	TRUE	TRUE	no_overlap	NA	NA	NA	Other	chr4	132515519	132515557
chr1	28256225	28256556	ENSG00000130766	SESN2	TRUE	TRUE	no_overlap	NA	NA	NA	Conserved	NA	NA	NA
chr1	28259478	28259595	ENSG00000130766	SESN2	TRUE	TRUE	high_confidence	chr4	132510590	132510871	Conserved	chr4	132510388	132510503
chr1	28259478	28259595	ENSG00000130766	SESN2	TRUE	TRUE	high_confidence	chr4	132511093	132511381	Conserved	chr4	132510388	132510503
chr1	28259478	28259595	ENSG00000130766	SESN2	TRUE	TRUE	high_confidence	chr4	132510265	132511025	Conserved	chr4	132510388	132510503
chr1	28366070	28366215	ENSG00000204138	PHACTR4	TRUE	FALSE	no_overlap	NA	NA	NA	Other	NA	NA	NA
chr1	28518135	28518232	ENSG00000180198	RCC1	TRUE	TRUE	low_confidence	chr4	132345466	132345835	Other	chr4	132345721	132345815
chr1	28518135	28518232	ENSG00000180198	RCC1	TRUE	TRUE	low_confidence	chr4	132344725	132344948	Other	chr4	132345721	132345815
chr1	28552851	28553157	ENSG00000180098	TRNAU1AP	TRUE	TRUE	low_confidence	chr4	132329336	132329667	Other	chr4	132329336	132329535
chr1	28581762	28582088	ENSG00000180098	TRNAU1AP	TRUE	TRUE	low_confidence	chr4	132309332	132309498	Other	NA	NA	NA
chr1	28642985	28643266	ENSG00000120656	TAF12	TRUE	TRUE	low_confidence	chr4	132274240	132274529	Other	chr4	132274217	132274494
chr1	28648577	28648823	ENSG00000120656	TAF12	TRUE	TRUE	low_confidence	chr4	132270090	132270569	Other	chr4	132270056	132270236
chr1	28736673	28737043	ENSG00000198492	YTHDF2	TRUE	TRUE	high_confidence	chr4	132212086	132212320	Conserved	chr4	132212005	132212391
chr1	28736673	28737043	ENSG00000198492	YTHDF2	TRUE	TRUE	high_confidence	chr4	132211871	132212427	Conserved	chr4	132212005	132212391
chr1	28885019	28885220	ENSG00000159023	EPB41	TRUE	TRUE	high_confidence	chr4	132077601	132077798	Conserved	chr4	132076806	132076953
chr1	28885019	28885220	ENSG00000159023	EPB41	TRUE	TRUE	high_confidence	chr4	132076873	132076996	Conserved	chr4	132076806	132076953
chr1	28885019	28885220	ENSG00000159023	EPB41	TRUE	TRUE	high_confidence	chr4	132077573	132077811	Conserved	chr4	132076806	132076953
chr1	28885019	28885220	ENSG00000159023	EPB41	TRUE	TRUE	high_confidence	chr4	132076857	132077077	Conserved	chr4	132076806	132076953
chr1	28887079	28887195	ENSG00000159023	EPB41	TRUE	TRUE	low_confidence	chr4	132075220	132075541	Conserved	chr4	132075206	132075334
chr1	28915054	28915249	ENSG00000159023	EPB41	TRUE	TRUE	low_confidence	chr4	132049141	132049314	Conserved	chr4	132048395	132048588
chr1	28915054	28915249	ENSG00000159023	EPB41	TRUE	TRUE	low_confidence	chr4	132048417	132048683	Conserved	chr4	132048395	132048588
chr1	28926956	28927131	ENSG00000159023	EPB41	TRUE	TRUE	high_confidence	chr4	132040424	132040552	Conserved	chr4	132040372	132040544
chr1	28926956	28927131	ENSG00000159023	EPB41	TRUE	TRUE	high_confidence	chr4	132039565	132039859	Conserved	chr4	132040372	132040544
chr1	28926956	28927131	ENSG00000159023	EPB41	TRUE	TRUE	high_confidence	chr4	132040368	132040570	Conserved	chr4	132040372	132040544
chr1	28926956	28927131	ENSG00000159023	EPB41	TRUE	TRUE	high_confidence	chr4	132039544	132039929	Conserved	chr4	132040372	132040544
chr1	29181874	29182187	ENSG00000116350	SRSF4	TRUE	TRUE	low_confidence	chr4	131874343	131874570	Other	chr4	131873385	131873663
chr1	29181874	29182187	ENSG00000116350	SRSF4	TRUE	TRUE	low_confidence	chr4	131873954	131874106	Other	chr4	131873385	131873663
chr1	29181874	29182187	ENSG00000116350	SRSF4	TRUE	TRUE	low_confidence	chr4	131873291	131873647	Other	chr4	131873385	131873663
chr1	29230897	29231027	ENSG00000116353	MECR	TRUE	TRUE	low_confidence	chr4	131843376	131843560	Other	chr4	131843393	131843512
chr1	29718877	29719048	ENSG00000060656	PTPRU	TRUE	TRUE	no_overlap	NA	NA	NA	Other	NA	NA	NA
chr1	29777665	29777789	ENSG00000060656	PTPRU	TRUE	FALSE	no_overlap	NA	NA	NA	Other	NA	NA	NA
chr1	30191237	30191357	ENSG00000162510	MATN1	TRUE	TRUE	no_overlap	NA	NA	NA	Other	NA	NA	NA
chr1	30283320	30283408	ENSG00000162510	MATN1	TRUE	TRUE	no_overlap	NA	NA	NA	Other	NA	NA	NA
chr1	30743692	30743908	ENSG00000162511	LAPTM5	TRUE	TRUE	no_overlap	NA	NA	NA	Conserved	chr4	130924888	130925090
chr1	30744173	30744391	ENSG00000162511	LAPTM5	TRUE	TRUE	no_overlap	NA	NA	NA	Conserved	chr4	130924538	130924674
chr1	30745887	30745978	ENSG00000162511	LAPTM5	TRUE	FALSE	no_overlap	NA	NA	NA	Conserved	NA	NA	NA
chr1	30749946	30750108	ENSG00000162511	LAPTM5	TRUE	TRUE	no_overlap	NA	NA	NA	Conserved	NA	NA	NA
chr1	30756585	30757015	ENSG00000162511	LAPTM5	TRUE	TRUE	high_confidence	chr4	130914041	130914268	Conserved	chr4	130913901	130914259
chr1	30756585	30757015	ENSG00000162511	LAPTM5	TRUE	TRUE	high_confidence	chr4	130915214	130915336	Conserved	chr4	130913901	130914259
chr1	30756585	30757015	ENSG00000162511	LAPTM5	TRUE	TRUE	high_confidence	chr4	130914017	130914393	Conserved	chr4	130913901	130914259
chr1	30756585	30757015	ENSG00000162511	LAPTM5	TRUE	TRUE	high_confidence	chr4	130913274	130913417	Conserved	chr4	130913901	130914259
chr1	30757565	30757875	ENSG00000162511	LAPTM5	TRUE	TRUE	high_confidence	chr4	130914041	130914268	Conserved	chr4	130913224	130913536
chr1	30757565	30757875	ENSG00000162511	LAPTM5	TRUE	TRUE	high_confidence	chr4	130914017	130914393	Conserved	chr4	130913224	130913536
chr1	30757565	30757875	ENSG00000162511	LAPTM5	TRUE	TRUE	high_confidence	chr4	130913274	130913417	Conserved	chr4	130913224	130913536
chr1	30759807	30760045	ENSG00000162511	LAPTM5	TRUE	TRUE	high_confidence	chr4	130910806	130910911	Conserved	chr4	130910767	130910966
chr1	30759807	30760045	ENSG00000162511	LAPTM5	TRUE	TRUE	high_confidence	chr4	130910738	130910945	Conserved	chr4	130910767	130910966
chr1	31065704	31065903	ENSG00000134644	PUM1	TRUE	TRUE	low_confidence	chr4	130663602	130663837	Other	chr4	130663172	130663379
chr1	31065704	31065903	ENSG00000134644	PUM1	TRUE	TRUE	low_confidence	chr4	130663307	130663555	Other	chr4	130663172	130663379
chr1	31065704	31065903	ENSG00000134644	PUM1	TRUE	TRUE	low_confidence	chr4	130663059	130663269	Other	chr4	130663172	130663379
chr1	31699433	31699572	ENSG00000084636	COL16A1	TRUE	TRUE	no_overlap	NA	NA	NA	Conserved	chr4	130052138	130052240
chr1	31705321	31705434	ENSG00000084636	COL16A1	TRUE	TRUE	high_confidence	chr4	130045788	130045985	Conserved	chr4	130045806	130045917
chr1	31705321	31705434	ENSG00000084636	COL16A1	TRUE	TRUE	high_confidence	chr4	130045680	130046046	Conserved	chr4	130045806	130045917
chr1	31751123	31751270	ENSG00000121753	ADGRB2	TRUE	TRUE	no_overlap	NA	NA	NA	Other	chr4	129998244	129998372
chr1	31816108	31816201	ENSG00000134668	SPOCD1	TRUE	TRUE	low_confidence	chr4	129928469	129928713	Other	chr4	129928545	129928645
chr1	31827410	31827574	ENSG00000134668	SPOCD1	TRUE	TRUE	no_overlap	NA	NA	NA	Other	NA	NA	NA
chr1	31873034	31873186	ENSG00000184007	PTP4A2	TRUE	FALSE	no_overlap	NA	NA	NA	Conserved	NA	NA	NA
chr1	31926357	31926494	ENSG00000184007	PTP4A2	TRUE	TRUE	no_overlap	NA	NA	NA	Conserved	chr4	129831631	129831759
chr1	31928876	31929047	ENSG00000184007	PTP4A2	TRUE	TRUE	no_overlap	NA	NA	NA	Conserved	chr4	129829807	129829946
chr1	31938338	31938692	ENSG00000184007	PTP4A2	TRUE	TRUE	high_confidence	chr4	129819771	129820156	Conserved	chr4	129819876	129820237
chr1	31938338	31938692	ENSG00000184007	PTP4A2	TRUE	TRUE	high_confidence	chr4	129819711	129820236	Conserved	chr4	129819876	129820237
chr1	31940189	31940288	ENSG00000184007	PTP4A2	TRUE	TRUE	high_confidence	chr4	129818622	129818790	Conserved	chr4	129818505	129818606
chr1	31940189	31940288	ENSG00000184007	PTP4A2	TRUE	TRUE	high_confidence	chr4	129818606	129818860	Conserved	chr4	129818505	129818606
chr1	31943897	31944138	ENSG00000184007	PTP4A2	TRUE	TRUE	high_confidence	chr4	129810913	129811254	Conserved	chr4	129811443	129811692
chr1	31943897	31944138	ENSG00000184007	PTP4A2	TRUE	TRUE	high_confidence	chr4	129810838	129811652	Conserved	chr4	129811443	129811692
chr1	31944380	31944776	ENSG00000184007	PTP4A2	TRUE	TRUE	high_confidence	chr4	129810913	129811254	Conserved	chr4	129810891	129811211
chr1	31944380	31944776	ENSG00000184007	PTP4A2	TRUE	TRUE	high_confidence	chr4	129810838	129811652	Conserved	chr4	129810891	129811211
chr1	31950009	31950103	ENSG00000184007	PTP4A2	TRUE	TRUE	no_overlap	NA	NA	NA	Conserved	NA	NA	NA
chr1	31981486	31981635	ENSG00000121774	KHDRBS1	TRUE	TRUE	no_overlap	NA	NA	NA	Other	NA	NA	NA
chr1	31982133	31982329	ENSG00000121774	KHDRBS1	TRUE	TRUE	no_overlap	NA	NA	NA	Other	NA	NA	NA
chr1	32013504	32013641	ENSG00000121774	KHDRBS1	TRUE	TRUE	low_confidence	chr4	129742149	129742654	Other	chr4	129742491	129742639
chr1	32072925	32073033	ENSG00000121775	TMEM39B	TRUE	TRUE	low_confidence	chr4	129696635	129696984	Other	chr4	129696733	129696839
chr1	32179634	32179762	ENSG00000084652	TXLNA	TRUE	TRUE	low_confidence	chr4	129640558	129641258	Other	chr4	129640985	129641113
chr1	32179634	32179762	ENSG00000084652	TXLNA	TRUE	TRUE	low_confidence	chr4	129640098	129640207	Other	chr4	129640985	129641113
chr1	32196036	32196287	ENSG00000084652	TXLNA	TRUE	TRUE	no_overlap	NA	NA	NA	Other	chr4	129627907	129628149
chr1	32248681	32248838	ENSG00000183615	FAM167B	TRUE	TRUE	low_confidence	chr4	129577100	129577224	Other	chr4	129576885	129577012
chr1	32249985	32250243	ENSG00000182866	LCK	TRUE	TRUE	high_confidence	chr4	129575242	129575485	Conserved	chr4	129575341	129575632
chr1	32249985	32250243	ENSG00000182866	LCK	TRUE	TRUE	high_confidence	chr4	129573549	129573751	Conserved	chr4	129575341	129575632
chr1	32249985	32250243	ENSG00000182866	LCK	TRUE	TRUE	high_confidence	chr4	129575171	129575643	Conserved	chr4	129575341	129575632
chr1	32249985	32250243	ENSG00000182866	LCK	TRUE	TRUE	high_confidence	chr4	129573464	129573764	Conserved	chr4	129575341	129575632
chr1	32251145	32251335	ENSG00000182866	LCK	TRUE	TRUE	high_confidence	chr4	129575242	129575485	Conserved	chr4	129573550	129573739
chr1	32251145	32251335	ENSG00000182866	LCK	TRUE	TRUE	high_confidence	chr4	129573549	129573751	Conserved	chr4	129573550	129573739
chr1	32251145	32251335	ENSG00000182866	LCK	TRUE	TRUE	high_confidence	chr4	129575171	129575643	Conserved	chr4	129573550	129573739
chr1	32251145	32251335	ENSG00000182866	LCK	TRUE	TRUE	high_confidence	chr4	129573464	129573764	Conserved	chr4	129573550	129573739
chr1	32253591	32253801	ENSG00000182866	LCK	TRUE	TRUE	high_confidence	chr4	129571693	129571871	Conserved	chr4	129571680	129571877
chr1	32253591	32253801	ENSG00000182866	LCK	TRUE	TRUE	high_confidence	chr4	129571647	129571885	Conserved	chr4	129571680	129571877
chr1	32256565	32256655	ENSG00000182866	LCK	TRUE	TRUE	high_confidence	chr4	129570151	129570262	Conserved	NA	NA	NA
chr1	32256565	32256655	ENSG00000182866	LCK	TRUE	TRUE	high_confidence	chr4	129570019	129570302	Conserved	NA	NA	NA
chr1	32273933	32274147	ENSG00000182866	LCK	TRUE	TRUE	low_confidence	chr4	129558690	129558860	Conserved	chr4	129558365	129558567
chr1	32273933	32274147	ENSG00000182866	LCK	TRUE	TRUE	low_confidence	chr4	129558374	129558536	Conserved	chr4	129558365	129558567
chr1	32291819	32291974	ENSG00000116478	HDAC1	TRUE	TRUE	low_confidence	chr4	129542544	129543092	Other	chr4	129542811	129542964
chr1	32291819	32291974	ENSG00000116478	HDAC1	TRUE	TRUE	low_confidence	chr4	129541931	129542040	Other	chr4	129542811	129542964
chr1	32292630	32292718	ENSG00000116478	HDAC1	TRUE	TRUE	low_confidence	chr4	129542544	129543092	Other	chr4	129542099	129542200
chr1	32292630	32292718	ENSG00000116478	HDAC1	TRUE	TRUE	low_confidence	chr4	129541931	129542040	Other	chr4	129542099	129542200
chr1	32320029	32320378	ENSG00000116478	HDAC1	TRUE	TRUE	no_overlap	NA	NA	NA	Other	NA	NA	NA
chr1	32321941	32322282	ENSG00000116478	HDAC1	TRUE	TRUE	no_overlap	NA	NA	NA	Other	chr4	129525821	129526060
chr1	32335200	32335369	ENSG00000175130	MARCKSL1	TRUE	TRUE	low_confidence	chr4	129514444	129514824	Other	chr4	129514477	129514617
chr1	32335200	32335369	ENSG00000175130	MARCKSL1	TRUE	TRUE	low_confidence	chr4	129513599	129513728	Other	chr4	129514477	129514617
chr1	32335200	32335369	ENSG00000175130	MARCKSL1	TRUE	TRUE	low_confidence	chr4	129513250	129513551	Other	chr4	129514477	129514617
chr1	32336144	32336258	ENSG00000175130	MARCKSL1	TRUE	TRUE	low_confidence	chr4	129514444	129514824	Other	chr4	129513606	129513721
chr1	32336144	32336258	ENSG00000175130	MARCKSL1	TRUE	TRUE	low_confidence	chr4	129513599	129513728	Other	chr4	129513606	129513721
chr1	32336144	32336258	ENSG00000175130	MARCKSL1	TRUE	TRUE	low_confidence	chr4	129513250	129513551	Other	chr4	129513606	129513721
chr1	32337432	32337627	ENSG00000175130	MARCKSL1	TRUE	TRUE	low_confidence	chr4	129513250	129513551	Other	chr4	129512270	129512451
chr1	32337948	32338070	ENSG00000175130	MARCKSL1	TRUE	TRUE	no_overlap	NA	NA	NA	Other	chr4	129511902	129512025
chr1	32372241	32372424	ENSG00000160058	BSDC1	TRUE	TRUE	no_overlap	NA	NA	NA	Other	chr4	129481679	129481830
chr1	32650428	32650501	ENSG00000176261	ZBTB8OS	TRUE	TRUE	low_confidence	chr4	129335762	129336057	Other	chr4	129336071	129336144
chr1	32650428	32650501	ENSG00000176261	ZBTB8OS	TRUE	TRUE	low_confidence	chr4	129335075	129335714	Other	chr4	129336071	129336144
chr1	32650947	32651089	ENSG00000162521	RBBP4	TRUE	TRUE	low_confidence	chr4	129335762	129336057	Other	chr4	129335461	129335614
chr1	32650947	32651089	ENSG00000162521	RBBP4	TRUE	TRUE	low_confidence	chr4	129335075	129335714	Other	chr4	129335461	129335614
chr1	32798965	32799324	ENSG00000134684	YARS	TRUE	TRUE	no_overlap	NA	NA	NA	Hs-Specific	NA	NA	NA
chr1	32801189	32801358	ENSG00000134684	YARS	TRUE	FALSE	no_overlap	NA	NA	NA	Hs-Specific	NA	NA	NA
chr1	32817290	32817470	ENSG00000116497	S100PBP	TRUE	TRUE	low_confidence	chr4	129189526	129190026	Other	chr4	129189762	129189971
chr1	32817290	32817470	ENSG00000116497	S100PBP	TRUE	TRUE	low_confidence	chr4	129189252	129189434	Other	chr4	129189762	129189971
chr1	32817290	32817470	ENSG00000116497	S100PBP	TRUE	TRUE	low_confidence	chr4	129188910	129189026	Other	chr4	129189762	129189971
chr1	32818918	32819245	ENSG00000116497	S100PBP	TRUE	TRUE	low_confidence	chr4	129189252	129189434	Other	chr4	129188003	129188334
chr1	32818918	32819245	ENSG00000116497	S100PBP	TRUE	TRUE	low_confidence	chr4	129188910	129189026	Other	chr4	129188003	129188334
chr1	32917703	32917794	ENSG00000121900	TMEM54	TRUE	FALSE	no_overlap	NA	NA	NA	Other	NA	NA	NA
chr1	32963828	32963980	ENSG00000116514	RNF19B	TRUE	TRUE	low_confidence	chr4	129057946	129058315	Conserved	chr4	129058971	129059107
chr1	32964752	32964933	ENSG00000116514	RNF19B	TRUE	TRUE	low_confidence	chr4	129057946	129058315	Conserved	chr4	129058023	129058201
chr1	32981249	32981459	ENSG00000116514	RNF19B	TRUE	TRUE	no_overlap	NA	NA	NA	Conserved	chr4	129044149	129044334
chr1	33036862	33037115	ENSG00000004455	AK2	TRUE	TRUE	low_confidence	chr4	128992997	128993417	Alternate	chr4	128993048	128993310
chr1	33045856	33046105	ENSG00000004455	AK2	TRUE	TRUE	no_overlap	NA	NA	NA	Alternate	chr4	128983223	128983430
chr1	33098473	33098621	ENSG00000142920	AZIN2	TRUE	TRUE	no_overlap	NA	NA	NA	Other	NA	NA	NA
chr1	33099326	33099582	ENSG00000142920	AZIN2	TRUE	TRUE	no_overlap	NA	NA	NA	Other	chr4	128944772	128944919
chr1	33127216	33127421	ENSG00000142920	AZIN2	TRUE	TRUE	low_confidence	chr4	128925004	128925354	Other	chr4	128925094	128925328
chr1	33127480	33127670	ENSG00000142920	AZIN2	TRUE	TRUE	low_confidence	chr4	128925004	128925354	Other	chr4	128924896	128925068
chr1	33183318	33183437	ENSG00000116525	TRIM62	TRUE	TRUE	no_overlap	NA	NA	NA	Other	chr4	128881878	128881976
chr1	33256960	33256994	ENSG00000160094	ZNF362	TRUE	TRUE	high_confidence	chr4	128805034	128805219	Conserved	chr4	128805716	128805749
chr1	33256960	33256994	ENSG00000160094	ZNF362	TRUE	TRUE	high_confidence	chr4	128806130	128806239	Conserved	chr4	128805716	128805749
chr1	33256960	33256994	ENSG00000160094	ZNF362	TRUE	TRUE	high_confidence	chr4	128805000	128805230	Conserved	chr4	128805716	128805749
chr1	33295611	33295701	ENSG00000160094	ZNF362	TRUE	TRUE	low_confidence	chr4	128776882	128777118	Conserved	NA	NA	NA
chr1	33350325	33350488	ENSG00000134686	PHC2	TRUE	TRUE	low_confidence	chr4	128727449	128727668	Other	chr4	128727092	128727261
chr1	34859748	34859932	ENSG00000163866	SMIM12	TRUE	TRUE	low_confidence	chr4	127244179	127244319	Other	chr4	127243646	127243825
chr1	34859748	34859932	ENSG00000163866	SMIM12	TRUE	TRUE	low_confidence	chr4	127243534	127243958	Other	chr4	127243646	127243825
chr1	34866450	34866557	ENSG00000116544	DLGAP3	TRUE	TRUE	low_confidence	chr4	127236124	127236308	Other	chr4	127235882	127235986
chr1	34866450	34866557	ENSG00000116544	DLGAP3	TRUE	TRUE	low_confidence	chr4	127235821	127235999	Other	chr4	127235882	127235986
chr1	34968466	34968567	ENSG00000284773	AC114490.3	FALSE	FALSE	no_overlap	NA	NA	NA	Other	NA	NA	NA
chr1	35031658	35031776	ENSG00000163867	ZMYM6	TRUE	TRUE	high_confidence	chr4	127077310	127077425	Conserved	chr4	127077299	127077466
chr1	35031658	35031776	ENSG00000163867	ZMYM6	TRUE	TRUE	high_confidence	chr4	127076997	127077517	Conserved	chr4	127077299	127077466
chr1	35192082	35192216	ENSG00000116560	SFPQ	TRUE	TRUE	low_confidence	chr4	127022127	127022523	Other	chr4	127022226	127022383
chr1	35192082	35192216	ENSG00000116560	SFPQ	TRUE	TRUE	low_confidence	chr4	127021003	127021520	Other	chr4	127022226	127022383
chr1	35193078	35193217	ENSG00000116560	SFPQ	TRUE	TRUE	low_confidence	chr4	127022127	127022523	Other	chr4	127021250	127021388
chr1	35193078	35193217	ENSG00000116560	SFPQ	TRUE	TRUE	low_confidence	chr4	127021003	127021520	Other	chr4	127021250	127021388
chr1	35577756	35578006	ENSG00000116819	TFAP2E	TRUE	TRUE	no_overlap	NA	NA	NA	Hs-Specific	chr4	126732009	126732256
chr1	35641476	35641563	ENSG00000126067	PSMB2	TRUE	TRUE	high_confidence	chr4	126677536	126677667	Conserved	chr4	126677618	126677711
chr1	35641476	35641563	ENSG00000126067	PSMB2	TRUE	TRUE	high_confidence	chr4	126677362	126677777	Conserved	chr4	126677618	126677711
chr1	35769419	35769538	ENSG00000092853	CLSPN	TRUE	TRUE	low_confidence	chr4	126556708	126557430	Other	chr4	126557408	126557544
chr1	35811055	35811243	ENSG00000134698	AGO4	TRUE	TRUE	no_overlap	NA	NA	NA	Other	NA	NA	NA
chr1	35931071	35931325	ENSG00000126070	AGO3	TRUE	TRUE	low_confidence	chr4	126429331	126429865	Other	chr4	126429329	126429567
chr1	36088729	36088958	ENSG00000116863	ADPRHL2	TRUE	TRUE	high_confidence	chr4	126321718	126321858	Conserved	chr4	126321599	126321849
chr1	36088729	36088958	ENSG00000116863	ADPRHL2	TRUE	TRUE	high_confidence	chr4	126321527	126321913	Conserved	chr4	126321599	126321849
chr1	36149583	36149751	ENSG00000054116	TRAPPC3	TRUE	TRUE	high_confidence	chr4	126262117	126262262	Conserved	chr4	126262156	126262303
chr1	36149583	36149751	ENSG00000054116	TRAPPC3	TRUE	TRUE	high_confidence	chr4	126262080	126262534	Conserved	chr4	126262156	126262303
chr1	36155805	36155915	ENSG00000054116	TRAPPC3	TRUE	TRUE	low_confidence	chr4	126256236	126256675	Conserved	chr4	126256556	126256664
chr1	36156992	36157089	ENSG00000116871	MAP7D1	TRUE	TRUE	low_confidence	chr4	126256236	126256675	Other	chr4	126255395	126255482
chr1	36160941	36161118	ENSG00000116871	MAP7D1	TRUE	TRUE	no_overlap	NA	NA	NA	Other	chr4	126251801	126251944
chr1	36224110	36224300	ENSG00000054118	THRAP3	TRUE	TRUE	low_confidence	chr4	126204838	126204942	Other	chr4	126202779	126202994
chr1	36224110	36224300	ENSG00000054118	THRAP3	TRUE	TRUE	low_confidence	chr4	126202321	126203008	Other	chr4	126202779	126202994
chr1	36373893	36374064	ENSG00000196182	STK40	TRUE	TRUE	high_confidence	chr4	126110165	126110291	Conserved	chr4	126110905	126111069
chr1	36373893	36374064	ENSG00000196182	STK40	TRUE	TRUE	high_confidence	chr4	126110926	126111207	Conserved	chr4	126110905	126111069
chr1	36373893	36374064	ENSG00000196182	STK40	TRUE	TRUE	high_confidence	chr4	126110099	126110332	Conserved	chr4	126110905	126111069
chr1	36374517	36374612	ENSG00000196182	STK40	TRUE	TRUE	high_confidence	chr4	126110165	126110291	Conserved	chr4	126110485	126110580
chr1	36374517	36374612	ENSG00000196182	STK40	TRUE	TRUE	high_confidence	chr4	126110926	126111207	Conserved	chr4	126110485	126110580
chr1	36374517	36374612	ENSG00000196182	STK40	TRUE	TRUE	high_confidence	chr4	126110099	126110332	Conserved	chr4	126110485	126110580
chr1	36385848	36385939	ENSG00000196182	STK40	TRUE	TRUE	high_confidence	chr4	126103196	126103383	Conserved	chr4	126103940	126104022
chr1	36385848	36385939	ENSG00000196182	STK40	TRUE	TRUE	high_confidence	chr4	126103725	126104065	Conserved	chr4	126103940	126104022
chr1	36385848	36385939	ENSG00000196182	STK40	TRUE	TRUE	high_confidence	chr4	126103168	126103430	Conserved	chr4	126103940	126104022
chr1	36397840	36397973	ENSG00000181817	LSM10	TRUE	FALSE	no_overlap	NA	NA	NA	Other	NA	NA	NA
chr1	36420989	36421054	ENSG00000116885	OSCP1	TRUE	TRUE	low_confidence	chr4	126086062	126086319	Other	chr4	126086097	126086156
chr1	36464308	36464495	ENSG00000116898	MRPS15	TRUE	TRUE	high_confidence	chr4	126046833	126047014	Conserved	chr4	126046869	126047036
chr1	36464308	36464495	ENSG00000116898	MRPS15	TRUE	TRUE	high_confidence	chr4	126046813	126047200	Conserved	chr4	126046869	126047036
chr1	37473458	37473576	ENSG00000163874	ZC3H12A	TRUE	TRUE	low_confidence	chr4	125127744	125128081	Conserved	chr4	125128945	125129091
chr1	37474501	37474663	ENSG00000163874	ZC3H12A	TRUE	TRUE	low_confidence	chr4	125127744	125128081	Conserved	chr4	125127738	125127883
chr1	37477371	37477462	ENSG00000163874	ZC3H12A	TRUE	TRUE	high_confidence	chr4	125124783	125125080	Conserved	chr4	125124924	125125038
chr1	37477371	37477462	ENSG00000163874	ZC3H12A	TRUE	TRUE	high_confidence	chr4	125124744	125125112	Conserved	chr4	125124924	125125038
chr1	37479025	37479120	ENSG00000163874	ZC3H12A	TRUE	TRUE	low_confidence	chr4	125122714	125122867	Conserved	chr4	125123449	125123527
chr1	37479753	37480012	ENSG00000163874	ZC3H12A	TRUE	TRUE	low_confidence	chr4	125122714	125122867	Conserved	chr4	125122618	125122892
chr1	37554316	37554419	ENSG00000163877	SNIP1	TRUE	TRUE	low_confidence	chr4	125066434	125066791	Other	chr4	125066572	125066670
chr1	37595921	37596005	ENSG00000134697	GNL2	TRUE	TRUE	low_confidence	chr4	125029818	125030470	Other	chr4	125029974	125030043
chr1	37673940	37674150	ENSG00000116922	C1orf109	TRUE	TRUE	no_overlap	NA	NA	NA	Other	chr4	124952633	124952816
chr1	37990008	37990222	ENSG00000183431	SF3A3	TRUE	TRUE	low_confidence	chr4	124714584	124715044	Other	chr4	124714629	124714852
chr1	38009486	38009575	ENSG00000183520	UTP11	TRUE	TRUE	high_confidence	chr4	124695845	124696017	Conserved	chr4	124695897	124695986
chr1	38009486	38009575	ENSG00000183520	UTP11	TRUE	TRUE	high_confidence	chr4	124695743	124696074	Conserved	chr4	124695897	124695986
chr1	38028082	38028225	ENSG00000183520	UTP11	TRUE	TRUE	no_overlap	NA	NA	NA	Conserved	chr4	124673789	124673944
chr1	38030096	38030342	ENSG00000183520	UTP11	TRUE	TRUE	high_confidence	chr4	124671667	124671918	Conserved	chr4	124671660	124671879
chr1	38030096	38030342	ENSG00000183520	UTP11	TRUE	TRUE	high_confidence	chr4	124671636	124671976	Conserved	chr4	124671660	124671879
chr1	38559528	38559784	ENSG00000116954	RRAGC	TRUE	TRUE	no_overlap	NA	NA	NA	Conserved	chr4	124199209	124199444
chr1	38859724	38859843	ENSG00000116954	RRAGC	TRUE	TRUE	high_confidence	chr4	123917255	123917358	Conserved	chr4	123917360	123917469
chr1	38859724	38859843	ENSG00000116954	RRAGC	TRUE	TRUE	high_confidence	chr4	123917130	123917622	Conserved	chr4	123917360	123917469
chr1	38873450	38873502	ENSG00000274944	GJA9-MYCBP	FALSE	TRUE	low_confidence	chr4	123904625	123905153	Other	chr4	123904878	123904928
chr1	38873541	38873627	ENSG00000274944	GJA9-MYCBP	FALSE	TRUE	low_confidence	chr4	123904625	123905153	Other	chr4	123904754	123904837
chr1	38977694	38977843	ENSG00000174574	AKIRIN1	TRUE	FALSE	no_overlap	NA	NA	NA	Conserved	NA	NA	NA
chr1	38990933	38991063	ENSG00000174574	AKIRIN1	TRUE	TRUE	high_confidence	chr4	123750342	123750476	Conserved	chr4	123750471	123750579
chr1	38990933	38991063	ENSG00000174574	AKIRIN1	TRUE	TRUE	high_confidence	chr4	123750087	123750591	Conserved	chr4	123750471	123750579
chr1	38991118	38991322	ENSG00000174574	AKIRIN1	TRUE	TRUE	high_confidence	chr4	123750342	123750476	Conserved	chr4	123750226	123750431
chr1	38991118	38991322	ENSG00000174574	AKIRIN1	TRUE	TRUE	high_confidence	chr4	123750087	123750591	Conserved	chr4	123750226	123750431
chr1	39026258	39026367	ENSG00000168653	NDUFS5	TRUE	TRUE	low_confidence	chr4	123717935	123718447	Other	chr4	123718142	123718241
chr1	39196890	39197170	ENSG00000127603	MACF1	TRUE	TRUE	low_confidence	chr4	123577528	123577846	Alternate	chr4	123577556	123577836
chr1	39205293	39205418	ENSG00000127603	MACF1	TRUE	TRUE	low_confidence	chr4	123572935	123573156	Alternate	chr4	123572122	123572205
chr1	39205293	39205418	ENSG00000127603	MACF1	TRUE	TRUE	low_confidence	chr4	123572616	123572740	Alternate	chr4	123572122	123572205
chr1	39205293	39205418	ENSG00000127603	MACF1	TRUE	TRUE	low_confidence	chr4	123571902	123572027	Alternate	chr4	123572122	123572205
chr1	39394765	39394890	ENSG00000127603	MACF1	TRUE	TRUE	no_overlap	NA	NA	NA	Alternate	chr4	123426573	123426812
chr1	39525887	39526069	ENSG00000183682	BMP8A	FALSE	TRUE	no_overlap	NA	NA	NA	Other	chr4	123312984	123313177
chr1	39576880	39576975	ENSG00000090621	PABPC4	TRUE	TRUE	high_confidence	chr4	123282572	123282712	Conserved	chr4	123282599	123282696
chr1	39576880	39576975	ENSG00000090621	PABPC4	TRUE	TRUE	high_confidence	chr4	123282981	123283157	Conserved	chr4	123282599	123282696
chr1	39576880	39576975	ENSG00000090621	PABPC4	TRUE	TRUE	high_confidence	chr4	123282489	123282829	Conserved	chr4	123282599	123282696
chr1	39738839	39738927	ENSG00000084072	PPIE	TRUE	TRUE	low_confidence	chr4	123139741	123140080	Other	chr4	123139906	123139988
chr1	39738839	39738927	ENSG00000084072	PPIE	TRUE	TRUE	low_confidence	chr4	123139548	123139664	Other	chr4	123139906	123139988
chr1	39799318	39799471	ENSG00000116985	BMP8B	FALSE	TRUE	low_confidence	chr4	123082971	123083135	Other	chr4	123082540	123082685
chr1	40039884	40040125	ENSG00000131236	CAP1	TRUE	TRUE	high_confidence	chr4	122885862	122885981	Conserved	chr4	122886435	122886665
chr1	40039884	40040125	ENSG00000131236	CAP1	TRUE	TRUE	high_confidence	chr4	122885766	122886610	Conserved	chr4	122886435	122886665
chr1	40040589	40040843	ENSG00000131236	CAP1	TRUE	TRUE	high_confidence	chr4	122885862	122885981	Conserved	chr4	122885772	122886021
chr1	40040589	40040843	ENSG00000131236	CAP1	TRUE	TRUE	high_confidence	chr4	122885766	122886610	Conserved	chr4	122885772	122886021
chr1	40040589	40040843	ENSG00000131236	CAP1	TRUE	TRUE	high_confidence	chr4	122884936	122885123	Conserved	chr4	122885772	122886021
chr1	40059539	40059741	ENSG00000131236	CAP1	TRUE	TRUE	high_confidence	chr4	122872026	122872287	Conserved	chr4	122872065	122872250
chr1	40059539	40059741	ENSG00000131236	CAP1	TRUE	TRUE	high_confidence	chr4	122872011	122872350	Conserved	chr4	122872065	122872250
chr1	40097203	40097374	ENSG00000131238	PPT1	TRUE	TRUE	low_confidence	chr4	122835869	122836329	Other	chr4	122836079	122836291
chr1	40161238	40161439	ENSG00000117000	RLF	TRUE	TRUE	low_confidence	chr4	121214940	121215295	Alternate	chr4	121215026	121215237
chr1	40161238	40161439	ENSG00000117000	RLF	TRUE	TRUE	low_confidence	chr4	121214646	121214820	Alternate	chr4	121215026	121215237
chr1	40241923	40242026	ENSG00000117000	RLF	TRUE	TRUE	no_overlap	NA	NA	NA	Alternate	NA	NA	NA
chr1	40257929	40258284	ENSG00000084073	ZMPSTE24	TRUE	TRUE	low_confidence	chr4	121097880	121098397	Other	chr4	121097987	121098293
chr1	40315435	40315542	ENSG00000049089	COL9A2	TRUE	TRUE	low_confidence	chr4	121041070	121041227	Other	chr4	121041087	121041180
chr1	40373649	40373798	ENSG00000084070	SMAP2	TRUE	TRUE	low_confidence	chr4	121017087	121017338	Alternate	chr4	121017156	121017301
chr1	40373649	40373798	ENSG00000084070	SMAP2	TRUE	TRUE	low_confidence	chr4	121016033	121016651	Alternate	chr4	121017156	121017301
chr1	40374532	40374705	ENSG00000084070	SMAP2	TRUE	TRUE	low_confidence	chr4	121017087	121017338	Alternate	chr4	121016294	121016416
chr1	40374532	40374705	ENSG00000084070	SMAP2	TRUE	TRUE	low_confidence	chr4	121016033	121016651	Alternate	chr4	121016294	121016416
chr1	40381619	40381709	ENSG00000084070	SMAP2	TRUE	TRUE	no_overlap	NA	NA	NA	Alternate	chr4	121009706	121009789
chr1	40386085	40386177	ENSG00000084070	SMAP2	TRUE	TRUE	low_confidence	chr4	121004833	121004985	Alternate	chr4	121004243	121004312
chr1	40508665	40508811	ENSG00000164002	EXO5	TRUE	TRUE	low_confidence	chr4	120924672	120925285	Other	NA	NA	NA
chr1	40629757	40629808	ENSG00000117016	RIMS3	TRUE	TRUE	no_overlap	NA	NA	NA	Alternate	NA	NA	NA
chr1	41673413	41673629	ENSG00000127124	HIVEP3	TRUE	TRUE	no_overlap	NA	NA	NA	Conserved	chr4	120022206	120022422
chr1	41673943	41674094	ENSG00000127124	HIVEP3	TRUE	TRUE	no_overlap	NA	NA	NA	Conserved	chr4	120021284	120021381
chr1	41679715	41679877	ENSG00000127124	HIVEP3	TRUE	TRUE	no_overlap	NA	NA	NA	Conserved	chr4	120016282	120016441
chr1	41683359	41683467	ENSG00000127124	HIVEP3	TRUE	TRUE	no_overlap	NA	NA	NA	Conserved	chr4	120013046	120013133
chr1	41683909	41684356	ENSG00000127124	HIVEP3	TRUE	TRUE	no_overlap	NA	NA	NA	Conserved	chr4	120011947	120012397
chr1	41727474	41727686	ENSG00000127124	HIVEP3	TRUE	TRUE	no_overlap	NA	NA	NA	Conserved	chr4	119977906	119978124
chr1	41728779	41728892	ENSG00000127124	HIVEP3	TRUE	TRUE	no_overlap	NA	NA	NA	Conserved	chr4	119976694	119976886
chr1	41741065	41741129	ENSG00000127124	HIVEP3	TRUE	TRUE	low_confidence	chr4	119964872	119965283	Conserved	chr4	119965285	119965350
chr1	41751360	41751629	ENSG00000127124	HIVEP3	TRUE	TRUE	high_confidence	chr4	119959376	119959633	Conserved	chr4	119959343	119959625
chr1	41751360	41751629	ENSG00000127124	HIVEP3	TRUE	TRUE	high_confidence	chr4	119959341	119959743	Conserved	chr4	119959343	119959625
chr1	41791728	41791933	ENSG00000127124	HIVEP3	TRUE	TRUE	high_confidence	chr4	119922988	119923419	Conserved	chr4	119922484	119922516
chr1	41791728	41791933	ENSG00000127124	HIVEP3	TRUE	TRUE	high_confidence	chr4	119922955	119923513	Conserved	chr4	119922484	119922516
chr1	41803093	41803309	ENSG00000127124	HIVEP3	TRUE	TRUE	no_overlap	NA	NA	NA	Conserved	chr4	119911623	119911830
chr1	41891464	41891576	ENSG00000127124	HIVEP3	TRUE	TRUE	no_overlap	NA	NA	NA	Conserved	chr4	119836588	119836678
chr1	41892351	41892500	ENSG00000127124	HIVEP3	TRUE	TRUE	no_overlap	NA	NA	NA	Conserved	chr4	119835714	119835868
chr1	41898261	41898397	ENSG00000127124	HIVEP3	TRUE	FALSE	no_overlap	NA	NA	NA	Conserved	NA	NA	NA
chr1	41914617	41914789	ENSG00000127124	HIVEP3	TRUE	TRUE	no_overlap	NA	NA	NA	Conserved	chr4	119819897	119820085
chr1	41981446	41981540	ENSG00000127124	HIVEP3	TRUE	TRUE	no_overlap	NA	NA	NA	Conserved	NA	NA	NA
chr1	42335172	42335524	ENSG00000198815	FOXJ3	TRUE	TRUE	high_confidence	chr4	119539438	119539650	Conserved	chr4	119539409	119539733
chr1	42335172	42335524	ENSG00000198815	FOXJ3	TRUE	TRUE	high_confidence	chr4	119540460	119540587	Conserved	chr4	119539409	119539733
chr1	42335172	42335524	ENSG00000198815	FOXJ3	TRUE	TRUE	high_confidence	chr4	119539375	119539700	Conserved	chr4	119539409	119539733
chr1	42335172	42335524	ENSG00000198815	FOXJ3	TRUE	TRUE	high_confidence	chr4	119539111	119539226	Conserved	chr4	119539409	119539733
chr1	42456472	42456586	ENSG00000127125	PPCS	TRUE	TRUE	low_confidence	chr4	119422781	119423022	Other	chr4	119422333	119422458
chr1	42456472	42456586	ENSG00000127125	PPCS	TRUE	TRUE	low_confidence	chr4	119422089	119422560	Other	chr4	119422333	119422458
chr1	42658221	42658447	ENSG00000171960	PPIH	TRUE	TRUE	low_confidence	chr4	119320281	119320791	Other	chr4	119320474	119320660
chr1	42846359	42846449	ENSG00000164011	ZNF691	TRUE	TRUE	low_confidence	chr4	119173849	119174435	Other	chr4	119174361	119174414
chr1	42846359	42846449	ENSG00000164011	ZNF691	TRUE	TRUE	low_confidence	chr4	119173417	119173696	Other	chr4	119174361	119174414
chr1	42923088	42923180	ENSG00000117394	SLC2A1	TRUE	TRUE	low_confidence	chr4	119140194	119140475	Conserved	chr4	119140305	119140375
chr1	42931242	42931569	ENSG00000117394	SLC2A1	TRUE	TRUE	no_overlap	NA	NA	NA	Conserved	chr4	119131984	119132096
chr1	42931877	42932448	ENSG00000117394	SLC2A1	TRUE	TRUE	no_overlap	NA	NA	NA	Conserved	chr4	119131308	119131878
chr1	42936699	42936866	ENSG00000117394	SLC2A1	TRUE	TRUE	high_confidence	chr4	119125994	119126226	Conserved	chr4	119126053	119126212
chr1	42936699	42936866	ENSG00000117394	SLC2A1	TRUE	TRUE	high_confidence	chr4	119125617	119125797	Conserved	chr4	119126053	119126212
chr1	42936699	42936866	ENSG00000117394	SLC2A1	TRUE	TRUE	high_confidence	chr4	119125854	119126263	Conserved	chr4	119126053	119126212
chr1	42936699	42936866	ENSG00000117394	SLC2A1	TRUE	TRUE	high_confidence	chr4	119125563	119125836	Conserved	chr4	119126053	119126212
chr1	42937261	42937484	ENSG00000117394	SLC2A1	TRUE	TRUE	high_confidence	chr4	119125994	119126226	Conserved	chr4	119125503	119125761
chr1	42937261	42937484	ENSG00000117394	SLC2A1	TRUE	TRUE	high_confidence	chr4	119125617	119125797	Conserved	chr4	119125503	119125761
chr1	42937261	42937484	ENSG00000117394	SLC2A1	TRUE	TRUE	high_confidence	chr4	119125854	119126263	Conserved	chr4	119125503	119125761
chr1	42937261	42937484	ENSG00000117394	SLC2A1	TRUE	TRUE	high_confidence	chr4	119125563	119125836	Conserved	chr4	119125503	119125761
chr1	42940950	42941030	ENSG00000117394	SLC2A1	TRUE	TRUE	no_overlap	NA	NA	NA	Conserved	chr4	119122480	119122538
chr1	42951737	42951920	ENSG00000117394	SLC2A1	TRUE	TRUE	no_overlap	NA	NA	NA	Conserved	chr4	119114122	119114252
chr1	42952556	42952748	ENSG00000117394	SLC2A1	TRUE	TRUE	no_overlap	NA	NA	NA	Conserved	chr4	119113494	119113626
chr1	42958948	42959137	ENSG00000117394	SLC2A1	TRUE	TRUE	high_confidence	chr4	119108779	119108891	Conserved	chr4	119108548	119108738
chr1	42958948	42959137	ENSG00000117394	SLC2A1	TRUE	TRUE	high_confidence	chr4	119108551	119109170	Conserved	chr4	119108548	119108738
chr1	43367953	43368226	ENSG00000066322	ELOVL1	TRUE	TRUE	low_confidence	chr4	118428653	118428894	Other	chr4	118427898	118428177
chr1	43367953	43368226	ENSG00000066322	ELOVL1	TRUE	TRUE	low_confidence	chr4	118428126	118428490	Other	chr4	118427898	118428177
chr1	43367953	43368226	ENSG00000066322	ELOVL1	TRUE	TRUE	low_confidence	chr4	118427896	118428070	Other	chr4	118427898	118428177
chr1	43453932	43454046	ENSG00000178922	HYI	TRUE	TRUE	low_confidence	chr4	118359705	118360227	Other	chr4	118359910	118360002
chr1	43946512	43946669	ENSG00000117408	IPO13	TRUE	TRUE	low_confidence	chr4	117914972	117915372	Other	chr4	117915292	117915434
chr1	43946775	43946909	ENSG00000117408	IPO13	TRUE	TRUE	low_confidence	chr4	117914972	117915372	Other	chr4	117915051	117915185
chr1	43974514	43974595	ENSG00000117410	ATP6V0B	TRUE	TRUE	low_confidence	chr4	117887257	117887596	Other	chr4	117887580	117887650
chr1	43974780	43974936	ENSG00000117410	ATP6V0B	TRUE	TRUE	low_confidence	chr4	117887257	117887596	Other	chr4	117887332	117887461
chr1	44213341	44213459	ENSG00000178028	DMAP1	TRUE	TRUE	low_confidence	chr4	117682021	117682401	Other	chr4	117682247	117682374
chr1	44721606	44721955	ENSG00000198520	ARMH1	TRUE	FALSE	no_overlap	NA	NA	NA	Other	NA	NA	NA
chr1	44730608	44731071	ENSG00000198520	ARMH1	TRUE	TRUE	low_confidence	chr4	117210456	117210951	Other	chr4	117210943	117210990
chr1	44739698	44739866	ENSG00000142945	KIF2C	TRUE	TRUE	low_confidence	chr4	117182544	117182769	Other	chr4	117182563	117182687
chr1	44775439	44775620	ENSG00000142937	RPS8	TRUE	TRUE	low_confidence	chr4	117155901	117156329	Other	chr4	117156038	117156199
chr1	44800120	44800243	ENSG00000173846	PLK3	TRUE	TRUE	low_confidence	chr4	117133810	117134300	Other	chr4	117134096	117134199
chr1	44807805	44807981	ENSG00000222009	BTBD19	TRUE	TRUE	high_confidence	chr4	117125903	117126125	Conserved	chr4	117126173	117126338
chr1	44807805	44807981	ENSG00000222009	BTBD19	TRUE	TRUE	high_confidence	chr4	117125818	117126367	Conserved	chr4	117126173	117126338
chr1	44809663	44809777	ENSG00000222009	BTBD19	TRUE	TRUE	high_confidence	chr4	117124460	117124667	Conserved	chr4	117124516	117124628
chr1	44809663	44809777	ENSG00000222009	BTBD19	TRUE	TRUE	high_confidence	chr4	117124821	117124955	Conserved	chr4	117124516	117124628
chr1	44809663	44809777	ENSG00000222009	BTBD19	TRUE	TRUE	high_confidence	chr4	117124432	117124734	Conserved	chr4	117124516	117124628
chr1	44819592	44820064	ENSG00000117425	PTCH2	TRUE	TRUE	no_overlap	NA	NA	NA	Other	NA	NA	NA
chr1	44986538	44986693	ENSG00000070785	EIF2B3	TRUE	TRUE	low_confidence	chr4	117019212	117019750	Other	chr4	117019333	117019483
chr1	45011261	45011371	ENSG00000126107	HECTD3	TRUE	TRUE	low_confidence	chr4	116995956	116996141	Other	chr4	116995289	116995399
chr1	45011261	45011371	ENSG00000126107	HECTD3	TRUE	TRUE	low_confidence	chr4	116994379	116994594	Other	chr4	116995289	116995399
chr1	45012078	45012181	ENSG00000126088	UROD	TRUE	TRUE	low_confidence	chr4	116994379	116994594	Other	chr4	116994424	116994525
chr1	45521748	45522025	ENSG00000117450	PRDX1	TRUE	TRUE	low_confidence	chr4	116685354	116686024	Other	chr4	116685466	116685731
chr1	45543878	45544097	ENSG00000117448	AKR1A1	TRUE	TRUE	high_confidence	chr4	116668321	116668475	Conserved	chr4	116668348	116668888
chr1	45543878	45544097	ENSG00000117448	AKR1A1	TRUE	TRUE	high_confidence	chr4	116668195	116668560	Conserved	chr4	116668348	116668888
chr1	45687101	45687271	ENSG00000159596	TMEM69	TRUE	TRUE	low_confidence	chr4	116557389	116557709	Other	chr4	116556958	116557148
chr1	45687101	45687271	ENSG00000159596	TMEM69	TRUE	TRUE	low_confidence	chr4	116557015	116557251	Other	chr4	116556958	116557148
chr1	45687101	45687271	ENSG00000159596	TMEM69	TRUE	TRUE	low_confidence	chr4	116555819	116556017	Other	chr4	116556958	116557148
chr1	45750571	45750839	ENSG00000197429	IPP	TRUE	TRUE	low_confidence	chr4	116507302	116507849	Other	chr4	116507488	116507677
chr1	46132680	46132834	ENSG00000278139	AL358075.4	FALSE	TRUE	low_confidence	chr4	116221141	116221727	Other	chr4	116221433	116221590
chr1	46132680	46132834	ENSG00000278139	AL358075.4	FALSE	TRUE	low_confidence	chr4	116220961	116221070	Other	chr4	116221433	116221590
chr1	46247556	46247773	ENSG00000085999	RAD54L	TRUE	TRUE	low_confidence	chr4	116123544	116123892	Other	chr4	116123671	116123865
chr1	46303210	46303410	ENSG00000132128	LRRC41	TRUE	TRUE	low_confidence	chr4	116074921	116075541	Other	chr4	116075321	116075521
chr1	46340687	46340835	ENSG00000117481	NSUN4	TRUE	TRUE	high_confidence	chr4	116053769	116053872	Conserved	chr4	116053768	116053910
chr1	46340687	46340835	ENSG00000117481	NSUN4	TRUE	TRUE	high_confidence	chr4	116053326	116054001	Conserved	chr4	116053768	116053910
chr1	46340687	46340835	ENSG00000117481	NSUN4	TRUE	TRUE	high_confidence	chr4	116052863	116053012	Conserved	chr4	116053768	116053910
chr1	46595330	46595477	ENSG00000079277	MKNK1	TRUE	TRUE	no_overlap	NA	NA	NA	Other	chr4	115847039	115847581
chr1	46604155	46604267	ENSG00000079277	MKNK1	TRUE	TRUE	low_confidence	chr4	115838937	115839319	Other	chr4	115839203	115839310
chr1	46605389	46605484	ENSG00000079277	MKNK1	TRUE	TRUE	low_confidence	chr4	115838937	115839319	Other	chr4	115837789	115837872
chr1	46616370	46616488	ENSG00000142961	MOB3C	TRUE	TRUE	low_confidence	chr4	115827927	115828578	Other	chr4	115828438	115828561
chr1	46668324	46668477	ENSG00000123472	ATPAF1	TRUE	TRUE	low_confidence	chr4	115784880	115785094	Other	chr4	115784909	115785049
chr1	46719101	46719340	ENSG00000159658	EFCAB14	TRUE	TRUE	low_confidence	chr4	115737517	115738116	Other	chr4	115737543	115737782
chr1	47333681	47333819	ENSG00000162368	CMPK1	TRUE	TRUE	low_confidence	chr4	114986950	114987389	Other	chr4	114987227	114987317
chr1	47333681	47333819	ENSG00000162368	CMPK1	TRUE	TRUE	low_confidence	chr4	114986546	114986826	Other	chr4	114987227	114987317
chr1	47436577	47436672	ENSG00000186564	FOXD2	TRUE	TRUE	low_confidence	chr4	114910196	114910336	Other	chr4	114910220	114910313
chr1	47436577	47436672	ENSG00000186564	FOXD2	TRUE	TRUE	low_confidence	chr4	114909334	114909473	Other	chr4	114910220	114910313
chr1	47437632	47437824	ENSG00000186564	FOXD2	TRUE	TRUE	low_confidence	chr4	114910196	114910336	Other	chr4	114909126	114909320
chr1	47437632	47437824	ENSG00000186564	FOXD2	TRUE	TRUE	low_confidence	chr4	114909334	114909473	Other	chr4	114909126	114909320
chr1	47437632	47437824	ENSG00000186564	FOXD2	TRUE	TRUE	low_confidence	chr4	114908855	114909131	Other	chr4	114909126	114909320
chr1	47437632	47437824	ENSG00000186564	FOXD2	TRUE	TRUE	low_confidence	chr4	114908046	114908183	Other	chr4	114909126	114909320
chr1	47437884	47438022	ENSG00000186564	FOXD2	TRUE	TRUE	low_confidence	chr4	114909334	114909473	Other	chr4	114908959	114909073
chr1	47437884	47438022	ENSG00000186564	FOXD2	TRUE	TRUE	low_confidence	chr4	114908855	114909131	Other	chr4	114908959	114909073
chr1	47437884	47438022	ENSG00000186564	FOXD2	TRUE	TRUE	low_confidence	chr4	114908046	114908183	Other	chr4	114908959	114909073
chr1	48576762	48576932	ENSG00000186094	AGBL4	TRUE	TRUE	no_overlap	NA	NA	NA	Other	chr4	111623613	111623747
chr1	50960083	50960345	ENSG00000185104	FAF1	TRUE	TRUE	high_confidence	chr4	109676485	109676669	Conserved	chr4	109676506	109676769
chr1	50960083	50960345	ENSG00000185104	FAF1	TRUE	TRUE	high_confidence	chr4	109676351	109676817	Conserved	chr4	109676506	109676769
chr1	50968570	50968743	ENSG00000123080	CDKN2C	TRUE	TRUE	low_confidence	chr4	109667082	109667273	Other	chr4	109666710	109666877
chr1	50968570	50968743	ENSG00000123080	CDKN2C	TRUE	TRUE	low_confidence	chr4	109666680	109666941	Other	chr4	109666710	109666877
chr1	50968570	50968743	ENSG00000123080	CDKN2C	TRUE	TRUE	low_confidence	chr4	109666031	109666221	Other	chr4	109666710	109666877
chr1	51519409	51519533	ENSG00000085832	EPS15	TRUE	TRUE	high_confidence	chr4	109280106	109280222	Conserved	chr4	109280131	109280243
chr1	51519409	51519533	ENSG00000085832	EPS15	TRUE	TRUE	high_confidence	chr4	109280639	109280766	Conserved	chr4	109280131	109280243
chr1	51519409	51519533	ENSG00000085832	EPS15	TRUE	TRUE	high_confidence	chr4	109280069	109280438	Conserved	chr4	109280131	109280243
chr1	51878657	51878820	ENSG00000078618	NRDC	TRUE	TRUE	low_confidence	chr4	109000091	109001080	Other	chr4	109000596	109000791
chr1	51878885	51879046	ENSG00000078618	NRDC	TRUE	TRUE	low_confidence	chr4	109000091	109001080	Other	chr4	109000385	109000531
chr1	52056381	52056549	ENSG00000134717	BTF3L4	FALSE	TRUE	low_confidence	chr4	108834417	108834603	Other	chr4	108833338	108833506
chr1	52056381	52056549	ENSG00000134717	BTF3L4	FALSE	TRUE	low_confidence	chr4	108833511	108834055	Other	chr4	108833338	108833506
chr1	52056381	52056549	ENSG00000134717	BTF3L4	FALSE	TRUE	low_confidence	chr4	108833331	108833454	Other	chr4	108833338	108833506
chr1	52056818	52057055	ENSG00000134717	BTF3L4	FALSE	TRUE	low_confidence	chr4	108833511	108834055	Other	chr4	108832858	108833101
chr1	52056818	52057055	ENSG00000134717	BTF3L4	FALSE	TRUE	low_confidence	chr4	108833331	108833454	Other	chr4	108832858	108833101
chr1	52366051	52366262	ENSG00000154222	CC2D1B	TRUE	TRUE	low_confidence	chr4	108619655	108620293	Other	chr4	108619873	108620091
chr1	52404440	52404548	ENSG00000085840	ORC1	TRUE	TRUE	high_confidence	chr4	108579344	108579447	Conserved	chr4	108579335	108579429
chr1	52404440	52404548	ENSG00000085840	ORC1	TRUE	TRUE	high_confidence	chr4	108578987	108579771	Conserved	chr4	108579335	108579429
chr1	52553587	52553629	ENSG00000134744	TUT4	TRUE	TRUE	low_confidence	chr4	108460119	108460228	Other	chr4	108459412	108459446
chr1	52553587	52553629	ENSG00000134744	TUT4	TRUE	TRUE	low_confidence	chr4	108459278	108459397	Other	chr4	108459412	108459446
chr1	52553587	52553629	ENSG00000134744	TUT4	TRUE	TRUE	low_confidence	chr4	108458626	108458764	Other	chr4	108459412	108459446
chr1	52635696	52635801	ENSG00000182183	SHISAL2A	TRUE	TRUE	no_overlap	NA	NA	NA	Alternate	NA	NA	NA
chr1	52637238	52637390	ENSG00000182183	SHISAL2A	TRUE	TRUE	low_confidence	chr4	108380336	108380534	Alternate	chr4	108379829	108380099
chr1	52637507	52637714	ENSG00000182183	SHISAL2A	TRUE	TRUE	low_confidence	chr4	108380336	108380534	Alternate	chr4	108379462	108379712
chr1	52726420	52726557	ENSG00000162378	ZYG11B	TRUE	TRUE	low_confidence	chr4	108300898	108301187	Other	chr4	108301018	108301144
chr1	53014882	53015003	ENSG00000116171	SCP2	TRUE	TRUE	high_confidence	chr4	108071351	108071502	Conserved	chr4	108071297	108071418
chr1	53014882	53015003	ENSG00000116171	SCP2	TRUE	TRUE	high_confidence	chr4	108071239	108071691	Conserved	chr4	108071297	108071418
chr1	53220226	53220371	ENSG00000162384	C1orf123	TRUE	TRUE	high_confidence	chr4	107890121	107890225	Conserved	chr4	107890089	107890279
chr1	53220226	53220371	ENSG00000162384	C1orf123	TRUE	TRUE	high_confidence	chr4	107889729	107890284	Conserved	chr4	107890089	107890279
chr1	53238498	53238607	ENSG00000162385	MAGOH	TRUE	TRUE	low_confidence	chr4	107879603	107880053	Other	chr4	107879713	107879809
chr1	53326020	53326244	ENSG00000157193	LRP8	TRUE	TRUE	high_confidence	chr4	107803933	107804049	Conserved	chr4	107803882	107804103
chr1	53326020	53326244	ENSG00000157193	LRP8	TRUE	TRUE	high_confidence	chr4	107803755	107804168	Conserved	chr4	107803882	107804103
chr1	53326020	53326244	ENSG00000157193	LRP8	TRUE	TRUE	high_confidence	chr4	107803506	107803719	Conserved	chr4	107803882	107804103
chr1	53413299	53413522	ENSG00000143006	DMRTB1	TRUE	TRUE	no_overlap	NA	NA	NA	Other	chr4	107720158	107720411
chr1	53413683	53413805	ENSG00000143006	DMRTB1	TRUE	TRUE	no_overlap	NA	NA	NA	Other	NA	NA	NA
chr1	53582244	53582354	ENSG00000174332	GLIS1	TRUE	TRUE	no_overlap	NA	NA	NA	Other	chr4	107578379	107578476
chr1	53585255	53585404	ENSG00000174332	GLIS1	TRUE	TRUE	no_overlap	NA	NA	NA	Other	chr4	107575794	107575912
chr1	53600554	53600739	ENSG00000174332	GLIS1	TRUE	TRUE	no_overlap	NA	NA	NA	Other	chr4	107563413	107563625
chr1	53765833	53766004	ENSG00000058804	NDC1	TRUE	TRUE	no_overlap	NA	NA	NA	Other	chr4	107415878	107416027
chr1	53838504	53838695	ENSG00000058804	NDC1	TRUE	TRUE	low_confidence	chr4	107367644	107368190	Other	chr4	107367696	107367846
chr1	53889798	53889904	ENSG00000058799	YIPF1	TRUE	TRUE	low_confidence	chr4	107314198	107314446	Other	chr4	107314254	107314381
chr1	53945632	53945790	ENSG00000081870	HSPB11	TRUE	TRUE	low_confidence	chr4	107253872	107254041	Other	chr4	107253871	107253941
chr1	53945632	53945790	ENSG00000081870	HSPB11	TRUE	TRUE	low_confidence	chr4	107253596	107253804	Other	chr4	107253871	107253941
chr1	53945632	53945790	ENSG00000081870	HSPB11	TRUE	TRUE	low_confidence	chr4	107253063	107253348	Other	chr4	107253871	107253941
chr1	54053292	54053629	ENSG00000116205	TCEANC2	TRUE	TRUE	high_confidence	chr4	107179280	107179497	Other	chr4	107178345	107178627
chr1	54053292	54053629	ENSG00000116205	TCEANC2	TRUE	TRUE	high_confidence	chr4	107179194	107179519	Other	chr4	107178345	107178627
chr1	54053292	54053629	ENSG00000116205	TCEANC2	TRUE	TRUE	high_confidence	chr4	107178137	107179113	Other	chr4	107178345	107178627
chr1	54231176	54231292	ENSG00000157216	SSBP3	TRUE	TRUE	no_overlap	NA	NA	NA	Other	NA	NA	NA
chr1	54380578	54380788	ENSG00000157216	SSBP3	TRUE	TRUE	low_confidence	chr4	106935553	106935764	Other	chr4	106935212	106935432
chr1	54380578	54380788	ENSG00000157216	SSBP3	TRUE	TRUE	low_confidence	chr4	106935184	106935484	Other	chr4	106935212	106935432
chr1	54406379	54406470	ENSG00000157216	SSBP3	TRUE	TRUE	low_confidence	chr4	106911309	106911738	Other	chr4	106911421	106911507
chr1	54406379	54406470	ENSG00000157216	SSBP3	TRUE	TRUE	low_confidence	chr4	106910218	106910639	Other	chr4	106911421	106911507
chr1	54407651	54407860	ENSG00000157216	SSBP3	TRUE	TRUE	low_confidence	chr4	106910218	106910639	Other	chr4	106910215	106910409
chr1	54407651	54407860	ENSG00000157216	SSBP3	TRUE	TRUE	low_confidence	chr4	106909133	106909362	Other	chr4	106910215	106910409
chr1	54481335	54481457	ENSG00000162390	ACOT11	TRUE	TRUE	no_overlap	NA	NA	NA	Other	chr4	106847521	106847616
chr1	54488242	54488566	ENSG00000162390	ACOT11	TRUE	TRUE	low_confidence	chr4	106840024	106840137	Other	chr4	106839995	106840338
chr1	54488242	54488566	ENSG00000162390	ACOT11	TRUE	TRUE	low_confidence	chr4	106838918	106839109	Other	chr4	106839995	106840338
chr1	54542106	54542234	ENSG00000162390	ACOT11	TRUE	TRUE	low_confidence	chr4	106804402	106804541	Other	chr4	106805165	106805329
chr1	54715731	54715930	ENSG00000243725	TTC4	TRUE	TRUE	low_confidence	chr4	106678711	106679164	Other	chr4	106678842	106679052
chr1	54801567	54801674	ENSG00000006555	TTC22	TRUE	TRUE	no_overlap	NA	NA	NA	Hs-Specific	chr4	106622108	106622215
chr1	54807321	54807604	ENSG00000162398	LEXM	TRUE	TRUE	low_confidence	chr4	106615791	106615952	Other	chr4	106615425	106615680
chr1	54887067	54887223	ENSG00000116133	DHCR24	TRUE	TRUE	low_confidence	chr4	106560749	106561593	Other	chr4	106561061	106561219
chr1	55128169	55128224	ENSG00000162402	USP24	TRUE	TRUE	no_overlap	NA	NA	NA	Other	NA	NA	NA
chr1	55140701	55140833	ENSG00000162402	USP24	TRUE	TRUE	low_confidence	chr4	106376034	106376155	Other	NA	NA	NA
chr1	55215361	55215478	ENSG00000162402	USP24	TRUE	TRUE	low_confidence	chr4	106316549	106316802	Other	chr4	106316111	106316226
chr1	55215361	55215478	ENSG00000162402	USP24	TRUE	TRUE	low_confidence	chr4	106315787	106316338	Other	chr4	106316111	106316226
chr1	55277657	55277753	ENSG00000162402	USP24	TRUE	TRUE	low_confidence	chr4	106228614	106228768	Other	chr4	106228680	106228776
chr1	58546753	58546872	ENSG00000162600	OMA1	TRUE	TRUE	low_confidence	chr4	103313602	103314171	Other	chr4	103313693	103313806
chr1	58718206	58718355	ENSG00000162601	MYSM1	TRUE	TRUE	no_overlap	NA	NA	NA	Other	NA	NA	NA
chr1	58754846	58755180	ENSG00000177606	JUN	TRUE	TRUE	low_confidence	chr4	95026198	95026315	Conserved	chr4	95025358	95025637
chr1	58755615	58755834	ENSG00000177606	JUN	TRUE	TRUE	low_confidence	chr4	95026198	95026315	Conserved	chr4	95026032	95026242
chr1	58784232	58784385	ENSG00000177606	JUN	TRUE	TRUE	high_confidence	chr4	95052331	95052428	Conserved	chr4	95052385	95052540
chr1	58784232	58784385	ENSG00000177606	JUN	TRUE	TRUE	high_confidence	chr4	95052065	95052853	Conserved	chr4	95052385	95052540
chr1	58784232	58784385	ENSG00000177606	JUN	TRUE	TRUE	high_confidence	chr4	95053177	95053476	Conserved	chr4	95052385	95052540
chr1	58815311	58815487	ENSG00000177606	JUN	TRUE	TRUE	no_overlap	NA	NA	NA	Conserved	chr4	95076535	95076682
chr1	58816215	58816572	ENSG00000177606	JUN	TRUE	TRUE	no_overlap	NA	NA	NA	Conserved	NA	NA	NA
chr1	58858372	58858498	ENSG00000177606	JUN	TRUE	TRUE	no_overlap	NA	NA	NA	Conserved	chr4	95120008	95120251
chr1	58886067	58886280	ENSG00000177606	JUN	TRUE	TRUE	no_overlap	NA	NA	NA	Conserved	chr4	95144487	95144698
chr1	58933008	58933095	ENSG00000177606	JUN	TRUE	TRUE	no_overlap	NA	NA	NA	Conserved	chr4	95191403	95191454
chr1	58941783	58942075	ENSG00000177606	JUN	TRUE	TRUE	low_confidence	chr4	95196371	95196477	Conserved	chr4	95196232	95196521
chr1	58969489	58969646	ENSG00000177606	JUN	TRUE	TRUE	no_overlap	NA	NA	NA	Conserved	NA	NA	NA
chr1	59005636	59005784	ENSG00000177606	JUN	TRUE	FALSE	no_overlap	NA	NA	NA	Conserved	NA	NA	NA
chr1	59045353	59045475	ENSG00000172456	FGGY	TRUE	TRUE	no_overlap	NA	NA	NA	Alternate	NA	NA	NA
chr1	59063700	59063817	ENSG00000172456	FGGY	TRUE	TRUE	no_overlap	NA	NA	NA	Alternate	chr4	95326040	95326083
chr1	59146920	59147065	ENSG00000172456	FGGY	TRUE	TRUE	no_overlap	NA	NA	NA	Alternate	NA	NA	NA
chr1	59292716	59292849	ENSG00000172456	FGGY	TRUE	FALSE	no_overlap	NA	NA	NA	Alternate	NA	NA	NA
chr1	59333089	59333187	ENSG00000172456	FGGY	TRUE	TRUE	no_overlap	NA	NA	NA	Alternate	chr4	95590941	95591022
chr1	59570576	59570793	ENSG00000172456	FGGY	TRUE	TRUE	no_overlap	NA	NA	NA	Alternate	chr4	95777952	95778149
chr1	61077119	61077263	ENSG00000162599	NFIA	TRUE	TRUE	low_confidence	chr4	97772255	97772530	Other	chr4	97772341	97772469
chr1	61077119	61077263	ENSG00000162599	NFIA	TRUE	TRUE	low_confidence	chr4	97773222	97773507	Other	chr4	97772341	97772469
chr1	61077335	61077419	ENSG00000162599	NFIA	TRUE	TRUE	low_confidence	chr4	97772255	97772530	Other	chr4	97772540	97772699
chr1	61077335	61077419	ENSG00000162599	NFIA	TRUE	TRUE	low_confidence	chr4	97773222	97773507	Other	chr4	97772540	97772699
chr1	61725041	61725234	ENSG00000162604	TM2D1	TRUE	TRUE	low_confidence	chr4	98382702	98382975	Other	chr4	98383157	98383306
chr1	61725041	61725234	ENSG00000162604	TM2D1	TRUE	TRUE	low_confidence	chr4	98383084	98383315	Other	chr4	98383157	98383306
chr1	62436207	62436431	ENSG00000162607	USP1	TRUE	TRUE	high_confidence	chr4	98923687	98923842	Conserved	chr4	98923040	98923292
chr1	62436207	62436431	ENSG00000162607	USP1	TRUE	TRUE	high_confidence	chr4	98922945	98923391	Conserved	chr4	98923040	98923292
chr1	62436207	62436431	ENSG00000162607	USP1	TRUE	TRUE	high_confidence	chr4	98923618	98923909	Conserved	chr4	98923040	98923292
chr1	62436629	62436969	ENSG00000162607	USP1	TRUE	TRUE	high_confidence	chr4	98923687	98923842	Conserved	chr4	98923482	98923861
chr1	62436629	62436969	ENSG00000162607	USP1	TRUE	TRUE	high_confidence	chr4	98922945	98923391	Conserved	chr4	98923482	98923861
chr1	62436629	62436969	ENSG00000162607	USP1	TRUE	TRUE	high_confidence	chr4	98923618	98923909	Conserved	chr4	98923482	98923861
chr1	62450389	62450564	ENSG00000162607	USP1	TRUE	TRUE	no_overlap	NA	NA	NA	Conserved	chr4	98934213	98934385
chr1	63523198	63523371	ENSG00000142856	ITGB3BP	TRUE	TRUE	low_confidence	chr4	99828974	99829650	Other	chr4	99829121	99829293
chr1	64864102	64864430	ENSG00000162434	JAK1	TRUE	TRUE	low_confidence	chr4	101176351	101176490	Conserved	chr4	101176173	101176486
chr1	64877233	64877500	ENSG00000162434	JAK1	TRUE	TRUE	high_confidence	chr4	101187428	101187628	Conserved	chr4	101187439	101187685
chr1	64877233	64877500	ENSG00000162434	JAK1	TRUE	TRUE	high_confidence	chr4	101187334	101187674	Conserved	chr4	101187439	101187685
chr1	64923527	64923666	ENSG00000162434	JAK1	TRUE	TRUE	no_overlap	NA	NA	NA	Conserved	chr4	101225146	101225251
chr1	64956941	64957166	ENSG00000162434	JAK1	TRUE	TRUE	high_confidence	chr4	101254178	101254311	Conserved	chr4	101254675	101254879
chr1	64956941	64957166	ENSG00000162434	JAK1	TRUE	TRUE	high_confidence	chr4	101254090	101254349	Conserved	chr4	101254675	101254879
chr1	64956941	64957166	ENSG00000162434	JAK1	TRUE	TRUE	high_confidence	chr4	101254752	101254892	Conserved	chr4	101254675	101254879
chr1	64965971	64966133	ENSG00000162434	JAK1	TRUE	TRUE	low_confidence	chr4	101264714	101264919	Conserved	chr4	101264844	101264917
chr1	64965971	64966133	ENSG00000162434	JAK1	TRUE	TRUE	low_confidence	chr4	101265153	101265529	Conserved	chr4	101264844	101264917
chr1	64966653	64966769	ENSG00000162434	JAK1	TRUE	TRUE	low_confidence	chr4	101264714	101264919	Conserved	chr4	101265344	101265438
chr1	64966653	64966769	ENSG00000162434	JAK1	TRUE	TRUE	low_confidence	chr4	101265153	101265529	Conserved	chr4	101265344	101265438
chr1	65002628	65002739	ENSG00000162434	JAK1	TRUE	TRUE	low_confidence	chr4	101293144	101293483	Conserved	NA	NA	NA
chr1	65066966	65067094	ENSG00000162433	AK4	TRUE	TRUE	low_confidence	chr4	101356253	101356429	Other	chr4	101356320	101356325
chr1	66242786	66242904	ENSG00000184588	PDE4B	TRUE	TRUE	low_confidence	chr4	102481212	102481383	Conserved	chr4	102481222	102481318
chr1	66274759	66274866	ENSG00000184588	PDE4B	TRUE	TRUE	no_overlap	NA	NA	NA	Conserved	chr4	102513703	102513820
chr1	66275151	66275436	ENSG00000184588	PDE4B	TRUE	TRUE	no_overlap	NA	NA	NA	Conserved	chr4	102514582	102514838
chr1	66276245	66276494	ENSG00000184588	PDE4B	TRUE	TRUE	no_overlap	NA	NA	NA	Conserved	chr4	102515529	102515681
chr1	66283865	66283975	ENSG00000184588	PDE4B	TRUE	TRUE	low_confidence	chr4	102521313	102521493	Conserved	chr4	102524289	102524368
chr1	66285750	66285906	ENSG00000184588	PDE4B	TRUE	TRUE	no_overlap	NA	NA	NA	Conserved	chr4	102527223	102527353
chr1	66302832	66303013	ENSG00000184588	PDE4B	TRUE	TRUE	no_overlap	NA	NA	NA	Conserved	chr4	102539099	102539282
chr1	66330757	66331049	ENSG00000184588	PDE4B	TRUE	TRUE	high_confidence	chr4	102569090	102569318	Conserved	chr4	102569008	102569336
chr1	66330757	66331049	ENSG00000184588	PDE4B	TRUE	TRUE	high_confidence	chr4	102569063	102569333	Conserved	chr4	102569008	102569336
chr1	66330757	66331049	ENSG00000184588	PDE4B	TRUE	TRUE	high_confidence	chr4	102570269	102570666	Conserved	chr4	102569008	102569336
chr1	66332256	66332468	ENSG00000184588	PDE4B	TRUE	TRUE	high_confidence	chr4	102570388	102570602	Conserved	chr4	102570525	102570726
chr1	66332256	66332468	ENSG00000184588	PDE4B	TRUE	TRUE	high_confidence	chr4	102570269	102570666	Conserved	chr4	102570525	102570726
chr1	66336136	66336320	ENSG00000184588	PDE4B	TRUE	TRUE	no_overlap	NA	NA	NA	Conserved	chr4	102574431	102574614
chr1	66350267	66350446	ENSG00000184588	PDE4B	TRUE	TRUE	high_confidence	chr4	102584696	102584890	Conserved	chr4	102585693	102585893
chr1	66350267	66350446	ENSG00000184588	PDE4B	TRUE	TRUE	high_confidence	chr4	102585681	102585783	Conserved	chr4	102585693	102585893
chr1	66350267	66350446	ENSG00000184588	PDE4B	TRUE	TRUE	high_confidence	chr4	102584651	102584953	Conserved	chr4	102585693	102585893
chr1	66350267	66350446	ENSG00000184588	PDE4B	TRUE	TRUE	high_confidence	chr4	102585553	102585799	Conserved	chr4	102585693	102585893
chr1	66357618	66357711	ENSG00000184588	PDE4B	TRUE	TRUE	no_overlap	NA	NA	NA	Conserved	chr4	102592342	102592411
chr1	66930200	66930360	ENSG00000198160	MIER1	TRUE	TRUE	low_confidence	chr4	103119276	103119451	Other	chr4	103119335	103119469
chr1	66930200	66930360	ENSG00000198160	MIER1	TRUE	TRUE	low_confidence	chr4	103119742	103119851	Other	chr4	103119335	103119469
chr1	66930200	66930360	ENSG00000198160	MIER1	TRUE	TRUE	low_confidence	chr4	103120121	103120230	Other	chr4	103119335	103119469
chr1	66981811	66981889	ENSG00000198160	MIER1	TRUE	TRUE	no_overlap	NA	NA	NA	Other	chr4	103159714	103159792
chr1	67054306	67054314	ENSG00000116704	SLC35D1	TRUE	TRUE	low_confidence	chr4	103214401	103214570	Other	chr4	103215325	103215326
chr1	67054306	67054314	ENSG00000116704	SLC35D1	TRUE	TRUE	low_confidence	chr4	103214674	103214872	Other	chr4	103215325	103215326
chr1	67054306	67054314	ENSG00000116704	SLC35D1	TRUE	TRUE	low_confidence	chr4	103215303	103215439	Other	chr4	103215325	103215326
chr1	67142976	67143178	ENSG00000162594	IL23R	TRUE	FALSE	no_overlap	NA	NA	NA	Conserved	NA	NA	NA
chr1	67170947	67171225	ENSG00000162594	IL23R	TRUE	TRUE	high_confidence	chr6	67483116	67483359	Conserved	chr6	67484036	67484305
chr1	67170947	67171225	ENSG00000162594	IL23R	TRUE	TRUE	high_confidence	chr6	67483037	67483538	Conserved	chr6	67484036	67484305
chr1	67172093	67172294	ENSG00000162594	IL23R	TRUE	TRUE	high_confidence	chr6	67483116	67483359	Conserved	chr6	67483203	67483410
chr1	67172093	67172294	ENSG00000162594	IL23R	TRUE	TRUE	high_confidence	chr6	67483037	67483538	Conserved	chr6	67483203	67483410
chr1	67172093	67172294	ENSG00000162594	IL23R	TRUE	TRUE	high_confidence	chr6	67481881	67482175	Conserved	chr6	67483203	67483410
chr1	67194533	67194834	ENSG00000162594	IL23R	TRUE	TRUE	high_confidence	chr6	67475703	67475825	Conserved	chr6	67475631	67475815
chr1	67194533	67194834	ENSG00000162594	IL23R	TRUE	TRUE	high_confidence	chr6	67475622	67475859	Conserved	chr6	67475631	67475815
chr1	67265033	67265184	ENSG00000162594	IL23R	TRUE	TRUE	high_confidence	chr6	67415359	67415588	Conserved	chr6	67415392	67415536
chr1	67265033	67265184	ENSG00000162594	IL23R	TRUE	TRUE	high_confidence	chr6	67415323	67415658	Conserved	chr6	67415392	67415536
chr1	67274698	67275025	ENSG00000162594	IL23R	TRUE	TRUE	high_confidence	chr6	67399598	67399902	Conserved	chr6	67399557	67399873
chr1	67274698	67275025	ENSG00000162594	IL23R	TRUE	TRUE	high_confidence	chr6	67399576	67399934	Conserved	chr6	67399557	67399873
chr1	67294911	67295242	ENSG00000081985	IL12RB2	TRUE	FALSE	no_overlap	NA	NA	NA	Conserved	NA	NA	NA
chr1	67304209	67304313	ENSG00000081985	IL12RB2	TRUE	TRUE	low_confidence	chr6	67378084	67378347	Conserved	chr6	67378229	67378324
chr1	67307332	67307528	ENSG00000081985	IL12RB2	TRUE	FALSE	no_overlap	NA	NA	NA	Conserved	NA	NA	NA
chr1	67317930	67318107	ENSG00000081985	IL12RB2	TRUE	FALSE	no_overlap	NA	NA	NA	Conserved	NA	NA	NA
chr1	67333019	67333411	ENSG00000081985	IL12RB2	TRUE	TRUE	high_confidence	chr6	67347896	67348388	Conserved	chr6	67348089	67348379
chr1	67333019	67333411	ENSG00000081985	IL12RB2	TRUE	TRUE	high_confidence	chr6	67347870	67348401	Conserved	chr6	67348089	67348379
chr1	67336275	67336400	ENSG00000081985	IL12RB2	TRUE	TRUE	low_confidence	chr6	67338065	67338205	Conserved	chr6	67338078	67338195
chr1	67336275	67336400	ENSG00000081985	IL12RB2	TRUE	TRUE	low_confidence	chr6	67337713	67337841	Conserved	chr6	67338078	67338195
chr1	67336917	67337163	ENSG00000081985	IL12RB2	TRUE	TRUE	low_confidence	chr6	67338065	67338205	Conserved	NA	NA	NA
chr1	67336917	67337163	ENSG00000081985	IL12RB2	TRUE	TRUE	low_confidence	chr6	67337713	67337841	Conserved	NA	NA	NA
chr1	67342451	67342621	ENSG00000081985	IL12RB2	TRUE	TRUE	high_confidence	chr6	67334994	67335118	Conserved	chr6	67334679	67335083
chr1	67342451	67342621	ENSG00000081985	IL12RB2	TRUE	TRUE	high_confidence	chr6	67334908	67335196	Conserved	chr6	67334679	67335083
chr1	67350916	67351026	ENSG00000081985	IL12RB2	TRUE	TRUE	no_overlap	NA	NA	NA	Conserved	chr6	67316254	67316361
chr1	67429077	67429152	ENSG00000142864	SERBP1	TRUE	TRUE	no_overlap	NA	NA	NA	Conserved	chr6	67268158	67268226
chr1	67430325	67430682	ENSG00000142864	SERBP1	TRUE	TRUE	high_confidence	chr6	67266823	67266951	Conserved	chr6	67266718	67267072
chr1	67430325	67430682	ENSG00000142864	SERBP1	TRUE	TRUE	high_confidence	chr6	67266636	67267180	Conserved	chr6	67266718	67267072
chr1	67431023	67431159	ENSG00000142864	SERBP1	TRUE	TRUE	high_confidence	chr6	67266823	67266951	Conserved	chr6	67266283	67266397
chr1	67431023	67431159	ENSG00000142864	SERBP1	TRUE	TRUE	high_confidence	chr6	67266636	67267180	Conserved	chr6	67266283	67266397
chr1	67685225	67685376	ENSG00000116717	GADD45A	TRUE	TRUE	low_confidence	chr6	67037267	67037616	Other	chr6	67037328	67037396
chr1	70205573	70205747	ENSG00000116754	SRSF11	TRUE	TRUE	low_confidence	chr3	158036269	158036766	Other	chr3	158036549	158036694
chr1	70221274	70221511	ENSG00000116754	SRSF11	TRUE	TRUE	low_confidence	chr3	158031679	158031966	Other	NA	NA	NA
chr1	70221274	70221511	ENSG00000116754	SRSF11	TRUE	TRUE	low_confidence	chr3	158031264	158031639	Other	NA	NA	NA
chr1	70354716	70354880	ENSG00000197568	HHLA3	FALSE	TRUE	low_confidence	chr3	157946871	157947352	Other	chr3	157947109	157947250
chr1	71081280	71081408	ENSG00000132485	ZRANB2	TRUE	TRUE	high_confidence	chr3	157534228	157534339	Conserved	chr3	157534037	157534159
chr1	71081280	71081408	ENSG00000132485	ZRANB2	TRUE	TRUE	high_confidence	chr3	157534000	157534564	Conserved	chr3	157534037	157534159
chr1	75724929	75725024	ENSG00000117054	ACADM	TRUE	TRUE	low_confidence	chr3	153944097	153944958	Other	chr3	153944211	153944341
chr1	75786139	75786356	ENSG00000137955	RABGGTB	TRUE	TRUE	low_confidence	chr3	153912722	153913198	Other	chr3	153912877	153913058
chr1	77219394	77219499	ENSG00000142892	PIGK	TRUE	TRUE	low_confidence	chr3	152713978	152714282	Other	chr3	152714071	152714143
chr1	77413674	77413792	ENSG00000154027	AK5	TRUE	TRUE	no_overlap	NA	NA	NA	Other	chr3	152531051	152531164
chr1	77421653	77421742	ENSG00000154027	AK5	TRUE	TRUE	no_overlap	NA	NA	NA	Other	chr3	152521474	152521550
chr1	77431478	77431614	ENSG00000154027	AK5	TRUE	FALSE	no_overlap	NA	NA	NA	Other	NA	NA	NA
chr1	77683338	77683622	ENSG00000036549	AC118549.1	TRUE	TRUE	low_confidence	chr3	152396194	152396711	Other	chr3	152395865	152396078
chr1	77683338	77683622	ENSG00000036549	AC118549.1	TRUE	TRUE	low_confidence	chr3	152395810	152396061	Other	chr3	152395865	152396078
chr1	77759779	77759882	ENSG00000077254	USP33	TRUE	TRUE	low_confidence	chr3	152346351	152346609	Other	chr3	152346478	152346565
chr1	77779547	77779676	ENSG00000180488	MIGA1	TRUE	TRUE	no_overlap	NA	NA	NA	Other	chr3	152340370	152340491
chr1	77979223	77979362	ENSG00000162613	FUBP1	TRUE	TRUE	low_confidence	chr3	152210732	152211027	Other	chr3	152210220	152210350
chr1	77979223	77979362	ENSG00000162613	FUBP1	TRUE	TRUE	low_confidence	chr3	152210108	152210594	Other	chr3	152210220	152210350
chr1	77979456	77979590	ENSG00000162613	FUBP1	TRUE	TRUE	low_confidence	chr3	152210732	152211027	Other	chr3	152210028	152210161
chr1	77979456	77979590	ENSG00000162613	FUBP1	TRUE	TRUE	low_confidence	chr3	152210108	152210594	Other	chr3	152210028	152210161
chr1	83270868	83271022	ENSG00000137941	TTLL7	TRUE	TRUE	no_overlap	NA	NA	NA	Other	chr3	147576823	147576959
chr1	84144198	84144352	ENSG00000142875	PRKACB	TRUE	TRUE	low_confidence	chr3	146781356	146781524	Other	chr3	146781343	146781489
chr1	84442393	84442522	ENSG00000137976	DNASE2B	TRUE	FALSE	no_overlap	NA	NA	NA	Other	NA	NA	NA
chr1	84574343	84574433	ENSG00000117151	CTBS	TRUE	TRUE	low_confidence	chr3	146450373	146450663	Other	chr3	146450458	146450535
chr1	84690442	84690574	ENSG00000117155	SSX2IP	TRUE	TRUE	low_confidence	chr3	146404453	146404668	Other	chr3	146404621	146404738
chr1	84690626	84690822	ENSG00000117155	SSX2IP	TRUE	TRUE	low_confidence	chr3	146404453	146404668	Other	chr3	146404448	146404584
chr1	84780083	84780214	ENSG00000171517	LPAR3	TRUE	TRUE	no_overlap	NA	NA	NA	Conserved	NA	NA	NA
chr1	84854487	84854626	ENSG00000171517	LPAR3	TRUE	TRUE	high_confidence	chr3	146251906	146252036	Conserved	chr3	146251881	146252013
chr1	84854487	84854626	ENSG00000171517	LPAR3	TRUE	TRUE	high_confidence	chr3	146251881	146252070	Conserved	chr3	146251881	146252013
chr1	84862768	84863185	ENSG00000171517	LPAR3	TRUE	TRUE	no_overlap	NA	NA	NA	Conserved	NA	NA	NA
chr1	84876442	84876599	ENSG00000171517	LPAR3	TRUE	TRUE	no_overlap	NA	NA	NA	Conserved	NA	NA	NA
chr1	84959503	84959615	ENSG00000153898	MCOLN2	TRUE	TRUE	no_overlap	NA	NA	NA	Other	chr3	146168958	146169242
chr1	84996073	84996233	ENSG00000153898	MCOLN2	TRUE	TRUE	low_confidence	chr3	146152529	146152685	Other	chr3	146152068	146152228
chr1	85022877	85022974	ENSG00000055732	MCOLN3	TRUE	TRUE	no_overlap	NA	NA	NA	Other	chr3	146136631	146136739
chr1	85202009	85202134	ENSG00000097096	SYDE2	TRUE	TRUE	low_confidence	chr3	145987694	145987803	Other	chr3	145987634	145987711
chr1	85298259	85298526	ENSG00000153904	DDAH1	TRUE	TRUE	no_overlap	NA	NA	NA	Other	chr3	145910081	145910298
chr1	85708438	85708616	ENSG00000117174	ZNHIT6	TRUE	TRUE	low_confidence	chr3	145576116	145576425	Other	chr3	145576133	145576227
chr1	86429997	86430088	ENSG00000137975	CLCA2	TRUE	TRUE	no_overlap	NA	NA	NA	Other	chr3	145092938	145093015
chr1	86704442	86704583	ENSG00000097033	SH3GLB1	TRUE	TRUE	high_confidence	chr3	144720430	144720637	Conserved	chr3	144720372	144720546
chr1	86704442	86704583	ENSG00000097033	SH3GLB1	TRUE	TRUE	high_confidence	chr3	144720041	144720705	Conserved	chr3	144720372	144720546
chr1	86704690	86704871	ENSG00000097033	SH3GLB1	TRUE	TRUE	high_confidence	chr3	144720430	144720637	Conserved	chr3	144720082	144720263
chr1	86704690	86704871	ENSG00000097033	SH3GLB1	TRUE	TRUE	high_confidence	chr3	144720041	144720705	Conserved	chr3	144720082	144720263
chr1	87328456	87328541	ENSG00000143013	LMO4	TRUE	TRUE	low_confidence	chr3	144205463	144205638	Other	chr3	144205460	144205545
chr1	87328456	87328541	ENSG00000143013	LMO4	TRUE	TRUE	low_confidence	chr3	144205073	144205275	Other	chr3	144205460	144205545
chr1	87328721	87328983	ENSG00000143013	LMO4	TRUE	TRUE	low_confidence	chr3	144205463	144205638	Other	chr3	144205097	144205311
chr1	87328721	87328983	ENSG00000143013	LMO4	TRUE	TRUE	low_confidence	chr3	144205073	144205275	Other	chr3	144205097	144205311
chr1	87335248	87335388	ENSG00000143013	LMO4	TRUE	TRUE	low_confidence	chr3	144198629	144198743	Other	chr3	144198699	144198794
chr1	88684064	88684295	ENSG00000065243	PKN2	TRUE	TRUE	high_confidence	chr3	142881942	142882078	Conserved	chr3	142881932	142882142
chr1	88684064	88684295	ENSG00000065243	PKN2	TRUE	TRUE	high_confidence	chr3	142882362	142882548	Conserved	chr3	142881932	142882142
chr1	88684064	88684295	ENSG00000065243	PKN2	TRUE	TRUE	high_confidence	chr3	142881923	142882293	Conserved	chr3	142881932	142882142
chr1	88992535	88992626	ENSG00000213516	RBMXL1	FALSE	TRUE	low_confidence	chr3	142701351	142701460	Other	NA	NA	NA
chr1	89021775	89021865	ENSG00000117226	GBP3	FALSE	TRUE	no_overlap	NA	NA	NA	Other	NA	NA	NA
chr1	89128912	89129058	ENSG00000213512	GBP7	FALSE	FALSE	no_overlap	NA	NA	NA	Other	NA	NA	NA
chr1	89259589	89259883	ENSG00000154451	GBP5	TRUE	TRUE	no_overlap	NA	NA	NA	Alternate	chr3	142521304	142521322
chr1	89279020	89279129	ENSG00000154451	GBP5	TRUE	FALSE	no_overlap	NA	NA	NA	Alternate	NA	NA	NA
chr1	89464106	89464231	ENSG00000197147	LRRC8B	TRUE	FALSE	no_overlap	NA	NA	NA	Conserved	NA	NA	NA
chr1	89524668	89524855	ENSG00000197147	LRRC8B	TRUE	TRUE	high_confidence	chr5	105415541	105415752	Conserved	chr5	105415636	105415775
chr1	89524668	89524855	ENSG00000197147	LRRC8B	TRUE	TRUE	high_confidence	chr5	105415250	105415784	Conserved	chr5	105415636	105415775
chr1	89607285	89607426	ENSG00000197147	LRRC8B	TRUE	TRUE	no_overlap	NA	NA	NA	Conserved	chr5	105497236	105497348
chr1	89608399	89608581	ENSG00000197147	LRRC8B	TRUE	TRUE	no_overlap	NA	NA	NA	Conserved	NA	NA	NA
chr1	89608973	89609153	ENSG00000197147	LRRC8B	TRUE	TRUE	no_overlap	NA	NA	NA	Conserved	NA	NA	NA
chr1	89610798	89610985	ENSG00000197147	LRRC8B	TRUE	FALSE	no_overlap	NA	NA	NA	Conserved	NA	NA	NA
chr1	89611847	89612020	ENSG00000197147	LRRC8B	TRUE	FALSE	no_overlap	NA	NA	NA	Conserved	NA	NA	NA
chr1	89632608	89632801	ENSG00000171488	LRRC8C	TRUE	TRUE	high_confidence	chr5	105518597	105518767	Conserved	chr5	105518946	105519125
chr1	89632608	89632801	ENSG00000171488	LRRC8C	TRUE	TRUE	high_confidence	chr5	105518864	105518889	Conserved	chr5	105518946	105519125
chr1	89632608	89632801	ENSG00000171488	LRRC8C	TRUE	TRUE	high_confidence	chr5	105518935	105518972	Conserved	chr5	105518946	105519125
chr1	89632608	89632801	ENSG00000171488	LRRC8C	TRUE	TRUE	high_confidence	chr5	105519218	105519360	Conserved	chr5	105518946	105519125
chr1	89632608	89632801	ENSG00000171488	LRRC8C	TRUE	TRUE	high_confidence	chr5	105518566	105519140	Conserved	chr5	105518946	105519125
chr1	89632608	89632801	ENSG00000171488	LRRC8C	TRUE	TRUE	high_confidence	chr5	105519203	105519522	Conserved	chr5	105518946	105519125
chr1	89632953	89633112	ENSG00000171488	LRRC8C	TRUE	TRUE	high_confidence	chr5	105518597	105518767	Conserved	chr5	105519267	105519431
chr1	89632953	89633112	ENSG00000171488	LRRC8C	TRUE	TRUE	high_confidence	chr5	105518864	105518889	Conserved	chr5	105519267	105519431
chr1	89632953	89633112	ENSG00000171488	LRRC8C	TRUE	TRUE	high_confidence	chr5	105518935	105518972	Conserved	chr5	105519267	105519431
chr1	89632953	89633112	ENSG00000171488	LRRC8C	TRUE	TRUE	high_confidence	chr5	105519218	105519360	Conserved	chr5	105519267	105519431
chr1	89632953	89633112	ENSG00000171488	LRRC8C	TRUE	TRUE	high_confidence	chr5	105518566	105519140	Conserved	chr5	105519267	105519431
chr1	89632953	89633112	ENSG00000171488	LRRC8C	TRUE	TRUE	high_confidence	chr5	105519203	105519522	Conserved	chr5	105519267	105519431
chr1	89633415	89633578	ENSG00000271949	AC093423.3	FALSE	TRUE	high_confidence	chr5	105518597	105518767	Other	chr5	105519729	105519870
chr1	89633415	89633578	ENSG00000271949	AC093423.3	FALSE	TRUE	high_confidence	chr5	105518864	105518889	Other	chr5	105519729	105519870
chr1	89633415	89633578	ENSG00000271949	AC093423.3	FALSE	TRUE	high_confidence	chr5	105518935	105518972	Other	chr5	105519729	105519870
chr1	89633415	89633578	ENSG00000271949	AC093423.3	FALSE	TRUE	high_confidence	chr5	105519218	105519360	Other	chr5	105519729	105519870
chr1	89633415	89633578	ENSG00000271949	AC093423.3	FALSE	TRUE	high_confidence	chr5	105518566	105519140	Other	chr5	105519729	105519870
chr1	89633415	89633578	ENSG00000271949	AC093423.3	FALSE	TRUE	high_confidence	chr5	105519203	105519522	Other	chr5	105519729	105519870
chr1	89721523	89721638	ENSG00000271949	AC093423.3	FALSE	TRUE	high_confidence	chr5	105614863	105614931	Other	chr5	105614829	105614942
chr1	89721523	89721638	ENSG00000271949	AC093423.3	FALSE	TRUE	high_confidence	chr5	105614737	105615010	Other	chr5	105614829	105614942
chr1	89724732	89724864	ENSG00000271949	AC093423.3	FALSE	TRUE	low_confidence	chr5	105620369	105620888	Other	chr5	105620247	105620383
chr1	89757664	89757878	ENSG00000271949	AC093423.3	FALSE	TRUE	low_confidence	chr5	105648648	105648907	Other	chr5	105648780	105648983
chr1	89757664	89757878	ENSG00000271949	AC093423.3	FALSE	TRUE	low_confidence	chr5	105649512	105650084	Other	chr5	105648780	105648983
chr1	89821563	89821646	ENSG00000171492	LRRC8D	TRUE	TRUE	low_confidence	chr5	105699874	105700010	Other	chr5	105700462	105700524
chr1	89821563	89821646	ENSG00000171492	LRRC8D	TRUE	TRUE	low_confidence	chr5	105700483	105700820	Other	chr5	105700462	105700524
chr1	89843305	89843483	ENSG00000171492	LRRC8D	TRUE	TRUE	low_confidence	chr5	105731138	105731799	Other	chr5	105731985	105732109
chr1	89843305	89843483	ENSG00000171492	LRRC8D	TRUE	TRUE	low_confidence	chr5	105731975	105732347	Other	chr5	105731985	105732109
chr1	89843305	89843483	ENSG00000171492	LRRC8D	TRUE	TRUE	low_confidence	chr5	105732524	105732676	Other	chr5	105731985	105732109
chr1	89957152	89957275	ENSG00000171492	LRRC8D	TRUE	TRUE	no_overlap	NA	NA	NA	Other	chr5	105835961	105836080
chr1	90851627	90851706	ENSG00000122482	ZNF644	TRUE	TRUE	low_confidence	chr5	106574639	106574813	Other	chr5	106574691	106574764
chr1	91022065	91022215	ENSG00000122482	ZNF644	TRUE	TRUE	low_confidence	chr5	106696312	106696470	Other	chr5	106696607	106696755
chr1	91022065	91022215	ENSG00000122482	ZNF644	TRUE	TRUE	low_confidence	chr5	106696549	106696667	Other	chr5	106696607	106696755
chr1	91022065	91022215	ENSG00000122482	ZNF644	TRUE	TRUE	low_confidence	chr5	106696709	106697021	Other	chr5	106696607	106696755
chr1	91116798	91116938	ENSG00000122482	ZNF644	TRUE	TRUE	no_overlap	NA	NA	NA	Other	NA	NA	NA
chr1	91125105	91125184	ENSG00000122482	ZNF644	TRUE	TRUE	no_overlap	NA	NA	NA	Other	chr5	106773334	106773411
chr1	91542023	91542227	ENSG00000097046	CDC7	TRUE	TRUE	no_overlap	NA	NA	NA	Other	chr5	106996399	106996575
chr1	91548576	91548659	ENSG00000097046	CDC7	TRUE	TRUE	no_overlap	NA	NA	NA	Other	chr5	107003641	107004172
chr1	91549054	91549348	ENSG00000097046	CDC7	TRUE	TRUE	no_overlap	NA	NA	NA	Other	chr5	107004691	107004938
chr1	91549433	91549651	ENSG00000097046	CDC7	TRUE	TRUE	no_overlap	NA	NA	NA	Other	chr5	107005022	107005213
chr1	91551102	91551220	ENSG00000097046	CDC7	TRUE	TRUE	no_overlap	NA	NA	NA	Other	NA	NA	NA
chr1	91555943	91556442	ENSG00000097046	CDC7	TRUE	TRUE	no_overlap	NA	NA	NA	Other	chr5	107010640	107011725
chr1	91560166	91560353	ENSG00000097046	CDC7	TRUE	TRUE	no_overlap	NA	NA	NA	Other	NA	NA	NA
chr1	91684583	91684733	ENSG00000069702	TGFBR3	TRUE	TRUE	no_overlap	NA	NA	NA	Conserved	chr5	107110600	107110749
chr1	91697580	91697672	ENSG00000069702	TGFBR3	TRUE	TRUE	no_overlap	NA	NA	NA	Conserved	chr5	107120887	107120975
chr1	91713599	91713695	ENSG00000069702	TGFBR3	TRUE	TRUE	no_overlap	NA	NA	NA	Conserved	chr5	107134042	107134131
chr1	91730040	91730276	ENSG00000069702	TGFBR3	TRUE	TRUE	no_overlap	NA	NA	NA	Conserved	chr5	107150025	107150234
chr1	91753994	91754127	ENSG00000069702	TGFBR3	TRUE	TRUE	no_overlap	NA	NA	NA	Conserved	chr5	107170599	107170725
chr1	91791903	91792168	ENSG00000069702	TGFBR3	TRUE	TRUE	no_overlap	NA	NA	NA	Conserved	chr5	107210486	107210714
chr1	91803815	91804048	ENSG00000069702	TGFBR3	TRUE	TRUE	no_overlap	NA	NA	NA	Conserved	NA	NA	NA
chr1	91804517	91804993	ENSG00000069702	TGFBR3	TRUE	TRUE	no_overlap	NA	NA	NA	Conserved	chr5	107220175	107220503
chr1	91872714	91872893	ENSG00000069702	TGFBR3	TRUE	TRUE	no_overlap	NA	NA	NA	Conserved	chr5	107279482	107279625
chr1	91876007	91876153	ENSG00000069702	TGFBR3	TRUE	TRUE	high_confidence	chr5	107282541	107282805	Conserved	NA	NA	NA
chr1	91876007	91876153	ENSG00000069702	TGFBR3	TRUE	TRUE	high_confidence	chr5	107282476	107282857	Conserved	NA	NA	NA
chr1	91876203	91876408	ENSG00000069702	TGFBR3	TRUE	TRUE	high_confidence	chr5	107282541	107282805	Conserved	chr5	107282592	107282601
chr1	91876203	91876408	ENSG00000069702	TGFBR3	TRUE	TRUE	high_confidence	chr5	107282476	107282857	Conserved	chr5	107282592	107282601
chr1	91876203	91876408	ENSG00000069702	TGFBR3	TRUE	TRUE	high_confidence	chr5	107283354	107283612	Conserved	chr5	107282592	107282601
chr1	91885367	91885597	ENSG00000069702	TGFBR3	TRUE	TRUE	high_confidence	chr5	107289337	107289386	Conserved	chr5	107288834	107289058
chr1	91885367	91885597	ENSG00000069702	TGFBR3	TRUE	TRUE	high_confidence	chr5	107288448	107288658	Conserved	chr5	107288834	107289058
chr1	91885367	91885597	ENSG00000069702	TGFBR3	TRUE	TRUE	high_confidence	chr5	107289186	107289516	Conserved	chr5	107288834	107289058
chr1	91886162	91886295	ENSG00000069702	TGFBR3	TRUE	TRUE	high_confidence	chr5	107289337	107289386	Conserved	chr5	107289551	107289674
chr1	91886162	91886295	ENSG00000069702	TGFBR3	TRUE	TRUE	high_confidence	chr5	107288448	107288658	Conserved	chr5	107289551	107289674
chr1	91886162	91886295	ENSG00000069702	TGFBR3	TRUE	TRUE	high_confidence	chr5	107289186	107289516	Conserved	chr5	107289551	107289674
chr1	91948548	91948790	ENSG00000137948	BRDT	TRUE	FALSE	no_overlap	NA	NA	NA	Other	NA	NA	NA
chr1	91948915	91949235	ENSG00000137948	BRDT	TRUE	FALSE	no_overlap	NA	NA	NA	Other	NA	NA	NA
chr1	92298945	92299040	ENSG00000122484	RPAP2	TRUE	TRUE	low_confidence	chr5	107597286	107597396	Conserved	chr5	107597566	107597741
chr1	92298945	92299040	ENSG00000122484	RPAP2	TRUE	TRUE	low_confidence	chr5	107597433	107597604	Conserved	chr5	107597566	107597741
chr1	92298945	92299040	ENSG00000122484	RPAP2	TRUE	TRUE	low_confidence	chr5	107597735	107598086	Conserved	chr5	107597566	107597741
chr1	92311996	92312096	ENSG00000122484	RPAP2	TRUE	TRUE	no_overlap	NA	NA	NA	Conserved	NA	NA	NA
chr1	92316148	92316376	ENSG00000122484	RPAP2	TRUE	TRUE	no_overlap	NA	NA	NA	Conserved	chr5	107612592	107612793
chr1	92317961	92318084	ENSG00000122484	RPAP2	TRUE	TRUE	no_overlap	NA	NA	NA	Conserved	NA	NA	NA
chr1	92365791	92365955	ENSG00000122484	RPAP2	TRUE	TRUE	high_confidence	chr5	107648877	107649141	Conserved	chr5	107648912	107649085
chr1	92365791	92365955	ENSG00000122484	RPAP2	TRUE	TRUE	high_confidence	chr5	107648803	107649180	Conserved	chr5	107648912	107649085
chr1	92366149	92366281	ENSG00000122484	RPAP2	TRUE	TRUE	high_confidence	chr5	107648877	107649141	Conserved	chr5	107649178	107649203
chr1	92366149	92366281	ENSG00000122484	RPAP2	TRUE	TRUE	high_confidence	chr5	107648803	107649180	Conserved	chr5	107649178	107649203
chr1	92410873	92410964	ENSG00000122484	RPAP2	TRUE	TRUE	no_overlap	NA	NA	NA	Conserved	chr5	107682099	107682192
chr1	92485831	92486013	ENSG00000162676	GFI1	TRUE	TRUE	high_confidence	chr5	107725828	107725956	Conserved	chr5	107725794	107725954
chr1	92485831	92486013	ENSG00000162676	GFI1	TRUE	TRUE	high_confidence	chr5	107726059	107726130	Conserved	chr5	107725794	107725954
chr1	92485831	92486013	ENSG00000162676	GFI1	TRUE	TRUE	high_confidence	chr5	107725375	107725649	Conserved	chr5	107725794	107725954
chr1	92485831	92486013	ENSG00000162676	GFI1	TRUE	TRUE	high_confidence	chr5	107725820	107726205	Conserved	chr5	107725794	107725954
chr1	92486111	92486246	ENSG00000162676	GFI1	TRUE	TRUE	high_confidence	chr5	107725828	107725956	Conserved	chr5	107726063	107726194
chr1	92486111	92486246	ENSG00000162676	GFI1	TRUE	TRUE	high_confidence	chr5	107726059	107726130	Conserved	chr5	107726063	107726194
chr1	92486111	92486246	ENSG00000162676	GFI1	TRUE	TRUE	high_confidence	chr5	107725375	107725649	Conserved	chr5	107726063	107726194
chr1	92486111	92486246	ENSG00000162676	GFI1	TRUE	TRUE	high_confidence	chr5	107725820	107726205	Conserved	chr5	107726063	107726194
chr1	92486887	92487093	ENSG00000162676	GFI1	TRUE	TRUE	high_confidence	chr5	107725828	107725956	Conserved	chr5	107726809	107726948
chr1	92486887	92487093	ENSG00000162676	GFI1	TRUE	TRUE	high_confidence	chr5	107726059	107726130	Conserved	chr5	107726809	107726948
chr1	92486887	92487093	ENSG00000162676	GFI1	TRUE	TRUE	high_confidence	chr5	107725820	107726205	Conserved	chr5	107726809	107726948
chr1	92583937	92584039	ENSG00000067208	EVI5	TRUE	TRUE	high_confidence	chr5	107777533	107777708	Conserved	chr5	107776885	107776986
chr1	92583937	92584039	ENSG00000067208	EVI5	TRUE	TRUE	high_confidence	chr5	107777449	107777757	Conserved	chr5	107776885	107776986
chr1	92831864	92832141	ENSG00000122406	RPL5	TRUE	TRUE	high_confidence	chr5	107900438	107900578	Conserved	chr5	107900449	107900670
chr1	92831864	92832141	ENSG00000122406	RPL5	TRUE	TRUE	high_confidence	chr5	107900376	107900754	Conserved	chr5	107900449	107900670
chr1	92882964	92883085	ENSG00000154511	FAM69A	TRUE	FALSE	no_overlap	NA	NA	NA	Other	NA	NA	NA
chr1	92961220	92961291	ENSG00000154511	FAM69A	TRUE	TRUE	low_confidence	chr5	107986227	107986505	Other	chr5	107986828	107986885
chr1	92961220	92961291	ENSG00000154511	FAM69A	TRUE	TRUE	low_confidence	chr5	107986634	107986754	Other	chr5	107986828	107986885
chr1	92961220	92961291	ENSG00000154511	FAM69A	TRUE	TRUE	low_confidence	chr5	107986965	107987447	Other	chr5	107986828	107986885
chr1	93079070	93079322	ENSG00000143033	MTF2	TRUE	TRUE	high_confidence	chr5	108065509	108065724	Conserved	chr5	108065496	108065755
chr1	93079070	93079322	ENSG00000143033	MTF2	TRUE	TRUE	high_confidence	chr5	108065450	108065948	Conserved	chr5	108065496	108065755
chr1	93079070	93079322	ENSG00000143033	MTF2	TRUE	TRUE	high_confidence	chr5	108066212	108066431	Conserved	chr5	108065496	108065755
chr1	93345749	93345949	ENSG00000117505	DR1	TRUE	TRUE	low_confidence	chr5	108268630	108269131	Other	chr5	108268787	108268962
chr1	93615319	93615466	ENSG00000137936	BCAR3	TRUE	TRUE	no_overlap	NA	NA	NA	Other	chr3	122482345	122482513
chr1	93712792	93712973	ENSG00000137936	BCAR3	TRUE	TRUE	no_overlap	NA	NA	NA	Other	chr3	122385261	122385424
chr1	93759047	93759239	ENSG00000137936	BCAR3	TRUE	TRUE	no_overlap	NA	NA	NA	Other	chr3	122340566	122340746
chr1	93846329	93846427	ENSG00000137936	BCAR3	TRUE	TRUE	low_confidence	chr3	122294083	122294218	Other	chr3	122294095	122294174
chr1	93846329	93846427	ENSG00000137936	BCAR3	TRUE	TRUE	low_confidence	chr3	122293720	122293892	Other	chr3	122294095	122294174
chr1	93846663	93846718	ENSG00000137936	BCAR3	TRUE	TRUE	low_confidence	chr3	122294083	122294218	Other	chr3	122293800	122293846
chr1	93846663	93846718	ENSG00000137936	BCAR3	TRUE	TRUE	low_confidence	chr3	122293720	122293892	Other	chr3	122293800	122293846
chr1	93846663	93846718	ENSG00000137936	BCAR3	TRUE	TRUE	low_confidence	chr3	122292879	122293130	Other	chr3	122293800	122293846
chr1	93847512	93847655	ENSG00000137936	BCAR3	TRUE	TRUE	low_confidence	chr3	122293720	122293892	Other	chr3	122292950	122293093
chr1	93847512	93847655	ENSG00000137936	BCAR3	TRUE	TRUE	low_confidence	chr3	122292879	122293130	Other	chr3	122292950	122293093
chr1	93847929	93848081	ENSG00000137936	BCAR3	TRUE	TRUE	low_confidence	chr3	122292879	122293130	Other	chr3	122292596	122292739
chr1	93879183	93879339	ENSG00000067334	DNTTIP2	TRUE	TRUE	low_confidence	chr3	122274240	122274444	Other	chr3	122274192	122274379
chr1	93909470	93909750	ENSG00000023909	GCLM	TRUE	TRUE	low_confidence	chr3	122245242	122245933	Other	chr3	122245418	122245646
chr1	94017545	94017785	ENSG00000198691	ABCA4	TRUE	TRUE	no_overlap	NA	NA	NA	Other	chr3	122151970	122152021
chr1	94418073	94418249	ENSG00000117528	ABCD3	TRUE	TRUE	low_confidence	chr3	121815279	121815601	Other	chr3	121815342	121815514
chr1	94418073	94418249	ENSG00000117528	ABCD3	TRUE	TRUE	low_confidence	chr3	121814682	121815032	Other	chr3	121815342	121815514
chr1	94418350	94418491	ENSG00000117528	ABCD3	TRUE	TRUE	low_confidence	chr3	121815279	121815601	Other	chr3	121815106	121815249
chr1	94418350	94418491	ENSG00000117528	ABCD3	TRUE	TRUE	low_confidence	chr3	121814682	121815032	Other	chr3	121815106	121815249
chr1	94602534	94602695	ENSG00000117525	F3	TRUE	TRUE	no_overlap	NA	NA	NA	Other	chr3	121689809	121689965
chr1	95072909	95073040	ENSG00000172339	ALG14	TRUE	TRUE	low_confidence	chr3	121291430	121292251	Other	chr3	121291724	121291838
chr1	95234081	95234232	ENSG00000122481	RWDD3	TRUE	TRUE	low_confidence	chr3	121171350	121171865	Other	chr3	121171675	121171797
chr1	97921481	97921601	ENSG00000188641	DPYD	TRUE	TRUE	no_overlap	NA	NA	NA	Other	chr3	118561709	118561787
chr1	97926405	97926558	ENSG00000188641	DPYD	TRUE	TRUE	no_overlap	NA	NA	NA	Other	chr3	118555462	118555696
chr1	97942411	97942427	ENSG00000188641	DPYD	TRUE	TRUE	no_overlap	NA	NA	NA	Other	chr3	118539110	118539126
chr1	97942490	97942680	ENSG00000188641	DPYD	TRUE	TRUE	no_overlap	NA	NA	NA	Other	chr3	118538865	118539051
chr1	98323893	98324154	ENSG00000162627	SNX7	TRUE	FALSE	no_overlap	NA	NA	NA	Other	NA	NA	NA
chr1	98388495	98388749	ENSG00000162627	SNX7	TRUE	TRUE	no_overlap	NA	NA	NA	Other	chr3	118063709	118063966
chr1	99969910	99970039	ENSG00000283761	AC118553.2	TRUE	TRUE	low_confidence	chr3	116712076	116712376	Other	chr3	116712203	116712335
chr1	99969910	99970039	ENSG00000283761	AC118553.2	TRUE	TRUE	low_confidence	chr3	116711258	116711381	Other	chr3	116712203	116712335
chr1	100028885	100029047	ENSG00000283761	AC118553.2	TRUE	FALSE	no_overlap	NA	NA	NA	Other	NA	NA	NA
chr1	100037947	100038145	ENSG00000156875	MFSD14A	TRUE	TRUE	low_confidence	chr3	116662522	116662802	Other	chr3	116662566	116662750
chr1	100132897	100133035	ENSG00000156876	SASS6	TRUE	TRUE	low_confidence	chr3	116594667	116595184	Other	chr3	116594895	116595029
chr1	100266007	100266269	ENSG00000137996	RTCA	TRUE	TRUE	low_confidence	chr3	116508014	116508328	Other	chr3	116508088	116508319
chr1	100352314	100352405	ENSG00000079335	CDC14A	TRUE	TRUE	low_confidence	chr3	116425027	116425227	Alternate	chr3	116424085	116424183
chr1	100352314	100352405	ENSG00000079335	CDC14A	TRUE	TRUE	low_confidence	chr3	116423735	116424083	Alternate	chr3	116424085	116424183
chr1	100352314	100352405	ENSG00000079335	CDC14A	TRUE	TRUE	low_confidence	chr3	116422681	116423017	Alternate	chr3	116424085	116424183
chr1	100394298	100394543	ENSG00000079335	CDC14A	TRUE	TRUE	low_confidence	chr3	103171583	103171958	Alternate	chr3	116390770	116390899
chr1	100396729	100396880	ENSG00000079335	CDC14A	TRUE	TRUE	no_overlap	NA	NA	NA	Alternate	chr3	116388199	116388534
chr1	100400432	100400640	ENSG00000079335	CDC14A	TRUE	TRUE	no_overlap	NA	NA	NA	Alternate	chr3	116384397	116384574
chr1	100440199	100440371	ENSG00000079335	CDC14A	TRUE	TRUE	no_overlap	NA	NA	NA	Alternate	chr3	116350805	116350966
chr1	100713094	100713310	ENSG00000162692	VCAM1	TRUE	TRUE	no_overlap	NA	NA	NA	Hs-Specific	NA	NA	NA
chr1	100896010	100896138	ENSG00000162695	SLC30A7	TRUE	TRUE	low_confidence	chr3	116007263	116007432	Other	chr3	116007338	116007453
chr1	100896010	100896138	ENSG00000162695	SLC30A7	TRUE	TRUE	low_confidence	chr3	116007103	116007221	Other	chr3	116007338	116007453
chr1	100927482	100927775	ENSG00000162695	SLC30A7	TRUE	FALSE	no_overlap	NA	NA	NA	Other	NA	NA	NA
chr1	100949610	100949745	ENSG00000162695	SLC30A7	TRUE	TRUE	no_overlap	NA	NA	NA	Other	NA	NA	NA
chr1	101005314	101005409	ENSG00000117543	DPH5	TRUE	TRUE	no_overlap	NA	NA	NA	Other	chr3	115903841	115903931
chr1	101081602	101081790	ENSG00000117543	DPH5	TRUE	TRUE	no_overlap	NA	NA	NA	Other	chr3	115845329	115845478
chr1	101112101	101112290	ENSG00000117543	DPH5	TRUE	TRUE	low_confidence	chr3	115815624	115816149	Other	chr3	115815660	115815833
chr1	101122626	101122772	ENSG00000117543	DPH5	TRUE	TRUE	no_overlap	NA	NA	NA	Other	chr3	115805590	115805734
chr1	101129010	101129161	ENSG00000117543	DPH5	TRUE	TRUE	no_overlap	NA	NA	NA	Other	chr3	115800956	115801115
chr1	101137310	101137436	ENSG00000170989	S1PR1	TRUE	TRUE	high_confidence	chr3	115793397	115793548	Conserved	chr3	115793074	115793099
chr1	101137310	101137436	ENSG00000170989	S1PR1	TRUE	TRUE	high_confidence	chr3	115793370	115793718	Conserved	chr3	115793074	115793099
chr1	101179218	101179352	ENSG00000170989	S1PR1	TRUE	TRUE	no_overlap	NA	NA	NA	Conserved	chr3	115761110	115761243
chr1	101235672	101235841	ENSG00000170989	S1PR1	TRUE	TRUE	low_confidence	chr3	115715392	115715662	Conserved	chr3	115715925	115716098
chr1	101236769	101236908	ENSG00000170989	S1PR1	TRUE	TRUE	low_confidence	chr3	115715392	115715662	Conserved	chr3	115714901	115715045
chr1	101238858	101239036	ENSG00000170989	S1PR1	TRUE	TRUE	low_confidence	chr3	115712930	115713077	Conserved	chr3	115712892	115713077
chr1	101238858	101239036	ENSG00000170989	S1PR1	TRUE	TRUE	low_confidence	chr3	115712003	115712181	Conserved	chr3	115712892	115713077
chr1	101239270	101239441	ENSG00000170989	S1PR1	TRUE	TRUE	low_confidence	chr3	115712930	115713077	Conserved	chr3	115712487	115712658
chr1	101239270	101239441	ENSG00000170989	S1PR1	TRUE	TRUE	low_confidence	chr3	115712003	115712181	Conserved	chr3	115712487	115712658
chr1	101239768	101239889	ENSG00000170989	S1PR1	TRUE	TRUE	low_confidence	chr3	115712930	115713077	Conserved	chr3	115712039	115712160
chr1	101239768	101239889	ENSG00000170989	S1PR1	TRUE	TRUE	low_confidence	chr3	115712003	115712181	Conserved	chr3	115712039	115712160
chr1	101262851	101262919	ENSG00000170989	S1PR1	TRUE	TRUE	no_overlap	NA	NA	NA	Conserved	chr3	115685233	115685308
chr1	101264753	101265075	ENSG00000170989	S1PR1	TRUE	TRUE	low_confidence	chr3	115682774	115683052	Conserved	chr3	115682723	115683079
chr1	101278930	101279134	ENSG00000170989	S1PR1	TRUE	TRUE	low_confidence	chr3	115673849	115674029	Conserved	chr3	115673852	115674046
chr1	101278930	101279134	ENSG00000170989	S1PR1	TRUE	TRUE	low_confidence	chr3	115673435	115673601	Conserved	chr3	115673852	115674046
chr1	101284169	101284344	ENSG00000170989	S1PR1	TRUE	TRUE	no_overlap	NA	NA	NA	Conserved	chr3	115664494	115664663
chr1	101291825	101291989	ENSG00000170989	S1PR1	TRUE	TRUE	no_overlap	NA	NA	NA	Conserved	chr3	115657829	115657993
chr1	101293751	101293874	ENSG00000170989	S1PR1	TRUE	TRUE	no_overlap	NA	NA	NA	Conserved	chr3	115656640	115656761
chr1	101309616	101310034	ENSG00000170989	S1PR1	TRUE	TRUE	low_confidence	chr3	115643108	115643248	Conserved	chr3	115642240	115642692
chr1	101309616	101310034	ENSG00000170989	S1PR1	TRUE	TRUE	low_confidence	chr3	115642798	115642969	Conserved	chr3	115642240	115642692
chr1	101309616	101310034	ENSG00000170989	S1PR1	TRUE	TRUE	low_confidence	chr3	115642277	115642486	Conserved	chr3	115642240	115642692
chr1	101310649	101310742	ENSG00000170989	S1PR1	TRUE	TRUE	low_confidence	chr3	115642277	115642486	Conserved	chr3	115640048	115640133
chr1	101371301	101371450	ENSG00000170989	S1PR1	TRUE	TRUE	no_overlap	NA	NA	NA	Conserved	chr3	115588069	115588217
chr1	107829503	107829616	ENSG00000134215	VAV3	TRUE	TRUE	no_overlap	NA	NA	NA	Alternate	chr3	109454692	109454803
chr1	108041869	108041963	ENSG00000134215	VAV3	TRUE	TRUE	no_overlap	NA	NA	NA	Alternate	chr3	109268405	109270437
chr1	108079750	108079878	ENSG00000085491	SLC25A24	TRUE	TRUE	low_confidence	chr3	109215813	109215933	Other	chr3	109218407	109218520
chr1	108080549	108080712	ENSG00000085491	SLC25A24	TRUE	TRUE	low_confidence	chr3	109215813	109215933	Other	chr3	109216036	109216177
chr1	108200232	108200447	ENSG00000085491	SLC25A24	TRUE	TRUE	low_confidence	chr3	109123798	109123914	Other	chr3	109122921	109123142
chr1	108200232	108200447	ENSG00000085491	SLC25A24	TRUE	TRUE	low_confidence	chr3	109123165	109123392	Other	chr3	109122921	109123142
chr1	108200232	108200447	ENSG00000085491	SLC25A24	TRUE	TRUE	low_confidence	chr3	109122953	109123065	Other	chr3	109122921	109123142
chr1	108505813	108505953	ENSG00000186086	NBPF6	FALSE	FALSE	no_overlap	NA	NA	NA	Other	NA	NA	NA
chr1	108559778	108560146	ENSG00000162636	FAM102B	TRUE	TRUE	low_confidence	chr3	109027559	109027943	Other	chr3	109027588	109027946
chr1	108591010	108591159	ENSG00000162636	FAM102B	TRUE	TRUE	low_confidence	chr3	109011640	109011749	Other	chr3	109011021	109011170
chr1	108591010	108591159	ENSG00000162636	FAM102B	TRUE	TRUE	low_confidence	chr3	109010953	109011131	Other	chr3	109011021	109011170
chr1	108644932	108645089	ENSG00000162636	FAM102B	TRUE	TRUE	no_overlap	NA	NA	NA	Other	chr3	108966272	108966407
chr1	108661124	108661175	ENSG00000162639	HENMT1	TRUE	TRUE	no_overlap	NA	NA	NA	Hs-Specific	chr3	108940392	108940448
chr1	108661407	108661535	ENSG00000162639	HENMT1	TRUE	TRUE	no_overlap	NA	NA	NA	Hs-Specific	chr3	108940040	108940162
chr1	108703505	108703733	ENSG00000134186	PRPF38B	FALSE	TRUE	no_overlap	NA	NA	NA	Other	NA	NA	NA
chr1	108746453	108746633	ENSG00000116266	STXBP3	TRUE	TRUE	low_confidence	chr3	108840269	108840755	Other	chr3	108840574	108840754
chr1	108876847	108876933	ENSG00000121957	GPSM2	TRUE	TRUE	low_confidence	chr3	108722105	108722283	Other	chr3	108722350	108722389
chr1	108956553	108956804	ENSG00000121940	CLCC1	TRUE	FALSE	no_overlap	NA	NA	NA	Other	NA	NA	NA
chr1	108956882	108957028	ENSG00000121940	CLCC1	TRUE	FALSE	no_overlap	NA	NA	NA	Other	NA	NA	NA
chr1	108961329	108961441	ENSG00000121940	CLCC1	TRUE	TRUE	no_overlap	NA	NA	NA	Other	NA	NA	NA
chr1	108963109	108963471	ENSG00000121940	CLCC1	TRUE	TRUE	low_confidence	chr3	108653767	108654156	Other	chr3	108653941	108654147
chr1	109041988	109042199	ENSG00000085433	WDR47	TRUE	TRUE	low_confidence	chr3	108591151	108591755	Other	chr3	108591283	108591471
chr1	109075951	109076137	ENSG00000197780	TAF13	TRUE	TRUE	low_confidence	chr3	108571511	108571909	Other	chr3	108571646	108571718
chr1	109090648	109090780	ENSG00000215717	TMEM167B	TRUE	TRUE	low_confidence	chr3	108562224	108562701	Conserved	chr3	108562377	108562531
chr1	109100017	109100297	ENSG00000215717	TMEM167B	TRUE	TRUE	high_confidence	chr3	108554690	108554866	Conserved	chr3	108554649	108554897
chr1	109100017	109100297	ENSG00000215717	TMEM167B	TRUE	TRUE	high_confidence	chr3	108554591	108554966	Conserved	chr3	108554649	108554897
chr1	109162389	109162577	ENSG00000116299	KIAA1324	TRUE	TRUE	no_overlap	NA	NA	NA	Alternate	chr3	108491142	108491319
chr1	109283250	109283349	ENSG00000134222	PSRC1	TRUE	TRUE	low_confidence	chr3	108383616	108383815	Other	chr3	108383624	108383729
chr1	109483873	109483998	ENSG00000162650	ATXN7L2	TRUE	TRUE	high_confidence	chr3	108210071	108210261	Conserved	chr3	108210427	108210551
chr1	109483873	109483998	ENSG00000162650	ATXN7L2	TRUE	TRUE	high_confidence	chr3	108210945	108211058	Conserved	chr3	108210427	108210551
chr1	109483873	109483998	ENSG00000162650	ATXN7L2	TRUE	TRUE	high_confidence	chr3	108210337	108210777	Conserved	chr3	108210427	108210551
chr1	109483873	109483998	ENSG00000162650	ATXN7L2	TRUE	TRUE	high_confidence	chr3	108209997	108210288	Conserved	chr3	108210427	108210551
chr1	109484154	109484327	ENSG00000162650	ATXN7L2	TRUE	TRUE	high_confidence	chr3	108210071	108210261	Conserved	chr3	108210100	108210273
chr1	109484154	109484327	ENSG00000162650	ATXN7L2	TRUE	TRUE	high_confidence	chr3	108210945	108211058	Conserved	chr3	108210100	108210273
chr1	109484154	109484327	ENSG00000162650	ATXN7L2	TRUE	TRUE	high_confidence	chr3	108210337	108210777	Conserved	chr3	108210100	108210273
chr1	109484154	109484327	ENSG00000162650	ATXN7L2	TRUE	TRUE	high_confidence	chr3	108209997	108210288	Conserved	chr3	108210100	108210273
chr1	109502382	109502502	ENSG00000174151	CYB561D1	TRUE	TRUE	no_overlap	NA	NA	NA	Other	chr3	108193652	108193749
chr1	109548425	109548692	ENSG00000065135	GNAI3	TRUE	TRUE	high_confidence	chr3	108146058	108146205	Conserved	chr3	108146033	108146284
chr1	109548425	109548692	ENSG00000065135	GNAI3	TRUE	TRUE	high_confidence	chr3	108145856	108146374	Conserved	chr3	108146033	108146284
chr1	109620972	109621062	ENSG00000116337	AMPD2	TRUE	TRUE	low_confidence	chr3	108085340	108085558	Other	chr3	108085439	108085527
chr1	109788366	109788496	ENSG00000198758	EPS8L3	TRUE	TRUE	no_overlap	NA	NA	NA	Conserved	chr3	107855368	107855495
chr1	109790777	109791037	ENSG00000198758	EPS8L3	TRUE	TRUE	high_confidence	chr3	107852871	107853023	Conserved	chr3	107852863	107853096
chr1	109790777	109791037	ENSG00000198758	EPS8L3	TRUE	TRUE	high_confidence	chr3	107853959	107854078	Conserved	chr3	107852863	107853096
chr1	109790777	109791037	ENSG00000198758	EPS8L3	TRUE	TRUE	high_confidence	chr3	107853207	107853390	Conserved	chr3	107852863	107853096
chr1	109790777	109791037	ENSG00000198758	EPS8L3	TRUE	TRUE	high_confidence	chr3	107852838	107853140	Conserved	chr3	107852863	107853096
chr1	109802229	109802576	ENSG00000198758	EPS8L3	TRUE	TRUE	high_confidence	chr3	107846193	107846495	Conserved	chr3	107846250	107846591
chr1	109802229	109802576	ENSG00000198758	EPS8L3	TRUE	TRUE	high_confidence	chr3	107846161	107846561	Conserved	chr3	107846250	107846591
chr1	109821412	109821508	ENSG00000198758	EPS8L3	TRUE	TRUE	no_overlap	NA	NA	NA	Conserved	chr3	107829658	107829743
chr1	109984563	109984662	ENSG00000168710	AHCYL1	TRUE	TRUE	low_confidence	chr3	107696165	107696857	Other	chr3	107696677	107696786
chr1	110210046	110210112	ENSG00000116396	KCNC4	TRUE	TRUE	no_overlap	NA	NA	NA	Other	chr3	107460314	107460371
chr1	110338358	110338550	ENSG00000162775	RBM15	TRUE	TRUE	low_confidence	chr3	107333960	107334141	Conserved	chr3	107333950	107334121
chr1	110338358	110338550	ENSG00000162775	RBM15	TRUE	TRUE	low_confidence	chr3	107333001	107333920	Conserved	chr3	107333950	107334121
chr1	110339971	110340109	ENSG00000162775	RBM15	TRUE	TRUE	high_confidence	chr3	107332392	107332556	Conserved	chr3	107332380	107332518
chr1	110339971	110340109	ENSG00000162775	RBM15	TRUE	TRUE	high_confidence	chr3	107333001	107333920	Conserved	chr3	107332380	107332518
chr1	110339971	110340109	ENSG00000162775	RBM15	TRUE	TRUE	high_confidence	chr3	107332216	107332727	Conserved	chr3	107332380	107332518
chr1	110407707	110407844	ENSG00000134248	LAMTOR5	TRUE	TRUE	low_confidence	chr3	107278875	107279161	Other	chr3	107278880	107278992
chr1	110619467	110619644	ENSG00000177301	KCNA2	TRUE	TRUE	low_confidence	chr3	107090912	107091033	Conserved	chr3	107090151	107090327
chr1	110619467	110619644	ENSG00000177301	KCNA2	TRUE	TRUE	low_confidence	chr3	107090032	107090271	Conserved	chr3	107090151	107090327
chr1	110619967	110620111	ENSG00000177301	KCNA2	TRUE	TRUE	low_confidence	chr3	107090032	107090271	Conserved	chr3	107089660	107089784
chr1	110631322	110631651	ENSG00000177301	KCNA2	TRUE	TRUE	high_confidence	chr3	107080858	107081127	Conserved	chr3	107080841	107081087
chr1	110631322	110631651	ENSG00000177301	KCNA2	TRUE	TRUE	high_confidence	chr3	107082000	107082188	Conserved	chr3	107080841	107081087
chr1	110631322	110631651	ENSG00000177301	KCNA2	TRUE	TRUE	high_confidence	chr3	107080842	107081158	Conserved	chr3	107080841	107081087
chr1	110636242	110636443	ENSG00000177301	KCNA2	TRUE	TRUE	high_confidence	chr3	107075719	107075869	Conserved	chr3	107074937	107075104
chr1	110636242	110636443	ENSG00000177301	KCNA2	TRUE	TRUE	high_confidence	chr3	107075649	107075890	Conserved	chr3	107074937	107075104
chr1	110641702	110642075	ENSG00000177301	KCNA2	TRUE	TRUE	no_overlap	NA	NA	NA	Conserved	NA	NA	NA
chr1	110647350	110647639	ENSG00000177301	KCNA2	TRUE	TRUE	low_confidence	chr3	107062665	107063087	Conserved	chr3	107061009	107061275
chr1	110647350	110647639	ENSG00000177301	KCNA2	TRUE	TRUE	low_confidence	chr3	107062187	107062473	Conserved	chr3	107061009	107061275
chr1	110668702	110668794	ENSG00000177272	KCNA3	TRUE	TRUE	low_confidence	chr3	107042400	107042624	Conserved	chr3	107041947	107042035
chr1	110672822	110672961	ENSG00000177272	KCNA3	TRUE	TRUE	high_confidence	chr3	107038797	107038855	Conserved	chr3	107038129	107038261
chr1	110672822	110672961	ENSG00000177272	KCNA3	TRUE	TRUE	high_confidence	chr3	107038233	107038340	Conserved	chr3	107038129	107038261
chr1	110672822	110672961	ENSG00000177272	KCNA3	TRUE	TRUE	high_confidence	chr3	107038750	107038931	Conserved	chr3	107038129	107038261
chr1	110672822	110672961	ENSG00000177272	KCNA3	TRUE	TRUE	high_confidence	chr3	107038128	107038503	Conserved	chr3	107038129	107038261
chr1	110674740	110675037	ENSG00000177272	KCNA3	TRUE	TRUE	high_confidence	chr3	107036045	107036203	Conserved	chr3	107036072	107036357
chr1	110674740	110675037	ENSG00000177272	KCNA3	TRUE	TRUE	high_confidence	chr3	107035928	107036340	Conserved	chr3	107036072	107036357
chr1	110787271	110787415	ENSG00000143119	CD53	TRUE	FALSE	no_overlap	NA	NA	NA	Conserved	NA	NA	NA
chr1	110873089	110873200	ENSG00000143119	CD53	TRUE	TRUE	low_confidence	chr3	106790066	106790410	Conserved	chr3	106790015	106790124
chr1	110874543	110874678	ENSG00000143119	CD53	TRUE	TRUE	high_confidence	chr3	106788625	106788850	Conserved	chr3	106788718	106788839
chr1	110874543	110874678	ENSG00000143119	CD53	TRUE	TRUE	high_confidence	chr3	106788610	106788907	Conserved	chr3	106788718	106788839
chr1	110874543	110874678	ENSG00000143119	CD53	TRUE	TRUE	high_confidence	chr3	106788020	106788272	Conserved	chr3	106788718	106788839
chr1	110875298	110875606	ENSG00000143119	CD53	TRUE	TRUE	high_confidence	chr3	106788625	106788850	Conserved	chr3	106787829	106788113
chr1	110875298	110875606	ENSG00000143119	CD53	TRUE	TRUE	high_confidence	chr3	106788610	106788907	Conserved	chr3	106787829	106788113
chr1	110875298	110875606	ENSG00000143119	CD53	TRUE	TRUE	high_confidence	chr3	106788020	106788272	Conserved	chr3	106787829	106788113
chr1	110880062	110880265	ENSG00000143119	CD53	TRUE	TRUE	high_confidence	chr3	106785069	106785418	Conserved	chr3	106785203	106785425
chr1	110880062	110880265	ENSG00000143119	CD53	TRUE	TRUE	high_confidence	chr3	106785033	106785510	Conserved	chr3	106785203	106785425
chr1	110880827	110880970	ENSG00000143119	CD53	TRUE	TRUE	high_confidence	chr3	106785069	106785418	Conserved	NA	NA	NA
chr1	110880827	110880970	ENSG00000143119	CD53	TRUE	TRUE	high_confidence	chr3	106785033	106785510	Conserved	NA	NA	NA
chr1	110881156	110881253	ENSG00000143119	CD53	TRUE	TRUE	high_confidence	chr3	106785069	106785418	Conserved	NA	NA	NA
chr1	110881156	110881253	ENSG00000143119	CD53	TRUE	TRUE	high_confidence	chr3	106785033	106785510	Conserved	NA	NA	NA
chr1	110917003	110917093	ENSG00000143119	CD53	TRUE	FALSE	no_overlap	NA	NA	NA	Conserved	NA	NA	NA
chr1	110982466	110982581	ENSG00000121931	LRIF1	TRUE	FALSE	no_overlap	NA	NA	NA	Other	NA	NA	NA
chr1	111199405	111199520	ENSG00000162777	DENND2D	TRUE	TRUE	low_confidence	chr3	106487156	106487268	Conserved	chr3	106487155	106487252
chr1	111200637	111200749	ENSG00000162777	DENND2D	TRUE	TRUE	high_confidence	chr3	106485933	106486078	Conserved	chr3	106485971	106486083
chr1	111200637	111200749	ENSG00000162777	DENND2D	TRUE	TRUE	high_confidence	chr3	106485903	106486115	Conserved	chr3	106485971	106486083
chr1	111203855	111204161	ENSG00000064886	CHI3L2	FALSE	TRUE	high_confidence	chr3	106483921	106484074	Other	chr3	106482826	106483072
chr1	111203855	111204161	ENSG00000064886	CHI3L2	FALSE	TRUE	high_confidence	chr3	106483851	106484124	Other	chr3	106482826	106483072
chr1	111203855	111204161	ENSG00000064886	CHI3L2	FALSE	TRUE	high_confidence	chr3	106482333	106482563	Other	chr3	106482826	106483072
chr1	111204348	111204670	ENSG00000064886	CHI3L2	FALSE	TRUE	low_confidence	chr3	106482333	106482563	Other	chr3	106482339	106482661
chr1	111215826	111216339	ENSG00000064886	CHI3L2	FALSE	TRUE	high_confidence	chr3	106462007	106462127	Other	chr3	106462021	106462463
chr1	111215826	111216339	ENSG00000064886	CHI3L2	FALSE	TRUE	high_confidence	chr3	106462623	106462861	Other	chr3	106462021	106462463
chr1	111215826	111216339	ENSG00000064886	CHI3L2	FALSE	TRUE	high_confidence	chr3	106462231	106462472	Other	chr3	106462021	106462463
chr1	111215826	111216339	ENSG00000064886	CHI3L2	FALSE	TRUE	high_confidence	chr3	106461980	106462210	Other	chr3	106462021	106462463
chr1	111219967	111220153	ENSG00000064886	CHI3L2	FALSE	FALSE	no_overlap	NA	NA	NA	Other	NA	NA	NA
chr1	111221799	111221923	ENSG00000064886	CHI3L2	FALSE	TRUE	high_confidence	chr3	106449565	106449893	Other	chr3	106449620	106449746
chr1	111221799	111221923	ENSG00000064886	CHI3L2	FALSE	TRUE	high_confidence	chr3	106449454	106449968	Other	chr3	106449620	106449746
chr1	111406424	111406569	ENSG00000085465	OVGP1	TRUE	FALSE	no_overlap	NA	NA	NA	Other	NA	NA	NA
chr1	111471118	111471360	ENSG00000143110	C1orf162	TRUE	TRUE	no_overlap	NA	NA	NA	Other	chr3	105936549	105936666
chr1	111475755	111475947	ENSG00000143110	C1orf162	TRUE	TRUE	no_overlap	NA	NA	NA	Other	NA	NA	NA
chr1	111476795	111476924	ENSG00000143110	C1orf162	TRUE	TRUE	no_overlap	NA	NA	NA	Other	chr3	105927911	105928025
chr1	111477071	111477325	ENSG00000143110	C1orf162	TRUE	TRUE	no_overlap	NA	NA	NA	Other	chr3	105927250	105927634
chr1	111507388	111507795	ENSG00000121933	TMIGD3	TRUE	TRUE	low_confidence	chr3	105900848	105901174	Other	chr3	105900832	105901195
chr1	111507388	111507795	ENSG00000121933	TMIGD3	TRUE	TRUE	low_confidence	chr3	105900323	105900474	Other	chr3	105900832	105901195
chr1	111507388	111507795	ENSG00000121933	TMIGD3	TRUE	TRUE	low_confidence	chr3	105899824	105900038	Other	chr3	105900832	105901195
chr1	111592895	111593258	ENSG00000116473	RAP1A	TRUE	TRUE	high_confidence	chr3	105825607	105825881	Conserved	chr3	105825525	105825838
chr1	111592895	111593258	ENSG00000116473	RAP1A	TRUE	TRUE	high_confidence	chr3	105825546	105826048	Conserved	chr3	105825525	105825838
chr1	111596644	111596761	ENSG00000116473	RAP1A	TRUE	TRUE	no_overlap	NA	NA	NA	Conserved	chr3	105821396	105821495
chr1	111598543	111598821	ENSG00000116473	RAP1A	TRUE	TRUE	no_overlap	NA	NA	NA	Conserved	NA	NA	NA
chr1	111604035	111604352	ENSG00000116473	RAP1A	TRUE	TRUE	high_confidence	chr3	105815321	105815536	Conserved	chr3	105815309	105815582
chr1	111604035	111604352	ENSG00000116473	RAP1A	TRUE	TRUE	high_confidence	chr3	105815217	105815608	Conserved	chr3	105815309	105815582
chr1	111747392	111747493	ENSG00000284755	AL049557.1	FALSE	TRUE	no_overlap	NA	NA	NA	Other	chr3	105697517	105697823
chr1	111755508	111755620	ENSG00000064703	DDX20	TRUE	TRUE	high_confidence	chr3	105687592	105687714	Conserved	chr3	105687734	105687845
chr1	111755508	111755620	ENSG00000064703	DDX20	TRUE	TRUE	high_confidence	chr3	105687207	105687961	Conserved	chr3	105687734	105687845
chr1	111755767	111755938	ENSG00000064703	DDX20	TRUE	TRUE	high_confidence	chr3	105687592	105687714	Conserved	chr3	105687411	105687589
chr1	111755767	111755938	ENSG00000064703	DDX20	TRUE	TRUE	high_confidence	chr3	105687207	105687961	Conserved	chr3	105687411	105687589
chr1	112466261	112466355	ENSG00000134245	WNT2B	TRUE	TRUE	low_confidence	chr3	104992736	104993012	Other	chr3	104992884	104992977
chr1	112619692	112619848	ENSG00000116489	CAPZA1	FALSE	TRUE	low_confidence	chr3	104865409	104865533	Other	chr3	104864375	104864527
chr1	112619692	112619848	ENSG00000116489	CAPZA1	FALSE	TRUE	low_confidence	chr3	104864229	104864679	Other	chr3	104864375	104864527
chr1	112619692	112619848	ENSG00000116489	CAPZA1	FALSE	TRUE	low_confidence	chr3	104863732	104864012	Other	chr3	104864375	104864527
chr1	112705014	112705124	ENSG00000271810	AL603832.3	FALSE	TRUE	no_overlap	NA	NA	NA	Other	chr3	104790880	104790945
chr1	112956237	112956464	ENSG00000155380	SLC16A1	TRUE	TRUE	low_confidence	chr3	104639087	104639302	Other	chr3	104638426	104638626
chr1	112956237	112956464	ENSG00000155380	SLC16A1	TRUE	TRUE	low_confidence	chr3	104638457	104638749	Other	chr3	104638426	104638626
chr1	113046697	113046893	ENSG00000198799	LRIG2	TRUE	TRUE	no_overlap	NA	NA	NA	Other	NA	NA	NA
chr1	113812383	113812672	ENSG00000081019	RSBN1	TRUE	TRUE	high_confidence	chr3	103914375	103914512	Conserved	chr3	103914172	103914477
chr1	113812383	113812672	ENSG00000081019	RSBN1	TRUE	TRUE	high_confidence	chr3	103914148	103914628	Conserved	chr3	103914172	103914477
chr1	113859612	113859742	ENSG00000134242	PTPN22	TRUE	TRUE	high_confidence	chr3	103872688	103872928	Conserved	chr3	103872664	103872781
chr1	113859612	113859742	ENSG00000134242	PTPN22	TRUE	TRUE	high_confidence	chr3	103872596	103873079	Conserved	chr3	103872664	103872781
chr1	113871635	113871900	ENSG00000134242	PTPN22	TRUE	TRUE	high_confidence	chr3	103860102	103860386	Conserved	chr3	103860134	103860392
chr1	113871635	113871900	ENSG00000134242	PTPN22	TRUE	TRUE	high_confidence	chr3	103859926	103860424	Conserved	chr3	103860134	103860392
chr1	113904751	113905344	ENSG00000118655	DCLRE1B	TRUE	TRUE	low_confidence	chr3	103809581	103809798	Other	chr3	103809348	103809910
chr1	113904751	113905344	ENSG00000118655	DCLRE1B	TRUE	TRUE	low_confidence	chr3	103809283	103809506	Other	chr3	103809348	103809910
chr1	113904751	113905344	ENSG00000118655	DCLRE1B	TRUE	TRUE	low_confidence	chr3	103808909	103809177	Other	chr3	103809348	103809910
chr1	113929516	113929677	ENSG00000163349	HIPK1	TRUE	TRUE	high_confidence	chr3	103791305	103791483	Conserved	chr3	103791250	103791409
chr1	113929516	113929677	ENSG00000163349	HIPK1	TRUE	TRUE	high_confidence	chr3	103791184	103791596	Conserved	chr3	103791250	103791409
chr1	113975750	113975828	ENSG00000163349	HIPK1	TRUE	TRUE	no_overlap	NA	NA	NA	Conserved	chr3	103741714	103741790
chr1	114330607	114330696	ENSG00000197323	TRIM33	TRUE	TRUE	no_overlap	NA	NA	NA	Other	NA	NA	NA
chr1	114334390	114334616	ENSG00000197323	TRIM33	TRUE	TRUE	no_overlap	NA	NA	NA	Other	chr3	103389646	103389803
chr1	114341340	114341594	ENSG00000197323	TRIM33	TRUE	TRUE	low_confidence	chr3	103385494	103385761	Other	NA	NA	NA
chr1	114342381	114342662	ENSG00000197323	TRIM33	TRUE	TRUE	low_confidence	chr3	103385494	103385761	Other	chr3	103385518	103385765
chr1	114342381	114342662	ENSG00000197323	TRIM33	TRUE	TRUE	low_confidence	chr3	103384805	103385111	Other	chr3	103385518	103385765
chr1	114346611	114346782	ENSG00000197323	TRIM33	TRUE	TRUE	low_confidence	chr3	103383279	103383483	Other	chr3	103383322	103383478
chr1	114716741	114716937	ENSG00000009307	CSDE1	TRUE	TRUE	low_confidence	chr3	103058149	103058481	Conserved	chr3	103058165	103058357
chr1	114757520	114757637	ENSG00000009307	CSDE1	TRUE	TRUE	high_confidence	chr3	103020950	103021063	Conserved	chr3	103020969	103021085
chr1	114757520	114757637	ENSG00000009307	CSDE1	TRUE	TRUE	high_confidence	chr3	103021176	103021371	Conserved	chr3	103020969	103021085
chr1	114757520	114757637	ENSG00000009307	CSDE1	TRUE	TRUE	high_confidence	chr3	103020874	103021137	Conserved	chr3	103020969	103021085
chr1	114757520	114757637	ENSG00000009307	CSDE1	TRUE	TRUE	high_confidence	chr3	103020256	103020667	Conserved	chr3	103020969	103021085
chr1	114780765	114780858	ENSG00000052723	SIKE1	TRUE	TRUE	high_confidence	chr3	102995648	102995751	Conserved	chr3	102995591	102995659
chr1	114780765	114780858	ENSG00000052723	SIKE1	TRUE	TRUE	high_confidence	chr3	102996009	102996182	Conserved	chr3	102995591	102995659
chr1	114780765	114780858	ENSG00000052723	SIKE1	TRUE	TRUE	high_confidence	chr3	102995561	102995953	Conserved	chr3	102995591	102995659
chr1	114780765	114780858	ENSG00000052723	SIKE1	TRUE	TRUE	high_confidence	chr3	102995365	102995505	Conserved	chr3	102995591	102995659
chr1	115062724	115063033	ENSG00000134198	TSPAN2	TRUE	TRUE	high_confidence	chr3	102755765	102756079	Conserved	chr3	102755684	102756034
chr1	115062724	115063033	ENSG00000134198	TSPAN2	TRUE	TRUE	high_confidence	chr3	102755710	102756141	Conserved	chr3	102755684	102756034
chr1	115099106	115099214	ENSG00000134198	TSPAN2	TRUE	TRUE	low_confidence	chr3	102724862	102725030	Conserved	chr3	102724916	102725026
chr1	115099106	115099214	ENSG00000134198	TSPAN2	TRUE	TRUE	low_confidence	chr3	102723974	102724083	Conserved	chr3	102724916	102725026
chr1	115641901	115641987	ENSG00000173218	VANGL1	TRUE	TRUE	no_overlap	NA	NA	NA	Hs-Specific	chr3	102204608	102204693
chr1	115642745	115642836	ENSG00000173218	VANGL1	TRUE	TRUE	no_overlap	NA	NA	NA	Hs-Specific	chr3	102203864	102203958
chr1	115649041	115649167	ENSG00000173218	VANGL1	TRUE	TRUE	no_overlap	NA	NA	NA	Hs-Specific	chr3	102199293	102199422
chr1	116152120	116152260	ENSG00000173212	MAB21L3	TRUE	TRUE	low_confidence	chr3	101806217	101806483	Other	chr3	101806334	101806470
chr1	116325959	116326089	ENSG00000163399	ATP1A1	TRUE	TRUE	no_overlap	NA	NA	NA	Other	NA	NA	NA
chr1	116373222	116373344	ENSG00000163399	ATP1A1	TRUE	TRUE	low_confidence	chr3	101604555	101604857	Other	chr3	101604576	101604686
chr1	116373222	116373344	ENSG00000163399	ATP1A1	TRUE	TRUE	low_confidence	chr3	101604142	101604286	Other	chr3	101604576	101604686
chr1	116418574	116418712	ENSG00000163399	ATP1A1	TRUE	TRUE	no_overlap	NA	NA	NA	Other	NA	NA	NA
chr1	116504438	116504763	ENSG00000116815	CD58	FALSE	FALSE	no_overlap	NA	NA	NA	Other	NA	NA	NA
chr1	116515069	116515358	ENSG00000116815	CD58	FALSE	FALSE	no_overlap	NA	NA	NA	Other	NA	NA	NA
chr1	116515800	116515954	ENSG00000116815	CD58	FALSE	FALSE	no_overlap	NA	NA	NA	Other	NA	NA	NA
chr1	116570380	116570576	ENSG00000116815	CD58	FALSE	FALSE	no_overlap	NA	NA	NA	Other	NA	NA	NA
chr1	116570960	116571224	ENSG00000116815	CD58	FALSE	TRUE	no_overlap	NA	NA	NA	Other	NA	NA	NA
chr1	116737637	116737747	ENSG00000116824	CD2	TRUE	TRUE	high_confidence	chr3	101296599	101296710	Conserved	chr3	101294305	101295547
chr1	116737637	116737747	ENSG00000116824	CD2	TRUE	TRUE	high_confidence	chr3	101293891	101294013	Conserved	chr3	101294305	101295547
chr1	116737637	116737747	ENSG00000116824	CD2	TRUE	TRUE	high_confidence	chr3	101296576	101296722	Conserved	chr3	101294305	101295547
chr1	116737637	116737747	ENSG00000116824	CD2	TRUE	TRUE	high_confidence	chr3	101295595	101295775	Conserved	chr3	101294305	101295547
chr1	116737637	116737747	ENSG00000116824	CD2	TRUE	TRUE	high_confidence	chr3	101293849	101294047	Conserved	chr3	101294305	101295547
chr1	116738873	116739196	ENSG00000116824	CD2	TRUE	TRUE	high_confidence	chr3	101293891	101294013	Conserved	NA	NA	NA
chr1	116738873	116739196	ENSG00000116824	CD2	TRUE	TRUE	high_confidence	chr3	101293849	101294047	Conserved	NA	NA	NA
chr1	116769709	116769981	ENSG00000116824	CD2	TRUE	TRUE	high_confidence	chr3	101274907	101275012	Conserved	chr3	101274860	101275105
chr1	116769709	116769981	ENSG00000116824	CD2	TRUE	TRUE	high_confidence	chr3	101274847	101275136	Conserved	chr3	101274860	101275105
chr1	116799672	116799793	ENSG00000116824	CD2	TRUE	FALSE	no_overlap	NA	NA	NA	Conserved	NA	NA	NA
chr1	116816524	116816680	ENSG00000116824	CD2	TRUE	TRUE	low_confidence	chr3	101226960	101227123	Conserved	chr3	101227013	101227169
chr1	116878106	116878281	ENSG00000134247	PTGFRN	TRUE	TRUE	no_overlap	NA	NA	NA	Other	chr3	101145810	101145990
chr1	117059393	117059494	ENSG00000116830	TTF2	TRUE	TRUE	low_confidence	chr3	100969612	100969943	Other	chr3	100970148	100970243
chr1	117366712	117366861	ENSG00000198162	MAN1A2	TRUE	TRUE	low_confidence	chr3	100685823	100686159	Other	chr3	100685957	100686080
chr1	117366712	117366861	ENSG00000198162	MAN1A2	TRUE	TRUE	low_confidence	chr3	100685211	100685608	Other	chr3	100685957	100686080
chr1	117367374	117367510	ENSG00000198162	MAN1A2	TRUE	TRUE	low_confidence	chr3	100685823	100686159	Other	chr3	100685431	100685498
chr1	117367374	117367510	ENSG00000198162	MAN1A2	TRUE	TRUE	low_confidence	chr3	100685211	100685608	Other	chr3	100685431	100685498
chr1	117605957	117606151	ENSG00000183508	TENT5C	TRUE	TRUE	high_confidence	chr3	100489932	100490098	Conserved	chr3	100489096	100489305
chr1	117605957	117606151	ENSG00000183508	TENT5C	TRUE	TRUE	high_confidence	chr3	100489848	100490144	Conserved	chr3	100489096	100489305
chr1	117605957	117606151	ENSG00000183508	TENT5C	TRUE	TRUE	high_confidence	chr3	100489342	100489645	Conserved	chr3	100489096	100489305
chr1	117605957	117606151	ENSG00000183508	TENT5C	TRUE	TRUE	high_confidence	chr3	100489041	100489229	Conserved	chr3	100489096	100489305
chr1	117605957	117606151	ENSG00000183508	TENT5C	TRUE	TRUE	high_confidence	chr3	100488462	100488664	Conserved	chr3	100489096	100489305
chr1	117606874	117607061	ENSG00000183508	TENT5C	TRUE	TRUE	low_confidence	chr3	100489342	100489645	Conserved	chr3	100488360	100488550
chr1	117606874	117607061	ENSG00000183508	TENT5C	TRUE	TRUE	low_confidence	chr3	100489041	100489229	Conserved	chr3	100488360	100488550
chr1	117606874	117607061	ENSG00000183508	TENT5C	TRUE	TRUE	low_confidence	chr3	100488462	100488664	Conserved	chr3	100488360	100488550
chr1	117607572	117607811	ENSG00000183508	TENT5C	TRUE	TRUE	low_confidence	chr3	100488462	100488664	Conserved	chr3	100487716	100487942
chr1	117608806	117608956	ENSG00000183508	TENT5C	TRUE	TRUE	no_overlap	NA	NA	NA	Conserved	chr3	100486720	100486854
chr1	117615552	117615764	ENSG00000183508	TENT5C	TRUE	TRUE	low_confidence	chr3	100480276	100480394	Conserved	chr3	100479703	100479944
chr1	117656260	117656584	ENSG00000183508	TENT5C	TRUE	TRUE	low_confidence	chr3	100442879	100443191	Conserved	NA	NA	NA
chr1	117658764	117659058	ENSG00000183508	TENT5C	TRUE	TRUE	low_confidence	chr3	100438544	100438724	Conserved	chr3	100439543	100439809
chr1	117661099	117661350	ENSG00000183508	TENT5C	TRUE	TRUE	low_confidence	chr3	100438544	100438724	Conserved	chr3	100437621	100437863
chr1	117664412	117664678	ENSG00000183508	TENT5C	TRUE	TRUE	high_confidence	chr3	100436696	100437156	Conserved	chr3	100436855	100437100
chr1	117664412	117664678	ENSG00000183508	TENT5C	TRUE	TRUE	high_confidence	chr3	100436660	100437172	Conserved	chr3	100436855	100437100
chr1	117674688	117674803	ENSG00000183508	TENT5C	TRUE	TRUE	no_overlap	NA	NA	NA	Conserved	NA	NA	NA
chr1	117754237	117754303	ENSG00000196505	GDAP2	TRUE	TRUE	no_overlap	NA	NA	NA	Other	chr3	100363743	100363801
chr1	119139531	119139680	ENSG00000116874	WARS2	TRUE	TRUE	high_confidence	chr3	99141332	99141493	Conserved	chr3	99141968	99142118
chr1	119139531	119139680	ENSG00000116874	WARS2	TRUE	TRUE	high_confidence	chr3	99141014	99141791	Conserved	chr3	99141968	99142118
chr1	119758717	119758891	ENSG00000134240	HMGCS2	TRUE	TRUE	no_overlap	NA	NA	NA	Other	NA	NA	NA
chr1	120069567	120069874	ENSG00000134250	NOTCH2	TRUE	TRUE	low_confidence	chr3	98013157	98013813	Other	chr3	98013343	98013574
chr1	120088094	120088212	ENSG00000134250	NOTCH2	TRUE	TRUE	no_overlap	NA	NA	NA	Other	chr3	97994088	97994198
chr1	120132097	120132194	ENSG00000265808	SEC22B	TRUE	TRUE	low_confidence	chr3	97942731	97942892	Conserved	chr3	97942309	97942398
chr1	120142846	120143160	ENSG00000265808	SEC22B	TRUE	TRUE	high_confidence	chr3	97932345	97932492	Conserved	chr3	97932201	97932487
chr1	120142846	120143160	ENSG00000265808	SEC22B	TRUE	TRUE	high_confidence	chr3	97933364	97933509	Conserved	chr3	97932201	97932487
chr1	120142846	120143160	ENSG00000265808	SEC22B	TRUE	TRUE	high_confidence	chr3	97932209	97932503	Conserved	chr3	97932201	97932487
chr1	120340654	120340799	ENSG00000265808	SEC22B	TRUE	TRUE	high_confidence	chr13	117024101	117024262	Conserved	chr13	117024074	117024218
chr1	120340654	120340799	ENSG00000265808	SEC22B	TRUE	TRUE	high_confidence	chr13	117024052	117024774	Conserved	chr13	117024074	117024218
chr1	120340654	120340799	ENSG00000265808	SEC22B	TRUE	TRUE	high_confidence	chr13	117025109	117025236	Conserved	chr13	117024074	117024218
chr1	120350818	120350843	ENSG00000265808	SEC22B	TRUE	FALSE	no_overlap	NA	NA	NA	Conserved	NA	NA	NA
chr1	120357219	120357319	ENSG00000265808	SEC22B	TRUE	FALSE	no_overlap	NA	NA	NA	Conserved	NA	NA	NA
chr1	120415710	120415993	ENSG00000265808	SEC22B	TRUE	TRUE	low_confidence	chr5	107868849	107869090	Conserved	chr5	107868335	107868565
chr1	120415710	120415993	ENSG00000265808	SEC22B	TRUE	TRUE	low_confidence	chr5	107868369	107868666	Conserved	chr5	107868335	107868565
chr1	120534768	120534858	ENSG00000273136	NBPF26	FALSE	TRUE	no_overlap	NA	NA	NA	Other	chr3	97745808	97745884
chr1	120561988	120562142	ENSG00000273136	NBPF26	FALSE	TRUE	no_overlap	NA	NA	NA	Other	chr3	97770605	97771813
chr1	120723785	120723935	ENSG00000273136	NBPF26	FALSE	TRUE	low_confidence	chr3	98013157	98013813	Other	chr3	98013399	98013527
chr1	120846723	120846960	ENSG00000273136	NBPF26	FALSE	FALSE	no_overlap	NA	NA	NA	Other	NA	NA	NA
chr1	120849604	120849714	ENSG00000273136	NBPF26	FALSE	FALSE	no_overlap	NA	NA	NA	Other	NA	NA	NA
chr1	120850683	120850833	ENSG00000273136	NBPF26	FALSE	FALSE	no_overlap	NA	NA	NA	Other	NA	NA	NA
chr1	120858322	120858468	ENSG00000273136	NBPF26	FALSE	TRUE	no_overlap	NA	NA	NA	Other	chr13	117083299	117083430
chr1	120891643	120891913	ENSG00000263353	PPIAL4A	FALSE	TRUE	high_confidence	chr13	117048443	117048669	Other	chr13	117048532	117048781
chr1	120891643	120891913	ENSG00000263353	PPIAL4A	FALSE	TRUE	high_confidence	chr13	117048354	117048835	Other	chr13	117048532	117048781
chr1	120913992	120914087	ENSG00000263353	PPIAL4A	FALSE	TRUE	high_confidence	chr13	117024101	117024262	Other	chr13	117024494	117024605
chr1	120913992	120914087	ENSG00000263353	PPIAL4A	FALSE	TRUE	high_confidence	chr13	117025372	117025527	Other	chr13	117024494	117024605
chr1	120913992	120914087	ENSG00000263353	PPIAL4A	FALSE	TRUE	high_confidence	chr13	117025109	117025236	Other	chr13	117024494	117024605
chr1	120913992	120914087	ENSG00000263353	PPIAL4A	FALSE	TRUE	high_confidence	chr13	117024052	117024774	Other	chr13	117024494	117024605
chr1	120914371	120914557	ENSG00000263353	PPIAL4A	FALSE	TRUE	high_confidence	chr13	117024101	117024262	Other	chr13	117024028	117024216
chr1	120914371	120914557	ENSG00000263353	PPIAL4A	FALSE	TRUE	high_confidence	chr13	117025109	117025236	Other	chr13	117024028	117024216
chr1	120914371	120914557	ENSG00000263353	PPIAL4A	FALSE	TRUE	high_confidence	chr13	117024052	117024774	Other	chr13	117024028	117024216
chr1	121184519	121184686	ENSG00000188610	FAM72B	FALSE	TRUE	low_confidence	chr1	131527394	131528112	Other	chr1	131527651	131527798
chr1	121184519	121184686	ENSG00000188610	FAM72B	FALSE	TRUE	low_confidence	chr1	131526986	131527110	Other	chr1	131527651	131527798
chr1	121184519	121184686	ENSG00000188610	FAM72B	FALSE	TRUE	low_confidence	chr1	131526499	131526818	Other	chr1	131527651	131527798
chr1	121263782	121263873	ENSG00000171943	SRGAP2C	FALSE	TRUE	low_confidence	chr1	131446630	131446911	Other	chr1	131446872	131446947
chr1	121270036	121270224	ENSG00000171943	SRGAP2C	FALSE	FALSE	no_overlap	NA	NA	NA	Other	NA	NA	NA
chr1	121396385	121396583	ENSG00000171943	SRGAP2C	FALSE	TRUE	high_confidence	chr11	79146397	79146595	Other	NA	NA	NA
chr1	121396385	121396583	ENSG00000171943	SRGAP2C	FALSE	TRUE	high_confidence	chr11	79146319	79146694	Other	NA	NA	NA
chr1	121396385	121396583	ENSG00000171943	SRGAP2C	FALSE	TRUE	high_confidence	chr11	79146157	79146266	Other	NA	NA	NA
chr1	121396385	121396583	ENSG00000171943	SRGAP2C	FALSE	TRUE	high_confidence	chr11	79145576	79145843	Other	NA	NA	NA
chr1	121516693	121516910	ENSG00000171943	SRGAP2C	FALSE	TRUE	no_overlap	NA	NA	NA	Other	chr13	117216272	117216350
chr1	121519066	121519229	ENSG00000171943	SRGAP2C	FALSE	TRUE	low_confidence	chr13	117220496	117220861	Other	chr13	117220565	117220735
chr1	121519066	121519229	ENSG00000171943	SRGAP2C	FALSE	TRUE	low_confidence	chr13	117221058	117221197	Other	chr13	117220565	117220735
chr1	121519516	121519615	ENSG00000171943	SRGAP2C	FALSE	TRUE	low_confidence	chr13	117220496	117220861	Other	chr13	117221029	117221119
chr1	121519516	121519615	ENSG00000171943	SRGAP2C	FALSE	TRUE	low_confidence	chr13	117221058	117221197	Other	chr13	117221029	117221119
chr1	121551622	121551789	ENSG00000171943	SRGAP2C	FALSE	TRUE	low_confidence	chr13	117242217	117242406	Other	chr13	117242229	117242389
chr1	121551622	121551789	ENSG00000171943	SRGAP2C	FALSE	TRUE	low_confidence	chr13	117242654	117242845	Other	chr13	117242229	117242389
chr1	143729378	143729608	ENSG00000203818	HIST2H3PS2	FALSE	FALSE	no_overlap	NA	NA	NA	Other	NA	NA	NA
chr1	143972649	143972757	ENSG00000263513	FAM72C	FALSE	TRUE	low_confidence	chr1	131527394	131528112	Other	chr1	131527242	131527340
chr1	143972649	143972757	ENSG00000263513	FAM72C	FALSE	TRUE	low_confidence	chr1	131526986	131527110	Other	chr1	131527242	131527340
chr1	143972649	143972757	ENSG00000263513	FAM72C	FALSE	TRUE	low_confidence	chr1	131526499	131526818	Other	chr1	131527242	131527340
chr1	144371615	144371943	ENSG00000271567	PPIAL4E	FALSE	TRUE	high_confidence	chr13	117048443	117048669	Other	chr13	117048516	117048960
chr1	144371615	144371943	ENSG00000271567	PPIAL4E	FALSE	TRUE	high_confidence	chr13	117048354	117048835	Other	chr13	117048516	117048960
chr1	144412519	144412904	ENSG00000266338	NBPF15	FALSE	FALSE	no_overlap	NA	NA	NA	Other	NA	NA	NA
chr1	144413812	144413994	ENSG00000266338	NBPF15	FALSE	FALSE	no_overlap	NA	NA	NA	Other	NA	NA	NA
chr1	144416626	144416833	ENSG00000266338	NBPF15	FALSE	FALSE	no_overlap	NA	NA	NA	Other	NA	NA	NA
chr1	144419215	144419316	ENSG00000266338	NBPF15	FALSE	FALSE	no_overlap	NA	NA	NA	Other	NA	NA	NA
chr1	144460727	144460949	ENSG00000266338	NBPF15	FALSE	TRUE	low_confidence	chr5	107868369	107868666	Other	chr5	107868383	107868548
chr1	144460727	144460949	ENSG00000266338	NBPF15	FALSE	TRUE	low_confidence	chr5	107868849	107869090	Other	chr5	107868383	107868548
chr1	144521714	144521819	ENSG00000266338	NBPF15	FALSE	FALSE	no_overlap	NA	NA	NA	Other	NA	NA	NA
chr1	144523902	144523962	ENSG00000266338	NBPF15	FALSE	FALSE	no_overlap	NA	NA	NA	Other	NA	NA	NA
chr1	144546542	144546560	ENSG00000279782	PPIAL4F	FALSE	FALSE	no_overlap	NA	NA	NA	Other	NA	NA	NA
chr1	144560626	144560876	ENSG00000279782	PPIAL4F	FALSE	FALSE	no_overlap	NA	NA	NA	Other	NA	NA	NA
chr1	144567525	144567643	ENSG00000279782	PPIAL4F	FALSE	FALSE	no_overlap	NA	NA	NA	Other	NA	NA	NA
chr1	144570045	144570220	ENSG00000279782	PPIAL4F	FALSE	FALSE	no_overlap	NA	NA	NA	Other	NA	NA	NA
chr1	144594551	144594910	ENSG00000279782	PPIAL4F	FALSE	TRUE	high_confidence	chr13	117048443	117048669	Other	chr13	117048518	117048982
chr1	144594551	144594910	ENSG00000279782	PPIAL4F	FALSE	TRUE	high_confidence	chr13	117048354	117048835	Other	chr13	117048518	117048982
chr1	144930249	144930400	ENSG00000196369	SRGAP2B	FALSE	TRUE	no_overlap	NA	NA	NA	Other	chr1	131389049	131389183
chr1	145016308	145016494	ENSG00000196369	SRGAP2B	FALSE	TRUE	low_confidence	chr1	131446630	131446911	Other	chr1	131446804	131446932
chr1	145214534	145214708	ENSG00000256374	PPIAL4D	FALSE	TRUE	high_confidence	chr13	117024101	117024262	Other	chr13	117024030	117024206
chr1	145214534	145214708	ENSG00000256374	PPIAL4D	FALSE	TRUE	high_confidence	chr13	117024052	117024774	Other	chr13	117024030	117024206
chr1	145214534	145214708	ENSG00000256374	PPIAL4D	FALSE	TRUE	high_confidence	chr13	117025109	117025236	Other	chr13	117024030	117024206
chr1	145214872	145215027	ENSG00000256374	PPIAL4D	FALSE	TRUE	high_confidence	chr13	117024101	117024262	Other	chr13	117024367	117024519
chr1	145214872	145215027	ENSG00000256374	PPIAL4D	FALSE	TRUE	high_confidence	chr13	117024052	117024774	Other	chr13	117024367	117024519
chr1	145214872	145215027	ENSG00000256374	PPIAL4D	FALSE	TRUE	high_confidence	chr13	117025109	117025236	Other	chr13	117024367	117024519
chr1	145214872	145215027	ENSG00000256374	PPIAL4D	FALSE	TRUE	high_confidence	chr13	117025372	117025527	Other	chr13	117024367	117024519
chr1	145215963	145216175	ENSG00000256374	PPIAL4D	FALSE	TRUE	low_confidence	chr13	117024052	117024774	Other	chr13	117025501	117025734
chr1	145215963	145216175	ENSG00000256374	PPIAL4D	FALSE	TRUE	low_confidence	chr13	117025109	117025236	Other	chr13	117025501	117025734
chr1	145215963	145216175	ENSG00000256374	PPIAL4D	FALSE	TRUE	low_confidence	chr13	117025372	117025527	Other	chr13	117025501	117025734
chr1	145240189	145240481	ENSG00000256374	PPIAL4D	FALSE	TRUE	high_confidence	chr13	117048443	117048669	Other	chr13	117048550	117048958
chr1	145240189	145240481	ENSG00000256374	PPIAL4D	FALSE	TRUE	high_confidence	chr13	117048354	117048835	Other	chr13	117048550	117048958
chr1	145272976	145273076	ENSG00000162825	NBPF20	FALSE	TRUE	no_overlap	NA	NA	NA	Other	chr13	117083309	117083400
chr1	145281073	145281509	ENSG00000162825	NBPF20	FALSE	FALSE	no_overlap	NA	NA	NA	Other	NA	NA	NA
chr1	145282347	145282533	ENSG00000162825	NBPF20	FALSE	FALSE	no_overlap	NA	NA	NA	Other	NA	NA	NA
chr1	145285171	145285355	ENSG00000162825	NBPF20	FALSE	FALSE	no_overlap	NA	NA	NA	Other	NA	NA	NA
chr1	145424661	145424831	ENSG00000162825	NBPF20	FALSE	TRUE	low_confidence	chr5	107868369	107868666	Other	chr5	107868384	107868503
chr1	145424661	145424831	ENSG00000162825	NBPF20	FALSE	TRUE	low_confidence	chr5	107868849	107869090	Other	chr5	107868384	107868503
chr1	145465471	145465560	ENSG00000162825	NBPF20	FALSE	FALSE	no_overlap	NA	NA	NA	Other	NA	NA	NA
chr1	145465633	145465776	ENSG00000162825	NBPF20	FALSE	FALSE	no_overlap	NA	NA	NA	Other	NA	NA	NA
chr1	145644195	145644327	ENSG00000117262	GPR89A	FALSE	TRUE	high_confidence	chr3	96882216	96882319	Other	chr3	96882198	96882330
chr1	145644195	145644327	ENSG00000117262	GPR89A	FALSE	TRUE	high_confidence	chr3	96882073	96882422	Other	chr3	96882198	96882330
chr1	145644195	145644327	ENSG00000117262	GPR89A	FALSE	TRUE	high_confidence	chr3	96881545	96881851	Other	chr3	96882198	96882330
chr1	145675311	145675520	ENSG00000174827	PDZK1	TRUE	TRUE	no_overlap	NA	NA	NA	Other	NA	NA	NA
chr1	145690590	145690807	ENSG00000174827	PDZK1	TRUE	TRUE	low_confidence	chr3	96847745	96847959	Other	chr3	96847327	96847533
chr1	145690590	145690807	ENSG00000174827	PDZK1	TRUE	TRUE	low_confidence	chr3	96847026	96847135	Other	chr3	96847327	96847533
chr1	145716936	145717038	ENSG00000117281	CD160	TRUE	FALSE	no_overlap	NA	NA	NA	Other	NA	NA	NA
chr1	145719355	145719504	ENSG00000117281	CD160	TRUE	TRUE	no_overlap	NA	NA	NA	Other	chr3	96814522	96814653
chr1	145859023	145859128	ENSG00000131788	PIAS3	TRUE	TRUE	low_confidence	chr3	96697668	96697807	Other	chr3	96697035	96697139
chr1	145859023	145859128	ENSG00000131788	PIAS3	TRUE	TRUE	low_confidence	chr3	96697494	96697608	Other	chr3	96697035	96697139
chr1	145859023	145859128	ENSG00000131788	PIAS3	TRUE	TRUE	low_confidence	chr3	96697051	96697362	Other	chr3	96697035	96697139
chr1	145859023	145859128	ENSG00000131788	PIAS3	TRUE	TRUE	low_confidence	chr3	96696662	96696889	Other	chr3	96697035	96697139
chr1	145859023	145859128	ENSG00000131788	PIAS3	TRUE	TRUE	low_confidence	chr3	96696328	96696513	Other	chr3	96697035	96697139
chr1	145918681	145918950	ENSG00000131779	PEX11B	TRUE	TRUE	high_confidence	chr3	96635571	96635686	Other	chr3	96635444	96635695
chr1	145918681	145918950	ENSG00000131779	PEX11B	TRUE	TRUE	high_confidence	chr3	96635399	96635868	Other	chr3	96635444	96635695
chr1	145932632	145932738	ENSG00000280778	AC243547.3	FALSE	TRUE	no_overlap	NA	NA	NA	Other	NA	NA	NA
chr1	145932854	145932987	ENSG00000280778	AC243547.3	FALSE	TRUE	no_overlap	NA	NA	NA	Other	NA	NA	NA
chr1	145979415	145979666	ENSG00000121851	POLR3GL	FALSE	TRUE	low_confidence	chr3	96576837	96577106	Other	chr3	96576861	96577104
chr1	145980347	145980467	ENSG00000121851	POLR3GL	FALSE	TRUE	low_confidence	chr3	96576837	96577106	Other	chr3	96576355	96576465
chr1	145997274	145997471	ENSG00000265972	TXNIP	TRUE	TRUE	high_confidence	chr3	96557866	96558058	Conserved	chr3	96557098	96557254
chr1	145997274	145997471	ENSG00000265972	TXNIP	TRUE	TRUE	high_confidence	chr3	96557699	96558086	Conserved	chr3	96557098	96557254
chr1	145997274	145997471	ENSG00000265972	TXNIP	TRUE	TRUE	high_confidence	chr3	96557067	96557231	Conserved	chr3	96557098	96557254
chr1	146007323	146007425	ENSG00000168509	HJV	TRUE	TRUE	low_confidence	chr3	96551350	96551550	Other	chr3	96551443	96551551
chr1	146035593	146035766	ENSG00000168509	HJV	TRUE	FALSE	no_overlap	NA	NA	NA	Other	NA	NA	NA
chr1	146038020	146038136	ENSG00000168509	HJV	TRUE	FALSE	no_overlap	NA	NA	NA	Other	NA	NA	NA
chr1	146052059	146052239	ENSG00000271425	NBPF10	FALSE	FALSE	no_overlap	NA	NA	NA	Other	NA	NA	NA
chr1	146228944	146229248	ENSG00000264343	NOTCH2NLA	FALSE	TRUE	low_confidence	chr3	98013157	98013813	Other	chr3	98013325	98013571
chr1	146284901	146285037	ENSG00000264343	NOTCH2NLA	FALSE	TRUE	no_overlap	NA	NA	NA	Other	chr3	97956535	97956639
chr1	146307670	146307927	ENSG00000270339	AC243756.1	FALSE	TRUE	high_confidence	chr3	97932345	97932492	Other	chr3	97932228	97932462
chr1	146307670	146307927	ENSG00000270339	AC243756.1	FALSE	TRUE	high_confidence	chr3	97933364	97933509	Other	chr3	97932228	97932462
chr1	146307670	146307927	ENSG00000270339	AC243756.1	FALSE	TRUE	high_confidence	chr3	97932209	97932503	Other	chr3	97932228	97932462
chr1	146342615	146342902	ENSG00000270339	AC243756.1	FALSE	TRUE	high_confidence	chr13	117048443	117048669	Other	chr13	117048524	117048790
chr1	146342615	146342902	ENSG00000270339	AC243756.1	FALSE	TRUE	high_confidence	chr13	117048354	117048835	Other	chr13	117048524	117048790
chr1	146367468	146367656	ENSG00000270339	AC243756.1	FALSE	FALSE	no_overlap	NA	NA	NA	Other	NA	NA	NA
chr1	146370077	146370171	ENSG00000270339	AC243756.1	FALSE	FALSE	no_overlap	NA	NA	NA	Other	NA	NA	NA
chr1	146376756	146377218	ENSG00000270339	AC243756.1	FALSE	FALSE	no_overlap	NA	NA	NA	Other	NA	NA	NA
chr1	146387407	146387647	ENSG00000270339	AC243756.1	FALSE	FALSE	no_overlap	NA	NA	NA	Other	NA	NA	NA
chr1	146400285	146400397	ENSG00000270339	AC243756.1	FALSE	FALSE	no_overlap	NA	NA	NA	Other	NA	NA	NA
chr1	146412097	146412218	ENSG00000270339	AC243756.1	FALSE	FALSE	no_overlap	NA	NA	NA	Other	NA	NA	NA
chr1	146937608	146937810	ENSG00000268043	NBPF12	FALSE	TRUE	low_confidence	chr5	107868849	107869090	Other	chr5	107870244	107870431
chr1	146938256	146938347	ENSG00000268043	NBPF12	FALSE	TRUE	low_confidence	chr5	107868849	107869090	Other	chr5	107869364	107869598
chr1	146938256	146938347	ENSG00000268043	NBPF12	FALSE	TRUE	low_confidence	chr5	107868369	107868666	Other	chr5	107869364	107869598
chr1	147084630	147084796	ENSG00000131791	PRKAB2	TRUE	FALSE	no_overlap	NA	NA	NA	Other	NA	NA	NA
chr1	147172446	147172832	ENSG00000131791	PRKAB2	TRUE	TRUE	low_confidence	chr3	97657998	97658645	Other	chr3	97658053	97658352
chr1	147541027	147541102	ENSG00000116128	BCL9	TRUE	TRUE	low_confidence	chr3	97297741	97298129	Other	chr3	97298271	97298313
chr1	147541350	147541457	ENSG00000116128	BCL9	TRUE	TRUE	low_confidence	chr3	97297741	97298129	Other	chr3	97297972	97298079
chr1	147545088	147545420	ENSG00000116128	BCL9	TRUE	TRUE	low_confidence	chr3	97294381	97294651	Other	chr3	97294360	97294656
chr1	147600015	147600177	ENSG00000116128	BCL9	TRUE	TRUE	low_confidence	chr3	97227476	97227915	Other	chr3	97227371	97227534
chr1	147629331	147629517	ENSG00000116128	BCL9	TRUE	TRUE	no_overlap	NA	NA	NA	Other	chr3	97200486	97200576
chr1	147648391	147648555	ENSG00000162836	ACP6	TRUE	TRUE	no_overlap	NA	NA	NA	Other	chr3	97175484	97175648
chr1	147998162	147998390	ENSG00000188092	GPR89B	FALSE	TRUE	no_overlap	NA	NA	NA	Other	NA	NA	NA
chr1	148038556	148038960	ENSG00000188092	GPR89B	FALSE	FALSE	no_overlap	NA	NA	NA	Other	NA	NA	NA
chr1	148044789	148044892	ENSG00000188092	GPR89B	FALSE	FALSE	no_overlap	NA	NA	NA	Other	NA	NA	NA
chr1	148073496	148073588	ENSG00000263956	NBPF11	FALSE	FALSE	no_overlap	NA	NA	NA	Other	NA	NA	NA
chr1	148151137	148151234	ENSG00000263956	NBPF11	FALSE	TRUE	low_confidence	chr5	107868369	107868666	Other	chr5	107868412	107868502
chr1	148151137	148151234	ENSG00000263956	NBPF11	FALSE	TRUE	low_confidence	chr5	107868849	107869090	Other	chr5	107868412	107868502
chr1	148152265	148152383	ENSG00000263956	NBPF11	FALSE	TRUE	low_confidence	chr5	107868369	107868666	Other	chr5	107869332	107869593
chr1	148152265	148152383	ENSG00000263956	NBPF11	FALSE	TRUE	low_confidence	chr5	107868849	107869090	Other	chr5	107869332	107869593
chr1	148152806	148153031	ENSG00000263956	NBPF11	FALSE	TRUE	low_confidence	chr5	107868849	107869090	Other	chr5	107870211	107870416
chr1	148318630	148318854	ENSG00000236334	PPIAL4G	FALSE	FALSE	no_overlap	NA	NA	NA	Other	NA	NA	NA
chr1	148334690	148334808	ENSG00000236334	PPIAL4G	FALSE	FALSE	no_overlap	NA	NA	NA	Other	NA	NA	NA
chr1	148363535	148363645	ENSG00000236334	PPIAL4G	FALSE	FALSE	no_overlap	NA	NA	NA	Other	NA	NA	NA
chr1	148372777	148372941	ENSG00000236334	PPIAL4G	FALSE	FALSE	no_overlap	NA	NA	NA	Other	NA	NA	NA
chr1	148458506	148458709	ENSG00000236334	PPIAL4G	FALSE	TRUE	high_confidence	chr13	117024101	117024262	Other	chr13	117024038	117024244
chr1	148458506	148458709	ENSG00000236334	PPIAL4G	FALSE	TRUE	high_confidence	chr13	117024052	117024774	Other	chr13	117024038	117024244
chr1	148458506	148458709	ENSG00000236334	PPIAL4G	FALSE	TRUE	high_confidence	chr13	117025109	117025236	Other	chr13	117024038	117024244
chr1	148458926	148459016	ENSG00000236334	PPIAL4G	FALSE	TRUE	high_confidence	chr13	117024101	117024262	Other	chr13	117024456	117024563
chr1	148458926	148459016	ENSG00000236334	PPIAL4G	FALSE	TRUE	high_confidence	chr13	117024052	117024774	Other	chr13	117024456	117024563
chr1	148458926	148459016	ENSG00000236334	PPIAL4G	FALSE	TRUE	high_confidence	chr13	117025109	117025236	Other	chr13	117024456	117024563
chr1	148458926	148459016	ENSG00000236334	PPIAL4G	FALSE	TRUE	high_confidence	chr13	117025372	117025527	Other	chr13	117024456	117024563
chr1	148459461	148459570	ENSG00000236334	PPIAL4G	FALSE	TRUE	high_confidence	chr13	117024101	117024262	Other	chr13	117025021	117025139
chr1	148459461	148459570	ENSG00000236334	PPIAL4G	FALSE	TRUE	high_confidence	chr13	117024052	117024774	Other	chr13	117025021	117025139
chr1	148459461	148459570	ENSG00000236334	PPIAL4G	FALSE	TRUE	high_confidence	chr13	117025109	117025236	Other	chr13	117025021	117025139
chr1	148459461	148459570	ENSG00000236334	PPIAL4G	FALSE	TRUE	high_confidence	chr13	117025372	117025527	Other	chr13	117025021	117025139
chr1	148481144	148481449	ENSG00000236334	PPIAL4G	FALSE	TRUE	high_confidence	chr13	117048443	117048669	Other	chr13	117048511	117048794
chr1	148481144	148481449	ENSG00000236334	PPIAL4G	FALSE	TRUE	high_confidence	chr13	117048354	117048835	Other	chr13	117048511	117048794
chr1	148514464	148514588	ENSG00000270629	NBPF14	FALSE	TRUE	no_overlap	NA	NA	NA	Other	chr13	117083314	117083431
chr1	148522552	148522972	ENSG00000270629	NBPF14	FALSE	FALSE	no_overlap	NA	NA	NA	Other	NA	NA	NA
chr1	148523830	148523998	ENSG00000270629	NBPF14	FALSE	FALSE	no_overlap	NA	NA	NA	Other	NA	NA	NA
chr1	148526636	148526814	ENSG00000270629	NBPF14	FALSE	FALSE	no_overlap	NA	NA	NA	Other	NA	NA	NA
chr1	148529184	148529345	ENSG00000270629	NBPF14	FALSE	FALSE	no_overlap	NA	NA	NA	Other	NA	NA	NA
chr1	148679699	148679976	ENSG00000270629	NBPF14	FALSE	TRUE	low_confidence	chr3	98013157	98013813	Other	chr3	98013345	98013574
chr1	148744501	148744623	ENSG00000177144	NUDT4B	FALSE	TRUE	low_confidence	chr3	97942731	97942892	Other	chr3	97942307	97942421
chr1	148757616	148757726	ENSG00000177144	NUDT4B	FALSE	TRUE	high_confidence	chr3	97932345	97932492	Other	chr3	97933312	97933424
chr1	148757616	148757726	ENSG00000177144	NUDT4B	FALSE	TRUE	high_confidence	chr3	97933364	97933509	Other	chr3	97933312	97933424
chr1	148757616	148757726	ENSG00000177144	NUDT4B	FALSE	TRUE	high_confidence	chr3	97932209	97932503	Other	chr3	97933312	97933424
chr1	148758475	148758718	ENSG00000177144	NUDT4B	FALSE	TRUE	high_confidence	chr3	97932345	97932492	Other	chr3	97932223	97932447
chr1	148758475	148758718	ENSG00000177144	NUDT4B	FALSE	TRUE	high_confidence	chr3	97933364	97933509	Other	chr3	97932223	97932447
chr1	148758475	148758718	ENSG00000177144	NUDT4B	FALSE	TRUE	high_confidence	chr3	97932209	97932503	Other	chr3	97932223	97932447
chr1	148948786	148949003	ENSG00000178104	PDE4DIP	TRUE	TRUE	no_overlap	NA	NA	NA	Other	chr3	97770580	97771802
chr1	149102646	149102839	ENSG00000269713	NBPF9	FALSE	TRUE	low_confidence	chr5	107868369	107868666	Other	chr5	107868408	107868552
chr1	149102646	149102839	ENSG00000269713	NBPF9	FALSE	TRUE	low_confidence	chr5	107868849	107869090	Other	chr5	107868408	107868552
chr1	149160679	149160769	ENSG00000269713	NBPF9	FALSE	FALSE	no_overlap	NA	NA	NA	Other	NA	NA	NA
chr1	149177172	149177340	ENSG00000269713	NBPF9	FALSE	TRUE	high_confidence	chr13	117024101	117024262	Other	chr13	117024045	117024215
chr1	149177172	149177340	ENSG00000269713	NBPF9	FALSE	TRUE	high_confidence	chr13	117025109	117025236	Other	chr13	117024045	117024215
chr1	149177172	149177340	ENSG00000269713	NBPF9	FALSE	TRUE	high_confidence	chr13	117024052	117024774	Other	chr13	117024045	117024215
chr1	149390453	149390683	ENSG00000271383	NBPF19	FALSE	TRUE	low_confidence	chr3	98013157	98013813	Other	chr3	98013393	98013575
chr1	149560919	149561169	ENSG00000271383	NBPF19	FALSE	FALSE	no_overlap	NA	NA	NA	Other	NA	NA	NA
chr1	149585707	149586002	ENSG00000263464	PPIAL4C	FALSE	TRUE	high_confidence	chr13	117048443	117048669	Other	chr13	117048520	117048793
chr1	149585707	149586002	ENSG00000263464	PPIAL4C	FALSE	TRUE	high_confidence	chr13	117048354	117048835	Other	chr13	117048520	117048793
chr1	149608415	149608629	ENSG00000263464	PPIAL4C	FALSE	TRUE	high_confidence	chr13	117024101	117024262	Other	chr13	117024060	117024272
chr1	149608415	149608629	ENSG00000263464	PPIAL4C	FALSE	TRUE	high_confidence	chr13	117025109	117025236	Other	chr13	117024060	117024272
chr1	149608415	149608629	ENSG00000263464	PPIAL4C	FALSE	TRUE	high_confidence	chr13	117024052	117024774	Other	chr13	117024060	117024272
chr1	149633766	149633858	ENSG00000263464	PPIAL4C	FALSE	FALSE	no_overlap	NA	NA	NA	Other	NA	NA	NA
chr1	149636529	149636622	ENSG00000263464	PPIAL4C	FALSE	FALSE	no_overlap	NA	NA	NA	Other	NA	NA	NA
chr1	149693019	149693130	ENSG00000203814	HIST2H2BF	TRUE	TRUE	no_overlap	NA	NA	NA	Other	chr9	48450487	48450585
chr1	149812173	149812336	ENSG00000203814	HIST2H2BF	TRUE	TRUE	low_confidence	chr3	96269480	96269892	Other	chr3	96269737	96269902
chr1	149812173	149812336	ENSG00000203814	HIST2H2BF	TRUE	TRUE	low_confidence	chr3	96268680	96269185	Other	chr3	96269737	96269902
chr1	149832506	149832961	ENSG00000270882	HIST2H4A	TRUE	TRUE	low_confidence	chr3	96263676	96263885	Other	chr3	96263028	96263487
chr1	149832506	149832961	ENSG00000270882	HIST2H4A	TRUE	TRUE	low_confidence	chr3	96263022	96263521	Other	chr3	96263028	96263487
chr1	149841080	149841194	ENSG00000203811	HIST2H3C	FALSE	TRUE	low_confidence	chr3	96246703	96247175	Other	chr3	96246850	96246963
chr1	149841080	149841194	ENSG00000203811	HIST2H3C	FALSE	TRUE	low_confidence	chr3	96246193	96246403	Other	chr3	96246850	96246963
chr1	149842593	149842780	ENSG00000203812	HIST2H2AA3	FALSE	TRUE	low_confidence	chr3	96246193	96246403	Other	chr3	96245509	96245686
chr1	149842593	149842780	ENSG00000203812	HIST2H2AA3	FALSE	TRUE	low_confidence	chr3	96245192	96245944	Other	chr3	96245509	96245686
chr1	149842593	149842780	ENSG00000203812	HIST2H2AA3	FALSE	TRUE	low_confidence	chr13	23571254	23571735	Other	chr3	96245509	96245686
chr1	149842593	149842780	ENSG00000203812	HIST2H2AA3	FALSE	TRUE	low_confidence	chr3	96240083	96240531	Other	chr3	96245509	96245686
chr1	149851041	149851251	ENSG00000272196	HIST2H2AA4	FALSE	TRUE	low_confidence	chr3	96240083	96240531	Other	chr3	96240113	96240313
chr1	149851041	149851251	ENSG00000272196	HIST2H2AA4	FALSE	TRUE	low_confidence	chr3	96239200	96239634	Other	chr3	96240113	96240313
chr1	149851041	149851251	ENSG00000272196	HIST2H2AA4	FALSE	TRUE	low_confidence	chr13	23573885	23574790	Other	chr3	96240113	96240313
chr1	149852598	149852715	ENSG00000203852	HIST2H3A	TRUE	TRUE	low_confidence	chr3	96239200	96239634	Other	chr3	96238881	96238992
chr1	149852598	149852715	ENSG00000203852	HIST2H3A	TRUE	TRUE	low_confidence	chr3	96238663	96239105	Other	chr3	96238881	96238992
chr1	149860804	149860897	ENSG00000270276	HIST2H4B	FALSE	TRUE	low_confidence	chr3	96263022	96263521	Other	chr3	96262975	96263070
chr1	149860804	149860897	ENSG00000270276	HIST2H4B	FALSE	TRUE	low_confidence	chr3	96263676	96263885	Other	chr3	96262975	96263070
chr1	149860986	149861281	ENSG00000270276	HIST2H4B	FALSE	TRUE	low_confidence	chr3	96263022	96263521	Other	chr3	96263159	96263458
chr1	149860986	149861281	ENSG00000270276	HIST2H4B	FALSE	TRUE	low_confidence	chr3	96263676	96263885	Other	chr3	96263159	96263458
chr1	149886540	149886675	ENSG00000184678	HIST2H2BE	FALSE	TRUE	low_confidence	chr3	96221308	96221612	Other	chr3	96221126	96221266
chr1	149886540	149886675	ENSG00000184678	HIST2H2BE	FALSE	TRUE	low_confidence	chr3	96220538	96220963	Other	chr3	96221126	96221266
chr1	149886540	149886675	ENSG00000184678	HIST2H2BE	FALSE	TRUE	low_confidence	chr3	96219892	96220159	Other	chr3	96221126	96221266
chr1	149886935	149887060	ENSG00000184260	HIST2H2AC	FALSE	TRUE	low_confidence	chr3	96221308	96221612	Other	chr3	96220759	96220884
chr1	149886935	149887060	ENSG00000184260	HIST2H2AC	FALSE	TRUE	low_confidence	chr3	96220538	96220963	Other	chr3	96220759	96220884
chr1	149886935	149887060	ENSG00000184260	HIST2H2AC	FALSE	TRUE	low_confidence	chr3	96219892	96220159	Other	chr3	96220759	96220884
chr1	149899509	149899625	ENSG00000178096	BOLA1	TRUE	TRUE	low_confidence	chr3	96197088	96197739	Other	chr3	96197605	96197698
chr1	150010705	150010891	ENSG00000264522	OTUD7B	TRUE	TRUE	low_confidence	chr3	96105231	96105541	Other	chr3	96104345	96104564
chr1	150010705	150010891	ENSG00000264522	OTUD7B	TRUE	TRUE	low_confidence	chr3	96104436	96104779	Other	chr3	96104345	96104564
chr1	150151381	150151519	ENSG00000023902	PLEKHO1	TRUE	TRUE	low_confidence	chr3	95995773	95996077	Other	chr3	95995112	95995264
chr1	150234635	150234813	ENSG00000143401	ANP32E	TRUE	TRUE	low_confidence	chr3	95929821	95930034	Other	chr3	95930392	95930513
chr1	150235997	150236128	ENSG00000143401	ANP32E	TRUE	TRUE	low_confidence	chr3	95929821	95930034	Other	chr3	95929275	95929412
chr1	150235997	150236128	ENSG00000143401	ANP32E	TRUE	TRUE	low_confidence	chr3	95928976	95929441	Other	chr3	95929275	95929412
chr1	150321451	150321552	ENSG00000117360	PRPF3	TRUE	TRUE	low_confidence	chr3	95855605	95856123	Other	chr3	95855789	95855889
chr1	150487201	150487332	ENSG00000143374	TARS2	TRUE	TRUE	low_confidence	chr3	95754799	95755120	Other	chr3	95754950	95755064
chr1	150562106	150562277	ENSG00000143382	ADAMTSL4	TRUE	TRUE	high_confidence	chr3	95674330	95674471	Conserved	chr3	95674315	95674481
chr1	150562106	150562277	ENSG00000143382	ADAMTSL4	TRUE	TRUE	high_confidence	chr3	95674256	95674526	Conserved	chr3	95674315	95674481
chr1	150562106	150562277	ENSG00000143382	ADAMTSL4	TRUE	TRUE	high_confidence	chr3	95672867	95673392	Conserved	chr3	95674315	95674481
chr1	150562802	150563035	ENSG00000143382	ADAMTSL4	TRUE	TRUE	high_confidence	chr3	95674330	95674471	Conserved	chr3	95673523	95673823
chr1	150562802	150563035	ENSG00000143382	ADAMTSL4	TRUE	TRUE	high_confidence	chr3	95673049	95673225	Conserved	chr3	95673523	95673823
chr1	150562802	150563035	ENSG00000143382	ADAMTSL4	TRUE	TRUE	high_confidence	chr3	95674256	95674526	Conserved	chr3	95673523	95673823
chr1	150562802	150563035	ENSG00000143382	ADAMTSL4	TRUE	TRUE	high_confidence	chr3	95672867	95673392	Conserved	chr3	95673523	95673823
chr1	150563448	150563616	ENSG00000143382	ADAMTSL4	TRUE	TRUE	high_confidence	chr3	95673049	95673225	Conserved	chr3	95673006	95673132
chr1	150563448	150563616	ENSG00000143382	ADAMTSL4	TRUE	TRUE	high_confidence	chr3	95672867	95673392	Conserved	chr3	95673006	95673132
chr1	150567399	150567627	ENSG00000143382	ADAMTSL4	TRUE	TRUE	high_confidence	chr3	95669107	95669286	Conserved	chr3	95668953	95669376
chr1	150567399	150567627	ENSG00000143382	ADAMTSL4	TRUE	TRUE	high_confidence	chr3	95669083	95669307	Conserved	chr3	95668953	95669376
chr1	150579498	150579683	ENSG00000143384	MCL1	TRUE	TRUE	high_confidence	chr3	95659547	95659674	Conserved	chr3	95658731	95658889
chr1	150579498	150579683	ENSG00000143384	MCL1	TRUE	TRUE	high_confidence	chr3	95658576	95658755	Conserved	chr3	95658731	95658889
chr1	150579498	150579683	ENSG00000143384	MCL1	TRUE	TRUE	high_confidence	chr3	95659397	95659729	Conserved	chr3	95658731	95658889
chr1	150579498	150579683	ENSG00000143384	MCL1	TRUE	TRUE	high_confidence	chr3	95658515	95658933	Conserved	chr3	95658731	95658889
chr1	150684069	150684208	ENSG00000143457	GOLPH3L	TRUE	FALSE	no_overlap	NA	NA	NA	Other	NA	NA	NA
chr1	150697333	150697437	ENSG00000143457	GOLPH3L	TRUE	TRUE	low_confidence	chr3	95588585	95589122	Other	chr3	95588692	95588792
chr1	150926335	150926458	ENSG00000143379	SETDB1	TRUE	TRUE	low_confidence	chr3	95357096	95357400	Other	chr3	95357143	95357267
chr1	150926335	150926458	ENSG00000143379	SETDB1	TRUE	TRUE	low_confidence	chr3	95356768	95357036	Other	chr3	95357143	95357267
chr1	150977422	150977534	ENSG00000143418	CERS2	TRUE	TRUE	high_confidence	chr3	95312706	95312813	Conserved	chr3	95312730	95312845
chr1	150977422	150977534	ENSG00000143418	CERS2	TRUE	TRUE	high_confidence	chr3	95312670	95312875	Conserved	chr3	95312730	95312845
chr1	151057728	151057952	ENSG00000213190	MLLT11	TRUE	TRUE	low_confidence	chr3	95230011	95230194	Other	chr3	95230389	95230590
chr1	151057728	151057952	ENSG00000213190	MLLT11	TRUE	TRUE	low_confidence	chr3	95229555	95229798	Other	chr3	95230389	95230590
chr1	151059342	151059441	ENSG00000213190	MLLT11	TRUE	TRUE	low_confidence	chr3	95229555	95229798	Other	chr3	95228873	95228951
chr1	151059342	151059441	ENSG00000213190	MLLT11	TRUE	TRUE	low_confidence	chr3	95228616	95229037	Other	chr3	95228873	95228951
chr1	151059342	151059441	ENSG00000213190	MLLT11	TRUE	TRUE	low_confidence	chr3	95228113	95228471	Other	chr3	95228873	95228951
chr1	151059597	151059690	ENSG00000213190	MLLT11	TRUE	TRUE	low_confidence	chr3	95229555	95229798	Other	chr3	95228686	95228778
chr1	151059597	151059690	ENSG00000213190	MLLT11	TRUE	TRUE	low_confidence	chr3	95228616	95229037	Other	chr3	95228686	95228778
chr1	151059597	151059690	ENSG00000213190	MLLT11	TRUE	TRUE	low_confidence	chr3	95228113	95228471	Other	chr3	95228686	95228778
chr1	151070445	151070565	ENSG00000143458	GABPB2	TRUE	TRUE	low_confidence	chr3	95217765	95218133	Other	chr3	95217950	95218064
chr1	151070445	151070565	ENSG00000143458	GABPB2	TRUE	TRUE	low_confidence	chr3	95217253	95217432	Other	chr3	95217950	95218064
chr1	151070662	151070724	ENSG00000143458	GABPB2	TRUE	TRUE	low_confidence	chr3	95217765	95218133	Other	chr3	95217795	95217854
chr1	151070662	151070724	ENSG00000143458	GABPB2	TRUE	TRUE	low_confidence	chr3	95217253	95217432	Other	chr3	95217795	95217854
chr1	151071100	151071243	ENSG00000143458	GABPB2	TRUE	TRUE	low_confidence	chr3	95217765	95218133	Other	chr3	95217298	95217436
chr1	151071100	151071243	ENSG00000143458	GABPB2	TRUE	TRUE	low_confidence	chr3	95217253	95217432	Other	chr3	95217298	95217436
chr1	151157299	151157493	ENSG00000163154	TNFAIP8L2	TRUE	TRUE	high_confidence	chr3	95141601	95141748	Conserved	chr3	95141543	95141732
chr1	151157299	151157493	ENSG00000163154	TNFAIP8L2	TRUE	TRUE	high_confidence	chr3	95142664	95142906	Conserved	chr3	95141543	95141732
chr1	151157299	151157493	ENSG00000163154	TNFAIP8L2	TRUE	TRUE	high_confidence	chr3	95141576	95141794	Conserved	chr3	95141543	95141732
chr1	151165910	151166161	ENSG00000163155	LYSMD1	TRUE	TRUE	low_confidence	chr3	95133877	95134116	Other	chr3	95133887	95134126
chr1	151190116	151190295	ENSG00000163159	VPS72	TRUE	TRUE	high_confidence	chr3	95110930	95111069	Conserved	chr3	95110923	95111103
chr1	151190116	151190295	ENSG00000163159	VPS72	TRUE	TRUE	high_confidence	chr3	95111287	95111500	Conserved	chr3	95110923	95111103
chr1	151190116	151190295	ENSG00000163159	VPS72	TRUE	TRUE	high_confidence	chr3	95110870	95111152	Conserved	chr3	95110923	95111103
chr1	151254616	151254690	ENSG00000159352	PSMD4	TRUE	TRUE	high_confidence	chr3	95042535	95042744	Conserved	chr3	95042623	95042687
chr1	151254616	151254690	ENSG00000159352	PSMD4	TRUE	TRUE	high_confidence	chr3	95042455	95042810	Conserved	chr3	95042623	95042687
chr1	151281408	151281526	ENSG00000143373	ZNF687	TRUE	TRUE	low_confidence	chr3	95015384	95016532	Other	chr3	95016208	95016325
chr1	151437187	151437264	ENSG00000143442	POGZ	TRUE	FALSE	no_overlap	NA	NA	NA	Other	NA	NA	NA
chr1	151511349	151511435	ENSG00000143375	CGN	TRUE	TRUE	low_confidence	chr3	94786796	94786920	Other	chr3	94786437	94786520
chr1	151511349	151511435	ENSG00000143375	CGN	TRUE	TRUE	low_confidence	chr3	94786396	94786625	Other	chr3	94786437	94786520
chr1	151611922	151612000	ENSG00000143376	SNX27	TRUE	TRUE	low_confidence	chr3	94582501	94582876	Other	chr3	94582742	94582780
chr1	151611922	151612000	ENSG00000143376	SNX27	TRUE	TRUE	low_confidence	chr3	94582107	94582361	Other	chr3	94582742	94582780
chr1	151763436	151763611	ENSG00000143450	OAZ3	TRUE	TRUE	low_confidence	chr3	94443738	94443847	Other	chr3	94443146	94443391
chr1	151763436	151763611	ENSG00000143450	OAZ3	TRUE	TRUE	low_confidence	chr3	94443099	94443495	Other	chr3	94443146	94443391
chr1	151790377	151790691	ENSG00000182134	TDRKH	TRUE	TRUE	low_confidence	chr3	94413088	94413493	Other	chr3	94413087	94413389
chr1	151790377	151790691	ENSG00000182134	TDRKH	TRUE	TRUE	low_confidence	chr3	94412872	94413002	Other	chr3	94413087	94413389
chr1	151815788	151816135	ENSG00000143365	RORC	TRUE	TRUE	no_overlap	NA	NA	NA	Conserved	chr3	94388060	94388409
chr1	151828534	151828785	ENSG00000143365	RORC	TRUE	TRUE	high_confidence	chr3	94375989	94376165	Conserved	chr3	94375385	94375582
chr1	151828534	151828785	ENSG00000143365	RORC	TRUE	TRUE	high_confidence	chr3	94375355	94375609	Conserved	chr3	94375385	94375582
chr1	151828534	151828785	ENSG00000143365	RORC	TRUE	TRUE	high_confidence	chr3	94375963	94376195	Conserved	chr3	94375385	94375582
chr1	151828534	151828785	ENSG00000143365	RORC	TRUE	TRUE	high_confidence	chr3	94375333	94375679	Conserved	chr3	94375385	94375582
chr1	151829225	151829370	ENSG00000143365	RORC	TRUE	TRUE	high_confidence	chr3	94375355	94375609	Conserved	chr3	94375121	94375208
chr1	151829225	151829370	ENSG00000143365	RORC	TRUE	TRUE	high_confidence	chr3	94375333	94375679	Conserved	chr3	94375121	94375208
chr1	151839789	151839974	ENSG00000225556	C2CD4D	TRUE	TRUE	no_overlap	NA	NA	NA	Other	chr3	94362258	94362447
chr1	151898781	151898912	ENSG00000159445	THEM4	TRUE	FALSE	no_overlap	NA	NA	NA	Other	NA	NA	NA
chr1	151909444	151909687	ENSG00000159445	THEM4	TRUE	TRUE	low_confidence	chr3	94309858	94310309	Other	chr3	94310077	94310231
chr1	151972982	151973157	ENSG00000197747	S100A10	TRUE	TRUE	low_confidence	chr3	93581693	93581926	Conserved	chr3	93582556	93582731
chr1	151984372	151984467	ENSG00000197747	S100A10	TRUE	TRUE	high_confidence	chr3	93562506	93562625	Conserved	chr3	93562545	93562623
chr1	151984372	151984467	ENSG00000197747	S100A10	TRUE	TRUE	high_confidence	chr3	93562405	93562739	Conserved	chr3	93562545	93562623
chr1	152036948	152037090	ENSG00000163191	S100A11	TRUE	TRUE	no_overlap	NA	NA	NA	Conserved	chr3	93520414	93520519
chr1	152048167	152048365	ENSG00000163191	S100A11	TRUE	TRUE	high_confidence	chr3	93506456	93506592	Conserved	chr3	93506375	93506588
chr1	152048167	152048365	ENSG00000163191	S100A11	TRUE	TRUE	high_confidence	chr3	93506142	93506264	Conserved	chr3	93506375	93506588
chr1	152048167	152048365	ENSG00000163191	S100A11	TRUE	TRUE	high_confidence	chr3	93506068	93506648	Conserved	chr3	93506375	93506588
chr1	152112059	152112211	ENSG00000159450	TCHH	TRUE	TRUE	low_confidence	chr3	93444048	93444410	Other	chr3	93443939	93444109
chr1	153533249	153533382	ENSG00000197956	S100A6	TRUE	TRUE	low_confidence	chr3	90615505	90615672	Conserved	chr3	90615554	90615730
chr1	153535348	153535462	ENSG00000197956	S100A6	TRUE	TRUE	high_confidence	chr3	90612743	90612904	Conserved	chr3	90613669	90613758
chr1	153535348	153535462	ENSG00000197956	S100A6	TRUE	TRUE	high_confidence	chr3	90612677	90612970	Conserved	chr3	90613669	90613758
chr1	153536140	153536286	ENSG00000197956	S100A6	TRUE	TRUE	high_confidence	chr3	90612743	90612904	Conserved	chr3	90612866	90613054
chr1	153536140	153536286	ENSG00000197956	S100A6	TRUE	TRUE	high_confidence	chr3	90612677	90612970	Conserved	chr3	90612866	90613054
chr1	153536321	153536513	ENSG00000197956	S100A6	TRUE	TRUE	high_confidence	chr3	90612743	90612904	Conserved	chr3	90612387	90612484
chr1	153536321	153536513	ENSG00000197956	S100A6	TRUE	TRUE	high_confidence	chr3	90612677	90612970	Conserved	chr3	90612387	90612484
chr1	153540932	153541022	ENSG00000196420	S100A5	TRUE	TRUE	no_overlap	NA	NA	NA	Other	chr3	90609016	90609103
chr1	153545834	153545977	ENSG00000196154	S100A4	TRUE	TRUE	high_confidence	chr3	90604574	90604731	Conserved	chr3	90603597	90603742
chr1	153545834	153545977	ENSG00000196154	S100A4	TRUE	TRUE	high_confidence	chr3	90604545	90604777	Conserved	chr3	90603597	90603742
chr1	153566587	153566795	ENSG00000196754	S100A2	TRUE	TRUE	high_confidence	chr3	90587737	90587940	Other	chr3	90587019	90587188
chr1	153566587	153566795	ENSG00000196754	S100A2	TRUE	TRUE	high_confidence	chr3	90586896	90587189	Other	chr3	90587019	90587188
chr1	153566587	153566795	ENSG00000196754	S100A2	TRUE	TRUE	high_confidence	chr3	90587708	90587998	Other	chr3	90587019	90587188
chr1	153566587	153566795	ENSG00000196754	S100A2	TRUE	TRUE	high_confidence	chr3	90586886	90587232	Other	chr3	90587019	90587188
chr1	153775477	153775757	ENSG00000143554	SLC27A3	TRUE	TRUE	no_overlap	NA	NA	NA	Other	chr3	90389531	90389807
chr1	153783471	153783565	ENSG00000143554	SLC27A3	TRUE	TRUE	no_overlap	NA	NA	NA	Other	NA	NA	NA
chr1	153920413	153920684	ENSG00000143614	GATAD2B	TRUE	TRUE	no_overlap	NA	NA	NA	Other	chr3	90295728	90295989
chr1	153945231	153945434	ENSG00000198837	DENND4B	TRUE	TRUE	high_confidence	chr3	90265693	90265902	Conserved	chr3	90266363	90266572
chr1	153945231	153945434	ENSG00000198837	DENND4B	TRUE	TRUE	high_confidence	chr3	90266463	90266629	Conserved	chr3	90266363	90266572
chr1	153945231	153945434	ENSG00000198837	DENND4B	TRUE	TRUE	high_confidence	chr3	90265639	90265995	Conserved	chr3	90266363	90266572
chr1	153946672	153946821	ENSG00000198837	DENND4B	TRUE	TRUE	high_confidence	chr3	90265693	90265902	Conserved	chr3	90265037	90265186
chr1	153946672	153946821	ENSG00000198837	DENND4B	TRUE	TRUE	high_confidence	chr3	90265639	90265995	Conserved	chr3	90265037	90265186
chr1	153946672	153946821	ENSG00000198837	DENND4B	TRUE	TRUE	high_confidence	chr3	90264932	90265200	Conserved	chr3	90265037	90265186
chr1	153958654	153958763	ENSG00000160741	CRTC2	TRUE	TRUE	low_confidence	chr3	90254898	90255176	Other	chr3	90254138	90254246
chr1	153958654	153958763	ENSG00000160741	CRTC2	TRUE	TRUE	low_confidence	chr3	90254562	90254683	Other	chr3	90254138	90254246
chr1	153958654	153958763	ENSG00000160741	CRTC2	TRUE	TRUE	low_confidence	chr3	90254054	90254382	Other	chr3	90254138	90254246
chr1	153977631	153977762	ENSG00000285641	AL358472.6	FALSE	TRUE	low_confidence	chr3	90231306	90231806	Other	chr3	90231508	90231649
chr1	153977631	153977762	ENSG00000285641	AL358472.6	FALSE	TRUE	low_confidence	chr3	90231119	90231251	Other	chr3	90231508	90231649
chr1	153990615	153990849	ENSG00000177954	RPS27	FALSE	TRUE	low_confidence	chr3	90213403	90213835	Other	chr3	90213563	90213795
chr1	154157817	154158064	ENSG00000143549	TPM3	TRUE	TRUE	no_overlap	NA	NA	NA	Conserved	chr3	90099238	90099456
chr1	154182332	154182483	ENSG00000143549	TPM3	TRUE	TRUE	high_confidence	chr3	90080135	90080477	Conserved	chr3	90080329	90080484
chr1	154182332	154182483	ENSG00000143549	TPM3	TRUE	TRUE	high_confidence	chr3	90079516	90079638	Conserved	chr3	90080329	90080484
chr1	154182332	154182483	ENSG00000143549	TPM3	TRUE	TRUE	high_confidence	chr3	90080099	90080547	Conserved	chr3	90080329	90080484
chr1	154182332	154182483	ENSG00000143549	TPM3	TRUE	TRUE	high_confidence	chr3	90079448	90079754	Conserved	chr3	90080329	90080484
chr1	154183163	154183266	ENSG00000143549	TPM3	TRUE	TRUE	high_confidence	chr3	90080135	90080477	Conserved	chr3	90079584	90079689
chr1	154183163	154183266	ENSG00000143549	TPM3	TRUE	TRUE	high_confidence	chr3	90079516	90079638	Conserved	chr3	90079584	90079689
chr1	154183163	154183266	ENSG00000143549	TPM3	TRUE	TRUE	high_confidence	chr3	90080099	90080547	Conserved	chr3	90079584	90079689
chr1	154183163	154183266	ENSG00000143549	TPM3	TRUE	TRUE	high_confidence	chr3	90079448	90079754	Conserved	chr3	90079584	90079689
chr1	154220706	154221022	ENSG00000143569	UBAP2L	TRUE	TRUE	low_confidence	chr3	90052311	90052816	Other	chr3	90052408	90052729
chr1	154220706	154221022	ENSG00000143569	UBAP2L	TRUE	TRUE	low_confidence	chr3	90051681	90052050	Other	chr3	90052408	90052729
chr1	154272584	154272682	ENSG00000143575	HAX1	TRUE	TRUE	low_confidence	chr3	89999039	89999164	Other	chr3	89998626	89998721
chr1	154272584	154272682	ENSG00000143575	HAX1	TRUE	TRUE	low_confidence	chr3	89998593	89998936	Other	chr3	89998626	89998721
chr1	154272584	154272682	ENSG00000143575	HAX1	TRUE	TRUE	low_confidence	chr3	89997874	89998006	Other	chr3	89998626	89998721
chr1	154328742	154328771	ENSG00000143515	ATP8B2	TRUE	TRUE	low_confidence	chr3	89960597	89960820	Other	chr3	89960577	89960595
chr1	154328742	154328771	ENSG00000143515	ATP8B2	TRUE	TRUE	low_confidence	chr3	89959649	89959758	Other	chr3	89960577	89960595
chr1	154335083	154335256	ENSG00000143515	ATP8B2	TRUE	TRUE	low_confidence	chr3	89953517	89953726	Other	chr3	89953600	89953750
chr1	154342980	154343197	ENSG00000143515	ATP8B2	TRUE	TRUE	no_overlap	NA	NA	NA	Other	chr3	89948151	89948368
chr1	154403131	154403352	ENSG00000160712	IL6R	TRUE	TRUE	no_overlap	NA	NA	NA	Conserved	chr3	89915071	89915097
chr1	154403512	154403757	ENSG00000160712	IL6R	TRUE	TRUE	no_overlap	NA	NA	NA	Conserved	chr3	89914709	89914898
chr1	154431788	154431892	ENSG00000160712	IL6R	TRUE	TRUE	no_overlap	NA	NA	NA	Conserved	NA	NA	NA
chr1	154445133	154445370	ENSG00000160712	IL6R	TRUE	FALSE	no_overlap	NA	NA	NA	Conserved	NA	NA	NA
chr1	154463731	154463982	ENSG00000160712	IL6R	TRUE	TRUE	high_confidence	chr3	89872274	89872535	Conserved	chr3	89872283	89872522
chr1	154463731	154463982	ENSG00000160712	IL6R	TRUE	TRUE	high_confidence	chr3	89872221	89872587	Conserved	chr3	89872283	89872522
chr1	154558622	154559056	ENSG00000160714	UBE2Q1	TRUE	TRUE	low_confidence	chr3	89774239	89774372	Other	chr3	89773227	89773650
chr1	154558622	154559056	ENSG00000160714	UBE2Q1	TRUE	TRUE	low_confidence	chr3	89773126	89773503	Other	chr3	89773227	89773650
chr1	154558622	154559056	ENSG00000160714	UBE2Q1	TRUE	TRUE	low_confidence	chr3	89772486	89772957	Other	chr3	89773227	89773650
chr1	154567964	154568043	ENSG00000160716	CHRNB2	TRUE	TRUE	low_confidence	chr3	89764429	89764587	Other	chr3	89764408	89764464
chr1	154608197	154608358	ENSG00000160710	ADAR	TRUE	TRUE	low_confidence	chr3	89730602	89730798	Other	chr3	89730703	89730752
chr1	154745271	154745523	ENSG00000143603	KCNN3	TRUE	TRUE	no_overlap	NA	NA	NA	Alternate	chr3	89632088	89632131
chr1	154748076	154748327	ENSG00000143603	KCNN3	TRUE	TRUE	no_overlap	NA	NA	NA	Alternate	chr3	89629642	89629830
chr1	154759312	154759582	ENSG00000143603	KCNN3	TRUE	TRUE	no_overlap	NA	NA	NA	Alternate	chr3	89622728	89622926
chr1	154760539	154760642	ENSG00000143603	KCNN3	TRUE	TRUE	no_overlap	NA	NA	NA	Alternate	chr3	89621992	89622058
chr1	154791330	154791579	ENSG00000143603	KCNN3	TRUE	TRUE	no_overlap	NA	NA	NA	Alternate	chr3	89592933	89593156
chr1	154936535	154936773	ENSG00000163344	PMVK	TRUE	TRUE	low_confidence	chr3	89458772	89459389	Other	chr3	89459287	89459513
chr1	154936905	154937020	ENSG00000163344	PMVK	TRUE	TRUE	low_confidence	chr3	89458772	89459389	Other	chr3	89459061	89459190
chr1	154937226	154937353	ENSG00000163344	PMVK	TRUE	TRUE	low_confidence	chr3	89458772	89459389	Other	chr3	89458769	89458897
chr1	154955207	154955382	ENSG00000163346	PBXIP1	TRUE	TRUE	high_confidence	chr3	89437406	89437521	Conserved	chr3	89437420	89437590
chr1	154955207	154955382	ENSG00000163346	PBXIP1	TRUE	TRUE	high_confidence	chr3	89437380	89437589	Conserved	chr3	89437420	89437590
chr1	154955207	154955382	ENSG00000163346	PBXIP1	TRUE	TRUE	high_confidence	chr3	89436587	89436817	Conserved	chr3	89437420	89437590
chr1	154983149	154983359	ENSG00000160688	FLAD1	TRUE	TRUE	low_confidence	chr3	89411823	89412116	Other	chr3	89411855	89412066
chr1	155000845	155000938	ENSG00000160685	ZBTB7B	TRUE	TRUE	low_confidence	chr3	89394559	89394795	Conserved	chr3	89395007	89395126
chr1	155001104	155001234	ENSG00000160685	ZBTB7B	TRUE	TRUE	low_confidence	chr3	89394559	89394795	Conserved	chr3	89394725	89394848
chr1	155001104	155001234	ENSG00000160685	ZBTB7B	TRUE	TRUE	low_confidence	chr3	89393701	89393822	Conserved	chr3	89394725	89394848
chr1	155010249	155010475	ENSG00000160685	ZBTB7B	TRUE	TRUE	high_confidence	chr3	89385565	89385738	Conserved	chr3	89385583	89385802
chr1	155010249	155010475	ENSG00000160685	ZBTB7B	TRUE	TRUE	high_confidence	chr3	89385507	89385758	Conserved	chr3	89385583	89385802
chr1	155013751	155013841	ENSG00000160685	ZBTB7B	TRUE	TRUE	no_overlap	NA	NA	NA	Conserved	chr3	89382244	89382315
chr1	155017635	155017740	ENSG00000160685	ZBTB7B	TRUE	TRUE	low_confidence	chr3	89378396	89378654	Conserved	chr3	89378391	89378511
chr1	155084819	155084965	ENSG00000143590	EFNA3	TRUE	TRUE	low_confidence	chr3	89316856	89317199	Other	chr3	89316915	89317045
chr1	155135680	155135878	ENSG00000169241	SLC50A1	TRUE	TRUE	low_confidence	chr3	89270434	89270733	Other	chr3	89270496	89270668
chr1	155173283	155173439	ENSG00000273088	AL713999.1	FALSE	TRUE	low_confidence	chr3	89246863	89247079	Other	chr3	89246311	89246455
chr1	155173283	155173439	ENSG00000273088	AL713999.1	FALSE	TRUE	low_confidence	chr3	89246330	89246591	Other	chr3	89246311	89246455
chr1	155193337	155193478	ENSG00000185499	MUC1	TRUE	TRUE	low_confidence	chr3	89228242	89228506	Other	chr3	89228511	89228643
chr1	155244552	155244954	ENSG00000177628	GBA	TRUE	TRUE	low_confidence	chr3	89196555	89196912	Other	chr3	89196299	89196784
chr1	155562767	155562982	ENSG00000116539	ASH1L	TRUE	TRUE	low_confidence	chr3	88950879	88951136	Other	chr3	88950191	88950400
chr1	155562767	155562982	ENSG00000116539	ASH1L	TRUE	TRUE	low_confidence	chr3	88949877	88950469	Other	chr3	88950191	88950400
chr1	155563128	155563321	ENSG00000116539	ASH1L	TRUE	TRUE	low_confidence	chr3	88950879	88951136	Other	chr3	88949876	88950054
chr1	155563128	155563321	ENSG00000116539	ASH1L	TRUE	TRUE	low_confidence	chr3	88949877	88950469	Other	chr3	88949876	88950054
chr1	155688729	155688844	ENSG00000132676	DAP3	TRUE	TRUE	low_confidence	chr3	88950879	88951136	Other	chr3	88950187	88950294
chr1	155688729	155688844	ENSG00000132676	DAP3	TRUE	TRUE	low_confidence	chr3	88949877	88950469	Other	chr3	88950187	88950294
chr1	155689054	155689120	ENSG00000132676	DAP3	TRUE	TRUE	low_confidence	chr3	88950879	88951136	Other	chr3	88949922	88949988
chr1	155689054	155689120	ENSG00000132676	DAP3	TRUE	TRUE	low_confidence	chr3	88949877	88950469	Other	chr3	88949922	88949988
chr1	155857240	155857341	ENSG00000116580	GON4L	FALSE	TRUE	low_confidence	chr3	88834925	88835408	Other	chr3	88835107	88835199
chr1	155860008	155860263	ENSG00000132718	SYT11	TRUE	TRUE	low_confidence	chr3	88832407	88832803	Other	chr3	88831780	88832061
chr1	155860008	155860263	ENSG00000132718	SYT11	TRUE	TRUE	low_confidence	chr3	88831295	88831446	Other	chr3	88831780	88832061
chr1	155946300	155946449	ENSG00000116584	ARHGEF2	TRUE	TRUE	no_overlap	NA	NA	NA	Alternate	chr3	88648237	88648346
chr1	155976244	155976407	ENSG00000116584	ARHGEF2	TRUE	TRUE	low_confidence	chr3	88622524	88622790	Alternate	chr3	88623133	88623295
chr1	155978500	155978589	ENSG00000116584	ARHGEF2	TRUE	TRUE	low_confidence	chr3	88621693	88621834	Alternate	chr3	88621111	88621200
chr1	155978500	155978589	ENSG00000116584	ARHGEF2	TRUE	TRUE	low_confidence	chr3	88621068	88621237	Alternate	chr3	88621111	88621200
chr1	155978500	155978589	ENSG00000116584	ARHGEF2	TRUE	TRUE	low_confidence	chr3	88620311	88620451	Alternate	chr3	88621111	88621200
chr1	156004967	156005229	ENSG00000163479	SSR2	TRUE	TRUE	no_overlap	NA	NA	NA	Other	chr3	88591255	88591501
chr1	156045213	156045391	ENSG00000160803	UBQLN4	TRUE	TRUE	no_overlap	NA	NA	NA	Other	chr3	88562067	88562217
chr1	156054700	156054881	ENSG00000116586	LAMTOR2	TRUE	TRUE	low_confidence	chr3	88553553	88553711	Other	chr3	88552872	88553052
chr1	156054700	156054881	ENSG00000116586	LAMTOR2	TRUE	TRUE	low_confidence	chr3	88553307	88553446	Other	chr3	88552872	88553052
chr1	156054700	156054881	ENSG00000116586	LAMTOR2	TRUE	TRUE	low_confidence	chr3	88552711	88553194	Other	chr3	88552872	88553052
chr1	156065324	156065499	ENSG00000132698	RAB25	TRUE	TRUE	no_overlap	NA	NA	NA	Hs-Specific	chr3	88545636	88545787
chr1	156066465	156066574	ENSG00000132698	RAB25	TRUE	TRUE	no_overlap	NA	NA	NA	Hs-Specific	chr3	88544658	88544745
chr1	156097121	156097372	ENSG00000160789	LMNA	TRUE	TRUE	high_confidence	chr3	88521746	88522060	Conserved	chr3	88521778	88522014
chr1	156097121	156097372	ENSG00000160789	LMNA	TRUE	TRUE	high_confidence	chr3	88522103	88522361	Conserved	chr3	88521778	88522014
chr1	156097121	156097372	ENSG00000160789	LMNA	TRUE	TRUE	high_confidence	chr3	88521663	88522092	Conserved	chr3	88521778	88522014
chr1	156097121	156097372	ENSG00000160789	LMNA	TRUE	TRUE	high_confidence	chr3	88520220	88520379	Conserved	chr3	88521778	88522014
chr1	156124617	156124776	ENSG00000160789	LMNA	TRUE	TRUE	no_overlap	NA	NA	NA	Conserved	chr3	88494271	88494374
chr1	156127163	156127492	ENSG00000160789	LMNA	TRUE	TRUE	high_confidence	chr3	88491244	88491464	Conserved	chr3	88491195	88492441
chr1	156127163	156127492	ENSG00000160789	LMNA	TRUE	TRUE	high_confidence	chr3	88491189	88491507	Conserved	chr3	88491195	88492441
chr1	156217986	156218238	ENSG00000160783	PMF1	TRUE	FALSE	no_overlap	NA	NA	NA	Other	NA	NA	NA
chr1	156282751	156283014	ENSG00000163472	TMEM79	TRUE	TRUE	high_confidence	chr3	88337461	88337577	Other	chr3	88336094	88336353
chr1	156282751	156283014	ENSG00000163472	TMEM79	TRUE	TRUE	high_confidence	chr3	88337390	88337889	Other	chr3	88336094	88336353
chr1	156282751	156283014	ENSG00000163472	TMEM79	TRUE	TRUE	high_confidence	chr3	88335903	88336567	Other	chr3	88336094	88336353
chr1	156338251	156338393	ENSG00000163467	TSACC	TRUE	TRUE	low_confidence	chr3	88297362	88297610	Other	chr3	88297035	88297172
chr1	156338251	156338393	ENSG00000163467	TSACC	TRUE	TRUE	low_confidence	chr3	88296554	88297239	Other	chr3	88297035	88297172
chr1	156338575	156338817	ENSG00000163467	TSACC	TRUE	TRUE	low_confidence	chr3	88297362	88297610	Other	chr3	88296612	88296854
chr1	156338575	156338817	ENSG00000163467	TSACC	TRUE	TRUE	low_confidence	chr3	88296554	88297239	Other	chr3	88296612	88296854
chr1	156338575	156338817	ENSG00000163467	TSACC	TRUE	TRUE	low_confidence	chr3	88295056	88295434	Other	chr3	88296612	88296854
chr1	156421684	156421816	ENSG00000125462	C1orf61	FALSE	TRUE	no_overlap	NA	NA	NA	Other	chr3	88214435	88214556
chr1	156488605	156488834	ENSG00000116604	MEF2D	TRUE	TRUE	high_confidence	chr3	88150965	88151151	Conserved	chr3	88150992	88151174
chr1	156488605	156488834	ENSG00000116604	MEF2D	TRUE	TRUE	high_confidence	chr3	88150940	88151177	Conserved	chr3	88150992	88151174
chr1	156488605	156488834	ENSG00000116604	MEF2D	TRUE	TRUE	high_confidence	chr3	88150485	88150618	Conserved	chr3	88150992	88151174
chr1	156500979	156501100	ENSG00000116604	MEF2D	TRUE	TRUE	low_confidence	chr3	88142160	88142471	Conserved	chr3	88142159	88142233
chr1	156500979	156501100	ENSG00000116604	MEF2D	TRUE	TRUE	low_confidence	chr3	88141933	88142064	Conserved	chr3	88142159	88142233
chr1	156501357	156501526	ENSG00000116604	MEF2D	TRUE	TRUE	low_confidence	chr3	88142160	88142471	Conserved	chr3	88141893	88142059
chr1	156501357	156501526	ENSG00000116604	MEF2D	TRUE	TRUE	low_confidence	chr3	88141933	88142064	Conserved	chr3	88141893	88142059
chr1	156504892	156505315	ENSG00000116604	MEF2D	TRUE	TRUE	low_confidence	chr3	88138287	88138857	Conserved	chr3	88138576	88138963
chr1	156505368	156505511	ENSG00000116604	MEF2D	TRUE	TRUE	low_confidence	chr3	88138287	88138857	Conserved	chr3	88138381	88138526
chr1	156508166	156508342	ENSG00000116604	MEF2D	TRUE	TRUE	no_overlap	NA	NA	NA	Conserved	chr3	88133678	88133844
chr1	156601433	156601525	ENSG00000160818	GPATCH4	TRUE	TRUE	high_confidence	chr3	88043005	88043236	Conserved	chr3	88043067	88043155
chr1	156601433	156601525	ENSG00000160818	GPATCH4	TRUE	TRUE	high_confidence	chr3	88042991	88043464	Conserved	chr3	88043067	88043155
chr1	156660114	156660232	ENSG00000132692	BCAN	TRUE	TRUE	low_confidence	chr3	87986845	87987215	Other	chr3	87987053	87987149
chr1	156661435	156661562	ENSG00000132692	BCAN	TRUE	TRUE	low_confidence	chr3	87986845	87987215	Other	chr3	87985977	87986117
chr1	156728673	156728948	ENSG00000143303	RRNAD1	TRUE	TRUE	low_confidence	chr3	87929995	87930857	Other	chr3	87930122	87930352
chr1	156741048	156741185	ENSG00000143314	MRPL24	TRUE	TRUE	high_confidence	chr3	87919377	87919492	Conserved	chr3	87919578	87919710
chr1	156741048	156741185	ENSG00000143314	MRPL24	TRUE	TRUE	high_confidence	chr3	87919654	87919814	Conserved	chr3	87919578	87919710
chr1	156741048	156741185	ENSG00000143314	MRPL24	TRUE	TRUE	high_confidence	chr3	87919359	87919573	Conserved	chr3	87919578	87919710
chr1	156751767	156751993	ENSG00000143321	HDGF	TRUE	TRUE	low_confidence	chr3	87906760	87906869	Other	chr3	87906118	87906321
chr1	156751767	156751993	ENSG00000143321	HDGF	TRUE	TRUE	low_confidence	chr3	87905940	87906427	Other	chr3	87906118	87906321
chr1	156767108	156767209	ENSG00000143294	PRCC	TRUE	TRUE	high_confidence	chr3	87885836	87885961	Conserved	chr3	87885904	87885992
chr1	156767108	156767209	ENSG00000143294	PRCC	TRUE	TRUE	high_confidence	chr3	87885279	87886057	Conserved	chr3	87885904	87885992
chr1	156767320	156767430	ENSG00000143294	PRCC	TRUE	TRUE	high_confidence	chr3	87885836	87885961	Conserved	chr3	87885686	87885808
chr1	156767320	156767430	ENSG00000143294	PRCC	TRUE	TRUE	high_confidence	chr3	87885279	87886057	Conserved	chr3	87885686	87885808
chr1	156807690	156807947	ENSG00000027869	SH2D2A	TRUE	TRUE	no_overlap	NA	NA	NA	Other	chr3	87853317	87853529
chr1	156816645	156817031	ENSG00000198400	NTRK1	TRUE	TRUE	high_confidence	chr3	87846567	87846760	Other	chr3	87846827	87847122
chr1	156816645	156817031	ENSG00000198400	NTRK1	TRUE	TRUE	high_confidence	chr3	87847781	87848136	Other	chr3	87846827	87847122
chr1	156816645	156817031	ENSG00000198400	NTRK1	TRUE	TRUE	high_confidence	chr3	87846518	87847151	Other	chr3	87846827	87847122
chr1	157133585	157133795	ENSG00000117036	ETV3	TRUE	TRUE	high_confidence	chr3	87529583	87529895	Conserved	chr3	87529651	87529866
chr1	157133585	157133795	ENSG00000117036	ETV3	TRUE	TRUE	high_confidence	chr3	87529569	87529931	Conserved	chr3	87529651	87529866
chr1	157133585	157133795	ENSG00000117036	ETV3	TRUE	TRUE	high_confidence	chr3	87528901	87529018	Conserved	chr3	87529651	87529866
chr1	157138409	157138634	ENSG00000117036	ETV3	TRUE	TRUE	low_confidence	chr3	87525425	87525667	Conserved	chr3	87525530	87525571
chr1	158819614	158819807	ENSG00000163563	MNDA	FALSE	TRUE	no_overlap	NA	NA	NA	Other	chr1	174035307	174035502
chr1	158924804	158924943	ENSG00000163564	PYHIN1	FALSE	FALSE	no_overlap	NA	NA	NA	Other	NA	NA	NA
chr1	158930574	158930788	ENSG00000163564	PYHIN1	FALSE	TRUE	high_confidence	chr1	173880293	173880452	Other	chr1	173881546	173881602
chr1	158930574	158930788	ENSG00000163564	PYHIN1	FALSE	TRUE	high_confidence	chr1	173880249	173880593	Other	chr1	173881546	173881602
chr1	158930574	158930788	ENSG00000163564	PYHIN1	FALSE	TRUE	high_confidence	chr1	173879753	173880046	Other	chr1	173881546	173881602
chr1	158931460	158931619	ENSG00000163564	PYHIN1	FALSE	TRUE	high_confidence	chr1	173880293	173880452	Other	chr1	173880076	173880244
chr1	158931460	158931619	ENSG00000163564	PYHIN1	FALSE	TRUE	high_confidence	chr1	173880249	173880593	Other	chr1	173880076	173880244
chr1	158931460	158931619	ENSG00000163564	PYHIN1	FALSE	TRUE	high_confidence	chr1	173879753	173880046	Other	chr1	173880076	173880244
chr1	159008842	159009097	ENSG00000163565	IFI16	FALSE	TRUE	low_confidence	chr1	173490903	173491435	Other	chr1	173491967	173492103
[truncated: 23,436 more rows]

## Sheet: Mm T-bet binding sites
Mouse.chr	Mouse.site_start	Mouse.site_end	Mouse.ensembl_gene_id	mgi_symbol	ortholog	liftOver	T-bet binding at liftover site in Hs	Human.chr	Human.site_start	Human.site_end	Human.ID	Gene type	Human.chr.liftOver	Human.liftOver.site_start	Human.liftOver.site_end
chr1	6454324	6454617	ENSMUSG00000033740	St18	TRUE	TRUE	no_overlap	NA	NA	NA	NA	Other	chr8	52460110	52460444
chr1	6467178	6467351	ENSMUSG00000033740	St18	TRUE	TRUE	no_overlap	NA	NA	NA	NA	Other	NA	NA	NA
chr1	7397034	7397138	ENSMUSG00000051285	Pcmtd1	TRUE	FALSE	no_overlap	NA	NA	NA	NA	Other	NA	NA	NA
chr1	9859074	9859146	ENSMUSG00000025915	Sgk3	TRUE	TRUE	no_overlap	NA	NA	NA	NA	Other	NA	NA	NA
chr1	12644727	12644914	ENSMUSG00000016918	Sulf1	TRUE	TRUE	no_overlap	NA	NA	NA	NA	Other	chr8	69437288	69437359
chr1	13155419	13155591	ENSMUSG00000005886	Ncoa2	TRUE	TRUE	low_confidence	chr8	70130457	70130910	chr8_70130457_70130910|chr8_70131376_70131550	Conserved	chr8	70130477	70130647
chr1	13155419	13155591	ENSMUSG00000005886	Ncoa2	TRUE	TRUE	low_confidence	chr8	70131376	70131550	chr8_70130457_70130910|chr8_70131376_70131550	Conserved	chr8	70130477	70130647
chr1	13161473	13161652	ENSMUSG00000005886	Ncoa2	TRUE	TRUE	high_confidence	chr8	70141632	70141764	chr8_70141632_70141764|chr8_70141464_70141815	Conserved	chr8	70140097	70140298
chr1	13161473	13161652	ENSMUSG00000005886	Ncoa2	TRUE	TRUE	high_confidence	chr8	70141464	70141815	chr8_70141632_70141764|chr8_70141464_70141815	Conserved	chr8	70140097	70140298
chr1	13162396	13162646	ENSMUSG00000005886	Ncoa2	TRUE	TRUE	high_confidence	chr8	70141632	70141764	chr8_70141632_70141764|chr8_70141464_70141815|chr8_70142317_70142426	Conserved	chr8	70141512	70141765
chr1	13162396	13162646	ENSMUSG00000005886	Ncoa2	TRUE	TRUE	high_confidence	chr8	70141464	70141815	chr8_70141632_70141764|chr8_70141464_70141815|chr8_70142317_70142426	Conserved	chr8	70141512	70141765
chr1	13162396	13162646	ENSMUSG00000005886	Ncoa2	TRUE	TRUE	high_confidence	chr8	70142317	70142426	chr8_70141632_70141764|chr8_70141464_70141815|chr8_70142317_70142426	Conserved	chr8	70141512	70141765
chr1	13258071	13258268	ENSMUSG00000005886	Ncoa2	TRUE	TRUE	no_overlap	NA	NA	NA	NA	Conserved	NA	NA	NA
chr1	13267557	13267737	ENSMUSG00000005886	Ncoa2	TRUE	TRUE	no_overlap	NA	NA	NA	NA	Conserved	chr8	70272407	70272558
chr1	13301607	13301716	ENSMUSG00000005886	Ncoa2	TRUE	TRUE	no_overlap	NA	NA	NA	NA	Conserved	chr8	70315661	70315772
chr1	13373065	13373146	ENSMUSG00000005886	Ncoa2	TRUE	TRUE	high_confidence	chr8	70402634	70402797	chr8_70402634_70402797|chr8_70402109_70402583|chr8_70402597_70402893|chr8_70403333_70403442|chr8_70403733_70403866	Conserved	chr8	70402702	70402777
chr1	13373065	13373146	ENSMUSG00000005886	Ncoa2	TRUE	TRUE	high_confidence	chr8	70402109	70402583	chr8_70402634_70402797|chr8_70402109_70402583|chr8_70402597_70402893|chr8_70403333_70403442|chr8_70403733_70403866	Conserved	chr8	70402702	70402777
chr1	13373065	13373146	ENSMUSG00000005886	Ncoa2	TRUE	TRUE	high_confidence	chr8	70402597	70402893	chr8_70402634_70402797|chr8_70402109_70402583|chr8_70402597_70402893|chr8_70403333_70403442|chr8_70403733_70403866	Conserved	chr8	70402702	70402777
chr1	13373065	13373146	ENSMUSG00000005886	Ncoa2	TRUE	TRUE	high_confidence	chr8	70403333	70403442	chr8_70402634_70402797|chr8_70402109_70402583|chr8_70402597_70402893|chr8_70403333_70403442|chr8_70403733_70403866	Conserved	chr8	70402702	70402777
chr1	13373065	13373146	ENSMUSG00000005886	Ncoa2	TRUE	TRUE	high_confidence	chr8	70403733	70403866	chr8_70402634_70402797|chr8_70402109_70402583|chr8_70402597_70402893|chr8_70403333_70403442|chr8_70403733_70403866	Conserved	chr8	70402702	70402777
chr1	13383638	13383761	ENSMUSG00000005886	Ncoa2	TRUE	FALSE	no_overlap	NA	NA	NA	NA	Conserved	NA	NA	NA
chr1	13454714	13454819	ENSMUSG00000005886	Ncoa2	TRUE	TRUE	no_overlap	NA	NA	NA	NA	Conserved	chr8	70476028	70476161
chr1	13462818	13462924	ENSMUSG00000005886	Ncoa2	TRUE	TRUE	no_overlap	NA	NA	NA	NA	Conserved	NA	NA	NA
chr1	13589942	13590030	ENSMUSG00000025935	Tram1	TRUE	TRUE	high_confidence	chr8	70608248	70608501	chr8_70608248_70608501|chr8_70607466_70607558|chr8_70607703_70607828|chr8_70608133_70608645	Conserved	chr8	70608394	70608482
chr1	13589942	13590030	ENSMUSG00000025935	Tram1	TRUE	TRUE	high_confidence	chr8	70607466	70607558	chr8_70608248_70608501|chr8_70607466_70607558|chr8_70607703_70607828|chr8_70608133_70608645	Conserved	chr8	70608394	70608482
chr1	13589942	13590030	ENSMUSG00000025935	Tram1	TRUE	TRUE	high_confidence	chr8	70607703	70607828	chr8_70608248_70608501|chr8_70607466_70607558|chr8_70607703_70607828|chr8_70608133_70608645	Conserved	chr8	70608394	70608482
chr1	13589942	13590030	ENSMUSG00000025935	Tram1	TRUE	TRUE	high_confidence	chr8	70608133	70608645	chr8_70608248_70608501|chr8_70607466_70607558|chr8_70607703_70607828|chr8_70608133_70608645	Conserved	chr8	70608394	70608482
chr1	13593290	13593421	ENSMUSG00000025935	Tram1	TRUE	FALSE	no_overlap	NA	NA	NA	NA	Conserved	NA	NA	NA
chr1	13615993	13616192	ENSMUSG00000025937	Lactb2	TRUE	TRUE	no_overlap	NA	NA	NA	NA	Other	chr8	70634295	70634304
chr1	13639593	13639910	ENSMUSG00000025937	Lactb2	TRUE	TRUE	no_overlap	NA	NA	NA	NA	Other	NA	NA	NA
chr1	14746961	14747117	ENSMUSG00000025930	Msc	TRUE	TRUE	low_confidence	chr8	71838499	71838678	chr8_71838499_71838678	Other	chr8	71838645	71838821
chr1	14925028	14925137	ENSMUSG00000032769	Trpa1	TRUE	FALSE	no_overlap	NA	NA	NA	NA	Other	NA	NA	NA
chr1	16228416	16228553	ENSMUSG00000025920	Stau2	TRUE	TRUE	no_overlap	NA	NA	NA	NA	Other	chr8	73419986	73420121
chr1	16534232	16534427	ENSMUSG00000025920	Stau2	TRUE	TRUE	no_overlap	NA	NA	NA	NA	Other	NA	NA	NA
chr1	16747249	16747606	ENSMUSG00000025779	Ly96	TRUE	TRUE	no_overlap	NA	NA	NA	NA	Other	chr8	74051044	74051314
chr1	20740707	20740839	ENSMUSG00000025929	Il17a	TRUE	TRUE	no_overlap	NA	NA	NA	NA	Alternate	chr6	52213367	52213500
chr1	20759979	20760031	ENSMUSG00000041872	Il17f	TRUE	TRUE	high_confidence	chr6	52227642	52227757	chr6_52227642_52227757|chr6_52227487_52227880	Conserved	chr6	52227678	52227730
chr1	20759979	20760031	ENSMUSG00000041872	Il17f	TRUE	TRUE	high_confidence	chr6	52227487	52227880	chr6_52227642_52227757|chr6_52227487_52227880	Conserved	chr6	52227678	52227730
chr1	20766688	20766885	ENSMUSG00000041872	Il17f	TRUE	TRUE	high_confidence	chr6	52231515	52231643	chr6_52231515_52231643|chr6_52231793_52232064|chr6_52231483_52232175	Conserved	chr6	52231512	52231710
chr1	20766688	20766885	ENSMUSG00000041872	Il17f	TRUE	TRUE	high_confidence	chr6	52231793	52232064	chr6_52231515_52231643|chr6_52231793_52232064|chr6_52231483_52232175	Conserved	chr6	52231512	52231710
chr1	20766688	20766885	ENSMUSG00000041872	Il17f	TRUE	TRUE	high_confidence	chr6	52231483	52232175	chr6_52231515_52231643|chr6_52231793_52232064|chr6_52231483_52232175	Conserved	chr6	52231512	52231710
chr1	20825131	20825329	ENSMUSG00000041859	Mcm3	TRUE	TRUE	no_overlap	NA	NA	NA	NA	Other	NA	NA	NA
chr1	21425771	21425930	ENSMUSG00000028033	Kcnq5	TRUE	TRUE	no_overlap	NA	NA	NA	NA	Other	chr6	73164548	73164668
chr1	21780839	21781086	ENSMUSG00000028033	Kcnq5	TRUE	TRUE	no_overlap	NA	NA	NA	NA	Other	chr6	72815925	72816180
chr1	30793069	30793260	ENSMUSG00000048874	Phf3	TRUE	TRUE	no_overlap	NA	NA	NA	NA	Other	chr6	63740813	63741032
chr1	30949755	30949919	ENSMUSG00000048874	Phf3	TRUE	TRUE	low_confidence	chr6	63572173	63572671	chr6_63572173_63572671|chr6_63571665_63571847	Other	chr6	63572308	63572482
chr1	30949755	30949919	ENSMUSG00000048874	Phf3	TRUE	TRUE	low_confidence	chr6	63571665	63571847	chr6_63572173_63572671|chr6_63571665_63571847	Other	chr6	63572308	63572482
chr1	33584312	33584435	ENSMUSG00000026134	Prim2	TRUE	FALSE	no_overlap	NA	NA	NA	NA	Other	NA	NA	NA
chr1	33612195	33612396	ENSMUSG00000026134	Prim2	TRUE	TRUE	no_overlap	NA	NA	NA	NA	Other	chr6	60314497	60314697
chr1	33649178	33649275	ENSMUSG00000026134	Prim2	TRUE	TRUE	no_overlap	NA	NA	NA	NA	Other	chr6	60252893	60252921
chr1	33814508	33814658	ENSMUSG00000042197	Zfp451	TRUE	TRUE	high_confidence	chr6	57090008	57090189	chr6_57090008_57090189|chr6_57089760_57090306	Conserved	chr6	57089954	57090103
chr1	33814508	33814658	ENSMUSG00000042197	Zfp451	TRUE	TRUE	high_confidence	chr6	57089760	57090306	chr6_57090008_57090189|chr6_57089760_57090306	Conserved	chr6	57089954	57090103
chr1	33883479	33883712	ENSMUSG00000042182	Bend6	TRUE	TRUE	no_overlap	NA	NA	NA	NA	Other	chr6	56981692	56981892
chr1	33900283	33900422	ENSMUSG00000042182	Bend6	TRUE	TRUE	no_overlap	NA	NA	NA	NA	Other	chr6	56960092	56960230
chr1	33909259	33909414	ENSMUSG00000026131	Dst	TRUE	TRUE	no_overlap	NA	NA	NA	NA	Other	chr6	56953398	56953564
chr1	33942735	33943017	ENSMUSG00000026131	Dst	TRUE	TRUE	no_overlap	NA	NA	NA	NA	Other	NA	NA	NA
chr1	34478901	34479206	ENSMUSG00000026126	Ptpn18	TRUE	FALSE	no_overlap	NA	NA	NA	NA	Other	NA	NA	NA
chr1	34510651	34510942	ENSMUSG00000026125	Prss39	FALSE	FALSE	no_overlap	NA	NA	NA	NA	Other	NA	NA	NA
chr1	34802003	34802100	ENSMUSG00000037509	Arhgef4	TRUE	TRUE	no_overlap	NA	NA	NA	NA	Other	chr2	131035303	131035394
chr1	34843386	34843489	ENSMUSG00000037503	Fam168b	TRUE	TRUE	no_overlap	NA	NA	NA	NA	Other	NA	NA	NA
chr1	34851644	34851836	ENSMUSG00000026123	Plekhb2	TRUE	FALSE	no_overlap	NA	NA	NA	NA	Other	NA	NA	NA
chr1	36068210	36068373	ENSMUSG00000045216	Hs6st1	TRUE	TRUE	high_confidence	chr2	128318837	128319010	chr2_128318837_128319010|chr2_128318778_128319035	Conserved	chr2	128318876	128319015
chr1	36068210	36068373	ENSMUSG00000045216	Hs6st1	TRUE	TRUE	high_confidence	chr2	128318778	128319035	chr2_128318837_128319010|chr2_128318778_128319035	Conserved	chr2	128318876	128319015
chr1	36073257	36073415	ENSMUSG00000045216	Hs6st1	TRUE	TRUE	no_overlap	NA	NA	NA	NA	Conserved	NA	NA	NA
chr1	36160326	36160453	ENSMUSG00000037470	Uggt1	TRUE	TRUE	no_overlap	NA	NA	NA	NA	Other	chr2	128176364	128176467
chr1	36235170	36235391	ENSMUSG00000037470	Uggt1	TRUE	TRUE	no_overlap	NA	NA	NA	NA	Other	NA	NA	NA
chr1	36264233	36264484	ENSMUSG00000047180	Neurl3	TRUE	FALSE	no_overlap	NA	NA	NA	NA	Other	NA	NA	NA
chr1	36266462	36266625	ENSMUSG00000047180	Neurl3	TRUE	TRUE	no_overlap	NA	NA	NA	NA	Other	chr2	96498355	96498484
chr1	36293609	36293753	ENSMUSG00000037447	Arid5a	TRUE	FALSE	no_overlap	NA	NA	NA	NA	Conserved	NA	NA	NA
chr1	36294549	36294692	ENSMUSG00000037447	Arid5a	TRUE	FALSE	no_overlap	NA	NA	NA	NA	Conserved	NA	NA	NA
chr1	36296652	36296865	ENSMUSG00000037447	Arid5a	TRUE	TRUE	high_confidence	chr2	96524283	96524439	chr2_96524283_96524439|chr2_96524235_96524963	Conserved	chr2	96524230	96524464
chr1	36296652	36296865	ENSMUSG00000037447	Arid5a	TRUE	TRUE	high_confidence	chr2	96524235	96524963	chr2_96524283_96524439|chr2_96524235_96524963	Conserved	chr2	96524230	96524464
chr1	36307924	36308158	ENSMUSG00000037447	Arid5a	TRUE	TRUE	high_confidence	chr2	96537006	96537490	chr2_96537006_96537490|chr2_96536570_96536873|chr2_96536991_96537566|chr2_96537954_96538076	Conserved	chr2	96537080	96537291
chr1	36307924	36308158	ENSMUSG00000037447	Arid5a	TRUE	TRUE	high_confidence	chr2	96536570	96536873	chr2_96537006_96537490|chr2_96536570_96536873|chr2_96536991_96537566|chr2_96537954_96538076	Conserved	chr2	96537080	96537291
chr1	36307924	36308158	ENSMUSG00000037447	Arid5a	TRUE	TRUE	high_confidence	chr2	96536991	96537566	chr2_96537006_96537490|chr2_96536570_96536873|chr2_96536991_96537566|chr2_96537954_96538076	Conserved	chr2	96537080	96537291
chr1	36307924	36308158	ENSMUSG00000037447	Arid5a	TRUE	TRUE	high_confidence	chr2	96537954	96538076	chr2_96537006_96537490|chr2_96536570_96536873|chr2_96536991_96537566|chr2_96537954_96538076	Conserved	chr2	96537080	96537291
chr1	36309188	36309317	ENSMUSG00000037447	Arid5a	TRUE	TRUE	high_confidence	chr2	96537006	96537490	chr2_96537006_96537490|chr2_96538660_96539286|chr2_96536991_96537566|chr2_96537954_96538076|chr2_96538591_96539354	Conserved	NA	NA	NA
chr1	36309188	36309317	ENSMUSG00000037447	Arid5a	TRUE	TRUE	high_confidence	chr2	96538660	96539286	chr2_96537006_96537490|chr2_96538660_96539286|chr2_96536991_96537566|chr2_96537954_96538076|chr2_96538591_96539354	Conserved	NA	NA	NA
chr1	36309188	36309317	ENSMUSG00000037447	Arid5a	TRUE	TRUE	high_confidence	chr2	96536991	96537566	chr2_96537006_96537490|chr2_96538660_96539286|chr2_96536991_96537566|chr2_96537954_96538076|chr2_96538591_96539354	Conserved	NA	NA	NA
chr1	36309188	36309317	ENSMUSG00000037447	Arid5a	TRUE	TRUE	high_confidence	chr2	96537954	96538076	chr2_96537006_96537490|chr2_96538660_96539286|chr2_96536991_96537566|chr2_96537954_96538076|chr2_96538591_96539354	Conserved	NA	NA	NA
chr1	36309188	36309317	ENSMUSG00000037447	Arid5a	TRUE	TRUE	high_confidence	chr2	96538591	96539354	chr2_96537006_96537490|chr2_96538660_96539286|chr2_96536991_96537566|chr2_96537954_96538076|chr2_96538591_96539354	Conserved	NA	NA	NA
chr1	36325837	36326213	ENSMUSG00000037447	Arid5a	TRUE	TRUE	low_confidence	chr2	96557051	96557215	chr2_96557051_96557215	Conserved	chr2	96556726	96557138
chr1	36761776	36761928	ENSMUSG00000026117	Zap70	TRUE	TRUE	low_confidence	chr2	97713367	97713859	chr2_97713367_97713859	Other	chr2	97713516	97713660
chr1	36879271	36879388	ENSMUSG00000026116	Tmem131	TRUE	FALSE	no_overlap	NA	NA	NA	NA	Alternate	NA	NA	NA
chr1	36883812	36884044	ENSMUSG00000026116	Tmem131	TRUE	TRUE	no_overlap	NA	NA	NA	NA	Alternate	chr2	97912009	97912285
chr1	37000398	37000522	ENSMUSG00000050122	Vwa3b	TRUE	FALSE	no_overlap	NA	NA	NA	NA	Other	NA	NA	NA
chr1	37030822	37030911	ENSMUSG00000050122	Vwa3b	TRUE	TRUE	no_overlap	NA	NA	NA	NA	Other	chr2	98089063	98089068
chr1	37299664	37299815	ENSMUSG00000026113	Inpp4a	TRUE	TRUE	low_confidence	chr2	98444826	98444994	chr2_98444826_98444994	Conserved	chr2	98444474	98444751
chr1	37317806	37317940	ENSMUSG00000026113	Inpp4a	TRUE	TRUE	high_confidence	chr2	98464090	98464242	chr2_98464090_98464242|chr2_98464908_98465254|chr2_98464008_98464353|chr2_98464509_98464679|chr2_98464875_98465315	Conserved	chr2	98463970	98464152
chr1	37317806	37317940	ENSMUSG00000026113	Inpp4a	TRUE	TRUE	high_confidence	chr2	98464908	98465254	chr2_98464090_98464242|chr2_98464908_98465254|chr2_98464008_98464353|chr2_98464509_98464679|chr2_98464875_98465315	Conserved	chr2	98463970	98464152
chr1	37317806	37317940	ENSMUSG00000026113	Inpp4a	TRUE	TRUE	high_confidence	chr2	98464008	98464353	chr2_98464090_98464242|chr2_98464908_98465254|chr2_98464008_98464353|chr2_98464509_98464679|chr2_98464875_98465315	Conserved	chr2	98463970	98464152
chr1	37317806	37317940	ENSMUSG00000026113	Inpp4a	TRUE	TRUE	high_confidence	chr2	98464509	98464679	chr2_98464090_98464242|chr2_98464908_98465254|chr2_98464008_98464353|chr2_98464509_98464679|chr2_98464875_98465315	Conserved	chr2	98463970	98464152
chr1	37317806	37317940	ENSMUSG00000026113	Inpp4a	TRUE	TRUE	high_confidence	chr2	98464875	98465315	chr2_98464090_98464242|chr2_98464908_98465254|chr2_98464008_98464353|chr2_98464509_98464679|chr2_98464875_98465315	Conserved	chr2	98463970	98464152
chr1	37327417	37327558	ENSMUSG00000026113	Inpp4a	TRUE	TRUE	low_confidence	chr2	98485159	98485430	chr2_98485159_98485430	Conserved	chr2	98484784	98484991
chr1	37478047	37478113	ENSMUSG00000026110	Mgat4a	TRUE	FALSE	no_overlap	NA	NA	NA	NA	Alternate	NA	NA	NA
chr1	37478509	37478683	ENSMUSG00000026110	Mgat4a	TRUE	FALSE	no_overlap	NA	NA	NA	NA	Alternate	NA	NA	NA
chr1	37496875	37497011	ENSMUSG00000026110	Mgat4a	TRUE	TRUE	no_overlap	NA	NA	NA	NA	Alternate	chr2	98676316	98676459
chr1	37615121	37615240	ENSMUSG00000026090	2010300C02Rik	TRUE	TRUE	no_overlap	NA	NA	NA	NA	Other	NA	NA	NA
chr1	37997916	37998045	ENSMUSG00000026083	Eif5b	TRUE	TRUE	high_confidence	chr2	99336347	99336584	chr2_99336347_99336584|chr2_99337332_99337427|chr2_99336113_99336639|chr2_99337159_99337461	Conserved	chr2	99337180	99337310
chr1	37997916	37998045	ENSMUSG00000026083	Eif5b	TRUE	TRUE	high_confidence	chr2	99337332	99337427	chr2_99336347_99336584|chr2_99337332_99337427|chr2_99336113_99336639|chr2_99337159_99337461	Conserved	chr2	99337180	99337310
chr1	37997916	37998045	ENSMUSG00000026083	Eif5b	TRUE	TRUE	high_confidence	chr2	99336113	99336639	chr2_99336347_99336584|chr2_99337332_99337427|chr2_99336113_99336639|chr2_99337159_99337461	Conserved	chr2	99337180	99337310
chr1	37997916	37998045	ENSMUSG00000026083	Eif5b	TRUE	TRUE	high_confidence	chr2	99337159	99337461	chr2_99336347_99336584|chr2_99337332_99337427|chr2_99336113_99336639|chr2_99337159_99337461	Conserved	chr2	99337180	99337310
chr1	38437856	38437987	ENSMUSG00000037138	Aff3	TRUE	TRUE	no_overlap	NA	NA	NA	NA	Other	chr2	99880353	99880490
chr1	38662703	38662877	ENSMUSG00000037138	Aff3	TRUE	TRUE	no_overlap	NA	NA	NA	NA	Other	chr2	100140161	100140332
chr1	38664933	38665100	ENSMUSG00000037138	Aff3	TRUE	TRUE	low_confidence	chr2	100142551	100142800	chr2_100142551_100142800	Other	chr2	100142561	100142742
chr1	38694213	38694433	ENSMUSG00000037138	Aff3	TRUE	TRUE	no_overlap	NA	NA	NA	NA	Other	chr2	100180345	100180577
chr1	38723686	38723853	ENSMUSG00000037138	Aff3	TRUE	TRUE	no_overlap	NA	NA	NA	NA	Other	NA	NA	NA
chr1	38777532	38777873	ENSMUSG00000048814	Lonrf2	TRUE	TRUE	no_overlap	NA	NA	NA	NA	Other	chr2	100247637	100247985
chr1	39089927	39090010	ENSMUSG00000026078	Pdcl3	TRUE	FALSE	no_overlap	NA	NA	NA	NA	Other	NA	NA	NA
chr1	39193056	39193209	ENSMUSG00000026077	Npas2	TRUE	TRUE	no_overlap	NA	NA	NA	NA	Other	chr2	100819410	100819599
chr1	39196823	39197048	ENSMUSG00000026077	Npas2	TRUE	TRUE	no_overlap	NA	NA	NA	NA	Other	chr2	100823369	100823647
chr1	39205121	39205240	ENSMUSG00000026077	Npas2	TRUE	TRUE	no_overlap	NA	NA	NA	NA	Other	chr2	100833518	100833641
chr1	39234770	39234979	ENSMUSG00000026077	Npas2	TRUE	TRUE	no_overlap	NA	NA	NA	NA	Other	chr2	100865005	100865211
chr1	39556089	39556372	ENSMUSG00000048234	Rnf149	TRUE	TRUE	no_overlap	NA	NA	NA	NA	Conserved	chr2	101282539	101282896
chr1	39559173	39559260	ENSMUSG00000048234	Rnf149	TRUE	TRUE	no_overlap	NA	NA	NA	NA	Conserved	chr2	101286748	101286875
chr1	39577570	39577680	ENSMUSG00000048234	Rnf149	TRUE	TRUE	high_confidence	chr2	101308855	101308900	chr2_101308855_101308900|chr2_101308546_101308999	Conserved	chr2	101308904	101309066
chr1	39577570	39577680	ENSMUSG00000048234	Rnf149	TRUE	TRUE	high_confidence	chr2	101308546	101308999	chr2_101308855_101308900|chr2_101308546_101308999	Conserved	chr2	101308904	101309066
chr1	39578641	39578761	ENSMUSG00000048234	Rnf149	TRUE	TRUE	no_overlap	NA	NA	NA	NA	Conserved	chr15	96878737	96878861
chr1	39651325	39651436	ENSMUSG00000050967	Creg2	TRUE	TRUE	low_confidence	chr2	101387453	101387572	chr2_101387453_101387572	Other	NA	NA	NA
chr1	39713979	39714293	ENSMUSG00000057173	Rfx8	TRUE	TRUE	no_overlap	NA	NA	NA	NA	Alternate	chr2	101464161	101464505
chr1	39714882	39715010	ENSMUSG00000057173	Rfx8	TRUE	TRUE	no_overlap	NA	NA	NA	NA	Alternate	chr2	101464993	101465120
chr1	39734530	39734646	ENSMUSG00000057173	Rfx8	TRUE	TRUE	no_overlap	NA	NA	NA	NA	Alternate	chr2	101484832	101484901
chr1	39761129	39761472	ENSMUSG00000057173	Rfx8	TRUE	TRUE	no_overlap	NA	NA	NA	NA	Alternate	chr2	101518532	101518934
chr1	39842205	39842618	ENSMUSG00000091937	Gm3646	FALSE	TRUE	low_confidence	chr2	101622753	101622939	chr2_101622753_101622939|chr2_101623200_101623438	Other	chr2	101622727	101623092
chr1	39842205	39842618	ENSMUSG00000091937	Gm3646	FALSE	TRUE	low_confidence	chr2	101623200	101623438	chr2_101622753_101622939|chr2_101623200_101623438	Other	chr2	101622727	101623092
chr1	40053917	40054102	ENSMUSG00000026074	Map4k4	TRUE	FALSE	no_overlap	NA	NA	NA	NA	Other	NA	NA	NA
chr1	40116578	40116681	ENSMUSG00000026073	Il1r2	TRUE	TRUE	low_confidence	chr2	102020731	102020917	chr2_102020731_102020917	Other	chr2	102020754	102020863
chr1	40235690	40235788	ENSMUSG00000026072	Il1r1	TRUE	TRUE	low_confidence	chr2	102114409	102114703	chr2_102114409_102114703	Other	NA	NA	NA
chr1	40358802	40359167	ENSMUSG00000070942	Il1rl2	TRUE	TRUE	high_confidence	chr2	102227744	102228056	chr2_102227744_102228056|chr2_102227676_102228092	Conserved	chr2	102227658	102228070
chr1	40358802	40359167	ENSMUSG00000070942	Il1rl2	TRUE	TRUE	high_confidence	chr2	102227676	102228092	chr2_102227744_102228056|chr2_102227676_102228092	Conserved	chr2	102227658	102228070
chr1	40382747	40382961	ENSMUSG00000070942	Il1rl2	TRUE	FALSE	no_overlap	NA	NA	NA	NA	Conserved	NA	NA	NA
chr1	40386181	40386582	ENSMUSG00000070942	Il1rl2	TRUE	TRUE	high_confidence	chr2	102258686	102259016	chr2_102258686_102259016|chr2_102257500_102257658|chr2_102258586_102259175	Conserved	chr2	102258617	102259053
chr1	40386181	40386582	ENSMUSG00000070942	Il1rl2	TRUE	TRUE	high_confidence	chr2	102257500	102257658	chr2_102258686_102259016|chr2_102257500_102257658|chr2_102258586_102259175	Conserved	chr2	102258617	102259053
chr1	40386181	40386582	ENSMUSG00000070942	Il1rl2	TRUE	TRUE	high_confidence	chr2	102258586	102259175	chr2_102258686_102259016|chr2_102257500_102257658|chr2_102258586_102259175	Conserved	chr2	102258617	102259053
chr1	40393285	40393555	ENSMUSG00000070942	Il1rl2	TRUE	TRUE	low_confidence	chr2	102264764	102264966	chr2_102264764_102264966	Conserved	chr2	102264290	102264911
chr1	40412589	40412728	ENSMUSG00000026069	Il1rl1	TRUE	FALSE	no_overlap	NA	NA	NA	NA	Other	NA	NA	NA
chr1	40465534	40465732	ENSMUSG00000026070	Il18r1	TRUE	TRUE	high_confidence	chr2	102355604	102355846	chr2_102355604_102355846|chr2_102356214_102356531|chr2_102355521_102356602	Conserved	chr2	102355642	102355844
chr1	40465534	40465732	ENSMUSG00000026070	Il18r1	TRUE	TRUE	high_confidence	chr2	102356214	102356531	chr2_102355604_102355846|chr2_102356214_102356531|chr2_102355521_102356602	Conserved	chr2	102355642	102355844
chr1	40465534	40465732	ENSMUSG00000026070	Il18r1	TRUE	TRUE	high_confidence	chr2	102355521	102356602	chr2_102355604_102355846|chr2_102356214_102356531|chr2_102355521_102356602	Conserved	chr2	102355642	102355844
chr1	40467412	40467571	ENSMUSG00000026070	Il18r1	TRUE	TRUE	low_confidence	chr2	102355521	102356602	chr2_102355521_102356602	Conserved	chr2	102358017	102358138
chr1	40469896	40470192	ENSMUSG00000026070	Il18r1	TRUE	TRUE	low_confidence	chr2	102359667	102359782	chr2_102359667_102359782	Conserved	chr2	102361155	102361512
chr1	40475778	40475953	ENSMUSG00000026070	Il18r1	TRUE	TRUE	high_confidence	chr2	102367380	102367908	chr2_102367380_102367908|chr2_102368522_102369027|chr2_102367293_102368023|chr2_102368491_102369048|chr2_102370010_102370240	Conserved	chr2	102368844	102369017
chr1	40475778	40475953	ENSMUSG00000026070	Il18r1	TRUE	TRUE	high_confidence	chr2	102368522	102369027	chr2_102367380_102367908|chr2_102368522_102369027|chr2_102367293_102368023|chr2_102368491_102369048|chr2_102370010_102370240	Conserved	chr2	102368844	102369017
chr1	40475778	40475953	ENSMUSG00000026070	Il18r1	TRUE	TRUE	high_confidence	chr2	102367293	102368023	chr2_102367380_102367908|chr2_102368522_102369027|chr2_102367293_102368023|chr2_102368491_102369048|chr2_102370010_102370240	Conserved	chr2	102368844	102369017
chr1	40475778	40475953	ENSMUSG00000026070	Il18r1	TRUE	TRUE	high_confidence	chr2	102368491	102369048	chr2_102367380_102367908|chr2_102368522_102369027|chr2_102367293_102368023|chr2_102368491_102369048|chr2_102370010_102370240	Conserved	chr2	102368844	102369017
chr1	40475778	40475953	ENSMUSG00000026070	Il18r1	TRUE	TRUE	high_confidence	chr2	102370010	102370240	chr2_102367380_102367908|chr2_102368522_102369027|chr2_102367293_102368023|chr2_102368491_102369048|chr2_102370010_102370240	Conserved	chr2	102368844	102369017
chr1	40479547	40479713	ENSMUSG00000026070	Il18r1	TRUE	TRUE	no_overlap	NA	NA	NA	NA	Conserved	chr2	102374207	102374404
chr1	40515200	40515506	ENSMUSG00000026068	Il18rap	TRUE	TRUE	high_confidence	chr2	102418384	102418708	chr2_102418384_102418708|chr2_102418371_102418813|chr2_102418818_102418906	Conserved	chr2	102418402	102418677
chr1	40515200	40515506	ENSMUSG00000026068	Il18rap	TRUE	TRUE	high_confidence	chr2	102418371	102418813	chr2_102418384_102418708|chr2_102418371_102418813|chr2_102418818_102418906	Conserved	chr2	102418402	102418677
chr1	40515200	40515506	ENSMUSG00000026068	Il18rap	TRUE	TRUE	high_confidence	chr2	102418818	102418906	chr2_102418384_102418708|chr2_102418371_102418813|chr2_102418818_102418906	Conserved	chr2	102418402	102418677
chr1	40515633	40515716	ENSMUSG00000026068	Il18rap	TRUE	TRUE	high_confidence	chr2	102418384	102418708	chr2_102418384_102418708|chr2_102418371_102418813|chr2_102418818_102418906	Conserved	chr2	102418798	102418877
chr1	40515633	40515716	ENSMUSG00000026068	Il18rap	TRUE	TRUE	high_confidence	chr2	102418371	102418813	chr2_102418384_102418708|chr2_102418371_102418813|chr2_102418818_102418906	Conserved	chr2	102418798	102418877
chr1	40515633	40515716	ENSMUSG00000026068	Il18rap	TRUE	TRUE	high_confidence	chr2	102418818	102418906	chr2_102418384_102418708|chr2_102418371_102418813|chr2_102418818_102418906	Conserved	chr2	102418798	102418877
chr1	40585602	40585767	ENSMUSG00000026065	Slc9a4	TRUE	TRUE	no_overlap	NA	NA	NA	NA	Other	chr2	102480783	102480790
chr1	40586953	40587075	ENSMUSG00000026065	Slc9a4	TRUE	TRUE	no_overlap	NA	NA	NA	NA	Other	chr2	102483350	102483483
chr1	40683053	40683124	ENSMUSG00000026062	Slc9a2	TRUE	TRUE	no_overlap	NA	NA	NA	NA	Other	chr2	102621790	102621864
chr1	40847619	40847856	ENSMUSG00000079588	Tmem182	TRUE	TRUE	no_overlap	NA	NA	NA	NA	Other	chr2	102809241	102809473
chr1	43168713	43168888	ENSMUSG00000008136	Fhl2	TRUE	TRUE	no_overlap	NA	NA	NA	NA	Other	chr2	105404203	105404378
chr1	43207234	43207499	ENSMUSG00000008136	Fhl2	TRUE	FALSE	no_overlap	NA	NA	NA	NA	Other	NA	NA	NA
chr1	43224294	43224455	ENSMUSG00000008136	Fhl2	TRUE	TRUE	no_overlap	NA	NA	NA	NA	Other	chr2	105472241	105472413
chr1	43360445	43360554	ENSMUSG00000066877	Nck2	TRUE	TRUE	no_overlap	NA	NA	NA	NA	Alternate	chr2	105643542	105643647
chr1	43361444	43361615	ENSMUSG00000066877	Nck2	TRUE	TRUE	no_overlap	NA	NA	NA	NA	Alternate	chr2	105644595	105644794
chr1	43467716	43467919	ENSMUSG00000066877	Nck2	TRUE	TRUE	no_overlap	NA	NA	NA	NA	Alternate	chr2	105767594	105767786
chr1	43500252	43500424	ENSMUSG00000066877	Nck2	TRUE	TRUE	low_confidence	chr2	105800510	105800633	chr2_105800510_105800633	Alternate	NA	NA	NA
chr1	43520329	43520497	ENSMUSG00000066877	Nck2	TRUE	TRUE	no_overlap	NA	NA	NA	NA	Alternate	chr2	105825789	105825927
chr1	43537106	43537286	ENSMUSG00000066877	Nck2	TRUE	TRUE	low_confidence	chr2	105859112	105859316	chr2_105859112_105859316	Alternate	chr2	105858482	105858574
chr1	43537927	43538056	ENSMUSG00000066877	Nck2	TRUE	TRUE	low_confidence	chr2	105859112	105859316	chr2_105859112_105859316	Alternate	NA	NA	NA
chr1	43539776	43539938	ENSMUSG00000066877	Nck2	TRUE	TRUE	no_overlap	NA	NA	NA	NA	Alternate	chr2	105863077	105863164
chr1	43540213	43540256	ENSMUSG00000066877	Nck2	TRUE	TRUE	no_overlap	NA	NA	NA	NA	Alternate	chr2	105863441	105863468
chr1	43562421	43562572	ENSMUSG00000066877	Nck2	TRUE	FALSE	no_overlap	NA	NA	NA	NA	Alternate	NA	NA	NA
chr1	43766416	43766651	ENSMUSG00000057363	Uxs1	TRUE	TRUE	no_overlap	NA	NA	NA	NA	Alternate	chr2	106115382	106115613
chr1	43767947	43768129	ENSMUSG00000057363	Uxs1	TRUE	TRUE	no_overlap	NA	NA	NA	NA	Alternate	chr2	106117707	106117928
chr1	43819183	43819358	ENSMUSG00000057363	Uxs1	TRUE	TRUE	no_overlap	NA	NA	NA	NA	Alternate	chr2	106184341	106184527
chr1	43843504	43843768	ENSMUSG00000057363	Uxs1	TRUE	FALSE	no_overlap	NA	NA	NA	NA	Alternate	NA	NA	NA
chr1	43845895	43846007	ENSMUSG00000057363	Uxs1	TRUE	TRUE	no_overlap	NA	NA	NA	NA	Alternate	NA	NA	NA
chr1	43897264	43897480	ENSMUSG00000041763	Tpp2	TRUE	TRUE	low_confidence	chr2	24971969	24972237	chr2_24971969_24972237|chr2_24971580_24971909	Conserved	NA	NA	NA
chr1	43897264	43897480	ENSMUSG00000041763	Tpp2	TRUE	TRUE	low_confidence	chr2	24971580	24971909	chr2_24971969_24972237|chr2_24971580_24971909	Conserved	NA	NA	NA
chr1	43933520	43933740	ENSMUSG00000041763	Tpp2	TRUE	TRUE	high_confidence	chr13	102596262	102596403	chr13_102596262_102596403|chr13_102596956_102597053|chr13_102596181_102596516|chr13_102596770_102597095	Conserved	chr13	102596241	102596578
chr1	43933520	43933740	ENSMUSG00000041763	Tpp2	TRUE	TRUE	high_confidence	chr13	102596956	102597053	chr13_102596262_102596403|chr13_102596956_102597053|chr13_102596181_102596516|chr13_102596770_102597095	Conserved	chr13	102596241	102596578
chr1	43933520	43933740	ENSMUSG00000041763	Tpp2	TRUE	TRUE	high_confidence	chr13	102596181	102596516	chr13_102596262_102596403|chr13_102596956_102597053|chr13_102596181_102596516|chr13_102596770_102597095	Conserved	chr13	102596241	102596578
chr1	43933520	43933740	ENSMUSG00000041763	Tpp2	TRUE	TRUE	high_confidence	chr13	102596770	102597095	chr13_102596262_102596403|chr13_102596956_102597053|chr13_102596181_102596516|chr13_102596770_102597095	Conserved	chr13	102596241	102596578
chr1	44951182	44951291	ENSMUSG00000056870	Gulp1	TRUE	TRUE	no_overlap	NA	NA	NA	NA	Other	NA	NA	NA
chr1	46864257	46864506	ENSMUSG00000025986	Slc39a10	TRUE	TRUE	no_overlap	NA	NA	NA	NA	Alternate	NA	NA	NA
chr1	46894610	46894761	ENSMUSG00000025986	Slc39a10	TRUE	TRUE	no_overlap	NA	NA	NA	NA	Alternate	NA	NA	NA
chr1	51243376	51243493	ENSMUSG00000045954	Cavin2	TRUE	TRUE	no_overlap	NA	NA	NA	NA	Other	chr2	191885903	191886020
chr1	51448721	51449077	ENSMUSG00000026107	Nabp1	TRUE	TRUE	no_overlap	NA	NA	NA	NA	Conserved	NA	NA	NA
chr1	51505828	51505937	ENSMUSG00000026107	Nabp1	TRUE	TRUE	no_overlap	NA	NA	NA	NA	Conserved	chr2	191646622	191646688
chr1	51509112	51509348	ENSMUSG00000026107	Nabp1	TRUE	TRUE	low_confidence	chr2	191642681	191642784	chr2_191642681_191642784	Conserved	chr2	191641852	191642093
chr1	51513189	51513309	ENSMUSG00000026107	Nabp1	TRUE	TRUE	low_confidence	chr2	191637522	191638002	chr2_191637522_191638002	Conserved	chr2	191638519	191638629
chr1	51514551	51514730	ENSMUSG00000026107	Nabp1	TRUE	TRUE	high_confidence	chr2	191637567	191637657	chr2_191637567_191637657|chr2_191637522_191638002|chr2_191635277_191635622	Conserved	chr2	191637581	191637799
chr1	51514551	51514730	ENSMUSG00000026107	Nabp1	TRUE	TRUE	high_confidence	chr2	191637522	191638002	chr2_191637567_191637657|chr2_191637522_191638002|chr2_191635277_191635622	Conserved	chr2	191637581	191637799
chr1	51514551	51514730	ENSMUSG00000026107	Nabp1	TRUE	TRUE	high_confidence	chr2	191635277	191635622	chr2_191637567_191637657|chr2_191637522_191638002|chr2_191635277_191635622	Conserved	chr2	191637581	191637799
chr1	51532365	51532578	ENSMUSG00000026107	Nabp1	TRUE	TRUE	no_overlap	NA	NA	NA	NA	Conserved	NA	NA	NA
chr1	51584882	51585267	ENSMUSG00000026107	Nabp1	TRUE	TRUE	no_overlap	NA	NA	NA	NA	Conserved	NA	NA	NA
chr1	51593930	51594223	ENSMUSG00000026107	Nabp1	TRUE	TRUE	high_confidence	chr2	191570378	191570546	chr2_191570378_191570546|chr2_191571472_191571595|chr2_191571187_191571419|chr2_191570330_191570629	Conserved	chr2	191569866	191570460
chr1	51593930	51594223	ENSMUSG00000026107	Nabp1	TRUE	TRUE	high_confidence	chr2	191571472	191571595	chr2_191570378_191570546|chr2_191571472_191571595|chr2_191571187_191571419|chr2_191570330_191570629	Conserved	chr2	191569866	191570460
chr1	51593930	51594223	ENSMUSG00000026107	Nabp1	TRUE	TRUE	high_confidence	chr2	191571187	191571419	chr2_191570378_191570546|chr2_191571472_191571595|chr2_191571187_191571419|chr2_191570330_191570629	Conserved	chr2	191569866	191570460
chr1	51593930	51594223	ENSMUSG00000026107	Nabp1	TRUE	TRUE	high_confidence	chr2	191570330	191570629	chr2_191570378_191570546|chr2_191571472_191571595|chr2_191571187_191571419|chr2_191570330_191570629	Conserved	chr2	191569866	191570460
chr1	51934605	51934810	ENSMUSG00000018417	Myo1b	TRUE	TRUE	no_overlap	NA	NA	NA	NA	Other	chr2	191228427	191228798
chr1	52011425	52011531	ENSMUSG00000062939	Stat4	TRUE	TRUE	high_confidence	chr2	191148892	191149023	chr2_191148892_191149023|chr2_191148843_191149071|chr2_191148401_191148535	Conserved	chr2	191148364	191148478
chr1	52011425	52011531	ENSMUSG00000062939	Stat4	TRUE	TRUE	high_confidence	chr2	191148843	191149071	chr2_191148892_191149023|chr2_191148843_191149071|chr2_191148401_191148535	Conserved	chr2	191148364	191148478
chr1	52011425	52011531	ENSMUSG00000062939	Stat4	TRUE	TRUE	high_confidence	chr2	191148401	191148535	chr2_191148892_191149023|chr2_191148843_191149071|chr2_191148401_191148535	Conserved	chr2	191148364	191148478
chr1	52019738	52020087	ENSMUSG00000062939	Stat4	TRUE	TRUE	high_confidence	chr2	191128278	191128464	chr2_191128278_191128464|chr2_191128168_191128490	Conserved	chr2	191128467	191128904
chr1	52019738	52020087	ENSMUSG00000062939	Stat4	TRUE	TRUE	high_confidence	chr2	191128168	191128490	chr2_191128278_191128464|chr2_191128168_191128490	Conserved	chr2	191128467	191128904
chr1	52020152	52020156	ENSMUSG00000062939	Stat4	TRUE	TRUE	high_confidence	chr2	191128278	191128464	chr2_191128278_191128464|chr2_191128168_191128490	Conserved	chr2	191128399	191128403
chr1	52020152	52020156	ENSMUSG00000062939	Stat4	TRUE	TRUE	high_confidence	chr2	191128168	191128490	chr2_191128278_191128464|chr2_191128168_191128490	Conserved	chr2	191128399	191128403
chr1	52034936	52035218	ENSMUSG00000062939	Stat4	TRUE	TRUE	high_confidence	chr2	191114451	191114653	chr2_191114451_191114653|chr2_191115373_191115712|chr2_191114424_191114906|chr2_191113913_191114044	Conserved	chr2	191114390	191114692
chr1	52034936	52035218	ENSMUSG00000062939	Stat4	TRUE	TRUE	high_confidence	chr2	191115373	191115712	chr2_191114451_191114653|chr2_191115373_191115712|chr2_191114424_191114906|chr2_191113913_191114044	Conserved	chr2	191114390	191114692
chr1	52034936	52035218	ENSMUSG00000062939	Stat4	TRUE	TRUE	high_confidence	chr2	191114424	191114906	chr2_191114451_191114653|chr2_191115373_191115712|chr2_191114424_191114906|chr2_191113913_191114044	Conserved	chr2	191114390	191114692
chr1	52034936	52035218	ENSMUSG00000062939	Stat4	TRUE	TRUE	high_confidence	chr2	191113913	191114044	chr2_191114451_191114653|chr2_191115373_191115712|chr2_191114424_191114906|chr2_191113913_191114044	Conserved	chr2	191114390	191114692
chr1	52039282	52039482	ENSMUSG00000062939	Stat4	TRUE	TRUE	no_overlap	NA	NA	NA	NA	Conserved	chr2	191109994	191110198
chr1	52113702	52113963	ENSMUSG00000026104	Stat1	TRUE	TRUE	high_confidence	chr2	191020239	191020603	chr2_191020239_191020603|chr2_191021037_191021131|chr2_191020147_191020771	Conserved	chr2	191020308	191020668
chr1	52113702	52113963	ENSMUSG00000026104	Stat1	TRUE	TRUE	high_confidence	chr2	191021037	191021131	chr2_191020239_191020603|chr2_191021037_191021131|chr2_191020147_191020771	Conserved	chr2	191020308	191020668
chr1	52113702	52113963	ENSMUSG00000026104	Stat1	TRUE	TRUE	high_confidence	chr2	191020147	191020771	chr2_191020239_191020603|chr2_191021037_191021131|chr2_191020147_191020771	Conserved	chr2	191020308	191020668
chr1	52119253	52119386	ENSMUSG00000026104	Stat1	TRUE	TRUE	high_confidence	chr2	191014841	191014904	chr2_191014841_191014904|chr2_191014087_191014425|chr2_191014785_191015079|chr2_191013552_191014718	Conserved	chr2	191014281	191014448
chr1	52119253	52119386	ENSMUSG00000026104	Stat1	TRUE	TRUE	high_confidence	chr2	191014087	191014425	chr2_191014841_191014904|chr2_191014087_191014425|chr2_191014785_191015079|chr2_191013552_191014718	Conserved	chr2	191014281	191014448
chr1	52119253	52119386	ENSMUSG00000026104	Stat1	TRUE	TRUE	high_confidence	chr2	191014785	191015079	chr2_191014841_191014904|chr2_191014087_191014425|chr2_191014785_191015079|chr2_191013552_191014718	Conserved	chr2	191014281	191014448
chr1	52119253	52119386	ENSMUSG00000026104	Stat1	TRUE	TRUE	high_confidence	chr2	191013552	191014718	chr2_191014841_191014904|chr2_191014087_191014425|chr2_191014785_191015079|chr2_191013552_191014718	Conserved	chr2	191014281	191014448
chr1	52143876	52144008	ENSMUSG00000026104	Stat1	TRUE	TRUE	no_overlap	NA	NA	NA	NA	Conserved	chr2	190987157	190987175
chr1	52144923	52145129	ENSMUSG00000026104	Stat1	TRUE	TRUE	no_overlap	NA	NA	NA	NA	Conserved	chr2	190985689	190985948
chr1	52363715	52363871	ENSMUSG00000002881	Nab1	TRUE	TRUE	low_confidence	chr2	190764269	190764449	chr2_190764269_190764449	Other	chr2	190764300	190764447
chr1	52366479	52366604	ENSMUSG00000002881	Nab1	TRUE	TRUE	no_overlap	NA	NA	NA	NA	Other	chr2	190760043	190762090
chr1	52374823	52375021	ENSMUSG00000002881	Nab1	TRUE	FALSE	no_overlap	NA	NA	NA	NA	Other	NA	NA	NA
chr1	52388189	52388474	ENSMUSG00000002881	Nab1	TRUE	TRUE	low_confidence	chr2	190744227	190744315	chr2_190744227_190744315	Other	chr2	190744094	190744350
chr1	52388990	52389093	ENSMUSG00000002881	Nab1	TRUE	TRUE	low_confidence	chr2	190744227	190744315	chr2_190744227_190744315	Other	chr2	190743553	190743639
chr1	52578253	52578445	ENSMUSG00000043015	Nemp2	TRUE	TRUE	high_confidence	chr2	190578621	190578749	chr2_190578621_190578749|chr2_190578582_190578777	Conserved	chr2	190578606	190578789
chr1	52578253	52578445	ENSMUSG00000043015	Nemp2	TRUE	TRUE	high_confidence	chr2	190578582	190578777	chr2_190578621_190578749|chr2_190578582_190578777	Conserved	chr2	190578606	190578789
chr1	52597894	52598136	ENSMUSG00000043015	Nemp2	TRUE	TRUE	low_confidence	chr2	190563220	190563316	chr2_190563220_190563316	Conserved	chr2	190563112	190563399
chr1	52630615	52630718	ENSMUSG00000043015	Nemp2	TRUE	TRUE	high_confidence	chr2	190534757	190534847	chr2_190534757_190534847|chr2_190534637_190534642|chr2_190534396_190534570|chr2_190534315_190535076|chr2_190533861_190534116	Conserved	chr2	190534737	190534799
chr1	52630615	52630718	ENSMUSG00000043015	Nemp2	TRUE	TRUE	high_confidence	chr2	190534637	190534642	chr2_190534757_190534847|chr2_190534637_190534642|chr2_190534396_190534570|chr2_190534315_190535076|chr2_190533861_190534116	Conserved	chr2	190534737	190534799
chr1	52630615	52630718	ENSMUSG00000043015	Nemp2	TRUE	TRUE	high_confidence	chr2	190534396	190534570	chr2_190534757_190534847|chr2_190534637_190534642|chr2_190534396_190534570|chr2_190534315_190535076|chr2_190533861_190534116	Conserved	chr2	190534737	190534799
chr1	52630615	52630718	ENSMUSG00000043015	Nemp2	TRUE	TRUE	high_confidence	chr2	190534315	190535076	chr2_190534757_190534847|chr2_190534637_190534642|chr2_190534396_190534570|chr2_190534315_190535076|chr2_190533861_190534116	Conserved	chr2	190534737	190534799
chr1	52630615	52630718	ENSMUSG00000043015	Nemp2	TRUE	TRUE	high_confidence	chr2	190533861	190534116	chr2_190534757_190534847|chr2_190534637_190534642|chr2_190534396_190534570|chr2_190534315_190535076|chr2_190533861_190534116	Conserved	chr2	190534737	190534799
chr1	52640790	52640947	ENSMUSG00000043015	Nemp2	TRUE	TRUE	no_overlap	NA	NA	NA	NA	Conserved	chr2	190519065	190519220
chr1	52652685	52652799	ENSMUSG00000043015	Nemp2	TRUE	TRUE	no_overlap	NA	NA	NA	NA	Conserved	chr2	190506087	190506236
chr1	52653433	52653639	ENSMUSG00000043015	Nemp2	TRUE	TRUE	no_overlap	NA	NA	NA	NA	Conserved	chr2	190503425	190503585
chr1	52753894	52754025	ENSMUSG00000041439	Mfsd6	TRUE	TRUE	no_overlap	NA	NA	NA	NA	Other	NA	NA	NA
chr1	52799511	52799706	ENSMUSG00000026102	Inpp1	TRUE	TRUE	low_confidence	chr2	190359919	190360007	chr2_190359919_190360007	Other	chr2	190359864	190360078
chr1	52800448	52800650	ENSMUSG00000026102	Inpp1	TRUE	TRUE	low_confidence	chr2	190359919	190360007	chr2_190359919_190360007	Other	NA	NA	NA
chr1	52802540	52802686	ENSMUSG00000026102	Inpp1	TRUE	TRUE	no_overlap	NA	NA	NA	NA	Other	NA	NA	NA
chr1	53761818	53761927	ENSMUSG00000026094	Stk17b	TRUE	TRUE	no_overlap	NA	NA	NA	NA	Conserved	chr2	196140564	196140723
chr1	53774037	53774262	ENSMUSG00000026094	Stk17b	TRUE	TRUE	high_confidence	chr2	196160159	196160411	chr2_196160159_196160411|chr2_196160111_196160435	Conserved	chr2	196160155	196160397
chr1	53774037	53774262	ENSMUSG00000026094	Stk17b	TRUE	TRUE	high_confidence	chr2	196160111	196160435	chr2_196160159_196160411|chr2_196160111_196160435	Conserved	chr2	196160155	196160397
chr1	53791458	53791632	ENSMUSG00000026094	Stk17b	TRUE	TRUE	high_confidence	chr2	196176119	196176630	chr2_196176119_196176630|chr2_196176079_196176648	Conserved	chr2	196176192	196176362
chr1	53791458	53791632	ENSMUSG00000026094	Stk17b	TRUE	TRUE	high_confidence	chr2	196176079	196176648	chr2_196176119_196176630|chr2_196176079_196176648	Conserved	chr2	196176192	196176362
chr1	53797918	53798102	ENSMUSG00000042807	Hecw2	TRUE	TRUE	high_confidence	chr2	196182430	196182555	chr2_196182430_196182555|chr2_196182371_196182587|chr2_196183651_196183898|chr2_196183953_196184134	Conserved	chr2	196183144	196183346
chr1	53797918	53798102	ENSMUSG00000042807	Hecw2	TRUE	TRUE	high_confidence	chr2	196182371	196182587	chr2_196182430_196182555|chr2_196182371_196182587|chr2_196183651_196183898|chr2_196183953_196184134	Conserved	chr2	196183144	196183346
chr1	53797918	53798102	ENSMUSG00000042807	Hecw2	TRUE	TRUE	high_confidence	chr2	196183651	196183898	chr2_196182430_196182555|chr2_196182371_196182587|chr2_196183651_196183898|chr2_196183953_196184134	Conserved	chr2	196183144	196183346
chr1	53797918	53798102	ENSMUSG00000042807	Hecw2	TRUE	TRUE	high_confidence	chr2	196183953	196184134	chr2_196182430_196182555|chr2_196182371_196182587|chr2_196183651_196183898|chr2_196183953_196184134	Conserved	chr2	196183144	196183346
chr1	53838246	53838408	ENSMUSG00000042807	Hecw2	TRUE	TRUE	no_overlap	NA	NA	NA	NA	Conserved	chr2	196224982	196225149
chr1	53838613	53838778	ENSMUSG00000042807	Hecw2	TRUE	TRUE	no_overlap	NA	NA	NA	NA	Conserved	chr2	196225346	196225513
chr1	53845048	53845168	ENSMUSG00000042807	Hecw2	TRUE	TRUE	no_overlap	NA	NA	NA	NA	Conserved	NA	NA	NA
chr1	53845359	53845582	ENSMUSG00000042807	Hecw2	TRUE	TRUE	low_confidence	chr2	196233474	196233601	chr2_196233474_196233601	Conserved	chr2	196232533	196232771
chr1	53851423	53851544	ENSMUSG00000042807	Hecw2	TRUE	TRUE	high_confidence	chr2	196240288	196240521	chr2_196240288_196240521|chr2_196240229_196240548	Conserved	chr2	196240288	196240420
chr1	53851423	53851544	ENSMUSG00000042807	Hecw2	TRUE	TRUE	high_confidence	chr2	196240229	196240548	chr2_196240288_196240521|chr2_196240229_196240548	Conserved	chr2	196240288	196240420
chr1	54279804	54279907	ENSMUSG00000025983	Ccdc150	TRUE	TRUE	no_overlap	NA	NA	NA	NA	Other	chr2	196667753	196667840
chr1	54647441	54647594	ENSMUSG00000052331	Ankrd44	TRUE	TRUE	low_confidence	chr2	196987971	196988289	chr2_196987971_196988289|chr2_196989673_196989838	Conserved	chr2	196988784	196988943
chr1	54647441	54647594	ENSMUSG00000052331	Ankrd44	TRUE	TRUE	low_confidence	chr2	196989673	196989838	chr2_196987971_196988289|chr2_196989673_196989838	Conserved	chr2	196988784	196988943
chr1	54660759	54661003	ENSMUSG00000052331	Ankrd44	TRUE	TRUE	no_overlap	NA	NA	NA	NA	Conserved	chr2	197005454	197005696
chr1	54827980	54828151	ENSMUSG00000052331	Ankrd44	TRUE	TRUE	no_overlap	NA	NA	NA	NA	Conserved	chr2	197186387	197186457
chr1	54841837	54842113	ENSMUSG00000052331	Ankrd44	TRUE	TRUE	high_confidence	chr2	197198859	197199279	chr2_197198859_197199279|chr2_197198831_197199571	Conserved	chr2	197198926	197199237
chr1	54841837	54842113	ENSMUSG00000052331	Ankrd44	TRUE	TRUE	high_confidence	chr2	197198831	197199571	chr2_197198859_197199279|chr2_197198831_197199571	Conserved	chr2	197198926	197199237
chr1	54913559	54913609	ENSMUSG00000052331	Ankrd44	TRUE	TRUE	low_confidence	chr2	197296910	197297071	chr2_197296910_197297071	Conserved	chr2	197296261	197296347
chr1	54914541	54914651	ENSMUSG00000052331	Ankrd44	TRUE	TRUE	low_confidence	chr2	197296910	197297071	chr2_197296910_197297071|chr2_197298062_197298180	Conserved	chr2	197296905	197296994
chr1	54914541	54914651	ENSMUSG00000052331	Ankrd44	TRUE	TRUE	low_confidence	chr2	197298062	197298180	chr2_197296910_197297071|chr2_197298062_197298180	Conserved	chr2	197296905	197296994
chr1	54920351	54920454	ENSMUSG00000052331	Ankrd44	TRUE	TRUE	low_confidence	chr2	197304661	197304812	chr2_197304661_197304812	Conserved	chr2	197304695	197304827
chr1	54935030	54935166	ENSMUSG00000052331	Ankrd44	TRUE	FALSE	no_overlap	NA	NA	NA	NA	Conserved	NA	NA	NA
chr1	55130974	55131208	ENSMUSG00000025979	Mob4	TRUE	TRUE	high_confidence	chr2	197515844	197516099	chr2_197515844_197516099|chr2_197515763_197516218	Conserved	chr2	197515736	197516001
chr1	55130974	55131208	ENSMUSG00000025979	Mob4	TRUE	TRUE	high_confidence	chr2	197515763	197516218	chr2_197515844_197516099|chr2_197515763_197516218	Conserved	chr2	197515736	197516001
chr1	55428587	55428703	ENSMUSG00000038349	Plcl1	TRUE	TRUE	no_overlap	NA	NA	NA	NA	Other	chr2	197827233	197827430
chr1	55528873	55529074	ENSMUSG00000038349	Plcl1	TRUE	TRUE	low_confidence	chr2	197909919	197910062	chr2_197909919_197910062	Other	chr2	197909393	197909611
chr1	58392988	58393143	ENSMUSG00000051223	Bzw1	TRUE	TRUE	high_confidence	chr2	200811784	200812025	chr2_200811784_200812025|chr2_200811351_200812044|chr2_200812254_200812582	Conserved	chr2	200811745	200811917
chr1	58392988	58393143	ENSMUSG00000051223	Bzw1	TRUE	TRUE	high_confidence	chr2	200811351	200812044	chr2_200811784_200812025|chr2_200811351_200812044|chr2_200812254_200812582	Conserved	chr2	200811745	200811917
chr1	58392988	58393143	ENSMUSG00000051223	Bzw1	TRUE	TRUE	high_confidence	chr2	200812254	200812582	chr2_200811784_200812025|chr2_200811351_200812044|chr2_200812254_200812582	Conserved	chr2	200811745	200811917
chr1	58445394	58445583	ENSMUSG00000026036	Nif3l1	TRUE	TRUE	high_confidence	chr2	200889111	200889427	chr2_200889111_200889427|chr2_200889046_200889485|chr2_200889634_200889738	Conserved	chr2	200889202	200889342
chr1	58445394	58445583	ENSMUSG00000026036	Nif3l1	TRUE	TRUE	high_confidence	chr2	200889046	200889485	chr2_200889111_200889427|chr2_200889046_200889485|chr2_200889634_200889738	Conserved	chr2	200889202	200889342
chr1	58445394	58445583	ENSMUSG00000026036	Nif3l1	TRUE	TRUE	high_confidence	chr2	200889634	200889738	chr2_200889111_200889427|chr2_200889046_200889485|chr2_200889634_200889738	Conserved	chr2	200889202	200889342
chr1	58651763	58651940	ENSMUSG00000047528	Als2cr12	TRUE	FALSE	no_overlap	NA	NA	NA	NA	Other	NA	NA	NA
chr1	58663498	58663601	ENSMUSG00000047528	Als2cr12	TRUE	TRUE	no_overlap	NA	NA	NA	NA	Other	NA	NA	NA
chr1	58722200	58722355	ENSMUSG00000026031	Cflar	TRUE	TRUE	low_confidence	chr2	201126845	201127045	chr2_201126845_201127045	Alternate	NA	NA	NA
chr1	58742664	58742812	ENSMUSG00000026031	Cflar	TRUE	TRUE	no_overlap	NA	NA	NA	NA	Alternate	chr2	201151710	201151860
chr1	58761367	58761470	ENSMUSG00000026031	Cflar	TRUE	TRUE	low_confidence	chr2	201233292	201233595	chr2_201233292_201233595	Alternate	chr2	201233294	201233380
chr1	58856977	58857122	ENSMUSG00000026029	Casp8	TRUE	FALSE	no_overlap	NA	NA	NA	NA	Other	NA	NA	NA
chr1	58956423	58956526	ENSMUSG00000026028	Trak2	TRUE	TRUE	no_overlap	NA	NA	NA	NA	Alternate	NA	NA	NA
chr1	59162996	59163338	ENSMUSG00000026024	Als2	TRUE	TRUE	no_overlap	NA	NA	NA	NA	Other	chr2	201700619	201700962
chr1	59887048	59887140	ENSMUSG00000067336	Bmpr2	TRUE	TRUE	no_overlap	NA	NA	NA	NA	Other	chr2	202593857	202593980
chr1	60016193	60016446	ENSMUSG00000026018	Ica1l	TRUE	TRUE	no_overlap	NA	NA	NA	NA	Alternate	NA	NA	NA
chr1	60017086	60017199	ENSMUSG00000026018	Ica1l	TRUE	TRUE	no_overlap	NA	NA	NA	NA	Alternate	chr6	39958700	39958833
chr1	60410603	60410717	ENSMUSG00000026782	Abi2	TRUE	TRUE	low_confidence	chr2	203328048	203328401	chr2_203328048_203328401|chr2_203328540_203328672|chr2_203328890_203328991	Other	chr2	203329316	203329436
chr1	60410603	60410717	ENSMUSG00000026782	Abi2	TRUE	TRUE	low_confidence	chr2	203328540	203328672	chr2_203328048_203328401|chr2_203328540_203328672|chr2_203328890_203328991	Other	chr2	203329316	203329436
chr1	60410603	60410717	ENSMUSG00000026782	Abi2	TRUE	TRUE	low_confidence	chr2	203328890	203328991	chr2_203328048_203328401|chr2_203328540_203328672|chr2_203328890_203328991	Other	chr2	203329316	203329436
chr1	60530781	60530939	ENSMUSG00000026014	Raph1	TRUE	TRUE	low_confidence	chr2	203493073	203493270	chr2_203493073_203493270	Other	NA	NA	NA
chr1	60624246	60624352	ENSMUSG00000026014	Raph1	TRUE	TRUE	no_overlap	NA	NA	NA	NA	Other	NA	NA	NA
chr1	60677387	60677686	ENSMUSG00000026012	Cd28	TRUE	FALSE	no_overlap	NA	NA	NA	NA	Conserved	NA	NA	NA
chr1	60744429	60744564	ENSMUSG00000026012	Cd28	TRUE	TRUE	low_confidence	chr2	203705191	203705383	chr2_203705191_203705383	Conserved	NA	NA	NA
chr1	60746126	60746517	ENSMUSG00000026012	Cd28	TRUE	TRUE	high_confidence	chr2	203706440	203706701	chr2_203706440_203706701|chr2_203705191_203705383|chr2_203705388_203705602|chr2_203706345_203706775	Conserved	chr2	203706350	203706737
chr1	60746126	60746517	ENSMUSG00000026012	Cd28	TRUE	TRUE	high_confidence	chr2	203705191	203705383	chr2_203706440_203706701|chr2_203705191_203705383|chr2_203705388_203705602|chr2_203706345_203706775	Conserved	chr2	203706350	203706737
chr1	60746126	60746517	ENSMUSG00000026012	Cd28	TRUE	TRUE	high_confidence	chr2	203705388	203705602	chr2_203706440_203706701|chr2_203705191_203705383|chr2_203705388_203705602|chr2_203706345_203706775	Conserved	chr2	203706350	203706737
chr1	60746126	60746517	ENSMUSG00000026012	Cd28	TRUE	TRUE	high_confidence	chr2	203706345	203706775	chr2_203706440_203706701|chr2_203705191_203705383|chr2_203705388_203705602|chr2_203706345_203706775	Conserved	chr2	203706350	203706737
chr1	60771865	60772039	ENSMUSG00000026012	Cd28	TRUE	TRUE	low_confidence	chr2	203737517	203737641	chr2_203737517_203737641	Conserved	chr2	203737483	203737665
chr1	60777014	60777232	ENSMUSG00000026012	Cd28	TRUE	TRUE	high_confidence	chr2	203741091	203741365	chr2_203741091_203741365|chr2_203740974_203741430|chr2_203741663_203741924	Conserved	chr2	203741046	203741267
chr1	60777014	60777232	ENSMUSG00000026012	Cd28	TRUE	TRUE	high_confidence	chr2	203740974	203741430	chr2_203741091_203741365|chr2_203740974_203741430|chr2_203741663_203741924	Conserved	chr2	203741046	203741267
chr1	60777014	60777232	ENSMUSG00000026012	Cd28	TRUE	TRUE	high_confidence	chr2	203741663	203741924	chr2_203741091_203741365|chr2_203740974_203741430|chr2_203741663_203741924	Conserved	chr2	203741046	203741267
chr1	60805614	60805791	ENSMUSG00000026012	Cd28	TRUE	TRUE	low_confidence	chr2	203763449	203763893	chr2_203763449_203763893|chr2_203763962_203764216	Conserved	chr2	203763958	203764112
chr1	60805614	60805791	ENSMUSG00000026012	Cd28	TRUE	TRUE	low_confidence	chr2	203763962	203764216	chr2_203763449_203763893|chr2_203763962_203764216	Conserved	chr2	203763958	203764112
chr1	60828278	60828469	ENSMUSG00000026012	Cd28	TRUE	TRUE	no_overlap	NA	NA	NA	NA	Conserved	NA	NA	NA
chr1	60833750	60833984	ENSMUSG00000026012	Cd28	TRUE	FALSE	no_overlap	NA	NA	NA	NA	Conserved	NA	NA	NA
chr1	60859989	60860126	ENSMUSG00000026011	Ctla4	TRUE	TRUE	low_confidence	chr2	203815383	203815625	chr2_203815383_203815625	Conserved	chr2	203814149	203814190
chr1	60875388	60875595	ENSMUSG00000026011	Ctla4	TRUE	TRUE	low_confidence	chr2	203830323	203830658	chr2_203830323_203830658|chr2_203830818_203831012	Conserved	chr2	203830429	203830631
chr1	60875388	60875595	ENSMUSG00000026011	Ctla4	TRUE	TRUE	low_confidence	chr2	203830818	203831012	chr2_203830323_203830658|chr2_203830818_203831012	Conserved	chr2	203830429	203830631
chr1	60908823	60909041	ENSMUSG00000026011	Ctla4	TRUE	TRUE	high_confidence	chr2	203867669	203867764	chr2_203867669_203867764|chr2_203867583_203867997	Conserved	chr2	203867601	203867813
chr1	60908823	60909041	ENSMUSG00000026011	Ctla4	TRUE	TRUE	high_confidence	chr2	203867583	203867997	chr2_203867669_203867764|chr2_203867583_203867997	Conserved	chr2	203867601	203867813
chr1	60913442	60913614	ENSMUSG00000026011	Ctla4	TRUE	TRUE	low_confidence	chr2	203871057	203871331	chr2_203871057_203871331|chr2_203871447_203871905	Conserved	chr2	203871621	203871794
chr1	60913442	60913614	ENSMUSG00000026011	Ctla4	TRUE	TRUE	low_confidence	chr2	203871447	203871905	chr2_203871057_203871331|chr2_203871447_203871905	Conserved	chr2	203871621	203871794
chr1	60920519	60920778	ENSMUSG00000026011	Ctla4	TRUE	TRUE	no_overlap	NA	NA	NA	NA	Conserved	chr2	203878144	203878464
chr1	60940144	60940264	ENSMUSG00000026011	Ctla4	TRUE	TRUE	low_confidence	chr2	203894248	203894576	chr2_203894248_203894576	Conserved	NA	NA	NA
chr1	60975156	60975314	ENSMUSG00000026009	Icos	TRUE	TRUE	low_confidence	chr2	203934053	203934672	chr2_203934053_203934672	Other	NA	NA	NA
chr1	60977721	60977994	ENSMUSG00000026009	Icos	TRUE	TRUE	low_confidence	chr2	203936594	203936877	chr2_203936594_203936877	Other	chr2	203936609	203936850
chr1	60983109	60983273	ENSMUSG00000026009	Icos	TRUE	TRUE	low_confidence	chr2	203940805	203941078	chr2_203940805_203941078|chr2_203941799_203941908	Other	chr2	203941962	203942122
chr1	60983109	60983273	ENSMUSG00000026009	Icos	TRUE	TRUE	low_confidence	chr2	203941799	203941908	chr2_203940805_203941078|chr2_203941799_203941908	Other	chr2	203941962	203942122
chr1	60990331	60990502	ENSMUSG00000026009	Icos	TRUE	TRUE	low_confidence	chr2	203951469	203951912	chr2_203951469_203951912	Other	chr2	203951703	203951871
chr1	60990649	60990757	ENSMUSG00000026009	Icos	TRUE	TRUE	low_confidence	chr2	203951469	203951912	chr2_203951469_203951912	Other	chr2	203952032	203952135
chr1	61022904	61023251	ENSMUSG00000026009	Icos	TRUE	TRUE	low_confidence	chr2	203992500	203992677	chr2_203992500_203992677|chr2_203993665_203993857	Other	chr2	203992534	203992880
chr1	61022904	61023251	ENSMUSG00000026009	Icos	TRUE	TRUE	low_confidence	chr2	203993665	203993857	chr2_203992500_203992677|chr2_203993665_203993857	Other	chr2	203992534	203992880
chr1	61026810	61026969	ENSMUSG00000026009	Icos	TRUE	TRUE	low_confidence	chr2	203997522	203997763	chr2_203997522_203997763|chr2_203998326_203998740	Other	chr2	203997636	203997794
chr1	61026810	61026969	ENSMUSG00000026009	Icos	TRUE	TRUE	low_confidence	chr2	203998326	203998740	chr2_203997522_203997763|chr2_203998326_203998740	Other	chr2	203997636	203997794
chr1	61039400	61039603	ENSMUSG00000026009	Icos	TRUE	TRUE	low_confidence	chr2	204006362	204006657	chr2_204006362_204006657	Other	chr2	204007790	204008039
chr1	61045917	61046085	ENSMUSG00000026009	Icos	TRUE	TRUE	low_confidence	chr2	204015095	204015436	chr2_204015095_204015436|chr2_204015479_204015850	Other	chr2	204015727	204015823
chr1	61045917	61046085	ENSMUSG00000026009	Icos	TRUE	TRUE	low_confidence	chr2	204015479	204015850	chr2_204015095_204015436|chr2_204015479_204015850	Other	chr2	204015727	204015823
chr1	61046454	61046637	ENSMUSG00000026009	Icos	TRUE	TRUE	low_confidence	chr2	204015095	204015436	chr2_204015095_204015436|chr2_204015479_204015850	Other	chr2	204016221	204016415
chr1	61046454	61046637	ENSMUSG00000026009	Icos	TRUE	TRUE	low_confidence	chr2	204015479	204015850	chr2_204015095_204015436|chr2_204015479_204015850	Other	chr2	204016221	204016415
chr1	61050426	61050673	ENSMUSG00000026009	Icos	TRUE	TRUE	low_confidence	chr2	204019620	204019955	chr2_204019620_204019955	Other	chr2	204019666	204019904
chr1	61054479	61054725	ENSMUSG00000026009	Icos	TRUE	TRUE	low_confidence	chr2	204024660	204024781	chr2_204024660_204024781	Other	chr2	204022625	204022899
chr1	61137592	61137769	ENSMUSG00000026009	Icos	TRUE	TRUE	no_overlap	NA	NA	NA	NA	Other	chr2	204106421	204106616
chr1	61139782	61139939	ENSMUSG00000026009	Icos	TRUE	TRUE	low_confidence	chr2	204108354	204108613	chr2_204108354_204108613|chr2_204108894_204109356|chr2_204109695_204109791	Other	chr2	204108850	204109012
chr1	61139782	61139939	ENSMUSG00000026009	Icos	TRUE	TRUE	low_confidence	chr2	204108894	204109356	chr2_204108354_204108613|chr2_204108894_204109356|chr2_204109695_204109791	Other	chr2	204108850	204109012
chr1	61139782	61139939	ENSMUSG00000026009	Icos	TRUE	TRUE	low_confidence	chr2	204109695	204109791	chr2_204108354_204108613|chr2_204108894_204109356|chr2_204109695_204109791	Other	chr2	204108850	204109012
chr1	61203237	61203400	ENSMUSG00000026009	Icos	TRUE	TRUE	no_overlap	NA	NA	NA	NA	Other	chr2	204170315	204170476
chr1	61422025	61422173	ENSMUSG00000052062	Pard3b	TRUE	TRUE	no_overlap	NA	NA	NA	NA	Other	chr2	204372305	204372458
chr1	61423333	61423476	ENSMUSG00000052062	Pard3b	TRUE	TRUE	no_overlap	NA	NA	NA	NA	Other	chr2	204373944	204374116
chr1	62750603	62750710	ENSMUSG00000025969	Nrp2	TRUE	TRUE	no_overlap	NA	NA	NA	NA	Other	chr2	205729438	205729508
chr1	62829751	62829877	ENSMUSG00000025969	Nrp2	TRUE	TRUE	no_overlap	NA	NA	NA	NA	Other	chr2	205808471	205808595
chr1	63114577	63114733	ENSMUSG00000040865	Ino80d	TRUE	TRUE	high_confidence	chr2	206085835	206085940	chr2_206085835_206085940|chr2_206085144_206085260|chr2_206085740_206086075|chr2_206086124_206086308	Conserved	chr2	206086091	206086248
chr1	63114577	63114733	ENSMUSG00000040865	Ino80d	TRUE	TRUE	high_confidence	chr2	206085144	206085260	chr2_206085835_206085940|chr2_206085144_206085260|chr2_206085740_206086075|chr2_206086124_206086308	Conserved	chr2	206086091	206086248
chr1	63114577	63114733	ENSMUSG00000040865	Ino80d	TRUE	TRUE	high_confidence	chr2	206085740	206086075	chr2_206085835_206085940|chr2_206085144_206085260|chr2_206085740_206086075|chr2_206086124_206086308	Conserved	chr2	206086091	206086248
chr1	63114577	63114733	ENSMUSG00000040865	Ino80d	TRUE	TRUE	high_confidence	chr2	206086124	206086308	chr2_206085835_206085940|chr2_206085144_206085260|chr2_206085740_206086075|chr2_206086124_206086308	Conserved	chr2	206086091	206086248
chr1	64000796	64000992	ENSMUSG00000025959	Klf7	TRUE	TRUE	low_confidence	chr2	207046935	207047133	chr2_207046935_207047133	Alternate	chr2	207046883	207047095
chr1	64005327	64005424	ENSMUSG00000025959	Klf7	TRUE	TRUE	no_overlap	NA	NA	NA	NA	Alternate	chr2	207051509	207051605
chr1	64091550	64091747	ENSMUSG00000025959	Klf7	TRUE	TRUE	no_overlap	NA	NA	NA	NA	Alternate	chr2	207137856	207138054
chr1	64101471	64101574	ENSMUSG00000025959	Klf7	TRUE	TRUE	no_overlap	NA	NA	NA	NA	Alternate	chr2	207147587	207147712
chr1	64102381	64102537	ENSMUSG00000025959	Klf7	TRUE	TRUE	no_overlap	NA	NA	NA	NA	Alternate	NA	NA	NA
chr1	64105397	64105577	ENSMUSG00000025959	Klf7	TRUE	TRUE	low_confidence	chr2	207149918	207150165	chr2_207149918_207150165	Alternate	chr2	207149882	207150068
chr1	64133348	64133464	ENSMUSG00000025959	Klf7	TRUE	TRUE	no_overlap	NA	NA	NA	NA	Alternate	NA	NA	NA
chr1	64136392	64136459	ENSMUSG00000025959	Klf7	TRUE	TRUE	no_overlap	NA	NA	NA	NA	Alternate	NA	NA	NA
chr1	64193199	64193335	ENSMUSG00000025959	Klf7	TRUE	TRUE	low_confidence	chr2	207224804	207225000	chr2_207224804_207225000|chr2_207225892_207226085	Alternate	chr2	207224807	207224966
chr1	64193199	64193335	ENSMUSG00000025959	Klf7	TRUE	TRUE	low_confidence	chr2	207225892	207226085	chr2_207224804_207225000|chr2_207225892_207226085	Alternate	chr2	207224807	207224966
chr1	64197811	64197940	ENSMUSG00000025959	Klf7	TRUE	TRUE	no_overlap	NA	NA	NA	NA	Alternate	chr2	207229079	207229113
chr1	64226214	64226394	ENSMUSG00000025959	Klf7	TRUE	TRUE	no_overlap	NA	NA	NA	NA	Alternate	chr2	207258707	207258889
chr1	64301156	64301405	ENSMUSG00000025959	Klf7	TRUE	TRUE	low_confidence	chr2	207330902	207331215	chr2_207330902_207331215	Alternate	chr2	207330842	207331124
chr1	64305604	64305857	ENSMUSG00000025959	Klf7	TRUE	TRUE	low_confidence	chr2	207334679	207334774	chr2_207334679_207334774	Alternate	chr2	207334824	207335073
chr1	64407437	64407556	ENSMUSG00000025958	Creb1	TRUE	TRUE	no_overlap	NA	NA	NA	NA	Conserved	chr2	207433797	207433920
chr1	64508690	64508799	ENSMUSG00000025958	Creb1	TRUE	FALSE	no_overlap	NA	NA	NA	NA	Conserved	NA	NA	NA
chr1	64531998	64532245	ENSMUSG00000025958	Creb1	TRUE	TRUE	high_confidence	chr2	207529556	207529756	chr2_207529556_207529756|chr2_207530004_207530105|chr2_207529011_207529186|chr2_207529435_207530229	Conserved	chr2	207528970	207529220
chr1	64531998	64532245	ENSMUSG00000025958	Creb1	TRUE	TRUE	high_confidence	chr2	207530004	207530105	chr2_207529556_207529756|chr2_207530004_207530105|chr2_207529011_207529186|chr2_207529435_207530229	Conserved	chr2	207528970	207529220
chr1	64531998	64532245	ENSMUSG00000025958	Creb1	TRUE	TRUE	high_confidence	chr2	207529011	207529186	chr2_207529556_207529756|chr2_207530004_207530105|chr2_207529011_207529186|chr2_207529435_207530229	Conserved	chr2	207528970	207529220
chr1	64531998	64532245	ENSMUSG00000025958	Creb1	TRUE	TRUE	high_confidence	chr2	207529435	207530229	chr2_207529556_207529756|chr2_207530004_207530105|chr2_207529011_207529186|chr2_207529435_207530229	Conserved	chr2	207528970	207529220
chr1	64532401	64532675	ENSMUSG00000025958	Creb1	TRUE	TRUE	high_confidence	chr2	207529556	207529756	chr2_207529556_207529756|chr2_207530004_207530105|chr2_207529011_207529186|chr2_207529435_207530229|chr2_207530632_207530936	Conserved	chr2	207529494	207529789
chr1	64532401	64532675	ENSMUSG00000025958	Creb1	TRUE	TRUE	high_confidence	chr2	207530004	207530105	chr2_207529556_207529756|chr2_207530004_207530105|chr2_207529011_207529186|chr2_207529435_207530229|chr2_207530632_207530936	Conserved	chr2	207529494	207529789
chr1	64532401	64532675	ENSMUSG00000025958	Creb1	TRUE	TRUE	high_confidence	chr2	207529011	207529186	chr2_207529556_207529756|chr2_207530004_207530105|chr2_207529011_207529186|chr2_207529435_207530229|chr2_207530632_207530936	Conserved	chr2	207529494	207529789
chr1	64532401	64532675	ENSMUSG00000025958	Creb1	TRUE	TRUE	high_confidence	chr2	207529435	207530229	chr2_207529556_207529756|chr2_207530004_207530105|chr2_207529011_207529186|chr2_207529435_207530229|chr2_207530632_207530936	Conserved	chr2	207529494	207529789
chr1	64532401	64532675	ENSMUSG00000025958	Creb1	TRUE	TRUE	high_confidence	chr2	207530632	207530936	chr2_207529556_207529756|chr2_207530004_207530105|chr2_207529011_207529186|chr2_207529435_207530229|chr2_207530632_207530936	Conserved	chr2	207529494	207529789
chr1	64797358	64797516	ENSMUSG00000051344	Plekhm3	TRUE	TRUE	no_overlap	NA	NA	NA	NA	Conserved	chr2	207831470	207831644
chr1	64956707	64956821	ENSMUSG00000051344	Plekhm3	TRUE	TRUE	high_confidence	chr2	208025500	208025645	chr2_208025500_208025645|chr2_208025473_208025685	Conserved	chr2	208025492	208025603
chr1	64956707	64956821	ENSMUSG00000051344	Plekhm3	TRUE	TRUE	high_confidence	chr2	208025473	208025685	chr2_208025500_208025645|chr2_208025473_208025685	Conserved	chr2	208025492	208025603
chr1	64986223	64986338	ENSMUSG00000025955	Akr1cl	FALSE	TRUE	no_overlap	NA	NA	NA	NA	Other	chr2	208062135	208062263
chr1	65186601	65186820	ENSMUSG00000025949	Pikfyve	TRUE	TRUE	high_confidence	chr2	208266085	208266415	chr2_208266085_208266415|chr2_208265497_208265642|chr2_208265877_208266626	Conserved	chr2	208266184	208266402
chr1	65186601	65186820	ENSMUSG00000025949	Pikfyve	TRUE	TRUE	high_confidence	chr2	208265497	208265642	chr2_208266085_208266415|chr2_208265497_208265642|chr2_208265877_208266626	Conserved	chr2	208266184	208266402
chr1	65186601	65186820	ENSMUSG00000025949	Pikfyve	TRUE	TRUE	high_confidence	chr2	208265877	208266626	chr2_208266085_208266415|chr2_208265497_208265642|chr2_208265877_208266626	Conserved	chr2	208266184	208266402
chr1	66280814	66280981	ENSMUSG00000015222	Map2	TRUE	TRUE	no_overlap	NA	NA	NA	NA	Other	chr2	209527298	209527399
chr1	66552687	66552827	ENSMUSG00000055567	Unc80	TRUE	TRUE	no_overlap	NA	NA	NA	NA	Mm-Specific	chr2	209842903	209843074
chr1	66552869	66552882	ENSMUSG00000055567	Unc80	TRUE	TRUE	no_overlap	NA	NA	NA	NA	Mm-Specific	chr2	209843119	209843132
chr1	66649658	66649898	ENSMUSG00000055567	Unc80	TRUE	TRUE	no_overlap	NA	NA	NA	NA	Mm-Specific	chr2	209945831	209946068
chr1	66816144	66816249	ENSMUSG00000026004	Kansl1l	TRUE	TRUE	low_confidence	chr2	210170510	210170636	chr2_210170510_210170636|chr2_210170693_210170851|chr2_210170999_210171186	Other	chr2	210169987	210170081
chr1	66816144	66816249	ENSMUSG00000026004	Kansl1l	TRUE	TRUE	low_confidence	chr2	210170693	210170851	chr2_210170510_210170636|chr2_210170693_210170851|chr2_210170999_210171186	Other	chr2	210169987	210170081
chr1	66816144	66816249	ENSMUSG00000026004	Kansl1l	TRUE	TRUE	low_confidence	chr2	210170999	210171186	chr2_210170510_210170636|chr2_210170693_210170851|chr2_210170999_210171186	Other	chr2	210169987	210170081
chr1	66841954	66842336	ENSMUSG00000026003	Acadl	TRUE	TRUE	no_overlap	NA	NA	NA	NA	Other	chr2	210203978	210204060
chr1	66845796	66845952	ENSMUSG00000026003	Acadl	TRUE	TRUE	no_overlap	NA	NA	NA	NA	Other	chr2	210206603	210206763
chr1	66881815	66881996	ENSMUSG00000026003	Acadl	TRUE	FALSE	no_overlap	NA	NA	NA	NA	Other	NA	NA	NA
chr1	69461277	69461498	ENSMUSG00000025997	Ikzf2	TRUE	TRUE	no_overlap	NA	NA	NA	NA	Other	chr2	212929249	212929480
chr1	69692104	69692185	ENSMUSG00000025997	Ikzf2	TRUE	TRUE	no_overlap	NA	NA	NA	NA	Other	chr2	213156947	213157030
chr1	71103010	71103187	ENSMUSG00000026196	Bard1	TRUE	TRUE	high_confidence	chr2	214809242	214809380	chr2_214809242_214809380|chr2_214808983_214809158|chr2_214809216_214809492|chr2_214809581_214809694|chr2_214809729_214810214	Conserved	chr2	214809853	214810060
chr1	71103010	71103187	ENSMUSG00000026196	Bard1	TRUE	TRUE	high_confidence	chr2	214808983	214809158	chr2_214809242_214809380|chr2_214808983_214809158|chr2_214809216_214809492|chr2_214809581_214809694|chr2_214809729_214810214	Conserved	chr2	214809853	214810060
chr1	71103010	71103187	ENSMUSG00000026196	Bard1	TRUE	TRUE	high_confidence	chr2	214809216	214809492	chr2_214809242_214809380|chr2_214808983_214809158|chr2_214809216_214809492|chr2_214809581_214809694|chr2_214809729_214810214	Conserved	chr2	214809853	214810060
chr1	71103010	71103187	ENSMUSG00000026196	Bard1	TRUE	TRUE	high_confidence	chr2	214809581	214809694	chr2_214809242_214809380|chr2_214808983_214809158|chr2_214809216_214809492|chr2_214809581_214809694|chr2_214809729_214810214	Conserved	chr2	214809853	214810060
chr1	71103010	71103187	ENSMUSG00000026196	Bard1	TRUE	TRUE	high_confidence	chr2	214809729	214810214	chr2_214809242_214809380|chr2_214808983_214809158|chr2_214809216_214809492|chr2_214809581_214809694|chr2_214809729_214810214	Conserved	chr2	214809853	214810060
chr1	72243828	72243926	ENSMUSG00000026189	Pecr	TRUE	FALSE	no_overlap	NA	NA	NA	NA	Other	NA	NA	NA
chr1	73936655	73936904	ENSMUSG00000055322	Tns1	TRUE	TRUE	no_overlap	NA	NA	NA	NA	Other	chr2	217830739	217831044
chr1	73996392	73996528	ENSMUSG00000055322	Tns1	TRUE	TRUE	no_overlap	NA	NA	NA	NA	Other	chr2	217899657	217899791
chr1	74116354	74116477	ENSMUSG00000055322	Tns1	TRUE	FALSE	no_overlap	NA	NA	NA	NA	Other	NA	NA	NA
chr1	74149278	74149495	ENSMUSG00000061815	Rufy4	TRUE	TRUE	no_overlap	NA	NA	NA	NA	Other	chr2	218091575	218091821
chr1	74178706	74178964	ENSMUSG00000048480	Cxcr1	TRUE	TRUE	no_overlap	NA	NA	NA	NA	Other	chr2	218156041	218156303
chr1	74201116	74201226	ENSMUSG00000048480	Cxcr1	TRUE	FALSE	no_overlap	NA	NA	NA	NA	Other	NA	NA	NA
chr1	74201543	74201753	ENSMUSG00000048480	Cxcr1	TRUE	FALSE	no_overlap	NA	NA	NA	NA	Other	NA	NA	NA
chr1	74248949	74249161	ENSMUSG00000006304	Arpc2	TRUE	TRUE	high_confidence	chr2	218231226	218231309	chr2_218231226_218231309|chr2_218229312_218229575|chr2_218231194_218231342	Conserved	chr2	218229408	218229637
chr1	74248949	74249161	ENSMUSG00000006304	Arpc2	TRUE	TRUE	high_confidence	chr2	218229312	218229575	chr2_218231226_218231309|chr2_218229312_218229575|chr2_218231194_218231342	Conserved	chr2	218229408	218229637
chr1	74248949	74249161	ENSMUSG00000006304	Arpc2	TRUE	TRUE	high_confidence	chr2	218231194	218231342	chr2_218231226_218231309|chr2_218229312_218229575|chr2_218231194_218231342	Conserved	chr2	218229408	218229637
chr1	74386821	74387026	ENSMUSG00000026177	Slc11a1	TRUE	TRUE	high_confidence	chr2	218396033	218396334	chr2_218396033_218396334|chr2_218396869_218397068|chr2_218395973_218396468|chr2_218396588_218396684|chr2_218396798_218397110	Conserved	chr2	218396140	218396353
chr1	74386821	74387026	ENSMUSG00000026177	Slc11a1	TRUE	TRUE	high_confidence	chr2	218396869	218397068	chr2_218396033_218396334|chr2_218396869_218397068|chr2_218395973_218396468|chr2_218396588_218396684|chr2_218396798_218397110	Conserved	chr2	218396140	218396353
chr1	74386821	74387026	ENSMUSG00000026177	Slc11a1	TRUE	TRUE	high_confidence	chr2	218395973	218396468	chr2_218396033_218396334|chr2_218396869_218397068|chr2_218395973_218396468|chr2_218396588_218396684|chr2_218396798_218397110	Conserved	chr2	218396140	218396353
chr1	74386821	74387026	ENSMUSG00000026177	Slc11a1	TRUE	TRUE	high_confidence	chr2	218396588	218396684	chr2_218396033_218396334|chr2_218396869_218397068|chr2_218395973_218396468|chr2_218396588_218396684|chr2_218396798_218397110	Conserved	chr2	218396140	218396353
chr1	74386821	74387026	ENSMUSG00000026177	Slc11a1	TRUE	TRUE	high_confidence	chr2	218396798	218397110	chr2_218396033_218396334|chr2_218396869_218397068|chr2_218395973_218396468|chr2_218396588_218396684|chr2_218396798_218397110	Conserved	chr2	218396140	218396353
chr1	74397484	74397615	ENSMUSG00000026176	Ctdsp1	TRUE	TRUE	high_confidence	chr2	218406396	218406719	chr2_218406396_218406719|chr2_218407145_218407360|chr2_218405947_218406190|chr2_218406300_218406796|chr2_218407118_218407404	Conserved	chr2	218406522	218406691
chr1	74397484	74397615	ENSMUSG00000026176	Ctdsp1	TRUE	TRUE	high_confidence	chr2	218407145	218407360	chr2_218406396_218406719|chr2_218407145_218407360|chr2_218405947_218406190|chr2_218406300_218406796|chr2_218407118_218407404	Conserved	chr2	218406522	218406691
chr1	74397484	74397615	ENSMUSG00000026176	Ctdsp1	TRUE	TRUE	high_confidence	chr2	218405947	218406190	chr2_218406396_218406719|chr2_218407145_218407360|chr2_218405947_218406190|chr2_218406300_218406796|chr2_218407118_218407404	Conserved	chr2	218406522	218406691
chr1	74397484	74397615	ENSMUSG00000026176	Ctdsp1	TRUE	TRUE	high_confidence	chr2	218406300	218406796	chr2_218406396_218406719|chr2_218407145_218407360|chr2_218405947_218406190|chr2_218406300_218406796|chr2_218407118_218407404	Conserved	chr2	218406522	218406691
chr1	74397484	74397615	ENSMUSG00000026176	Ctdsp1	TRUE	TRUE	high_confidence	chr2	218407118	218407404	chr2_218406396_218406719|chr2_218407145_218407360|chr2_218405947_218406190|chr2_218406300_218406796|chr2_218407118_218407404	Conserved	chr2	218406522	218406691
chr1	74398073	74398343	ENSMUSG00000026176	Ctdsp1	TRUE	TRUE	high_confidence	chr2	218406396	218406719	chr2_218406396_218406719|chr2_218407145_218407360|chr2_218405947_218406190|chr2_218406300_218406796|chr2_218407118_218407404	Conserved	chr2	218407164	218407370
chr1	74398073	74398343	ENSMUSG00000026176	Ctdsp1	TRUE	TRUE	high_confidence	chr2	218407145	218407360	chr2_218406396_218406719|chr2_218407145_218407360|chr2_218405947_218406190|chr2_218406300_218406796|chr2_218407118_218407404	Conserved	chr2	218407164	218407370
chr1	74398073	74398343	ENSMUSG00000026176	Ctdsp1	TRUE	TRUE	high_confidence	chr2	218405947	218406190	chr2_218406396_218406719|chr2_218407145_218407360|chr2_218405947_218406190|chr2_218406300_218406796|chr2_218407118_218407404	Conserved	chr2	218407164	218407370
chr1	74398073	74398343	ENSMUSG00000026176	Ctdsp1	TRUE	TRUE	high_confidence	chr2	218406300	218406796	chr2_218406396_218406719|chr2_218407145_218407360|chr2_218405947_218406190|chr2_218406300_218406796|chr2_218407118_218407404	Conserved	chr2	218407164	218407370
chr1	74398073	74398343	ENSMUSG00000026176	Ctdsp1	TRUE	TRUE	high_confidence	chr2	218407118	218407404	chr2_218406396_218406719|chr2_218407145_218407360|chr2_218405947_218406190|chr2_218406300_218406796|chr2_218407118_218407404	Conserved	chr2	218407164	218407370
chr1	74588134	74588388	ENSMUSG00000026172	Bcs1l	TRUE	TRUE	high_confidence	chr2	218659549	218659813	chr2_218659549_218659813|chr2_218659441_218659895	Conserved	chr2	218659526	218659793
chr1	74588134	74588388	ENSMUSG00000026172	Bcs1l	TRUE	TRUE	high_confidence	chr2	218659441	218659895	chr2_218659549_218659813|chr2_218659441_218659895	Conserved	chr2	218659526	218659793
chr1	74806618	74806856	ENSMUSG00000026167	Wnt10a	TRUE	TRUE	high_confidence	chr2	218896565	218896676	chr2_218896565_218896676|chr2_218896314_218896865|chr2_218897001_218897237|chr2_218897338_218897552	Conserved	chr2	218896560	218896799
chr1	74806618	74806856	ENSMUSG00000026167	Wnt10a	TRUE	TRUE	high_confidence	chr2	218896314	218896865	chr2_218896565_218896676|chr2_218896314_218896865|chr2_218897001_218897237|chr2_218897338_218897552	Conserved	chr2	218896560	218896799
chr1	74806618	74806856	ENSMUSG00000026167	Wnt10a	TRUE	TRUE	high_confidence	chr2	218897001	218897237	chr2_218896565_218896676|chr2_218896314_218896865|chr2_218897001_218897237|chr2_218897338_218897552	Conserved	chr2	218896560	218896799
chr1	74806618	74806856	ENSMUSG00000026167	Wnt10a	TRUE	TRUE	high_confidence	chr2	218897338	218897552	chr2_218896565_218896676|chr2_218896314_218896865|chr2_218897001_218897237|chr2_218897338_218897552	Conserved	chr2	218896560	218896799
chr1	75142695	75142822	ENSMUSG00000049339	Retreg2	TRUE	TRUE	high_confidence	chr2	219176903	219177238	chr2_219176903_219177238|chr2_219178164_219178272|chr2_219176855_219177294|chr2_219177710_219178340|chr2_219178473_219178594	Conserved	chr2	219178175	219178312
chr1	75142695	75142822	ENSMUSG00000049339	Retreg2	TRUE	TRUE	high_confidence	chr2	219178164	219178272	chr2_219176903_219177238|chr2_219178164_219178272|chr2_219176855_219177294|chr2_219177710_219178340|chr2_219178473_219178594	Conserved	chr2	219178175	219178312
chr1	75142695	75142822	ENSMUSG00000049339	Retreg2	TRUE	TRUE	high_confidence	chr2	219176855	219177294	chr2_219176903_219177238|chr2_219178164_219178272|chr2_219176855_219177294|chr2_219177710_219178340|chr2_219178473_219178594	Conserved	chr2	219178175	219178312
chr1	75142695	75142822	ENSMUSG00000049339	Retreg2	TRUE	TRUE	high_confidence	chr2	219177710	219178340	chr2_219176903_219177238|chr2_219178164_219178272|chr2_219176855_219177294|chr2_219177710_219178340|chr2_219178473_219178594	Conserved	chr2	219178175	219178312
chr1	75142695	75142822	ENSMUSG00000049339	Retreg2	TRUE	TRUE	high_confidence	chr2	219178473	219178594	chr2_219176903_219177238|chr2_219178164_219178272|chr2_219176855_219177294|chr2_219177710_219178340|chr2_219178473_219178594	Conserved	chr2	219178175	219178312
chr1	75187978	75188160	ENSMUSG00000033124	Atg9a	FALSE	TRUE	no_overlap	NA	NA	NA	NA	Other	chr2	219225444	219225626
chr1	75317964	75318109	ENSMUSG00000026209	Dnpep	TRUE	TRUE	high_confidence	chr2	219388491	219388680	chr2_219388491_219388680|chr2_219387597_219387960|chr2_219388384_219388696	Conserved	chr2	219388511	219388811
chr1	75317964	75318109	ENSMUSG00000026209	Dnpep	TRUE	TRUE	high_confidence	chr2	219387597	219387960	chr2_219388491_219388680|chr2_219387597_219387960|chr2_219388384_219388696	Conserved	chr2	219388511	219388811
chr1	75317964	75318109	ENSMUSG00000026209	Dnpep	TRUE	TRUE	high_confidence	chr2	219388384	219388696	chr2_219388491_219388680|chr2_219387597_219387960|chr2_219388384_219388696	Conserved	chr2	219388511	219388811
chr1	78478045	78478152	ENSMUSG00000026245	Farsb	TRUE	TRUE	no_overlap	NA	NA	NA	NA	Other	chr2	222640768	222640820
chr1	78537526	78537862	ENSMUSG00000012187	Mogat1	TRUE	TRUE	low_confidence	chr2	222708357	222708476	chr2_222708357_222708476	Other	chr2	222709038	222709655
chr1	78538400	78538609	ENSMUSG00000012187	Mogat1	TRUE	TRUE	no_overlap	NA	NA	NA	NA	Other	chr2	222710103	222710638
chr1	78591366	78591490	ENSMUSG00000012187	Mogat1	TRUE	TRUE	no_overlap	NA	NA	NA	NA	Other	chr2	222784586	222784684
chr1	79365614	79365783	ENSMUSG00000050711	Scg2	TRUE	TRUE	no_overlap	NA	NA	NA	NA	Other	chr2	223528154	223528324
chr1	79559391	79559671	ENSMUSG00000054702	Ap1s3	TRUE	TRUE	no_overlap	NA	NA	NA	NA	Alternate	chr2	223697975	223698254
chr1	79581419	79581848	ENSMUSG00000054702	Ap1s3	TRUE	TRUE	no_overlap	NA	NA	NA	NA	Alternate	chr2	223725585	223726009
chr1	79703617	79703782	ENSMUSG00000073643	Wdfy1	TRUE	TRUE	no_overlap	NA	NA	NA	NA	Conserved	chr2	223876761	223876966
chr1	79751567	79751700	ENSMUSG00000073643	Wdfy1	TRUE	TRUE	no_overlap	NA	NA	NA	NA	Conserved	chr2	223933268	223933407
chr1	79752456	79752710	ENSMUSG00000073643	Wdfy1	TRUE	TRUE	no_overlap	NA	NA	NA	NA	Conserved	chr2	223935210	223935380
chr1	79761692	79761883	ENSMUSG00000073643	Wdfy1	TRUE	TRUE	high_confidence	chr2	223945246	223945470	chr2_223945246_223945470|chr2_223945120_223945506	Conserved	chr2	223945276	223945486
chr1	79761692	79761883	ENSMUSG00000073643	Wdfy1	TRUE	TRUE	high_confidence	chr2	223945120	223945506	chr2_223945246_223945470|chr2_223945120_223945506	Conserved	chr2	223945276	223945486
chr1	80015552	80015745	ENSMUSG00000026249	Serpine2	TRUE	TRUE	no_overlap	NA	NA	NA	NA	Other	chr2	224191542	224191728
chr1	80107904	80108058	ENSMUSG00000043230	Fam124b	TRUE	TRUE	no_overlap	NA	NA	NA	NA	Other	chr2	224285848	224286020
chr1	80324535	80324643	ENSMUSG00000004364	Cul3	TRUE	TRUE	no_overlap	NA	NA	NA	NA	Other	chr2	224560767	224560896
chr1	80362476	80362774	ENSMUSG00000004364	Cul3	TRUE	TRUE	no_overlap	NA	NA	NA	NA	Other	NA	NA	NA
chr1	80381356	80381604	ENSMUSG00000004364	Cul3	TRUE	TRUE	no_overlap	NA	NA	NA	NA	Other	NA	NA	NA
chr1	80405318	80405482	ENSMUSG00000110100	Gm45261	TRUE	TRUE	no_overlap	NA	NA	NA	NA	Other	NA	NA	NA
chr1	80603318	80603448	ENSMUSG00000038608	Dock10	TRUE	TRUE	no_overlap	NA	NA	NA	NA	Conserved	chr2	224882833	224882963
chr1	80639846	80640006	ENSMUSG00000038608	Dock10	TRUE	TRUE	no_overlap	NA	NA	NA	NA	Conserved	chr2	224924364	224924408
chr1	80641913	80642090	ENSMUSG00000038608	Dock10	TRUE	TRUE	high_confidence	chr2	224926347	224926482	chr2_224926347_224926482|chr2_224925747_224925967|chr2_224926177_224926511	Conserved	chr2	224925774	224925971
chr1	80641913	80642090	ENSMUSG00000038608	Dock10	TRUE	TRUE	high_confidence	chr2	224925747	224925967	chr2_224926347_224926482|chr2_224925747_224925967|chr2_224926177_224926511	Conserved	chr2	224925774	224925971
chr1	80641913	80642090	ENSMUSG00000038608	Dock10	TRUE	TRUE	high_confidence	chr2	224926177	224926511	chr2_224926347_224926482|chr2_224925747_224925967|chr2_224926177_224926511	Conserved	chr2	224925774	224925971
chr1	80644136	80644267	ENSMUSG00000038608	Dock10	TRUE	TRUE	high_confidence	chr2	224928071	224928232	chr2_224928071_224928232|chr2_224927896_224928318	Conserved	chr2	224927786	224927918
chr1	80644136	80644267	ENSMUSG00000038608	Dock10	TRUE	TRUE	high_confidence	chr2	224927896	224928318	chr2_224928071_224928232|chr2_224927896_224928318	Conserved	chr2	224927786	224927918
chr1	80665254	80665453	ENSMUSG00000038608	Dock10	TRUE	TRUE	high_confidence	chr2	224947022	224947263	chr2_224947022_224947263|chr2_224947009_224947350	Conserved	chr2	224947012	224947206
chr1	80665254	80665453	ENSMUSG00000038608	Dock10	TRUE	TRUE	high_confidence	chr2	224947009	224947350	chr2_224947022_224947263|chr2_224947009_224947350	Conserved	chr2	224947012	224947206
chr1	80728341	80728442	ENSMUSG00000038608	Dock10	TRUE	TRUE	low_confidence	chr2	225009064	225009197	chr2_225009064_225009197	Conserved	chr2	225009865	225009966
chr1	80737932	80738049	ENSMUSG00000038608	Dock10	TRUE	TRUE	no_overlap	NA	NA	NA	NA	Conserved	chr2	225020295	225020416
chr1	80746124	80746514	ENSMUSG00000038608	Dock10	TRUE	TRUE	no_overlap	NA	NA	NA	NA	Conserved	chr2	225028694	225029081
chr1	80749419	80749583	ENSMUSG00000038608	Dock10	TRUE	TRUE	no_overlap	NA	NA	NA	NA	Conserved	chr2	225033971	225034161
chr1	80755393	80755539	ENSMUSG00000038608	Dock10	TRUE	TRUE	low_confidence	chr2	225037700	225038375	chr2_225037700_225038375|chr2_225039610_225039780	Conserved	chr2	225039459	225039623
chr1	80755393	80755539	ENSMUSG00000038608	Dock10	TRUE	TRUE	low_confidence	chr2	225039610	225039780	chr2_225037700_225038375|chr2_225039610_225039780	Conserved	chr2	225039459	225039623
chr1	80757463	80757637	ENSMUSG00000038608	Dock10	TRUE	TRUE	high_confidence	chr2	225040940	225041098	chr2_225040940_225041098|chr2_225040862_225041898|chr2_225041967_225042162|chr2_225042318_225042667	Conserved	chr2	225041374	225041541
chr1	80757463	80757637	ENSMUSG00000038608	Dock10	TRUE	TRUE	high_confidence	chr2	225040862	225041898	chr2_225040940_225041098|chr2_225040862_225041898|chr2_225041967_225042162|chr2_225042318_225042667	Conserved	chr2	225041374	225041541
chr1	80757463	80757637	ENSMUSG00000038608	Dock10	TRUE	TRUE	high_confidence	chr2	225041967	225042162	chr2_225040940_225041098|chr2_225040862_225041898|chr2_225041967_225042162|chr2_225042318_225042667	Conserved	chr2	225041374	225041541
chr1	80757463	80757637	ENSMUSG00000038608	Dock10	TRUE	TRUE	high_confidence	chr2	225042318	225042667	chr2_225040940_225041098|chr2_225040862_225041898|chr2_225041967_225042162|chr2_225042318_225042667	Conserved	chr2	225041374	225041541
chr1	80765622	80765900	ENSMUSG00000038608	Dock10	TRUE	TRUE	high_confidence	chr2	225052770	225053035	chr2_225052770_225053035|chr2_225052680_225053089	Conserved	chr2	225052789	225053100
chr1	80765622	80765900	ENSMUSG00000038608	Dock10	TRUE	TRUE	high_confidence	chr2	225052680	225053089	chr2_225052770_225053035|chr2_225052680_225053089	Conserved	chr2	225052789	225053100
chr1	82832010	82832133	ENSMUSG00000026159	Agfg1	TRUE	TRUE	low_confidence	chr2	227464468	227464715	chr2_227464468_227464715	Other	chr2	227463883	227464058
chr1	82832471	82832993	ENSMUSG00000026159	Agfg1	TRUE	TRUE	low_confidence	chr2	227464468	227464715	chr2_227464468_227464715	Other	chr2	227464409	227464942
chr1	82869546	82869662	ENSMUSG00000026159	Agfg1	TRUE	TRUE	no_overlap	NA	NA	NA	NA	Other	NA	NA	NA
chr1	82879236	82879472	ENSMUSG00000026159	Agfg1	TRUE	TRUE	no_overlap	NA	NA	NA	NA	Other	chr2	227530694	227530711
chr1	84881606	84881724	ENSMUSG00000073633	Fbxo36	TRUE	TRUE	no_overlap	NA	NA	NA	NA	Other	NA	NA	NA
chr1	85687540	85687643	ENSMUSG00000026222	Sp100	TRUE	TRUE	low_confidence	chr2	230472752	230473048	chr2_230472752_230473048|chr2_230473492_230473634	Other	chr2	230473572	230473677
chr1	85687540	85687643	ENSMUSG00000026222	Sp100	TRUE	TRUE	low_confidence	chr2	230473492	230473634	chr2_230472752_230473048|chr2_230473492_230473634	Other	chr2	230473572	230473677
chr1	85732641	85732867	ENSMUSG00000052760	A630001G21Rik	FALSE	FALSE	no_overlap	NA	NA	NA	NA	Other	NA	NA	NA
chr1	85739852	85740077	ENSMUSG00000052760	A630001G21Rik	FALSE	TRUE	low_confidence	chr2	230643997	230644243	chr2_230643997_230644243	Other	chr2	230643956	230644205
chr1	85751612	85751839	ENSMUSG00000052760	A630001G21Rik	FALSE	TRUE	high_confidence	chr2	230659349	230659460	chr2_230659349_230659460|chr2_230660725_230660928|chr2_230661681_230661889|chr2_230659200_230659773|chr2_230660625_230661002|chr2_230661595_230662051	Other	chr2	230660760	230661047
chr1	85751612	85751839	ENSMUSG00000052760	A630001G21Rik	FALSE	TRUE	high_confidence	chr2	230660725	230660928	chr2_230659349_230659460|chr2_230660725_230660928|chr2_230661681_230661889|chr2_230659200_230659773|chr2_230660625_230661002|chr2_230661595_230662051	Other	chr2	230660760	230661047
chr1	85751612	85751839	ENSMUSG00000052760	A630001G21Rik	FALSE	TRUE	high_confidence	chr2	230661681	230661889	chr2_230659349_230659460|chr2_230660725_230660928|chr2_230661681_230661889|chr2_230659200_230659773|chr2_230660625_230661002|chr2_230661595_230662051	Other	chr2	230660760	230661047
chr1	85751612	85751839	ENSMUSG00000052760	A630001G21Rik	FALSE	TRUE	high_confidence	chr2	230659200	230659773	chr2_230659349_230659460|chr2_230660725_230660928|chr2_230661681_230661889|chr2_230659200_230659773|chr2_230660625_230661002|chr2_230661595_230662051	Other	chr2	230660760	230661047
chr1	85751612	85751839	ENSMUSG00000052760	A630001G21Rik	FALSE	TRUE	high_confidence	chr2	230660625	230661002	chr2_230659349_230659460|chr2_230660725_230660928|chr2_230661681_230661889|chr2_230659200_230659773|chr2_230660625_230661002|chr2_230661595_230662051	Other	chr2	230660760	230661047
chr1	85751612	85751839	ENSMUSG00000052760	A630001G21Rik	FALSE	TRUE	high_confidence	chr2	230661595	230662051	chr2_230659349_230659460|chr2_230660725_230660928|chr2_230661681_230661889|chr2_230659200_230659773|chr2_230660625_230661002|chr2_230661595_230662051	Other	chr2	230660760	230661047
chr1	85793316	85793458	ENSMUSG00000036707	Cab39	TRUE	TRUE	high_confidence	chr2	230712724	230712849	chr2_230712724_230712849|chr2_230712520_230712948|chr2_230713783_230713886	Conserved	chr2	230712731	230712873
chr1	85793316	85793458	ENSMUSG00000036707	Cab39	TRUE	TRUE	high_confidence	chr2	230712520	230712948	chr2_230712724_230712849|chr2_230712520_230712948|chr2_230713783_230713886	Conserved	chr2	230712731	230712873
chr1	85793316	85793458	ENSMUSG00000036707	Cab39	TRUE	TRUE	high_confidence	chr2	230713783	230713886	chr2_230712724_230712849|chr2_230712520_230712948|chr2_230713783_230713886	Conserved	chr2	230712731	230712873
chr1	85838135	85838349	ENSMUSG00000036707	Cab39	TRUE	TRUE	high_confidence	chr2	230794070	230794328	chr2_230794070_230794328|chr2_230793940_230794365	Conserved	chr2	230794116	230794370
chr1	85838135	85838349	ENSMUSG00000036707	Cab39	TRUE	TRUE	high_confidence	chr2	230793940	230794365	chr2_230794070_230794328|chr2_230793940_230794365	Conserved	chr2	230794116	230794370
chr1	85845620	85845793	ENSMUSG00000036707	Cab39	TRUE	TRUE	no_overlap	NA	NA	NA	NA	Conserved	chr2	230811349	230811521
chr1	85957480	85957586	ENSMUSG00000049608	Gpr55	TRUE	TRUE	low_confidence	chr2	230924784	230925013	chr2_230924784_230925013|chr2_230926055_230926260	Other	chr2	230924856	230924968
chr1	85957480	85957586	ENSMUSG00000049608	Gpr55	TRUE	TRUE	low_confidence	chr2	230926055	230926260	chr2_230924784_230925013|chr2_230926055_230926260	Other	chr2	230924856	230924968
chr1	85962323	85962539	ENSMUSG00000049608	Gpr55	TRUE	TRUE	low_confidence	chr2	230931472	230931692	chr2_230931472_230931692	Other	chr2	230930815	230931060
chr1	85985940	85986133	ENSMUSG00000049608	Gpr55	TRUE	TRUE	no_overlap	NA	NA	NA	NA	Other	chr2	230953947	230954110
chr1	85998101	85998193	ENSMUSG00000026226	Spata3	TRUE	TRUE	high_confidence	chr2	230974190	230974507	chr2_230974190_230974507|chr2_230974145_230974639	Conserved	NA	NA	NA
chr1	85998101	85998193	ENSMUSG00000026226	Spata3	TRUE	TRUE	high_confidence	chr2	230974145	230974639	chr2_230974190_230974507|chr2_230974145_230974639	Conserved	NA	NA	NA
chr1	86005668	86005835	ENSMUSG00000026226	Spata3	TRUE	TRUE	high_confidence	chr2	230984552	230984721	chr2_230984552_230984721|chr2_230984454_230984799	Conserved	NA	NA	NA
chr1	86005668	86005835	ENSMUSG00000026226	Spata3	TRUE	TRUE	high_confidence	chr2	230984454	230984799	chr2_230984552_230984721|chr2_230984454_230984799	Conserved	NA	NA	NA
chr1	86006153	86006262	ENSMUSG00000026226	Spata3	TRUE	TRUE	high_confidence	chr2	230984552	230984721	chr2_230984552_230984721|chr2_230984454_230984799	Conserved	chr2	230984576	230984685
chr1	86006153	86006262	ENSMUSG00000026226	Spata3	TRUE	TRUE	high_confidence	chr2	230984454	230984799	chr2_230984552_230984721|chr2_230984454_230984799	Conserved	chr2	230984576	230984685
chr1	86064292	86064398	ENSMUSG00000026229	Psmd1	TRUE	TRUE	high_confidence	chr2	231056511	231056646	chr2_231056511_231056646|chr2_231056480_231057012	Conserved	chr2	231056543	231056636
chr1	86064292	86064398	ENSMUSG00000026229	Psmd1	TRUE	TRUE	high_confidence	chr2	231056480	231057012	chr2_231056511_231056646|chr2_231056480_231057012	Conserved	chr2	231056543	231056636
chr1	86394401	86394572	ENSMUSG00000026237	Nmur1	TRUE	FALSE	no_overlap	NA	NA	NA	NA	Other	NA	NA	NA
chr1	86415915	86416106	ENSMUSG00000026237	Nmur1	TRUE	FALSE	no_overlap	NA	NA	NA	NA	Other	NA	NA	NA
chr1	86441524	86441667	ENSMUSG00000036574	Tex44	TRUE	TRUE	low_confidence	chr2	231612567	231612784	chr2_231612567_231612784|chr2_231613732_231614098|chr2_231614138_231614421	Other	chr2	231613316	231613354
chr1	86441524	86441667	ENSMUSG00000036574	Tex44	TRUE	TRUE	low_confidence	chr2	231613732	231614098	chr2_231612567_231612784|chr2_231613732_231614098|chr2_231614138_231614421	Other	chr2	231613316	231613354
chr1	86441524	86441667	ENSMUSG00000036574	Tex44	TRUE	TRUE	low_confidence	chr2	231614138	231614421	chr2_231612567_231612784|chr2_231613732_231614098|chr2_231614138_231614421	Other	chr2	231613316	231613354
chr1	86442525	86442666	ENSMUSG00000036574	Tex44	TRUE	TRUE	low_confidence	chr2	231613732	231614098	chr2_231613732_231614098|chr2_231614138_231614421	Other	chr2	231614255	231614393
chr1	86442525	86442666	ENSMUSG00000036574	Tex44	TRUE	TRUE	low_confidence	chr2	231614138	231614421	chr2_231613732_231614098|chr2_231614138_231614421	Other	chr2	231614255	231614393
chr1	86509531	86509634	ENSMUSG00000026238	Ptma	TRUE	TRUE	no_overlap	NA	NA	NA	NA	Conserved	chr2	231687365	231687483
chr1	86525295	86525486	ENSMUSG00000026238	Ptma	TRUE	TRUE	high_confidence	chr2	231706990	231707199	chr2_231706990_231707199|chr2_231708086_231708307|chr2_231706341_231706644|chr2_231706809_231707240|chr2_231708011_231708664	Conserved	chr2	231706991	231707181
chr1	86525295	86525486	ENSMUSG00000026238	Ptma	TRUE	TRUE	high_confidence	chr2	231708086	231708307	chr2_231706990_231707199|chr2_231708086_231708307|chr2_231706341_231706644|chr2_231706809_231707240|chr2_231708011_231708664	Conserved	chr2	231706991	231707181
chr1	86525295	86525486	ENSMUSG00000026238	Ptma	TRUE	TRUE	high_confidence	chr2	231706341	231706644	chr2_231706990_231707199|chr2_231708086_231708307|chr2_231706341_231706644|chr2_231706809_231707240|chr2_231708011_231708664	Conserved	chr2	231706991	231707181
chr1	86525295	86525486	ENSMUSG00000026238	Ptma	TRUE	TRUE	high_confidence	chr2	231706809	231707240	chr2_231706990_231707199|chr2_231708086_231708307|chr2_231706341_231706644|chr2_231706809_231707240|chr2_231708011_231708664	Conserved	chr2	231706991	231707181
chr1	86525295	86525486	ENSMUSG00000026238	Ptma	TRUE	TRUE	high_confidence	chr2	231708011	231708664	chr2_231706990_231707199|chr2_231708086_231708307|chr2_231706341_231706644|chr2_231706809_231707240|chr2_231708011_231708664	Conserved	chr2	231706991	231707181
chr1	86528272	86528390	ENSMUSG00000026238	Ptma	TRUE	TRUE	high_confidence	chr2	231710294	231710498	chr2_231710294_231710498|chr2_231709079_231709630|chr2_231710172_231710527	Conserved	chr2	231710327	231710445
chr1	86528272	86528390	ENSMUSG00000026238	Ptma	TRUE	TRUE	high_confidence	chr2	231709079	231709630	chr2_231710294_231710498|chr2_231709079_231709630|chr2_231710172_231710527	Conserved	chr2	231710327	231710445
chr1	86528272	86528390	ENSMUSG00000026238	Ptma	TRUE	TRUE	high_confidence	chr2	231710172	231710527	chr2_231710294_231710498|chr2_231709079_231709630|chr2_231710172_231710527	Conserved	chr2	231710327	231710445
chr1	86580570	86580713	ENSMUSG00000026239	Pde6d	TRUE	TRUE	low_confidence	chr2	231780224	231780328	chr2_231780224_231780328	Other	NA	NA	NA
chr1	87180944	87181168	ENSMUSG00000036480	Prss56	TRUE	TRUE	no_overlap	NA	NA	NA	NA	Other	chr2	232515916	232516136
chr1	87181407	87181528	ENSMUSG00000036480	Prss56	TRUE	TRUE	no_overlap	NA	NA	NA	NA	Other	NA	NA	NA
chr1	87255287	87255574	ENSMUSG00000026255	Efhd1	TRUE	FALSE	no_overlap	NA	NA	NA	NA	Other	NA	NA	NA
chr1	87316040	87316116	ENSMUSG00000026255	Efhd1	TRUE	TRUE	no_overlap	NA	NA	NA	NA	Other	NA	NA	NA
chr1	87378090	87378304	ENSMUSG00000048000	Gigyf2	TRUE	TRUE	no_overlap	NA	NA	NA	NA	Alternate	NA	NA	NA
chr1	87551131	87551302	ENSMUSG00000026259	Ngef	TRUE	TRUE	no_overlap	NA	NA	NA	NA	Mm-Specific	chr2	232980013	232980225
chr1	87621547	87621683	ENSMUSG00000026288	Inpp5d	TRUE	TRUE	low_confidence	chr2	233061914	233062102	chr2_233061914_233062102	Conserved	chr2	233061536	233061670
chr1	87626450	87626680	ENSMUSG00000026288	Inpp5d	TRUE	TRUE	no_overlap	NA	NA	NA	NA	Conserved	chr2	233068660	233068900
chr1	87637201	87637468	ENSMUSG00000026288	Inpp5d	TRUE	TRUE	high_confidence	chr2	233080371	233080490	chr2_233080371_233080490|chr2_233080353_233080568|chr2_233081200_233081651|chr2_233082250_233082583	Conserved	chr2	233081365	233081644
chr1	87637201	87637468	ENSMUSG00000026288	Inpp5d	TRUE	TRUE	high_confidence	chr2	233080353	233080568	chr2_233080371_233080490|chr2_233080353_233080568|chr2_233081200_233081651|chr2_233082250_233082583	Conserved	chr2	233081365	233081644
chr1	87637201	87637468	ENSMUSG00000026288	Inpp5d	TRUE	TRUE	high_confidence	chr2	233081200	233081651	chr2_233080371_233080490|chr2_233080353_233080568|chr2_233081200_233081651|chr2_233082250_233082583	Conserved	chr2	233081365	233081644
chr1	87637201	87637468	ENSMUSG00000026288	Inpp5d	TRUE	TRUE	high_confidence	chr2	233082250	233082583	chr2_233080371_233080490|chr2_233080353_233080568|chr2_233081200_233081651|chr2_233082250_233082583	Conserved	chr2	233081365	233081644
chr1	87637548	87637651	ENSMUSG00000026288	Inpp5d	TRUE	TRUE	low_confidence	chr2	233081200	233081651	chr2_233081200_233081651|chr2_233082250_233082583	Conserved	chr2	233081729	233081835
chr1	87637548	87637651	ENSMUSG00000026288	Inpp5d	TRUE	TRUE	low_confidence	chr2	233082250	233082583	chr2_233081200_233081651|chr2_233082250_233082583	Conserved	chr2	233081729	233081835
chr1	87755830	87756041	ENSMUSG00000026289	Atg16l1	TRUE	TRUE	low_confidence	chr2	233251392	233251697	chr2_233251392_233251697	Other	chr2	233251452	233251668
chr1	87828431	87828556	ENSMUSG00000056055	Sag	TRUE	TRUE	high_confidence	chr2	233331591	233331892	chr2_233331591_233331892|chr2_233331552_233331911	Conserved	chr2	233331674	233331813
chr1	87828431	87828556	ENSMUSG00000056055	Sag	TRUE	TRUE	high_confidence	chr2	233331552	233331911	chr2_233331591_233331892|chr2_233331552_233331911	Conserved	chr2	233331674	233331813
chr1	87885668	87885828	ENSMUSG00000070738	Dgkd	TRUE	TRUE	no_overlap	NA	NA	NA	NA	Conserved	NA	NA	NA
chr1	87901119	87901274	ENSMUSG00000070738	Dgkd	TRUE	TRUE	high_confidence	chr2	233419647	233419947	chr2_233419647_233419947|chr2_233418643_233419013|chr2_233419023_233419264|chr2_233419611_233420001	Conserved	chr2	233419073	233419246
chr1	87901119	87901274	ENSMUSG00000070738	Dgkd	TRUE	TRUE	high_confidence	chr2	233418643	233419013	chr2_233419647_233419947|chr2_233418643_233419013|chr2_233419023_233419264|chr2_233419611_233420001	Conserved	chr2	233419073	233419246
chr1	87901119	87901274	ENSMUSG00000070738	Dgkd	TRUE	TRUE	high_confidence	chr2	233419023	233419264	chr2_233419647_233419947|chr2_233418643_233419013|chr2_233419023_233419264|chr2_233419611_233420001	Conserved	chr2	233419073	233419246
chr1	87901119	87901274	ENSMUSG00000070738	Dgkd	TRUE	TRUE	high_confidence	chr2	233419611	233420001	chr2_233419647_233419947|chr2_233418643_233419013|chr2_233419023_233419264|chr2_233419611_233420001	Conserved	chr2	233419073	233419246
chr1	87931589	87931716	ENSMUSG00000070738	Dgkd	TRUE	TRUE	no_overlap	NA	NA	NA	NA	Conserved	chr2	233454528	233454637
chr1	88094484	88094591	ENSMUSG00000089675	Ugt1a8	FALSE	TRUE	no_overlap	NA	NA	NA	NA	Other	chr2	233671252	233671367
chr1	88098002	88098107	ENSMUSG00000090124	Ugt1a7c	FALSE	TRUE	no_overlap	NA	NA	NA	NA	Other	chr2	233636643	233636759
chr1	88129655	88129789	ENSMUSG00000090145	Ugt1a6b	FALSE	TRUE	no_overlap	NA	NA	NA	NA	Other	chr2	233682036	233682181
chr1	88450786	88450925	ENSMUSG00000026295	Spp2	TRUE	TRUE	no_overlap	NA	NA	NA	NA	Other	chr2	234115143	234115299
chr1	88474672	88474884	ENSMUSG00000062310	Glrp1	FALSE	TRUE	low_confidence	chr2	234147608	234147832	chr2_234147608_234147832	Other	chr2	234146434	234146634
chr1	88474940	88475016	ENSMUSG00000062310	Glrp1	FALSE	TRUE	low_confidence	chr2	234147608	234147832	chr2_234147608_234147832	Other	chr2	234146694	234146706
chr1	88475552	88475715	ENSMUSG00000062310	Glrp1	FALSE	TRUE	low_confidence	chr2	234147608	234147832	chr2_234147608_234147832	Other	chr2	234147612	234147777
chr1	88578462	88578585	ENSMUSG00000062310	Glrp1	FALSE	TRUE	no_overlap	NA	NA	NA	NA	Other	NA	NA	NA
chr1	88584661	88584846	ENSMUSG00000062310	Glrp1	FALSE	TRUE	no_overlap	NA	NA	NA	NA	Other	chr2	234305091	234305320
chr1	88587430	88587761	ENSMUSG00000062310	Glrp1	FALSE	TRUE	low_confidence	chr2	234308842	234309201	chr2_234308842_234309201	Other	chr2	234308846	234309209
chr1	88626539	88626708	ENSMUSG00000049866	Arl4c	TRUE	TRUE	no_overlap	NA	NA	NA	NA	Conserved	chr2	234377978	234378080
chr1	88646716	88646823	ENSMUSG00000049866	Arl4c	TRUE	TRUE	no_overlap	NA	NA	NA	NA	Conserved	NA	NA	NA
chr1	88654764	88655075	ENSMUSG00000049866	Arl4c	TRUE	TRUE	high_confidence	chr2	234425941	234426242	chr2_234425941_234426242|chr2_234426289_234426433|chr2_234425874_234426499|chr2_234427475_234427685	Conserved	chr2	234425671	234426231
chr1	88654764	88655075	ENSMUSG00000049866	Arl4c	TRUE	TRUE	high_confidence	chr2	234426289	234426433	chr2_234425941_234426242|chr2_234426289_234426433|chr2_234425874_234426499|chr2_234427475_234427685	Conserved	chr2	234425671	234426231
chr1	88654764	88655075	ENSMUSG00000049866	Arl4c	TRUE	TRUE	high_confidence	chr2	234425874	234426499	chr2_234425941_234426242|chr2_234426289_234426433|chr2_234425874_234426499|chr2_234427475_234427685	Conserved	chr2	234425671	234426231
chr1	88654764	88655075	ENSMUSG00000049866	Arl4c	TRUE	TRUE	high_confidence	chr2	234427475	234427685	chr2_234425941_234426242|chr2_234426289_234426433|chr2_234425874_234426499|chr2_234427475_234427685	Conserved	chr2	234425671	234426231
chr1	88661357	88661504	ENSMUSG00000049866	Arl4c	TRUE	TRUE	no_overlap	NA	NA	NA	NA	Conserved	NA	NA	NA
chr1	89602996	89603181	ENSMUSG00000055013	Agap1	TRUE	TRUE	no_overlap	NA	NA	NA	NA	Other	NA	NA	NA
chr1	89730862	89730999	ENSMUSG00000055013	Agap1	TRUE	TRUE	no_overlap	NA	NA	NA	NA	Other	chr2	235892853	235892986
chr1	90603343	90603457	ENSMUSG00000034432	Cops8	TRUE	TRUE	high_confidence	chr2	237085756	237085964	chr2_237085756_237085964|chr2_237085676_237086023	Conserved	chr2	237085751	237085868
chr1	90603343	90603457	ENSMUSG00000034432	Cops8	TRUE	TRUE	high_confidence	chr2	237085676	237086023	chr2_237085756_237085964|chr2_237085676_237086023	Conserved	chr2	237085751	237085868
chr1	90677794	90678006	ENSMUSG00000034432	Cops8	TRUE	TRUE	no_overlap	NA	NA	NA	NA	Conserved	NA	NA	NA
chr1	91024029	91024241	ENSMUSG00000026305	Lrrfip1	TRUE	FALSE	no_overlap	NA	NA	NA	NA	Conserved	NA	NA	NA
chr1	91056499	91056651	ENSMUSG00000026305	Lrrfip1	TRUE	TRUE	high_confidence	chr2	237694478	237694537	chr2_237694478_237694537|chr2_237694420_237694721	Conserved	chr2	237694807	237694893
chr1	91056499	91056651	ENSMUSG00000026305	Lrrfip1	TRUE	TRUE	high_confidence	chr2	237694420	237694721	chr2_237694478_237694537|chr2_237694420_237694721	Conserved	chr2	237694807	237694893
chr1	91057793	91057825	ENSMUSG00000026305	Lrrfip1	TRUE	TRUE	low_confidence	chr2	237695221	237695420	chr2_237695221_237695420	Conserved	chr2	237695279	237695313
chr1	91062574	91062723	ENSMUSG00000026305	Lrrfip1	TRUE	TRUE	low_confidence	chr2	237700710	237700956	chr2_237700710_237700956	Conserved	chr2	237700188	237700267
chr1	91093405	91093529	ENSMUSG00000026305	Lrrfip1	TRUE	TRUE	no_overlap	NA	NA	NA	NA	Conserved	chr2	237739079	237739199
chr1	91096610	91096759	ENSMUSG00000026305	Lrrfip1	TRUE	TRUE	no_overlap	NA	NA	NA	NA	Conserved	chr2	237743191	237743372
chr1	91193277	91193560	ENSMUSG00000034353	Ramp1	TRUE	TRUE	no_overlap	NA	NA	NA	NA	Alternate	chr2	237874636	237874948
chr1	91278485	91278588	ENSMUSG00000034343	Ube2f	FALSE	TRUE	no_overlap	NA	NA	NA	NA	Other	chr2	238030843	238030986
chr1	91286898	91287059	ENSMUSG00000034343	Ube2f	FALSE	TRUE	no_overlap	NA	NA	NA	NA	Other	chr2	238043182	238043381
chr1	91294104	91294244	ENSMUSG00000034343	Ube2f	FALSE	FALSE	no_overlap	NA	NA	NA	NA	Other	NA	NA	NA
chr1	91294318	91294399	ENSMUSG00000026307	Scly	TRUE	FALSE	no_overlap	NA	NA	NA	NA	Other	NA	NA	NA
chr1	91941645	91941797	ENSMUSG00000026313	Hdac4	TRUE	FALSE	no_overlap	NA	NA	NA	NA	Conserved	NA	NA	NA
chr1	91942830	91942961	ENSMUSG00000026313	Hdac4	TRUE	TRUE	no_overlap	NA	NA	NA	NA	Conserved	NA	NA	NA
chr1	92051125	92051328	ENSMUSG00000026313	Hdac4	TRUE	TRUE	no_overlap	NA	NA	NA	NA	Conserved	chr2	239226173	239226269
chr1	92064357	92064654	ENSMUSG00000026313	Hdac4	TRUE	TRUE	low_confidence	chr2	239247610	239247731	chr2_239247610_239247731	Conserved	chr2	239247489	239247761
chr1	92080265	92080460	ENSMUSG00000026313	Hdac4	TRUE	TRUE	high_confidence	chr2	239267442	239267718	chr2_239267442_239267718|chr2_239267355_239267758	Conserved	chr2	239267494	239267669
chr1	92080265	92080460	ENSMUSG00000026313	Hdac4	TRUE	TRUE	high_confidence	chr2	239267355	239267758	chr2_239267442_239267718|chr2_239267355_239267758	Conserved	chr2	239267494	239267669
chr1	92086993	92087220	ENSMUSG00000026313	Hdac4	TRUE	TRUE	high_confidence	chr2	239275201	239275472	chr2_239275201_239275472|chr2_239274466_239274591|chr2_239275035_239275620	Conserved	chr2	239275227	239275456
chr1	92086993	92087220	ENSMUSG00000026313	Hdac4	TRUE	TRUE	high_confidence	chr2	239274466	239274591	chr2_239275201_239275472|chr2_239274466_239274591|chr2_239275035_239275620	Conserved	chr2	239275227	239275456
chr1	92086993	92087220	ENSMUSG00000026313	Hdac4	TRUE	TRUE	high_confidence	chr2	239275035	239275620	chr2_239275201_239275472|chr2_239274466_239274591|chr2_239275035_239275620	Conserved	chr2	239275227	239275456
chr1	92119183	92119485	ENSMUSG00000026313	Hdac4	TRUE	FALSE	no_overlap	NA	NA	NA	NA	Conserved	NA	NA	NA
chr1	92799814	92799956	ENSMUSG00000034220	Gpc1	TRUE	FALSE	no_overlap	NA	NA	NA	NA	Other	NA	NA	NA
chr1	92806796	92807131	ENSMUSG00000034220	Gpc1	TRUE	FALSE	no_overlap	NA	NA	NA	NA	Other	NA	NA	NA
chr1	93173767	93173875	ENSMUSG00000084989	Crocc2	TRUE	TRUE	no_overlap	NA	NA	NA	NA	Other	chr2	240913368	240913476
chr1	93343524	93343638	ENSMUSG00000026275	Ppp1r7	FALSE	TRUE	low_confidence	chr2	241149396	241149709	chr2_241149396_241149709|chr2_241150219_241150627	Other	chr2	241150354	241150474
chr1	93343524	93343638	ENSMUSG00000026275	Ppp1r7	FALSE	TRUE	low_confidence	chr2	241150219	241150627	chr2_241149396_241149709|chr2_241150219_241150627	Other	chr2	241150354	241150474
chr1	93391605	93391812	ENSMUSG00000034107	Ano7	TRUE	TRUE	no_overlap	NA	NA	NA	NA	Other	chr2	241205086	241207371
chr1	93668904	93668976	ENSMUSG00000026278	Bok	TRUE	TRUE	no_overlap	NA	NA	NA	NA	Mm-Specific	NA	NA	NA
chr1	93754867	93754985	ENSMUSG00000026280	Atg4b	TRUE	TRUE	low_confidence	chr2	241637009	241637162	chr2_241637009_241637162|chr2_241637523_241637786	Other	chr2	241637464	241637651
chr1	93754867	93754985	ENSMUSG00000026280	Atg4b	TRUE	TRUE	low_confidence	chr2	241637523	241637786	chr2_241637009_241637162|chr2_241637523_241637786	Other	chr2	241637464	241637651
chr1	93803795	93803909	ENSMUSG00000026283	Ing5	TRUE	TRUE	low_confidence	chr2	241701689	241702112	chr2_241701689_241702112|chr2_241702318_241702413	Conserved	chr2	241701884	241701968
chr1	93803795	93803909	ENSMUSG00000026283	Ing5	TRUE	TRUE	low_confidence	chr2	241702318	241702413	chr2_241701689_241702112|chr2_241702318_241702413	Conserved	chr2	241701884	241701968
chr1	93825412	93825525	ENSMUSG00000073609	D2hgdh	TRUE	TRUE	no_overlap	NA	NA	NA	NA	Alternate	NA	NA	NA
chr1	94035009	94035130	ENSMUSG00000026285	Pdcd1	TRUE	TRUE	no_overlap	NA	NA	NA	NA	Conserved	NA	NA	NA
chr1	94035285	94035527	ENSMUSG00000026285	Pdcd1	TRUE	TRUE	no_overlap	NA	NA	NA	NA	Conserved	NA	NA	NA
chr1	94056019	94056217	ENSMUSG00000026285	Pdcd1	TRUE	TRUE	high_confidence	chr2	241863815	241863932	chr2_241863815_241863932|chr2_241863588_241863971	Conserved	NA	NA	NA
chr1	94056019	94056217	ENSMUSG00000026285	Pdcd1	TRUE	TRUE	high_confidence	chr2	241863588	241863971	chr2_241863815_241863932|chr2_241863588_241863971	Conserved	NA	NA	NA
chr1	94827810	94827919	ENSMUSG00000051185	Fam174a	TRUE	TRUE	no_overlap	NA	NA	NA	NA	Other	NA	NA	NA
chr1	95268211	95268384	ENSMUSG00000051185	Fam174a	TRUE	TRUE	no_overlap	NA	NA	NA	NA	Other	NA	NA	NA
chr1	95655590	95655824	ENSMUSG00000040710	St8sia4	TRUE	TRUE	high_confidence	chr5	100889220	100889425	chr5_100889220_100889425|chr5_100889183_100889481	Conserved	chr5	100889176	100889416
chr1	95655590	95655824	ENSMUSG00000040710	St8sia4	TRUE	TRUE	high_confidence	chr5	100889183	100889481	chr5_100889220_100889425|chr5_100889183_100889481	Conserved	chr5	100889176	100889416
chr1	95747411	95747546	ENSMUSG00000040710	St8sia4	TRUE	FALSE	no_overlap	NA	NA	NA	NA	Conserved	NA	NA	NA
chr1	97580324	97580469	ENSMUSG00000044768	D1Ertd622e	TRUE	FALSE	no_overlap	NA	NA	NA	NA	Other	NA	NA	NA
chr1	97659758	97659861	ENSMUSG00000044768	D1Ertd622e	TRUE	TRUE	no_overlap	NA	NA	NA	NA	Other	chr5	103260822	103260959
chr1	97746390	97746566	ENSMUSG00000040648	Ppip5k2	TRUE	TRUE	no_overlap	NA	NA	NA	NA	Other	chr5	103153756	103153964
chr1	97770077	97770185	ENSMUSG00000026333	Gin1	TRUE	TRUE	high_confidence	chr5	103120149	103120356	chr5_103120149_103120356|chr5_103120039_103120424|chr5_103119804_103119908	Other	chr5	103120132	103120258
chr1	97770077	97770185	ENSMUSG00000026333	Gin1	TRUE	TRUE	high_confidence	chr5	103120039	103120424	chr5_103120149_103120356|chr5_103120039_103120424|chr5_103119804_103119908	Other	chr5	103120132	103120258
chr1	97770077	97770185	ENSMUSG00000026333	Gin1	TRUE	TRUE	high_confidence	chr5	103119804	103119908	chr5_103120149_103120356|chr5_103120039_103120424|chr5_103119804_103119908	Other	chr5	103120132	103120258
chr1	105435173	105435276	ENSMUSG00000047496	Rnf152	TRUE	TRUE	no_overlap	NA	NA	NA	NA	Other	chr18	61960425	61960480
chr1	105990147	105990267	ENSMUSG00000038866	Zcchc2	TRUE	TRUE	high_confidence	chr18	62522780	62522943	chr18_62522780_62522943|chr18_62522318_62522531|chr18_62522580_62523267	Conserved	chr18	62522769	62522882
chr1	105990147	105990267	ENSMUSG00000038866	Zcchc2	TRUE	TRUE	high_confidence	chr18	62522318	62522531	chr18_62522780_62522943|chr18_62522318_62522531|chr18_62522580_62523267	Conserved	chr18	62522769	62522882
chr1	105990147	105990267	ENSMUSG00000038866	Zcchc2	TRUE	TRUE	high_confidence	chr18	62522580	62523267	chr18_62522780_62522943|chr18_62522318_62522531|chr18_62522580_62523267	Conserved	chr18	62522769	62522882
chr1	106321451	106321749	ENSMUSG00000044340	Phlpp1	TRUE	TRUE	no_overlap	NA	NA	NA	NA	Alternate	chr18	62875542	62876178
chr1	106323237	106323346	ENSMUSG00000044340	Phlpp1	TRUE	TRUE	no_overlap	NA	NA	NA	NA	Alternate	chr18	62877454	62877588
chr1	106325414	106325539	ENSMUSG00000044340	Phlpp1	TRUE	TRUE	no_overlap	NA	NA	NA	NA	Alternate	chr18	62880306	62880451
chr1	106352862	106352996	ENSMUSG00000044340	Phlpp1	TRUE	TRUE	no_overlap	NA	NA	NA	NA	Alternate	chr18	62925078	62925211
chr1	106511711	106511852	ENSMUSG00000057329	Bcl2	TRUE	TRUE	no_overlap	NA	NA	NA	NA	Conserved	chr18	63095429	63095628
chr1	106515666	106516021	ENSMUSG00000057329	Bcl2	TRUE	TRUE	high_confidence	chr18	63098621	63098939	chr18_63098621_63098939|chr18_63098083_63098272|chr18_63098366_63098960	Conserved	chr18	63098623	63098994
chr1	106515666	106516021	ENSMUSG00000057329	Bcl2	TRUE	TRUE	high_confidence	chr18	63098083	63098272	chr18_63098621_63098939|chr18_63098083_63098272|chr18_63098366_63098960	Conserved	chr18	63098623	63098994
chr1	106515666	106516021	ENSMUSG00000057329	Bcl2	TRUE	TRUE	high_confidence	chr18	63098366	63098960	chr18_63098621_63098939|chr18_63098083_63098272|chr18_63098366_63098960	Conserved	chr18	63098623	63098994
chr1	106567623	106567726	ENSMUSG00000057329	Bcl2	TRUE	TRUE	low_confidence	chr18	63158970	63159335	chr18_63158970_63159335|chr18_63159731_63159859	Conserved	chr18	63159065	63159169
chr1	106567623	106567726	ENSMUSG00000057329	Bcl2	TRUE	TRUE	low_confidence	chr18	63159731	63159859	chr18_63158970_63159335|chr18_63159731_63159859	Conserved	chr18	63159065	63159169
chr1	106569647	106569770	ENSMUSG00000057329	Bcl2	TRUE	TRUE	high_confidence	chr18	63161072	63161209	chr18_63161072_63161209|chr18_63161809_63162100|chr18_63160672_63160973|chr18_63161047_63161390|chr18_63161712_63162159	Conserved	chr18	63161061	63161196
chr1	106569647	106569770	ENSMUSG00000057329	Bcl2	TRUE	TRUE	high_confidence	chr18	63161809	63162100	chr18_63161072_63161209|chr18_63161809_63162100|chr18_63160672_63160973|chr18_63161047_63161390|chr18_63161712_63162159	Conserved	chr18	63161061	63161196
chr1	106569647	106569770	ENSMUSG00000057329	Bcl2	TRUE	TRUE	high_confidence	chr18	63160672	63160973	chr18_63161072_63161209|chr18_63161809_63162100|chr18_63160672_63160973|chr18_63161047_63161390|chr18_63161712_63162159	Conserved	chr18	63161061	63161196
chr1	106569647	106569770	ENSMUSG00000057329	Bcl2	TRUE	TRUE	high_confidence	chr18	63161047	63161390	chr18_63161072_63161209|chr18_63161809_63162100|chr18_63160672_63160973|chr18_63161047_63161390|chr18_63161712_63162159	Conserved	chr18	63161061	63161196
chr1	106569647	106569770	ENSMUSG00000057329	Bcl2	TRUE	TRUE	high_confidence	chr18	63161712	63162159	chr18_63161072_63161209|chr18_63161809_63162100|chr18_63160672_63160973|chr18_63161047_63161390|chr18_63161712_63162159	Conserved	chr18	63161061	63161196
chr1	106570415	106570659	ENSMUSG00000057329	Bcl2	TRUE	TRUE	high_confidence	chr18	63161072	63161209	chr18_63161072_63161209|chr18_63161809_63162100|chr18_63160672_63160973|chr18_63161047_63161390|chr18_63161712_63162159	Conserved	chr18	63161779	63162079
chr1	106570415	106570659	ENSMUSG00000057329	Bcl2	TRUE	TRUE	high_confidence	chr18	63161809	63162100	chr18_63161072_63161209|chr18_63161809_63162100|chr18_63160672_63160973|chr18_63161047_63161390|chr18_63161712_63162159	Conserved	chr18	63161779	63162079
chr1	106570415	106570659	ENSMUSG00000057329	Bcl2	TRUE	TRUE	high_confidence	chr18	63160672	63160973	chr18_63161072_63161209|chr18_63161809_63162100|chr18_63160672_63160973|chr18_63161047_63161390|chr18_63161712_63162159	Conserved	chr18	63161779	63162079
chr1	106570415	106570659	ENSMUSG00000057329	Bcl2	TRUE	TRUE	high_confidence	chr18	63161047	63161390	chr18_63161072_63161209|chr18_63161809_63162100|chr18_63160672_63160973|chr18_63161047_63161390|chr18_63161712_63162159	Conserved	chr18	63161779	63162079
chr1	106570415	106570659	ENSMUSG00000057329	Bcl2	TRUE	TRUE	high_confidence	chr18	63161712	63162159	chr18_63161072_63161209|chr18_63161809_63162100|chr18_63160672_63160973|chr18_63161047_63161390|chr18_63161712_63162159	Conserved	chr18	63161779	63162079
chr1	106581900	106582051	ENSMUSG00000057329	Bcl2	TRUE	TRUE	no_overlap	NA	NA	NA	NA	Conserved	chr18	63177905	63178095
chr1	106599604	106599705	ENSMUSG00000057329	Bcl2	TRUE	TRUE	low_confidence	chr18	63197328	63197476	chr18_63197328_63197476	Conserved	chr18	63197353	63197503
chr1	106600935	106601248	ENSMUSG00000057329	Bcl2	TRUE	TRUE	high_confidence	chr18	63200040	63200385	chr18_63200040_63200385|chr18_63199737_63200443	Conserved	chr18	63200091	63200404
chr1	106600935	106601248	ENSMUSG00000057329	Bcl2	TRUE	TRUE	high_confidence	chr18	63199737	63200443	chr18_63200040_63200385|chr18_63199737_63200443	Conserved	chr18	63200091	63200404
chr1	106612404	106612445	ENSMUSG00000057329	Bcl2	TRUE	TRUE	high_confidence	chr18	63213362	63213652	chr18_63213362_63213652|chr18_63212464_63212562|chr18_63213258_63213765	Conserved	chr18	63212939	63212984
chr1	106612404	106612445	ENSMUSG00000057329	Bcl2	TRUE	TRUE	high_confidence	chr18	63212464	63212562	chr18_63213362_63213652|chr18_63212464_63212562|chr18_63213258_63213765	Conserved	chr18	63212939	63212984
chr1	106612404	106612445	ENSMUSG00000057329	Bcl2	TRUE	TRUE	high_confidence	chr18	63213258	63213765	chr18_63213362_63213652|chr18_63212464_63212562|chr18_63213258_63213765	Conserved	chr18	63212939	63212984
chr1	106612715	106613024	ENSMUSG00000057329	Bcl2	TRUE	TRUE	high_confidence	chr18	63213362	63213652	chr18_63213362_63213652|chr18_63212464_63212562|chr18_63213258_63213765|chr18_63214359_63214549	Conserved	chr18	63213309	63213691
chr1	106612715	106613024	ENSMUSG00000057329	Bcl2	TRUE	TRUE	high_confidence	chr18	63212464	63212562	chr18_63213362_63213652|chr18_63212464_63212562|chr18_63213258_63213765|chr18_63214359_63214549	Conserved	chr18	63213309	63213691
chr1	106612715	106613024	ENSMUSG00000057329	Bcl2	TRUE	TRUE	high_confidence	chr18	63213258	63213765	chr18_63213362_63213652|chr18_63212464_63212562|chr18_63213258_63213765|chr18_63214359_63214549	Conserved	chr18	63213309	63213691
chr1	106612715	106613024	ENSMUSG00000057329	Bcl2	TRUE	TRUE	high_confidence	chr18	63214359	63214549	chr18_63213362_63213652|chr18_63212464_63212562|chr18_63213258_63213765|chr18_63214359_63214549	Conserved	chr18	63213309	63213691
chr1	106617103	106617353	ENSMUSG00000057329	Bcl2	TRUE	TRUE	high_confidence	chr18	63216604	63216818	chr18_63216604_63216818|chr18_63216896_63216998|chr18_63216436_63217074|chr18_63217155_63217299	Conserved	chr18	63217169	63217328
chr1	106617103	106617353	ENSMUSG00000057329	Bcl2	TRUE	TRUE	high_confidence	chr18	63216896	63216998	chr18_63216604_63216818|chr18_63216896_63216998|chr18_63216436_63217074|chr18_63217155_63217299	Conserved	chr18	63217169	63217328
chr1	106617103	106617353	ENSMUSG00000057329	Bcl2	TRUE	TRUE	high_confidence	chr18	63216436	63217074	chr18_63216604_63216818|chr18_63216896_63216998|chr18_63216436_63217074|chr18_63217155_63217299	Conserved	chr18	63217169	63217328
chr1	106617103	106617353	ENSMUSG00000057329	Bcl2	TRUE	TRUE	high_confidence	chr18	63217155	63217299	chr18_63216604_63216818|chr18_63216896_63216998|chr18_63216436_63217074|chr18_63217155_63217299	Conserved	chr18	63217169	63217328
chr1	106620670	106620832	ENSMUSG00000057329	Bcl2	TRUE	TRUE	high_confidence	chr18	63220963	63221217	chr18_63220963_63221217|chr18_63220919_63221267	Conserved	NA	NA	NA
chr1	106620670	106620832	ENSMUSG00000057329	Bcl2	TRUE	TRUE	high_confidence	chr18	63220919	63221267	chr18_63220963_63221217|chr18_63220919_63221267	Conserved	NA	NA	NA
chr1	106627250	106627422	ENSMUSG00000057329	Bcl2	TRUE	TRUE	no_overlap	NA	NA	NA	NA	Conserved	chr18	63236475	63236599
chr1	106647452	106647623	ENSMUSG00000057329	Bcl2	TRUE	TRUE	no_overlap	NA	NA	NA	NA	Conserved	chr18	63256206	63256690
chr1	106700658	106700736	ENSMUSG00000057329	Bcl2	TRUE	TRUE	no_overlap	NA	NA	NA	NA	Conserved	NA	NA	NA
chr1	106866833	106867100	ENSMUSG00000067006	Serpinb5	TRUE	TRUE	no_overlap	NA	NA	NA	NA	Mm-Specific	chr18	63480384	63480666
chr1	106868077	106868194	ENSMUSG00000067006	Serpinb5	TRUE	TRUE	no_overlap	NA	NA	NA	NA	Mm-Specific	chr18	63481554	63481681
chr1	113904027	113904278	ENSMUSG00000070695	Cntnap5a	FALSE	FALSE	no_overlap	NA	NA	NA	NA	Other	NA	NA	NA
chr1	118400066	118400169	ENSMUSG00000064302	Clasp1	TRUE	TRUE	no_overlap	NA	NA	NA	NA	Other	NA	NA	NA
chr1	119475288	119475435	ENSMUSG00000004451	Ralb	TRUE	TRUE	no_overlap	NA	NA	NA	NA	Other	NA	NA	NA
chr1	119476880	119477092	ENSMUSG00000004451	Ralb	TRUE	TRUE	low_confidence	chr2	120287263	120287445	chr2_120287263_120287445	Other	chr2	120287434	120287576
chr1	119487013	119487158	ENSMUSG00000004451	Ralb	TRUE	TRUE	no_overlap	NA	NA	NA	NA	Other	chr2	120274073	120274224
chr1	120055606	120055762	ENSMUSG00000026387	Sctr	TRUE	TRUE	no_overlap	NA	NA	NA	NA	Mm-Specific	chr2	119448425	119448540
chr1	120136238	120136342	ENSMUSG00000026388	3110009E18Rik	TRUE	TRUE	no_overlap	NA	NA	NA	NA	Other	NA	NA	NA
chr1	120136398	120136480	ENSMUSG00000026388	3110009E18Rik	TRUE	TRUE	no_overlap	NA	NA	NA	NA	Other	NA	NA	NA
chr1	120197325	120197475	ENSMUSG00000026388	3110009E18Rik	TRUE	TRUE	no_overlap	NA	NA	NA	NA	Other	chr2	119290944	119291117
chr1	121327797	121328085	ENSMUSG00000003721	Insig2	TRUE	TRUE	low_confidence	chr2	118089357	118089499	chr2_118089357_118089499	Other	chr2	118088161	118088448
chr1	125390340	125390443	ENSMUSG00000026341	Actr3	TRUE	TRUE	no_overlap	NA	NA	NA	NA	Conserved	NA	NA	NA
chr1	125434741	125434962	ENSMUSG00000026341	Actr3	TRUE	TRUE	high_confidence	chr2	113889762	113890145	chr2_113889762_113890145|chr2_113889610_113890239	Conserved	chr2	113890782	113891001
chr1	125434741	125434962	ENSMUSG00000026341	Actr3	TRUE	TRUE	high_confidence	chr2	113889610	113890239	chr2_113889762_113890145|chr2_113889610_113890239	Conserved	chr2	113890782	113891001
chr1	125435798	125436027	ENSMUSG00000026341	Actr3	TRUE	TRUE	high_confidence	chr2	113889762	113890145	chr2_113889762_113890145|chr2_113889610_113890239	Conserved	chr2	113889770	113889848
chr1	125435798	125436027	ENSMUSG00000026341	Actr3	TRUE	TRUE	high_confidence	chr2	113889610	113890239	chr2_113889762_113890145|chr2_113889610_113890239	Conserved	chr2	113889770	113889848
chr1	125467938	125468073	ENSMUSG00000026341	Actr3	TRUE	TRUE	no_overlap	NA	NA	NA	NA	Conserved	NA	NA	NA
chr1	125504042	125504228	ENSMUSG00000026342	Slc35f5	TRUE	FALSE	no_overlap	NA	NA	NA	NA	Other	NA	NA	NA
chr1	126747120	126747223	ENSMUSG00000049690	Nckap5	TRUE	TRUE	no_overlap	NA	NA	NA	NA	Mm-Specific	NA	NA	NA
chr1	126748034	126748199	ENSMUSG00000049690	Nckap5	TRUE	TRUE	no_overlap	NA	NA	NA	NA	Mm-Specific	chr2	133576851	133577038
chr1	126817789	126818058	ENSMUSG00000049690	Nckap5	TRUE	TRUE	no_overlap	NA	NA	NA	NA	Mm-Specific	chr2	133658061	133658335
chr1	127233040	127233489	ENSMUSG00000036155	Mgat5	TRUE	TRUE	no_overlap	NA	NA	NA	NA	Conserved	NA	NA	NA
chr1	127240042	127240261	ENSMUSG00000036155	Mgat5	TRUE	TRUE	no_overlap	NA	NA	NA	NA	Conserved	chr2	134161285	134161472
chr1	127242255	127242488	ENSMUSG00000036155	Mgat5	TRUE	TRUE	no_overlap	NA	NA	NA	NA	Conserved	NA	NA	NA
chr1	127296916	127297109	ENSMUSG00000036155	Mgat5	TRUE	TRUE	no_overlap	NA	NA	NA	NA	Conserved	chr2	134242014	134242196
chr1	127303827	127304069	ENSMUSG00000036155	Mgat5	TRUE	TRUE	low_confidence	chr2	134251002	134251151	chr2_134251002_134251151	Conserved	NA	NA	NA
chr1	127305639	127305918	ENSMUSG00000036155	Mgat5	TRUE	TRUE	low_confidence	chr2	134253334	134253687	chr2_134253334_134253687	Conserved	chr2	134253405	134253651
chr1	127345035	127345285	ENSMUSG00000036155	Mgat5	TRUE	TRUE	high_confidence	chr2	134288854	134289071	chr2_134288854_134289071|chr2_134290331_134290506|chr2_134288670_134289161|chr2_134289381_134289503|chr2_134290288_134290687	Conserved	chr2	134290294	134290573
chr1	127345035	127345285	ENSMUSG00000036155	Mgat5	TRUE	TRUE	high_confidence	chr2	134290331	134290506	chr2_134288854_134289071|chr2_134290331_134290506|chr2_134288670_134289161|chr2_134289381_134289503|chr2_134290288_134290687	Conserved	chr2	134290294	134290573
chr1	127345035	127345285	ENSMUSG00000036155	Mgat5	TRUE	TRUE	high_confidence	chr2	134288670	134289161	chr2_134288854_134289071|chr2_134290331_134290506|chr2_134288670_134289161|chr2_134289381_134289503|chr2_134290288_134290687	Conserved	chr2	134290294	134290573
chr1	127345035	127345285	ENSMUSG00000036155	Mgat5	TRUE	TRUE	high_confidence	chr2	134289381	134289503	chr2_134288854_134289071|chr2_134290331_134290506|chr2_134288670_134289161|chr2_134289381_134289503|chr2_134290288_134290687	Conserved	chr2	134290294	134290573
chr1	127345035	127345285	ENSMUSG00000036155	Mgat5	TRUE	TRUE	high_confidence	chr2	134290288	134290687	chr2_134288854_134289071|chr2_134290331_134290506|chr2_134288670_134289161|chr2_134289381_134289503|chr2_134290288_134290687	Conserved	chr2	134290294	134290573
chr1	127348961	127349067	ENSMUSG00000036155	Mgat5	TRUE	TRUE	no_overlap	NA	NA	NA	NA	Conserved	chr2	134295874	134295988
chr1	127626736	127626898	ENSMUSG00000026347	Tmem163	TRUE	TRUE	high_confidence	chr2	134668957	134669155	chr2_134668957_134669155|chr2_134670414_134670624|chr2_134668835_134669214|chr2_134670334_134670707	Conserved	NA	NA	NA
chr1	127626736	127626898	ENSMUSG00000026347	Tmem163	TRUE	TRUE	high_confidence	chr2	134670414	134670624	chr2_134668957_134669155|chr2_134670414_134670624|chr2_134668835_134669214|chr2_134670334_134670707	Conserved	NA	NA	NA
chr1	127626736	127626898	ENSMUSG00000026347	Tmem163	TRUE	TRUE	high_confidence	chr2	134668835	134669214	chr2_134668957_134669155|chr2_134670414_134670624|chr2_134668835_134669214|chr2_134670334_134670707	Conserved	NA	NA	NA
chr1	127626736	127626898	ENSMUSG00000026347	Tmem163	TRUE	TRUE	high_confidence	chr2	134670334	134670707	chr2_134668957_134669155|chr2_134670414_134670624|chr2_134668835_134669214|chr2_134670334_134670707	Conserved	NA	NA	NA
chr1	127627491	127627648	ENSMUSG00000026347	Tmem163	TRUE	TRUE	high_confidence	chr2	134670414	134670624	chr2_134670414_134670624|chr2_134670334_134670707	Conserved	chr2	134670440	134670562
chr1	127627491	127627648	ENSMUSG00000026347	Tmem163	TRUE	TRUE	high_confidence	chr2	134670334	134670707	chr2_134670414_134670624|chr2_134670334_134670707	Conserved	chr2	134670440	134670562
chr1	127638047	127638205	ENSMUSG00000026347	Tmem163	TRUE	TRUE	low_confidence	chr2	134677057	134677319	chr2_134677057_134677319	Conserved	chr2	134677206	134677376
chr1	127796412	127796815	ENSMUSG00000026349	Ccnt2	TRUE	TRUE	no_overlap	NA	NA	NA	NA	Other	chr2	134944659	134945039
chr1	127812980	127813181	ENSMUSG00000051590	Map3k19	TRUE	FALSE	no_overlap	NA	NA	NA	NA	Other	NA	NA	NA
chr1	128245083	128245186	ENSMUSG00000026353	Ubxn4	TRUE	TRUE	high_confidence	chr2	135741552	135741690	chr2_135741552_135741690|chr2_135741444_135741965|chr2_135742606_135742748	Conserved	chr2	135742595	135742718
chr1	128245083	128245186	ENSMUSG00000026353	Ubxn4	TRUE	TRUE	high_confidence	chr2	135741444	135741965	chr2_135741552_135741690|chr2_135741444_135741965|chr2_135742606_135742748	Conserved	chr2	135742595	135742718
chr1	128245083	128245186	ENSMUSG00000026353	Ubxn4	TRUE	TRUE	high_confidence	chr2	135742606	135742748	chr2_135741552_135741690|chr2_135741444_135741965|chr2_135742606_135742748	Conserved	chr2	135742595	135742718
chr1	128357599	128357754	ENSMUSG00000026355	Mcm6	TRUE	TRUE	no_overlap	NA	NA	NA	NA	Other	NA	NA	NA
chr1	128447163	128447485	ENSMUSG00000026356	Dars	TRUE	TRUE	high_confidence	chr2	136008175	136008490	chr2_136008175_136008490|chr2_136008577_136008746|chr2_136007992_136008779	Conserved	chr2	136008237	136008478
chr1	128447163	128447485	ENSMUSG00000026356	Dars	TRUE	TRUE	high_confidence	chr2	136008577	136008746	chr2_136008175_136008490|chr2_136008577_136008746|chr2_136007992_136008779	Conserved	chr2	136008237	136008478
chr1	128447163	128447485	ENSMUSG00000026356	Dars	TRUE	TRUE	high_confidence	chr2	136007992	136008779	chr2_136008175_136008490|chr2_136008577_136008746|chr2_136007992_136008779	Conserved	chr2	136008237	136008478
chr1	128548692	128549046	ENSMUSG00000045382	Cxcr4	TRUE	TRUE	no_overlap	NA	NA	NA	NA	Conserved	NA	NA	NA
chr1	128549083	128549285	ENSMUSG00000045382	Cxcr4	TRUE	TRUE	no_overlap	NA	NA	NA	NA	Conserved	NA	NA	NA
chr1	128605921	128606071	ENSMUSG00000045382	Cxcr4	TRUE	TRUE	high_confidence	chr2	136129695	136129876	chr2_136129695_136129876|chr2_136129606_136129953	Conserved	chr2	136129673	136129824
chr1	128605921	128606071	ENSMUSG00000045382	Cxcr4	TRUE	TRUE	high_confidence	chr2	136129606	136129953	chr2_136129695_136129876|chr2_136129606_136129953	Conserved	chr2	136129673	136129824
chr1	128611839	128612118	ENSMUSG00000045382	Cxcr4	TRUE	TRUE	low_confidence	chr2	136134081	136134450	chr2_136134081_136134450	Conserved	chr2	136134174	136134458
chr1	128615602	128615702	ENSMUSG00000045382	Cxcr4	TRUE	TRUE	high_confidence	chr2	136136221	136136448	chr2_136136221_136136448|chr2_136136628_136136793|chr2_136136193_136136881	Conserved	chr2	136136963	136137020
chr1	128615602	128615702	ENSMUSG00000045382	Cxcr4	TRUE	TRUE	high_confidence	chr2	136136628	136136793	chr2_136136221_136136448|chr2_136136628_136136793|chr2_136136193_136136881	Conserved	chr2	136136963	136137020
chr1	128615602	128615702	ENSMUSG00000045382	Cxcr4	TRUE	TRUE	high_confidence	chr2	136136193	136136881	chr2_136136221_136136448|chr2_136136628_136136793|chr2_136136193_136136881	Conserved	chr2	136136963	136137020
chr1	128672463	128672632	ENSMUSG00000045382	Cxcr4	TRUE	TRUE	no_overlap	NA	NA	NA	NA	Conserved	chr2	136210034	136210194
chr1	128766905	128767312	ENSMUSG00000045382	Cxcr4	TRUE	TRUE	low_confidence	chr2	136310102	136310381	chr2_136310102_136310381|chr2_136311264_136311473	Conserved	chr2	136311067	136311459
chr1	128766905	128767312	ENSMUSG00000045382	Cxcr4	TRUE	TRUE	low_confidence	chr2	136311264	136311473	chr2_136310102_136310381|chr2_136311264_136311473	Conserved	chr2	136311067	136311459
chr1	128770917	128771021	ENSMUSG00000045382	Cxcr4	TRUE	TRUE	no_overlap	NA	NA	NA	NA	Conserved	chr2	136316149	136316149
chr1	128786965	128787142	ENSMUSG00000045382	Cxcr4	TRUE	TRUE	low_confidence	chr2	136327137	136327811	chr2_136327137_136327811	Conserved	chr2	136327142	136327327
chr1	128787298	128787618	ENSMUSG00000045382	Cxcr4	TRUE	TRUE	low_confidence	chr2	136327137	136327811	chr2_136327137_136327811	Conserved	chr2	136327504	136327818
chr1	128808735	128808935	ENSMUSG00000045382	Cxcr4	TRUE	TRUE	no_overlap	NA	NA	NA	NA	Conserved	chr2	136359631	136359866
chr1	128830664	128830998	ENSMUSG00000045382	Cxcr4	TRUE	TRUE	no_overlap	NA	NA	NA	NA	Conserved	NA	NA	NA
chr1	130475107	130475199	ENSMUSG00000026399	Cd55	FALSE	FALSE	no_overlap	NA	NA	NA	NA	Other	NA	NA	NA
chr1	130716052	130716167	ENSMUSG00000026409	Pfkfb2	FALSE	TRUE	low_confidence	chr1	207053033	207053344	chr1_207053033_207053344|chr1_207052917_207053016	Other	chr1	207052894	207053011
chr1	130716052	130716167	ENSMUSG00000026409	Pfkfb2	FALSE	TRUE	low_confidence	chr1	207052917	207053016	chr1_207053033_207053344|chr1_207052917_207053016	Other	chr1	207052894	207053011
chr1	130717417	130717556	ENSMUSG00000046404	Yod1	TRUE	TRUE	high_confidence	chr1	207051053	207051132	chr1_207051053_207051132|chr1_207050972_207051201|chr1_207049993_207050133	Conserved	chr1	207050955	207051088
chr1	130717417	130717556	ENSMUSG00000046404	Yod1	TRUE	TRUE	high_confidence	chr1	207050972	207051201	chr1_207051053_207051132|chr1_207050972_207051201|chr1_207049993_207050133	Conserved	chr1	207050955	207051088
chr1	130717417	130717556	ENSMUSG00000046404	Yod1	TRUE	TRUE	high_confidence	chr1	207049993	207050133	chr1_207051053_207051132|chr1_207050972_207051201|chr1_207049993_207050133	Conserved	chr1	207050955	207051088
chr1	130886584	130886728	ENSMUSG00000026420	Il24	TRUE	TRUE	no_overlap	NA	NA	NA	NA	Other	chr1	206898546	206898693
chr1	130886773	130886884	ENSMUSG00000026420	Il24	TRUE	TRUE	no_overlap	NA	NA	NA	NA	Other	chr1	206898331	206898496
chr1	130902482	130902847	ENSMUSG00000026416	Il20	TRUE	TRUE	no_overlap	NA	NA	NA	NA	Other	chr1	206873589	206873967
chr1	130993790	130994048	ENSMUSG00000016529	Il10	TRUE	TRUE	low_confidence	chr1	206803181	206803697	chr1_206803181_206803697	Conserved	chr1	206803262	206803521
chr1	130996420	130996687	ENSMUSG00000016529	Il10	TRUE	TRUE	low_confidence	chr1	206798608	206798968	chr1_206798608_206798968|chr1_206798232_206798358	Conserved	chr1	206798622	206798900
chr1	130996420	130996687	ENSMUSG00000016529	Il10	TRUE	TRUE	low_confidence	chr1	206798232	206798358	chr1_206798608_206798968|chr1_206798232_206798358	Conserved	chr1	206798622	206798900
chr1	131010568	131010812	ENSMUSG00000016529	Il10	TRUE	TRUE	high_confidence	chr1	206784440	206784770	chr1_206784440_206784770|chr1_206784384_206784900	Conserved	chr1	206784468	206784729
chr1	131010568	131010812	ENSMUSG00000016529	Il10	TRUE	TRUE	high_confidence	chr1	206784384	206784900	chr1_206784440_206784770|chr1_206784384_206784900	Conserved	chr1	206784468	206784729
chr1	131022638	131023085	ENSMUSG00000016529	Il10	TRUE	TRUE	high_confidence	chr1	206769484	206769670	chr1_206769484_206769670|chr1_206769077_206769750	Conserved	chr1	206769221	206769720
chr1	131022638	131023085	ENSMUSG00000016529	Il10	TRUE	TRUE	high_confidence	chr1	206769077	206769750	chr1_206769484_206769670|chr1_206769077_206769750	Conserved	chr1	206769221	206769720
chr1	131025902	131026170	ENSMUSG00000016529	Il10	TRUE	TRUE	high_confidence	chr1	206766375	206766698	chr1_206766375_206766698|chr1_206766306_206766738	Conserved	chr1	206766402	206766638
chr1	131025902	131026170	ENSMUSG00000016529	Il10	TRUE	TRUE	high_confidence	chr1	206766306	206766738	chr1_206766375_206766698|chr1_206766306_206766738	Conserved	chr1	206766402	206766638
chr1	131038267	131038448	ENSMUSG00000016529	Il10	TRUE	TRUE	no_overlap	NA	NA	NA	NA	Conserved	chr1	206749900	206750069
chr1	131049328	131049634	ENSMUSG00000016528	Mapkapk2	TRUE	TRUE	low_confidence	chr1	206739614	206739981	chr1_206739614_206739981	Other	chr1	206739590	206739956
chr1	131080825	131081002	ENSMUSG00000016528	Mapkapk2	TRUE	TRUE	low_confidence	chr1	206704397	206704526	chr1_206704397_206704526|chr1_206703689_206703986	Other	chr1	206703710	206703891
chr1	131080825	131081002	ENSMUSG00000016528	Mapkapk2	TRUE	TRUE	low_confidence	chr1	206703689	206703986	chr1_206704397_206704526|chr1_206703689_206703986	Other	chr1	206703710	206703891
chr1	131126044	131126119	ENSMUSG00000016526	Dyrk3	TRUE	TRUE	no_overlap	NA	NA	NA	NA	Other	chr1	206652566	206652643
chr1	131135236	131135418	ENSMUSG00000016526	Dyrk3	TRUE	TRUE	no_overlap	NA	NA	NA	NA	Other	chr1	206638595	206638781
chr1	131142743	131142844	ENSMUSG00000016526	Dyrk3	TRUE	FALSE	no_overlap	NA	NA	NA	NA	Other	NA	NA	NA
chr1	131184427	131184539	ENSMUSG00000026430	Rassf5	TRUE	TRUE	high_confidence	chr1	206580030	206580238	chr1_206580030_206580238|chr1_206579930_206580333	Conserved	chr1	206580179	206580280
chr1	131184427	131184539	ENSMUSG00000026430	Rassf5	TRUE	TRUE	high_confidence	chr1	206579930	206580333	chr1_206580030_206580238|chr1_206579930_206580333	Conserved	chr1	206580179	206580280
chr1	131186227	131186407	ENSMUSG00000026430	Rassf5	TRUE	TRUE	low_confidence	chr1	206578342	206578620	chr1_206578342_206578620	Conserved	chr1	206578301	206578496
chr1	131200111	131200346	ENSMUSG00000026430	Rassf5	TRUE	TRUE	high_confidence	chr1	206557025	206557369	chr1_206557025_206557369|chr1_206556817_206556933|chr1_206556760_206557410|chr1_206556216_206556322	Conserved	chr1	206557106	206557353
chr1	131200111	131200346	ENSMUSG00000026430	Rassf5	TRUE	TRUE	high_confidence	chr1	206556817	206556933	chr1_206557025_206557369|chr1_206556817_206556933|chr1_206556760_206557410|chr1_206556216_206556322	Conserved	chr1	206557106	206557353
chr1	131200111	131200346	ENSMUSG00000026430	Rassf5	TRUE	TRUE	high_confidence	chr1	206556760	206557410	chr1_206557025_206557369|chr1_206556817_206556933|chr1_206556760_206557410|chr1_206556216_206556322	Conserved	chr1	206557106	206557353
chr1	131200111	131200346	ENSMUSG00000026430	Rassf5	TRUE	TRUE	high_confidence	chr1	206556216	206556322	chr1_206557025_206557369|chr1_206556817_206556933|chr1_206556760_206557410|chr1_206556216_206556322	Conserved	chr1	206557106	206557353
chr1	131246545	131246654	ENSMUSG00000026430	Rassf5	TRUE	TRUE	low_confidence	chr1	206506842	206507178	chr1_206506842_206507178	Conserved	chr1	206506108	206506169
chr1	131280383	131280492	ENSMUSG00000042349	Ikbke	TRUE	TRUE	high_confidence	chr1	206470366	206470498	chr1_206470366_206470498|chr1_206470275_206470566|chr1_206469445_206469740	Conserved	chr1	206469464	206469578
chr1	131280383	131280492	ENSMUSG00000042349	Ikbke	TRUE	TRUE	high_confidence	chr1	206470275	206470566	chr1_206470366_206470498|chr1_206470275_206470566|chr1_206469445_206469740	Conserved	chr1	206469464	206469578
chr1	131280383	131280492	ENSMUSG00000042349	Ikbke	TRUE	TRUE	high_confidence	chr1	206469445	206469740	chr1_206470366_206470498|chr1_206470275_206470566|chr1_206469445_206469740	Conserved	chr1	206469464	206469578
chr1	131379261	131379311	ENSMUSG00000026425	Srgap2	FALSE	TRUE	low_confidence	chr1	206381356	206381531	chr1_206381356_206381531|chr1_206380756_206381045|chr1_206380293_206380507	Other	chr1	206380372	206380422
chr1	131379261	131379311	ENSMUSG00000026425	Srgap2	FALSE	TRUE	low_confidence	chr1	206380756	206381045	chr1_206381356_206381531|chr1_206380756_206381045|chr1_206380293_206380507	Other	chr1	206380372	206380422
chr1	131379261	131379311	ENSMUSG00000026425	Srgap2	FALSE	TRUE	low_confidence	chr1	206380293	206380507	chr1_206381356_206381531|chr1_206380756_206381045|chr1_206380293_206380507	Other	chr1	206380372	206380422
chr1	131384568	131384703	ENSMUSG00000026425	Srgap2	FALSE	TRUE	no_overlap	NA	NA	NA	NA	Other	chr1	206374882	206375029
chr1	131533925	131534131	ENSMUSG00000055184	Fam72a	FALSE	TRUE	no_overlap	NA	NA	NA	NA	Other	chr1	206195534	206195760
chr1	131573761	131574029	ENSMUSG00000026432	Avpr1b	TRUE	TRUE	no_overlap	NA	NA	NA	NA	Other	NA	NA	NA
chr1	131638258	131638370	ENSMUSG00000004552	Ctse	TRUE	TRUE	no_overlap	NA	NA	NA	NA	Other	chr1	206046778	206046886
chr1	131747102	131747260	ENSMUSG00000042268	Slc26a9	TRUE	TRUE	no_overlap	NA	NA	NA	NA	Other	chr1	205939562	205939667
chr1	131827975	131828104	ENSMUSG00000013275	Slc41a1	TRUE	TRUE	low_confidence	chr1	205812990	205813450	chr1_205812990_205813450	Other	chr1	205813095	205813228
chr1	131867155	131867258	ENSMUSG00000026433	Rab29	TRUE	TRUE	high_confidence	chr1	205775071	205775543	chr1_205775071_205775543|chr1_205775013_205775583|chr1_205774210_205774495	Conserved	chr1	205775427	205775529
chr1	131867155	131867258	ENSMUSG00000026433	Rab29	TRUE	TRUE	high_confidence	chr1	205775013	205775583	chr1_205775071_205775543|chr1_205775013_205775583|chr1_205774210_205774495	Conserved	chr1	205775427	205775529
chr1	131867155	131867258	ENSMUSG00000026433	Rab29	TRUE	TRUE	high_confidence	chr1	205774210	205774495	chr1_205775071_205775543|chr1_205775013_205775583|chr1_205774210_205774495	Conserved	chr1	205775427	205775529
chr1	131993304	131993410	ENSMUSG00000026435	Slc45a3	TRUE	TRUE	no_overlap	NA	NA	NA	NA	Other	NA	NA	NA
chr1	132008200	132008381	ENSMUSG00000026436	Elk4	TRUE	TRUE	high_confidence	chr1	205631953	205632183	chr1_205631953_205632183|chr1_205631199_205631469|chr1_205631880_205632281|chr1_205631099_205631591	Conserved	chr1	205631212	205631404
chr1	132008200	132008381	ENSMUSG00000026436	Elk4	TRUE	TRUE	high_confidence	chr1	205631199	205631469	chr1_205631953_205632183|chr1_205631199_205631469|chr1_205631880_205632281|chr1_205631099_205631591	Conserved	chr1	205631212	205631404
chr1	132008200	132008381	ENSMUSG00000026436	Elk4	TRUE	TRUE	high_confidence	chr1	205631880	205632281	chr1_205631953_205632183|chr1_205631199_205631469|chr1_205631880_205632281|chr1_205631099_205631591	Conserved	chr1	205631212	205631404
chr1	132008200	132008381	ENSMUSG00000026436	Elk4	TRUE	TRUE	high_confidence	chr1	205631099	205631591	chr1_205631953_205632183|chr1_205631199_205631469|chr1_205631880_205632281|chr1_205631099_205631591	Conserved	chr1	205631212	205631404
chr1	132010546	132010995	ENSMUSG00000026436	Elk4	TRUE	TRUE	no_overlap	NA	NA	NA	NA	Conserved	chr1	205627531	205628019
chr1	132011849	132011999	ENSMUSG00000026436	Elk4	TRUE	TRUE	no_overlap	NA	NA	NA	NA	Conserved	NA	NA	NA
chr1	132264714	132264826	ENSMUSG00000079330	Lemd1	TRUE	FALSE	no_overlap	NA	NA	NA	NA	Other	NA	NA	NA
chr1	132341822	132341971	ENSMUSG00000009772	Nuak2	TRUE	TRUE	high_confidence	chr1	205288210	205288579	chr1_205288210_205288579|chr1_205288186_205288777	Conserved	chr1	205288346	205288485
chr1	132341822	132341971	ENSMUSG00000009772	Nuak2	TRUE	TRUE	high_confidence	chr1	205288186	205288777	chr1_205288210_205288579|chr1_205288186_205288777	Conserved	chr1	205288346	205288485
chr1	133130728	133130884	ENSMUSG00000046062	Ppp1r15b	TRUE	TRUE	high_confidence	chr1	204411805	204411979	chr1_204411805_204411979|chr1_204411692_204412118	Conserved	NA	NA	NA
chr1	133130728	133130884	ENSMUSG00000046062	Ppp1r15b	TRUE	TRUE	high_confidence	chr1	204411692	204412118	chr1_204411805_204411979|chr1_204411692_204412118	Conserved	NA	NA	NA
chr1	133188808	133189049	ENSMUSG00000041757	Plekha6	TRUE	TRUE	no_overlap	NA	NA	NA	NA	Other	NA	NA	NA
chr1	133661350	133661518	ENSMUSG00000116275	Zc3h11a	FALSE	TRUE	high_confidence	chr1	203795541	203795654	chr1_203795541_203795654|chr1_203796051_203796160|chr1_203795406_203795720	Other	chr1	203795510	203795678
chr1	133661350	133661518	ENSMUSG00000116275	Zc3h11a	FALSE	TRUE	high_confidence	chr1	203796051	203796160	chr1_203795541_203795654|chr1_203796051_203796160|chr1_203795406_203795720	Other	chr1	203795510	203795678
chr1	133661350	133661518	ENSMUSG00000116275	Zc3h11a	FALSE	TRUE	high_confidence	chr1	203795406	203795720	chr1_203795541_203795654|chr1_203796051_203796160|chr1_203795406_203795720	Other	chr1	203795510	203795678
chr1	133689959	133690244	ENSMUSG00000051998	Lax1	TRUE	TRUE	high_confidence	chr1	203764981	203765295	chr1_203764981_203765295|chr1_203764917_203765362	Conserved	chr1	203764991	203765292
chr1	133689959	133690244	ENSMUSG00000051998	Lax1	TRUE	TRUE	high_confidence	chr1	203764917	203765362	chr1_203764981_203765295|chr1_203764917_203765362	Conserved	chr1	203764991	203765292
chr1	133797853	133798234	ENSMUSG00000026463	Atp2b4	TRUE	TRUE	low_confidence	chr1	203629943	203630188	chr1_203629943_203630188|chr1_203629527_203629777	Conserved	chr1	203629917	203630201
chr1	133797853	133798234	ENSMUSG00000026463	Atp2b4	TRUE	TRUE	low_confidence	chr1	203629527	203629777	chr1_203629943_203630188|chr1_203629527_203629777	Conserved	chr1	203629917	203630201
chr1	133801041	133801115	ENSMUSG00000026463	Atp2b4	TRUE	TRUE	high_confidence	chr1	203626413	203626804	chr1_203626413_203626804|chr1_203625712_203625919|chr1_203626397_203626878|chr1_203625672_203626026	Conserved	chr1	203626724	203626800
chr1	133801041	133801115	ENSMUSG00000026463	Atp2b4	TRUE	TRUE	high_confidence	chr1	203625712	203625919	chr1_203626413_203626804|chr1_203625712_203625919|chr1_203626397_203626878|chr1_203625672_203626026	Conserved	chr1	203626724	203626800
chr1	133801041	133801115	ENSMUSG00000026463	Atp2b4	TRUE	TRUE	high_confidence	chr1	203626397	203626878	chr1_203626413_203626804|chr1_203625712_203625919|chr1_203626397_203626878|chr1_203625672_203626026	Conserved	chr1	203626724	203626800
chr1	133801041	133801115	ENSMUSG00000026463	Atp2b4	TRUE	TRUE	high_confidence	chr1	203625672	203626026	chr1_203626413_203626804|chr1_203625712_203625919|chr1_203626397_203626878|chr1_203625672_203626026	Conserved	chr1	203626724	203626800
chr1	133815837	133815966	ENSMUSG00000026463	Atp2b4	TRUE	TRUE	high_confidence	chr1	203607309	203607539	chr1_203607309_203607539|chr1_203607256_203607629	Conserved	chr1	203607349	203607471
chr1	133815837	133815966	ENSMUSG00000026463	Atp2b4	TRUE	TRUE	high_confidence	chr1	203607256	203607629	chr1_203607309_203607539|chr1_203607256_203607629	Conserved	chr1	203607349	203607471
chr1	133841724	133841918	ENSMUSG00000026463	Atp2b4	TRUE	TRUE	no_overlap	NA	NA	NA	NA	Conserved	chr1	203572931	203572933
chr1	134059844	134059973	ENSMUSG00000041559	Fmod	TRUE	TRUE	low_confidence	chr1	203327776	203328140	chr1_203327776_203328140|chr1_203327204_203327699	Other	chr1	203328187	203328316
chr1	134059844	134059973	ENSMUSG00000041559	Fmod	TRUE	TRUE	low_confidence	chr1	203327204	203327699	chr1_203327776_203328140|chr1_203327204_203327699	Other	chr1	203328187	203328316
chr1	134063861	134063957	ENSMUSG00000020423	Btg2	TRUE	TRUE	high_confidence	chr1	203325209	203325299	chr1_203325209_203325299|chr1_203325080_203325468|chr1_203324112_203324490	Conserved	chr1	203324380	203324539
chr1	134063861	134063957	ENSMUSG00000020423	Btg2	TRUE	TRUE	high_confidence	chr1	203325080	203325468	chr1_203325209_203325299|chr1_203325080_203325468|chr1_203324112_203324490	Conserved	chr1	203324380	203324539
chr1	134063861	134063957	ENSMUSG00000020423	Btg2	TRUE	TRUE	high_confidence	chr1	203324112	203324490	chr1_203325209_203325299|chr1_203325080_203325468|chr1_203324112_203324490	Conserved	chr1	203324380	203324539
chr1	134065545	134065734	ENSMUSG00000020423	Btg2	TRUE	TRUE	no_overlap	NA	NA	NA	NA	Conserved	chr1	203322579	203322719
chr1	134083059	134083236	ENSMUSG00000020423	Btg2	TRUE	TRUE	no_overlap	NA	NA	NA	NA	Conserved	chr1	203300862	203301023
chr1	134093028	134093383	ENSMUSG00000020423	Btg2	TRUE	TRUE	high_confidence	chr1	203290428	203290710	chr1_203290428_203290710|chr1_203289533_203289844|chr1_203290294_203290742|chr1_203289473_203289916	Conserved	chr1	203290555	203290811
chr1	134093028	134093383	ENSMUSG00000020423	Btg2	TRUE	TRUE	high_confidence	chr1	203289533	203289844	chr1_203290428_203290710|chr1_203289533_203289844|chr1_203290294_203290742|chr1_203289473_203289916	Conserved	chr1	203290555	203290811
chr1	134093028	134093383	ENSMUSG00000020423	Btg2	TRUE	TRUE	high_confidence	chr1	203290294	203290742	chr1_203290428_203290710|chr1_203289533_203289844|chr1_203290294_203290742|chr1_203289473_203289916	Conserved	chr1	203290555	203290811
chr1	134093028	134093383	ENSMUSG00000020423	Btg2	TRUE	TRUE	high_confidence	chr1	203289473	203289916	chr1_203290428_203290710|chr1_203289533_203289844|chr1_203290294_203290742|chr1_203289473_203289916	Conserved	chr1	203290555	203290811
chr1	134111119	134111281	ENSMUSG00000026450	Chit1	TRUE	FALSE	no_overlap	NA	NA	NA	NA	Other	NA	NA	NA
chr1	134196495	134196615	ENSMUSG00000042451	Mybph	TRUE	TRUE	low_confidence	chr1	203172352	203172460	chr1_203172352_203172460	Other	chr1	203172430	203172564
chr1	134510115	134510323	ENSMUSG00000042229	Rabif	TRUE	TRUE	no_overlap	NA	NA	NA	NA	Other	NA	NA	NA
chr1	134557053	134557191	ENSMUSG00000042207	Kdm5b	TRUE	TRUE	high_confidence	chr1	202810740	202810901	chr1_202810740_202810901|chr1_202811455_202811652|chr1_202810552_202810960	Conserved	chr1	202810768	202810898
chr1	134557053	134557191	ENSMUSG00000042207	Kdm5b	TRUE	TRUE	high_confidence	chr1	202811455	202811652	chr1_202810740_202810901|chr1_202811455_202811652|chr1_202810552_202810960	Conserved	chr1	202810768	202810898
chr1	134557053	134557191	ENSMUSG00000042207	Kdm5b	TRUE	TRUE	high_confidence	chr1	202810552	202810960	chr1_202810740_202810901|chr1_202811455_202811652|chr1_202810552_202810960	Conserved	chr1	202810768	202810898
chr1	134560041	134560279	ENSMUSG00000042207	Kdm5b	TRUE	TRUE	high_confidence	chr1	202808430	202808556	chr1_202808430_202808556|chr1_202808295_202808590|chr1_202807728_202807850	Conserved	chr1	202808365	202808622
chr1	134560041	134560279	ENSMUSG00000042207	Kdm5b	TRUE	TRUE	high_confidence	chr1	202808295	202808590	chr1_202808430_202808556|chr1_202808295_202808590|chr1_202807728_202807850	Conserved	chr1	202808365	202808622
chr1	134560041	134560279	ENSMUSG00000042207	Kdm5b	TRUE	TRUE	high_confidence	chr1	202807728	202807850	chr1_202808430_202808556|chr1_202808295_202808590|chr1_202807728_202807850	Conserved	chr1	202808365	202808622
chr1	135133122	135133254	ENSMUSG00000031506	Ptpn7	TRUE	TRUE	high_confidence	chr1	202160599	202160676	chr1_202160599_202160676|chr1_202160003_202160135|chr1_202160556_202160804|chr1_202159941_202160219	Conserved	chr1	202160043	202160171
chr1	135133122	135133254	ENSMUSG00000031506	Ptpn7	TRUE	TRUE	high_confidence	chr1	202160003	202160135	chr1_202160599_202160676|chr1_202160003_202160135|chr1_202160556_202160804|chr1_202159941_202160219	Conserved	chr1	202160043	202160171
chr1	135133122	135133254	ENSMUSG00000031506	Ptpn7	TRUE	TRUE	high_confidence	chr1	202160556	202160804	chr1_202160599_202160676|chr1_202160003_202160135|chr1_202160556_202160804|chr1_202159941_202160219	Conserved	chr1	202160043	202160171
chr1	135133122	135133254	ENSMUSG00000031506	Ptpn7	TRUE	TRUE	high_confidence	chr1	202159941	202160219	chr1_202160599_202160676|chr1_202160003_202160135|chr1_202160556_202160804|chr1_202159941_202160219	Conserved	chr1	202160043	202160171
chr1	135136619	135136758	ENSMUSG00000031506	Ptpn7	TRUE	TRUE	low_confidence	chr1	202154968	202155089	chr1_202154968_202155089	Conserved	chr1	202154943	202155087
chr1	135268146	135268381	ENSMUSG00000041926	Rnpep	TRUE	TRUE	no_overlap	NA	NA	NA	NA	Other	chr1	201999643	201999952
chr1	135540468	135540593	ENSMUSG00000009418	Nav1	TRUE	TRUE	no_overlap	NA	NA	NA	NA	Other	chr1	201709600	201709696
chr1	135729055	135729178	ENSMUSG00000026421	Csrp1	TRUE	TRUE	high_confidence	chr1	201507060	201507278	chr1_201507060_201507278|chr1_201506928_201507434	Conserved	chr1	201507169	201507326
chr1	135729055	135729178	ENSMUSG00000026421	Csrp1	TRUE	TRUE	high_confidence	chr1	201506928	201507434	chr1_201507060_201507278|chr1_201506928_201507434	Conserved	chr1	201507169	201507326
chr1	135834324	135834492	ENSMUSG00000041782	Lad1	TRUE	TRUE	no_overlap	NA	NA	NA	NA	Mm-Specific	chr1	201379736	201379983
chr1	136117166	136117279	ENSMUSG00000026407	Cacna1s	TRUE	TRUE	low_confidence	chr1	201043037	201043161	chr1_201043037_201043161	Other	chr1	201042009	201042464
chr1	136135199	136135347	ENSMUSG00000041642	Kif21b	TRUE	TRUE	high_confidence	chr1	201020286	201020434	chr1_201020286_201020434|chr1_201019422_201019737|chr1_201020204_201020455|chr1_201019378_201019830	Conserved	chr1	201019513	201019667
chr1	136135199	136135347	ENSMUSG00000041642	Kif21b	TRUE	TRUE	high_confidence	chr1	201019422	201019737	chr1_201020286_201020434|chr1_201019422_201019737|chr1_201020204_201020455|chr1_201019378_201019830	Conserved	chr1	201019513	201019667
chr1	136135199	136135347	ENSMUSG00000041642	Kif21b	TRUE	TRUE	high_confidence	chr1	201020204	201020455	chr1_201020286_201020434|chr1_201019422_201019737|chr1_201020204_201020455|chr1_201019378_201019830	Conserved	chr1	201019513	201019667
chr1	136135199	136135347	ENSMUSG00000041642	Kif21b	TRUE	TRUE	high_confidence	chr1	201019378	201019830	chr1_201020286_201020434|chr1_201019422_201019737|chr1_201020204_201020455|chr1_201019378_201019830	Conserved	chr1	201019513	201019667
chr1	136140385	136140558	ENSMUSG00000041642	Kif21b	TRUE	TRUE	low_confidence	chr1	201013164	201013478	chr1_201013164_201013478	Conserved	chr1	201014064	201014335
chr1	136255213	136255456	ENSMUSG00000052759	Gpr25	TRUE	TRUE	low_confidence	chr1	200878172	200878520	chr1_200878172_200878520	Other	chr1	200878292	200878543
chr1	136364832	136365020	ENSMUSG00000041570	Camsap2	TRUE	TRUE	no_overlap	NA	NA	NA	NA	Other	NA	NA	NA
chr1	136579531	136579664	ENSMUSG00000041483	Zfp281	TRUE	TRUE	low_confidence	chr1	200473731	200474065	chr1_200473731_200474065	Other	chr1	200472765	200472896
chr1	136600689	136601105	ENSMUSG00000041483	Zfp281	TRUE	TRUE	low_confidence	chr1	200448220	200448569	chr1_200448220_200448569	Other	chr1	200448099	200448559
chr1	136608446	136608638	ENSMUSG00000041483	Zfp281	TRUE	TRUE	no_overlap	NA	NA	NA	NA	Other	chr2	101509884	101509957
chr1	136652181	136652319	ENSMUSG00000041483	Zfp281	TRUE	TRUE	no_overlap	NA	NA	NA	NA	Other	NA	NA	NA
chr1	136685229	136685628	ENSMUSG00000041483	Zfp281	TRUE	TRUE	low_confidence	chr1	200352050	200352274	chr1_200352050_200352274	Other	chr1	200352151	200352560
chr1	136859577	136859686	ENSMUSG00000026398	Nr5a2	TRUE	TRUE	high_confidence	chr1	200154191	200154511	chr1_200154191_200154511|chr1_200154114_200154610|chr1_200153259_200153661	Conserved	chr1	200153474	200153587
chr1	136859577	136859686	ENSMUSG00000026398	Nr5a2	TRUE	TRUE	high_confidence	chr1	200154114	200154610	chr1_200154191_200154511|chr1_200154114_200154610|chr1_200153259_200153661	Conserved	chr1	200153474	200153587
chr1	136859577	136859686	ENSMUSG00000026398	Nr5a2	TRUE	TRUE	high_confidence	chr1	200153259	200153661	chr1_200154191_200154511|chr1_200154114_200154610|chr1_200153259_200153661	Conserved	chr1	200153474	200153587
chr1	137516782	137516904	ENSMUSG00000026395	Ptprc	TRUE	TRUE	no_overlap	NA	NA	NA	NA	Conserved	chr1	199335606	199335728
chr1	138039247	138039420	ENSMUSG00000026395	Ptprc	TRUE	TRUE	no_overlap	NA	NA	NA	NA	Conserved	chr1	198776724	198776897
chr1	138136495	138136736	ENSMUSG00000026395	Ptprc	TRUE	TRUE	high_confidence	chr1	198681918	198682135	chr1_198681918_198682135|chr1_198681822_198682206	Conserved	chr1	198681862	198682100
chr1	138136495	138136736	ENSMUSG00000026395	Ptprc	TRUE	TRUE	high_confidence	chr1	198681822	198682206	chr1_198681918_198682135|chr1_198681822_198682206	Conserved	chr1	198681862	198682100
chr1	138142404	138142571	ENSMUSG00000026395	Ptprc	TRUE	TRUE	no_overlap	NA	NA	NA	NA	Conserved	chr1	198675854	198676038
chr1	138144475	138144706	ENSMUSG00000026395	Ptprc	TRUE	TRUE	no_overlap	NA	NA	NA	NA	Conserved	NA	NA	NA
chr1	138148965	138149148	ENSMUSG00000026395	Ptprc	TRUE	TRUE	high_confidence	chr1	198669160	198669302	chr1_198669160_198669302|chr1_198669061_198669437	Conserved	chr1	198669151	198669357
chr1	138148965	138149148	ENSMUSG00000026395	Ptprc	TRUE	TRUE	high_confidence	chr1	198669061	198669437	chr1_198669160_198669302|chr1_198669061_198669437	Conserved	chr1	198669151	198669357
chr1	138162672	138163030	ENSMUSG00000026395	Ptprc	TRUE	TRUE	low_confidence	chr1	198652119	198652242	chr1_198652119_198652242	Conserved	chr1	198652719	198653078
chr1	138166179	138166493	ENSMUSG00000026395	Ptprc	TRUE	TRUE	low_confidence	chr1	198650053	198650197	chr1_198650053_198650197|chr1_198649688_198649866	Conserved	chr1	198648777	198649131
chr1	138166179	138166493	ENSMUSG00000026395	Ptprc	TRUE	TRUE	low_confidence	chr1	198649688	198649866	chr1_198650053_198650197|chr1_198649688_198649866	Conserved	chr1	198648777	198649131
chr1	138175248	138175317	ENSMUSG00000026395	Ptprc	TRUE	TRUE	high_confidence	chr1	198638965	198639138	chr1_198638965_198639138|chr1_198638912_198639197	Conserved	chr1	198639028	198639097
chr1	138175248	138175317	ENSMUSG00000026395	Ptprc	TRUE	TRUE	high_confidence	chr1	198638912	198639197	chr1_198638965_198639138|chr1_198638912_198639197	Conserved	chr1	198639028	198639097
chr1	138176687	138176823	ENSMUSG00000026395	Ptprc	TRUE	TRUE	no_overlap	NA	NA	NA	NA	Conserved	NA	NA	NA
chr1	138180228	138180479	ENSMUSG00000026395	Ptprc	TRUE	FALSE	no_overlap	NA	NA	NA	NA	Conserved	NA	NA	NA
chr1	138188227	138188458	ENSMUSG00000026395	Ptprc	TRUE	TRUE	no_overlap	NA	NA	NA	NA	Conserved	chr1	198631919	198632326
chr1	138191724	138191896	ENSMUSG00000026395	Ptprc	TRUE	TRUE	high_confidence	chr1	198621596	198621844	chr1_198621596_198621844|chr1_198621306_198621462|chr1_198621005_198621129|chr1_198620923_198621903	Conserved	chr1	198621576	198621759
chr1	138191724	138191896	ENSMUSG00000026395	Ptprc	TRUE	TRUE	high_confidence	chr1	198621306	198621462	chr1_198621596_198621844|chr1_198621306_198621462|chr1_198621005_198621129|chr1_198620923_198621903	Conserved	chr1	198621576	198621759
chr1	138191724	138191896	ENSMUSG00000026395	Ptprc	TRUE	TRUE	high_confidence	chr1	198621005	198621129	chr1_198621596_198621844|chr1_198621306_198621462|chr1_198621005_198621129|chr1_198620923_198621903	Conserved	chr1	198621576	198621759
chr1	138191724	138191896	ENSMUSG00000026395	Ptprc	TRUE	TRUE	high_confidence	chr1	198620923	198621903	chr1_198621596_198621844|chr1_198621306_198621462|chr1_198621005_198621129|chr1_198620923_198621903	Conserved	chr1	198621576	198621759
chr1	138248927	138249030	ENSMUSG00000026394	Atp6v1g3	TRUE	TRUE	high_confidence	chr1	198556980	198557258	chr1_198556980_198557258|chr1_198556882_198557297	Conserved	NA	NA	NA
chr1	138248927	138249030	ENSMUSG00000026394	Atp6v1g3	TRUE	TRUE	high_confidence	chr1	198556882	198557297	chr1_198556980_198557258|chr1_198556882_198557297	Conserved	NA	NA	NA
chr1	138258882	138259049	ENSMUSG00000026394	Atp6v1g3	TRUE	TRUE	no_overlap	NA	NA	NA	NA	Conserved	chr1	198552813	198553081
chr1	138288877	138289048	ENSMUSG00000026394	Atp6v1g3	TRUE	TRUE	low_confidence	chr1	198523230	198523484	chr1_198523230_198523484|chr1_198521019_198521147	Conserved	NA	NA	NA
chr1	138288877	138289048	ENSMUSG00000026394	Atp6v1g3	TRUE	TRUE	low_confidence	chr1	198521019	198521147	chr1_198523230_198523484|chr1_198521019_198521147	Conserved	NA	NA	NA
chr1	138290026	138290379	ENSMUSG00000026394	Atp6v1g3	TRUE	TRUE	high_confidence	chr1	198520627	198520838	chr1_198520627_198520838|chr1_198521019_198521147|chr1_198520593_198520890|chr1_198519772_198519953	Conserved	chr1	198520616	198520976
chr1	138290026	138290379	ENSMUSG00000026394	Atp6v1g3	TRUE	TRUE	high_confidence	chr1	198521019	198521147	chr1_198520627_198520838|chr1_198521019_198521147|chr1_198520593_198520890|chr1_198519772_198519953	Conserved	chr1	198520616	198520976
chr1	138290026	138290379	ENSMUSG00000026394	Atp6v1g3	TRUE	TRUE	high_confidence	chr1	198520593	198520890	chr1_198520627_198520838|chr1_198521019_198521147|chr1_198520593_198520890|chr1_198519772_198519953	Conserved	chr1	198520616	198520976
chr1	138290026	138290379	ENSMUSG00000026394	Atp6v1g3	TRUE	TRUE	high_confidence	chr1	198519772	198519953	chr1_198520627_198520838|chr1_198521019_198521147|chr1_198520593_198520890|chr1_198519772_198519953	Conserved	chr1	198520616	198520976
chr1	138299554	138299789	ENSMUSG00000026394	Atp6v1g3	TRUE	FALSE	no_overlap	NA	NA	NA	NA	Conserved	NA	NA	NA
chr1	138304274	138304407	ENSMUSG00000026394	Atp6v1g3	TRUE	TRUE	no_overlap	NA	NA	NA	NA	Conserved	chr1	198491692	198491854
chr1	138348556	138348759	ENSMUSG00000026394	Atp6v1g3	TRUE	TRUE	no_overlap	NA	NA	NA	NA	Conserved	chr1	198443482	198443693
chr1	138517040	138517216	ENSMUSG00000026393	Nek7	TRUE	TRUE	no_overlap	NA	NA	NA	NA	Conserved	chr1	198277598	198277649
chr1	138559646	138559979	ENSMUSG00000026393	Nek7	TRUE	TRUE	low_confidence	chr1	198234498	198234655	chr1_198234498_198234655	Conserved	chr1	198234631	198234957
chr1	138587928	138588127	ENSMUSG00000026393	Nek7	TRUE	TRUE	high_confidence	chr1	198188172	198188444	chr1_198188172_198188444|chr1_198188093_198188516	Conserved	chr1	198188195	198188422
chr1	138587928	138588127	ENSMUSG00000026393	Nek7	TRUE	TRUE	high_confidence	chr1	198188093	198188516	chr1_198188172_198188444|chr1_198188093_198188516	Conserved	chr1	198188195	198188422
chr1	138596432	138596565	ENSMUSG00000026393	Nek7	TRUE	TRUE	low_confidence	chr1	198182395	198182524	chr1_198182395_198182524	Conserved	chr1	198181383	198181503
chr1	138604199	138604366	ENSMUSG00000026393	Nek7	TRUE	TRUE	low_confidence	chr1	198175933	198176093	chr1_198175933_198176093|chr1_198174337_198174600	Conserved	chr1	198175563	198175573
chr1	138604199	138604366	ENSMUSG00000026393	Nek7	TRUE	TRUE	low_confidence	chr1	198174337	198174600	chr1_198175933_198176093|chr1_198174337_198174600	Conserved	chr1	198175563	198175573
chr1	138843379	138843488	ENSMUSG00000019230	Lhx9	TRUE	TRUE	low_confidence	chr1	197916257	197916450	chr1_197916257_197916450	Other	chr1	197916277	197916441
chr1	138930979	138931172	ENSMUSG00000056268	Dennd1b	TRUE	TRUE	no_overlap	NA	NA	NA	NA	Conserved	NA	NA	NA
chr1	138933441	138933597	ENSMUSG00000056268	Dennd1b	TRUE	TRUE	no_overlap	NA	NA	NA	NA	Conserved	NA	NA	NA
chr1	138939741	138939984	ENSMUSG00000056268	Dennd1b	TRUE	TRUE	no_overlap	NA	NA	NA	NA	Conserved	NA	NA	NA
chr1	138955217	138955326	ENSMUSG00000056268	Dennd1b	TRUE	TRUE	no_overlap	NA	NA	NA	NA	Conserved	NA	NA	NA
chr1	138963546	138963834	ENSMUSG00000056268	Dennd1b	TRUE	TRUE	high_confidence	chr1	197775342	197775610	chr1_197775342_197775610|chr1_197776261_197776680|chr1_197775255_197775676	Conserved	chr1	197775188	197775759
chr1	138963546	138963834	ENSMUSG00000056268	Dennd1b	TRUE	TRUE	high_confidence	chr1	197776261	197776680	chr1_197775342_197775610|chr1_197776261_197776680|chr1_197775255_197775676	Conserved	chr1	197775188	197775759
chr1	138963546	138963834	ENSMUSG00000056268	Dennd1b	TRUE	TRUE	high_confidence	chr1	197775255	197775676	chr1_197775342_197775610|chr1_197776261_197776680|chr1_197775255_197775676	Conserved	chr1	197775188	197775759
chr1	138973628	138974016	ENSMUSG00000056268	Dennd1b	TRUE	TRUE	no_overlap	NA	NA	NA	NA	Conserved	chr1	197764615	197765074
chr1	138976030	138976203	ENSMUSG00000056268	Dennd1b	TRUE	TRUE	no_overlap	NA	NA	NA	NA	Conserved	chr1	197761755	197761939
chr1	139009695	139009855	ENSMUSG00000056268	Dennd1b	TRUE	TRUE	no_overlap	NA	NA	NA	NA	Conserved	NA	NA	NA
chr1	141898117	141898253	ENSMUSG00000052726	Kcnt2	TRUE	TRUE	no_overlap	NA	NA	NA	NA	Other	NA	NA	NA
chr1	143100614	143100681	ENSMUSG00000026361	Cdc73	TRUE	FALSE	no_overlap	NA	NA	NA	NA	Other	NA	NA	NA
chr1	143466170	143466399	ENSMUSG00000026361	Cdc73	TRUE	TRUE	no_overlap	NA	NA	NA	NA	Other	chr1	193396258	193396326
chr1	143536464	143536601	ENSMUSG00000026361	Cdc73	TRUE	TRUE	no_overlap	NA	NA	NA	NA	Other	chr1	193314322	193314791
[truncated: 17,519 more rows]
