# Supplementary material for: The Th1 cell regulatory circuitry is largely conserved between human and mouse
Source: Life Sci Alliance. 2021 Sep 16;4(11):e202101075. doi: 10.26508/lsa.202101075 (PMC8960437; doi:10.26508/lsa.202101075)
Supplement: Supplementary file 4 [file LSA-2021-01075_TableS4.xlsx]

## Sheet: Table S4
Human.Ensembl_gene_id	Mouse.Ensembl_gene_id	HGNC_symbol	MGI_symbol	ChIP	Hs.Th1	Mm.Th1	HsMm.Th1.logFC	Hs_num_T-bet_binding_sites	Mm_num_T-bet_binding_sites	p value	adjust.p value
ENSG00000000003	ENSMUSG00000067377	TSPAN6	Tspan6	Other	3.69845	4.57965	-0.255472	0	0	0.0194774	1
ENSG00000000005	ENSMUSG00000031250	TNMD	Tnmd	Other	-2.33511	-Inf	Inf	0	0	0.136079	1
ENSG00000000457	ENSMUSG00000026584	SCYL3	Scyl3	Other	8.57275	11.3136	-2.11511	2	0	0.00124366	1
ENSG00000000460	ENSMUSG00000041406	C1orf112	BC055324	Other	8.40289	7.03453	1.99408	0	1	0.00568877	1
ENSG00000000938	ENSMUSG00000028874	FGR	Fgr	Conserved	3.35211	4.79336	-0.81552	5	3	0.00146532	1
ENSG00000001036	ENSMUSG00000019810	FUCA2	Fuca2	Other	6.80416	9.6437	-2.21382	1	0	3.64598e-05	0.468399
ENSG00000001084	ENSMUSG00000032350	GCLC	Gclc	Conserved	8.81894	10.9467	-1.50203	2	1	3.00337e-05	0.388246
ENSG00000001167	ENSMUSG00000023994	NFYA	Nfya	Other	8.77542	10.8076	-1.40642	2	0	0.011402	1
ENSG00000001460	ENSMUSG00000028801	STPG1	Stpg1	Other	5.98563	1.64158	4.96978	0	0	5.53243e-10	8.30141e-06
ENSG00000001461	ENSMUSG00000028803	NIPAL3	Nipal3	Other	9.37223	10.5303	-0.532381	2	1	0.965706	1
ENSG00000001497	ENSMUSG00000057421	LAS1L	Las1l	Conserved	9.43718	10.3222	-0.259338	2	1	0.48115	1
ENSG00000001561	ENSMUSG00000023961	ENPP4	Enpp4	Other	7.99288	9.6904	-1.0718	1	0	0.0532845	1
ENSG00000001617	ENSMUSG00000034684	SEMA3F	Sema3f	Other	2.66363	5.80092	-2.51157	0	1	1.68521e-06	0.0233401
ENSG00000001626	ENSMUSG00000041301	CFTR	Cftr	Other	2.66259	-3.59323	6.88154	0	0	8.30867e-06	0.11132
ENSG00000001629	ENSMUSG00000040351	ANKIB1	Ankib1	Other	9.96453	11.6171	-1.02686	0	2	0.0345852	1
ENSG00000001630	ENSMUSG00000001467	CYP51A1	Cyp51	Other	10.0793	11.9645	-1.25949	0	1	0.3088	1
ENSG00000002016	ENSMUSG00000030166	RAD52	Rad52	Other	7.2253	9.03182	-1.1808	3	0	0.00127445	1
ENSG00000002330	ENSMUSG00000024959	BAD	Bad	Other	6.74378	8.11508	-0.745579	3	0	0.0539312	1
ENSG00000002549	ENSMUSG00000039682	LAP3	Lap3	Other	10.3026	9.20651	1.72181	1	0	2.01234e-06	0.0277945
ENSG00000002587	ENSMUSG00000051022	HS3ST1	Hs3st1	Other	3.55384	-1.05749	5.23706	0	0	0.00028156	1
ENSG00000002745	ENSMUSG00000029671	WNT16	Wnt16	Other	2.80296	3.48999	-0.0613087	0	0	0.215955	1
ENSG00000002746	ENSMUSG00000021301	HECW1	Hecw1	Other	2.58578	1.64862	1.56287	0	0	0.149414	1
ENSG00000002822	ENSMUSG00000029554	MAD1L1	Mad1l1	Other	8.38788	7.9489	1.0647	12	0	4.10013e-05	0.524734
ENSG00000002834	ENSMUSG00000038366	LASP1	Lasp1	Conserved	10.7886	12.4964	-1.08206	9	3	0.0441245	1
ENSG00000002919	ENSMUSG00000020876	SNX11	Snx11	Other	8.09594	8.72994	-0.00828312	1	0	0.212515	1
ENSG00000002933	ENSMUSG00000023367	TMEM176A	Tmem176a	Other	1.79073	8.41007	-5.99362	0	0	7.84712e-08	0.00113571
ENSG00000003056	ENSMUSG00000007458	M6PR	M6pr	Other	10.2585	12.9258	-2.04155	6	0	0.0011092	1
ENSG00000003096	ENSMUSG00000036782	KLHL13	Klhl13	Other	2.14179	-Inf	Inf	0	0	0.00114057	1
ENSG00000003137	ENSMUSG00000063415	CYP26B1	Cyp26b1	Other	0.621292	0.3391	0.907914	0	0	0.119941	1
ENSG00000003147	ENSMUSG00000062995	ICA1	Ica1	Other	4.12364	5.80207	-1.05271	8	1	0.366615	1
ENSG00000003249	ENSMUSG00000031970	DBNDD1	Dbndd1	Hs-Specific	2.5726	5.18604	-1.98772	1	0	0.00832572	1
ENSG00000003393	ENSMUSG00000026024	ALS2	Als2	Other	7.92436	8.78553	-0.235446	0	1	0.834977	1
ENSG00000003402	ENSMUSG00000026031	CFLAR	Cflar	Alternative	12.825	12.7182	0.732576	6	3	0.0025852	1
ENSG00000003436	ENSMUSG00000027082	TFPI	Tfpi	Other	7.56358	7.83928	0.350021	0	0	0.0284123	1
ENSG00000003756	ENSMUSG00000032580	RBM5	Rbm5	Other	11.1589	13.4021	-1.61744	1	1	0.0419871	1
ENSG00000003987	ENSMUSG00000039431	MTMR7	Mtmr7	Other	5.2455	7.55358	-1.68236	0	3	3.5267e-05	0.453322
ENSG00000003989	ENSMUSG00000031596	SLC7A2	Slc7a2	Other	1.94362	5.21071	-2.64137	0	0	1.0721e-05	0.142557
ENSG00000004059	ENSMUSG00000020440	ARF5	Arf5	Other	9.64107	11.2151	-0.948281	0	0	0.469312	1
ENSG00000004139	ENSMUSG00000050132	SARM1	Sarm1	Other	8.40363	5.64423	3.38512	0	0	7.20043e-07	0.0101226
ENSG00000004142	ENSMUSG00000001100	POLDIP2	Poldip2	Other	9.45949	9.04414	1.04108	0	0	3.64544e-07	0.0051707
ENSG00000004399	ENSMUSG00000030123	PLXND1	Plxnd1	Other	9.63781	8.97561	1.28792	3	0	0.359158	1
ENSG00000004455	ENSMUSG00000028792	AK2	Ak2	Alternative	10.8115	10.9508	0.48641	2	3	0.0628918	1
ENSG00000004468	ENSMUSG00000029084	CD38	Cd38	Other	9.96498	7.68655	2.90415	4	0	0.0222092	1
ENSG00000004478	ENSMUSG00000030357	FKBP4	Fkbp4	Other	9.82585	10.5058	-0.054216	1	0	0.374119	1
ENSG00000004487	ENSMUSG00000036940	KDM1A	Kdm1a	Other	9.8475	10.9677	-0.494448	1	1	0.881303	1
ENSG00000004534	ENSMUSG00000032582	RBM6	Rbm6	Conserved	10.6588	12.0084	-0.723868	1	3	0.726094	1
ENSG00000004660	ENSMUSG00000020785	CAMKK1	Camkk1	Other	5.3321	5.27314	0.684678	0	0	0.228166	1
ENSG00000004700	ENSMUSG00000030243	RECQL	Recql	Other	10.8906	9.98109	1.5352	0	0	1.9481e-05	0.254948
ENSG00000004766	ENSMUSG00000001376	VPS50	Vps50	Other	8.84427	10.0513	-0.581271	0	0	0.368816	1
ENSG00000004776	ENSMUSG00000036854	HSPB6	Hspb6	Other	0.629046	7.04104	-5.78627	0	0	5.17384e-10	7.768e-06
ENSG00000004777	ENSMUSG00000036882	ARHGAP33	Arhgap33	Other	7.13426	7.28771	0.472276	0	0	0.578327	1
ENSG00000004779	ENSMUSG00000030869	NDUFAB1	Ndufab1	Conserved	9.79676	10.0854	0.337096	1	1	0.271934	1
ENSG00000004799	ENSMUSG00000019577	PDK4	Pdk4	Other	-3.80147	2.38353	-5.55928	0	0	0.000392882	1
ENSG00000004809	ENSMUSG00000019834	SLC22A16	Slc22a16	Other	2.59672	-Inf	Inf	0	0	4.11656e-05	0.52659
ENSG00000004838	ENSMUSG00000010044	ZMYND10	Zmynd10	Conserved	4.17714	4.74432	0.0585477	1	1	0.491218	1
ENSG00000004846	ENSMUSG00000072791	ABCB5	Abcb5	Other	6.33692	-1.53017	8.49281	0	0	0.00385243	1
ENSG00000004848	ENSMUSG00000035277	ARX	Arx	Other	2.92719	1.19428	2.35863	0	0	0.799319	1
ENSG00000004864	ENSMUSG00000015112	SLC25A13	Slc25a13	Other	6.9873	5.78021	1.83281	0	1	3.46844e-07	0.00492345
ENSG00000004866	ENSMUSG00000029534	ST7	St7	Other	6.12625	7.80529	-1.05332	0	0	0.0344144	1
ENSG00000004897	ENSMUSG00000020687	CDC27	Cdc27	Other	10.3326	10.9085	0.0499022	0	0	0.0254063	1
ENSG00000004939	ENSMUSG00000006574	SLC4A1	Slc4a1	Other	3.83776	-0.390358	4.85384	0	0	1.23511e-07	0.00177929
ENSG00000004948	ENSMUSG00000023964	CALCR	Calcr	Other	-1.57438	-Inf	Inf	0	0	0.335955	1
ENSG00000004961	ENSMUSG00000031352	HCCS	Hccs	Other	7.41294	10.1677	-2.12906	1	0	0.00284687	1
ENSG00000004975	ENSMUSG00000020888	DVL2	Dvl2	Other	8.40146	9.18801	-0.160831	1	0	0.227965	1
ENSG00000005007	ENSMUSG00000058301	UPF1	Upf1	Other	10.7117	11.5943	-0.256838	1	0	0.0831198	1
ENSG00000005020	ENSMUSG00000059182	SKAP2	Skap2	Other	7.00829	10.6507	-3.01669	0	1	0.000399329	1
ENSG00000005022	ENSMUSG00000016319	SLC25A5	Slc25a5	Conserved	10.9928	13.1583	-1.53981	1	1	0.159763	1
ENSG00000005059	ENSMUSG00000027994	MCUB	Mcub	Other	9.5908	8.38302	1.8335	2	0	0.000276124	1
ENSG00000005073	ENSMUSG00000038210	HOXA11	Hoxa11	Other	-2.28606	-3.93358	2.27323	0	0	0.265834	1
ENSG00000005100	ENSMUSG00000040620	DHX33	Dhx33	Conserved	9.10019	10.2341	-0.508192	1	1	0.901967	1
ENSG00000005102	ENSMUSG00000001493	MEOX1	Meox1	Other	4.04094	-Inf	Inf	1	0	1.02414e-06	0.0143226
ENSG00000005108	ENSMUSG00000032625	THSD7A	Thsd7a	Other	2.09624	3.52109	-0.79913	0	0	0.00274316	1
ENSG00000005156	ENSMUSG00000020697	LIG3	Lig3	Other	9.42214	10.2149	-0.167082	0	0	0.13701	1
ENSG00000005175	ENSMUSG00000022466	RPAP3	Rpap3	Other	8.98361	8.78453	0.824809	2	1	5.96119e-05	0.752779
ENSG00000005187	ENSMUSG00000030935	ACSM3	Acsm3	Other	5.94072	4.55606	2.01038	0	0	0.000491584	1
ENSG00000005189	ENSMUSG00000030924	REXO5	Rexo5	Other	5.31413	10.7388	-4.79893	0	3	1.46611e-10	2.21456e-06
ENSG00000005194	ENSMUSG00000031781	CIAPIN1	Ciapin1	Other	8.96138	10.0587	-0.471601	0	0	0.973709	1
ENSG00000005206	ENSMUSG00000035206	SPPL2B	Sppl2b	Other	9.0838	9.04948	0.660036	0	0	0.0593399	1
ENSG00000005238	ENSMUSG00000036002	FAM214B	Fam214b	Other	6.99034	8.81916	-1.2031	0	0	0.0304519	1
ENSG00000005243	ENSMUSG00000018672	COPZ2	Copz2	Other	3.65951	2.51155	1.77368	0	0	0.0464746	1
ENSG00000005249	ENSMUSG00000002997	PRKAR2B	Prkar2b	Other	3.76278	5.10891	-0.720415	2	1	0.0563636	1
ENSG00000005302	ENSMUSG00000047669	MSL3	Msl3l2	Other	10.3847	5.95551	5.05489	0	0	2.14085e-09	3.18987e-05
ENSG00000005339	ENSMUSG00000022521	CREBBP	Crebbp	Other	11.2507	12.7953	-0.918893	3	0	0.327661	1
ENSG00000005379	ENSMUSG00000034156	TSPOAP1	Tspoap1	Conserved	9.80071	9.16191	1.26452	6	1	0.00244273	1
ENSG00000005381	ENSMUSG00000009350	MPO	Mpo	Other	2.0727	1.92466	0.773761	0	0	0.270503	1
ENSG00000005421	ENSMUSG00000002588	PON1	Pon1	Other	-0.781589	-Inf	Inf	0	0	0.149368	1
ENSG00000005436	ENSMUSG00000035125	GCFC2	Gcfc2	Other	8.31479	8.55657	0.383944	1	0	0.0462674	1
ENSG00000005448	ENSMUSG00000030032	WDR54	Wdr54	Other	7.548	5.52401	2.64972	0	0	5.59882e-05	0.70881
ENSG00000005469	ENSMUSG00000003623	CROT	Crot	Other	7.10696	11.4188	-3.68612	0	1	1.63756e-06	0.0226966
ENSG00000005471	ENSMUSG00000042476	ABCB4	Abcb4	Other	1.77621	4.87	-2.46806	0	0	1.42503e-08	0.000209665
ENSG00000005483	ENSMUSG00000029004	KMT2E	Kmt2e	Conserved	11.4932	13.3793	-1.26039	3	5	0.355078	1
ENSG00000005486	ENSMUSG00000039917	RHBDD2	Rhbdd2	Other	9.47479	9.44811	0.652403	1	1	0.709067	1
ENSG00000005513	ENSMUSG00000024176	SOX8	Sox8	Other	4.27087	4.77298	0.123605	0	0	0.454755	1
ENSG00000005700	ENSMUSG00000035941	IBTK	Ibtk	Other	10.0385	10.6539	0.0102474	0	1	0.100924	1
ENSG00000005810	ENSMUSG00000033004	MYCBP2	Mycbp2	Other	11.5382	13.2986	-1.13467	2	0	0.411883	1
ENSG00000005812	ENSMUSG00000022124	FBXL3	Fbxl3	Other	10.068	11.6668	-0.973096	0	0	0.210106	1
ENSG00000005844	ENSMUSG00000030830	ITGAL	Itgal	Conserved	12.1379	14.5297	-1.76613	2	3	0.000749191	1
ENSG00000005882	ENSMUSG00000038967	PDK2	Pdk2	Other	6.46319	7.84765	-0.758736	1	0	0.137168	1
ENSG00000005884	ENSMUSG00000001507	ITGA3	Itga3	Other	7.97332	8.58713	0.0119144	1	1	0.0489957	1
ENSG00000005889	ENSMUSG00000079509	ZFX	Zfx	Other	10.1036	11.1112	-0.381873	2	0	0.638434	1
ENSG00000005893	ENSMUSG00000016534	LAMP2	Lamp2	Other	9.80137	10.7557	-0.328618	2	0	0.880028	1
ENSG00000005961	ENSMUSG00000034664	ITGA2B	Itga2b	Other	3.55014	6.29262	-2.11676	0	0	0.000963315	1
ENSG00000005981	ENSMUSG00000042607	ASB4	Asb4	Other	4.34039	1.63855	3.32757	1	0	1.43422e-05	0.189374
ENSG00000006007	ENSMUSG00000033917	GDE1	Gde1	Other	8.89114	9.79522	-0.278363	0	0	0.292252	1
ENSG00000006015	ENSMUSG00000058833	REX1BD	Rex1bd	Other	7.74901	8.74482	-0.37009	0	0	0.716994	1
ENSG00000006016	ENSMUSG00000007888	CRLF1	Crlf1	Other	5.23139	0.487011	5.3701	1	0	1.08662e-09	1.62559e-05
ENSG00000006025	ENSMUSG00000038534	OSBPL7	Osbpl7	Other	8.32736	9.6624	-0.709308	1	0	0.137695	1
ENSG00000006042	ENSMUSG00000035413	TMEM98	Tmem98	Other	3.83947	-Inf	Inf	0	0	2.33482e-06	0.0321691
ENSG00000006047	ENSMUSG00000018554	YBX2	Ybx2	Other	1.85699	2.02856	0.454156	1	0	0.886362	1
ENSG00000006062	ENSMUSG00000020941	MAP3K14	Map3k14	Other	9.29384	10.364	-0.444421	1	1	0.947003	1
ENSG00000006071	ENSMUSG00000040136	ABCC8	Abcc8	Other	4.18945	-5.95162	10.7668	0	0	0.0186098	1
ENSG00000006116	ENSMUSG00000066189	CACNG3	Cacng3	Other	1.01683	0.491983	1.15057	0	0	0.693652	1
ENSG00000006118	ENSMUSG00000024736	TMEM132A	Tmem132a	Other	3.75974	2.9461	1.43936	0	0	0.484708	1
ENSG00000006125	ENSMUSG00000035152	AP2B1	Ap2b1	Other	11.669	11.6253	0.6694	1	0	0.00913679	1
ENSG00000006128	ENSMUSG00000061762	TAC1	Tac1	Other	-2.36067	-3.59323	1.85828	0	0	0.900537	1
ENSG00000006194	ENSMUSG00000022529	ZNF263	Zfp263	Other	8.85252	10.685	-1.20678	0	0	0.0272111	1
ENSG00000006210	ENSMUSG00000031778	CX3CL1	Cx3cl1	Other	3.39479	0.338399	3.68211	0	0	7.27426e-05	0.912484
ENSG00000006282	ENSMUSG00000020867	SPATA20	Spata20	Other	7.43846	-Inf	Inf	1	0	2.12644e-12	3.25537e-08
ENSG00000006283	ENSMUSG00000020866	CACNA1G	Cacna1g	Other	2.18869	2.46115	0.353266	0	0	0.587072	1
ENSG00000006377	ENSMUSG00000029754	DLX6	Dlx6	Other	1.13322	4.00415	-2.2452	0	0	6.0643e-05	0.765315
ENSG00000006432	ENSMUSG00000042724	MAP3K9	Map3k9	Other	7.81853	4.59008	3.85418	1	1	1.72437e-06	0.0238739
ENSG00000006451	ENSMUSG00000008859	RALA	Rala	Other	9.25818	9.59947	0.28444	0	0	0.0107794	1
ENSG00000006453	ENSMUSG00000038859	BAIAP2L1	Baiap2l1	Other	4.62281	4.55235	0.696184	0	0	0.332864	1
ENSG00000006459	ENSMUSG00000042599	KDM7A	Kdm7a	Other	11.3241	11.7831	0.16672	8	1	0.277233	1
ENSG00000006468	ENSMUSG00000004151	ETV1	Etv1	Other	1.99478	4.93301	-2.31251	2	0	1.03042e-06	0.0144094
ENSG00000006530	ENSMUSG00000029916	AGK	Agk	Other	9.99018	9.00196	1.61394	2	0	5.59692e-07	0.00789557
ENSG00000006534	ENSMUSG00000024885	ALDH3B1	Aldh3b1	Other	4.13969	3.1993	1.56611	0	0	0.0257843	1
ENSG00000006555	ENSMUSG00000034919	TTC22	Ttc22	Hs-Specific	6.59354	1.40652	5.81275	1	0	2.2987e-11	3.49747e-07
ENSG00000006576	ENSMUSG00000039987	PHTF2	Phtf2	Other	9.23667	9.08455	0.777837	1	0	0.00148622	1
ENSG00000006607	ENSMUSG00000034066	FARP2	Farp2	Other	8.5705	5.10431	4.09192	1	0	1.81747e-06	0.0251465
ENSG00000006611	ENSMUSG00000030838	USH1C	Ush1c	Other	0.776092	-3.67977	5.08158	0	0	0.768072	1
ENSG00000006634	ENSMUSG00000002297	DBF4	Dbf4	Other	9.52331	10.1547	-0.00568077	1	0	0.0860757	1
ENSG00000006638	ENSMUSG00000034881	TBXA2R	Tbxa2r	Other	2.72056	9.29318	-5.94689	0	0	8.04108e-09	0.000118871
ENSG00000006652	ENSMUSG00000001627	IFRD1	Ifrd1	Other	9.71835	11.4111	-1.06705	0	4	0.55104	1
ENSG00000006695	ENSMUSG00000042148	COX10	Cox10	Conserved	7.86524	8.90899	-0.418029	5	2	0.21932	1
ENSG00000006704	ENSMUSG00000023079	GTF2IRD1	Gtf2ird1	Other	5.68611	6.76105	-0.449224	0	0	0.464338	1
ENSG00000006712	ENSMUSG00000003437	PAF1	Paf1	Other	9.34443	10.6982	-0.728095	0	0	0.118935	1
ENSG00000006715	ENSMUSG00000041236	VPS41	Vps41	Other	9.20523	10.5166	-0.68568	0	0	0.169079	1
ENSG00000006740	ENSMUSG00000033389	ARHGAP44	Arhgap44	Other	3.86545	1.58538	2.9058	1	0	0.000847168	1
ENSG00000006744	ENSMUSG00000020549	ELAC2	Elac2	Other	9.65852	10.0323	0.251925	1	0	0.0123486	1
ENSG00000006747	ENSMUSG00000002565	SCIN	Scin	Other	5.42221	6.3557	-0.307758	0	0	0.509636	1
ENSG00000006788	ENSMUSG00000060180	MYH13	Myh13	Other	-0.415845	-0.0562033	0.26608	0	0	0.384015	1
ENSG00000006831	ENSMUSG00000030168	ADIPOR2	Adipor2	Other	9.86611	11.6821	-1.19026	1	2	0.0124758	1
ENSG00000006837	ENSMUSG00000020389	CDKL3	Cdkl3	Other	5.06984	6.66791	-0.972356	1	6	0.00589406	1
ENSG00000007001	ENSMUSG00000026839	UPP2	Upp2	Other	-1.56286	0.320249	-1.25739	1	2	0.0828977	1
ENSG00000007038	ENSMUSG00000024116	PRSS21	Prss21	Other	3.96736	-Inf	Inf	0	0	2.60042e-06	0.0357323
ENSG00000007047	ENSMUSG00000030397	MARK4	Mark4	Other	7.43396	9.61902	-1.55934	0	0	2.60619e-05	0.338545
ENSG00000007062	ENSMUSG00000029086	PROM1	Prom1	Other	1.87888	6.26339	-3.75879	0	0	2.58472e-09	3.84607e-05
ENSG00000007080	ENSMUSG00000007721	CCDC124	Ccdc124	Other	7.75666	9.48965	-1.10727	0	0	0.0840894	1
ENSG00000007168	ENSMUSG00000020745	PAFAH1B1	Pafah1b1	Other	11.2299	12.7068	-0.851151	2	0	0.430327	1
ENSG00000007171	ENSMUSG00000020826	NOS2	Nos2	Other	1.38548	2.14879	-0.137589	0	0	0.230155	1
ENSG00000007174	ENSMUSG00000056752	DNAH9	Dnah9	Other	2.42109	4.1523	-1.10549	0	0	0.585177	1
ENSG00000007202	ENSMUSG00000010277	KIAA0100	2610507B11Rik	Other	11.561	12.2648	-0.0781142	0	0	0.102526	1
ENSG00000007216	ENSMUSG00000001095	SLC13A2	Slc13a2	Other	-0.158947	-Inf	Inf	0	0	0.451652	1
ENSG00000007237	ENSMUSG00000033066	GAS7	Gas7	Alternative	4.50062	5.42133	-0.294986	4	5	0.0433001	1
ENSG00000007255	ENSMUSG00000002043	TRAPPC6A	Trappc6a	Other	6.29	9.99918	-3.08345	1	0	4.56591e-05	0.582017
ENSG00000007264	ENSMUSG00000004933	MATK	Matk	Other	6.63278	9.17053	-1.91203	2	0	0.180001	1
ENSG00000007312	ENSMUSG00000040592	CD79B	Cd79b	Other	6.47115	0.936599	6.16027	0	0	1.08297e-10	1.6381e-06
ENSG00000007314	ENSMUSG00000001027	SCN4A	Scn4a	Alternative	3.01763	2.0343	1.60905	2	1	0.606224	1
ENSG00000007341	ENSMUSG00000045576	ST7L	St7l	Other	7.12954	9.39424	-1.63898	0	0	5.26163e-05	0.667806
ENSG00000007350	ENSMUSG00000031397	TKTL1	Tktl1	Other	3.60482	4.58889	-0.358344	0	0	0.397047	1
ENSG00000007372	ENSMUSG00000027168	PAX6	Pax6	Other	2.96616	3.79143	-0.199542	0	0	0.121425	1
ENSG00000007376	ENSMUSG00000041199	RPUSD1	Rpusd1	Other	7.77537	7.24474	1.15635	1	0	0.00220204	1
ENSG00000007384	ENSMUSG00000020282	RHBDF1	Rhbdf1	Other	1.72011	4.16288	-1.81705	0	0	0.048089	1
ENSG00000007392	ENSMUSG00000024188	LUC7L	Luc7l	Other	9.48152	11.1613	-1.05406	1	0	0.00593072	1
ENSG00000007402	ENSMUSG00000010066	CACNA2D2	Cacna2d2	Other	5.56363	5.72007	0.469281	4	0	0.877559	1
ENSG00000007516	ENSMUSG00000047507	BAIAP3	Baiap3	Other	5.57295	7.29694	-1.09827	0	0	0.00415228	1
ENSG00000007520	ENSMUSG00000015126	TSR3	Tsr3	Other	8.11376	8.83788	-0.0984001	0	0	0.670884	1
ENSG00000007541	ENSMUSG00000025728	PIGQ	Pigq	Other	7.69833	10.4175	-2.09341	0	0	0.000440402	1
ENSG00000007866	ENSMUSG00000002249	TEAD3	Tead3	Mm-Specific	3.83049	3.96308	0.493136	0	1	0.883161	1
ENSG00000007908	ENSMUSG00000026582	SELE	Sele	Other	0.363475	5.23589	-4.24669	0	0	4.45256e-05	0.568013
ENSG00000007923	ENSMUSG00000039768	DNAJC11	Dnajc11	Conserved	9.37879	10.4126	-0.408117	1	1	0.437237	1
ENSG00000007933	ENSMUSG00000026691	FMO3	Fmo3	Other	1.83195	-Inf	Inf	0	0	2.70636e-05	0.351069
ENSG00000007944	ENSMUSG00000038175	MYLIP	Mylip	Other	9.93853	9.86421	0.700044	5	2	0.264373	1
ENSG00000007952	ENSMUSG00000031257	NOX1	Nox1	Other	2.2856	7.62801	-4.71669	0	0	0.0130355	1
ENSG00000007968	ENSMUSG00000018983	E2F2	E2f2	Conserved	9.37891	10.8983	-0.893714	6	2	0.0336621	1
ENSG00000008018	ENSMUSG00000014769	PSMB1	Psmb1	Other	10.7694	12.2912	-0.896108	1	0	0.78104	1
ENSG00000008056	ENSMUSG00000037217	SYN1	Syn1	Conserved	2.43535	5.01924	-1.95817	1	1	0.000252645	1
ENSG00000008083	ENSMUSG00000038518	JARID2	Jarid2	Alternative	10.3382	13.0887	-2.12483	7	16	0.049391	1
ENSG00000008086	ENSMUSG00000031292	CDKL5	Cdkl5	Other	6.54899	6.14664	1.02808	0	0	0.0262775	1
ENSG00000008118	ENSMUSG00000016179	CAMK1G	Camk1g	Other	-0.14692	1.19106	-0.712261	0	4	0.031981	1
ENSG00000008130	ENSMUSG00000029063	NADK	Nadk	Other	9.22233	10.8372	-0.989143	1	0	0.112454	1
ENSG00000008196	ENSMUSG00000025927	TFAP2B	Tfap2b	Other	-0.157997	0.361293	0.106433	0	0	0.0375619	1
ENSG00000008197	ENSMUSG00000042596	TFAP2D	Tfap2d	Other	-1.64378	-1.52808	0.510031	0	0	0.354187	1
ENSG00000008226	ENSMUSG00000038060	DLEC1	Dlec1	Other	6.53932	2.75731	4.40774	1	1	5.89099e-07	0.00830217
ENSG00000008256	ENSMUSG00000018001	CYTH3	Cyth3	Other	7.41257	9.16368	-1.12538	0	1	0.0033411	1
ENSG00000008277	ENSMUSG00000040537	ADAM22	Adam22	Other	5.85465	6.23756	0.242815	1	0	0.994629	1
ENSG00000008282	ENSMUSG00000020570	SYPL1	Sypl	Other	8.24606	9.6002	-0.728417	2	1	0.54034	1
ENSG00000008283	ENSMUSG00000019590	CYB561	Cyb561	Other	8.34049	4.74171	4.22451	2	0	2.07253e-05	0.270652
ENSG00000008294	ENSMUSG00000020859	SPAG9	Spag9	Conserved	11.0882	12.6785	-0.964561	2	2	0.877282	1
ENSG00000008300	ENSMUSG00000023473	CELSR3	Celsr3	Conserved	7.82205	2.02809	6.41968	2	1	2.66572e-10	4.01858e-06
ENSG00000008311	ENSMUSG00000029695	AASS	Aass	Other	5.09151	-1.20616	6.92339	0	0	9.35126e-11	1.41513e-06
ENSG00000008323	ENSMUSG00000038167	PLEKHG6	Plekhg6	Other	3.61671	3.67574	0.566693	1	0	0.905594	1
ENSG00000008324	ENSMUSG00000032526	SS18L2	Ss18l2	Other	8.76762	8.14242	1.25092	1	1	0.000362492	1
ENSG00000008382	ENSMUSG00000003199	MPND	Mpnd	Other	5.99956	9.79764	-3.17236	0	1	5.74484e-09	8.50983e-05
ENSG00000008394	ENSMUSG00000008540	MGST1	Mgst1	Other	3.59277	-Inf	Inf	0	0	1.03479e-08	0.000152622
ENSG00000008405	ENSMUSG00000020038	CRY1	Cry1	Other	9.54069	9.45194	0.714479	0	0	0.127916	1
ENSG00000008438	ENSMUSG00000030413	PGLYRP1	Pglyrp1	Other	0.677039	10.2393	-8.93651	0	0	2.32089e-07	0.00331562
ENSG00000008441	ENSMUSG00000001911	NFIX	Nfix	Other	4.35155	7.67442	-2.69715	0	1	0.0020198	1
ENSG00000008513	ENSMUSG00000013846	ST3GAL1	St3gal1	Conserved	10.7267	11.231	0.121453	20	11	0.0108854	1
ENSG00000008710	ENSMUSG00000032855	PKD1	Pkd1	Other	9.72464	11.4525	-1.10218	1	0	0.67416	1
ENSG00000008735	ENSMUSG00000022619	MAPK8IP2	Mapk8ip2	Other	3.50446	3.17072	0.959459	1	0	0.399975	1
ENSG00000008838	ENSMUSG00000017210	MED24	Med24	Other	9.54415	10.1207	0.0491299	0	0	0.164217	1
ENSG00000008853	ENSMUSG00000022075	RHOBTB2	Rhobtb2	Other	6.0699	10.0746	-3.37898	1	0	1.04196e-07	0.00150313
ENSG00000008952	ENSMUSG00000027706	SEC62	Sec62	Other	10.3161	11.9838	-1.04194	1	0	0.327525	1
ENSG00000008988	ENSMUSG00000028234	RPS20	Rps20	Conserved	13.2222	14.4617	-0.613849	1	1	0.0399758	1
ENSG00000009307	ENSMUSG00000068823	CSDE1	Csde1	Conserved	12.9535	13.2581	0.321063	2	1	7.63944e-05	0.956992
ENSG00000009335	ENSMUSG00000039000	UBE3C	Ube3c	Other	10.8408	10.0074	1.4591	2	0	1.65988e-06	0.0229943
ENSG00000009413	ENSMUSG00000019841	REV3L	Rev3l	Other	9.93739	11.3147	-0.751612	3	0	0.526473	1
ENSG00000009694	ENSMUSG00000016150	TENM1	Tenm1	Other	8.58443	6.14934	3.06082	0	0	0.00170921	1
ENSG00000009709	ENSMUSG00000028736	PAX7	Pax7	Other	0.392312	-Inf	Inf	0	0	0.318102	1
ENSG00000009724	ENSMUSG00000028979	MASP2	Masp2	Other	6.0987	3.3777	3.34673	0	0	0.000623736	1
ENSG00000009765	ENSMUSG00000019762	IYD	Iyd	Other	4.50941	-Inf	Inf	2	0	1.89563e-06	0.0262071
ENSG00000009780	ENSMUSG00000028878	FAM76A	Fam76a	Other	7.62733	9.59854	-1.34549	1	4	6.17367e-05	0.778746
ENSG00000009790	ENSMUSG00000037318	TRAF3IP3	Traf3ip3	Conserved	11.2257	12.4872	-0.635757	5	2	0.991609	1
ENSG00000009830	ENSMUSG00000034126	POMT2	Pomt2	Other	6.63055	7.36859	-0.112322	0	1	0.783202	1
ENSG00000009844	ENSMUSG00000019868	VTA1	Vta1	Other	9.06331	10.3083	-0.619277	1	0	0.805082	1
ENSG00000009950	ENSMUSG00000005373	MLXIPL	Mlxipl	Other	3.1251	4.12177	-0.370943	0	0	0.00014456	1
ENSG00000009954	ENSMUSG00000002748	BAZ1B	Baz1b	Conserved	11.0138	12.441	-0.80152	1	1	0.863378	1
ENSG00000010017	ENSMUSG00000038546	RANBP9	Ranbp9	Other	9.95301	11.9879	-1.40914	4	0	0.0160638	1
ENSG00000010072	ENSMUSG00000031986	SPRTN	Sprtn	Other	8.04906	10.4961	-1.82136	0	0	8.80385e-05	1
ENSG00000010244	ENSMUSG00000017421	ZNF207	Zfp207	Other	11.8231	13.1337	-0.684876	1	0	0.650094	1
ENSG00000010256	ENSMUSG00000025651	UQCRC1	Uqcrc1	Other	9.63684	11.4952	-1.23261	0	0	0.228349	1
ENSG00000010270	ENSMUSG00000003062	STARD3NL	Stard3nl	Other	8.36708	8.77373	0.219074	2	0	0.0614341	1
ENSG00000010278	ENSMUSG00000030342	CD9	Cd9	Other	6.16481	9.58162	-2.79109	1	4	5.9111e-06	0.0797998
ENSG00000010282	ENSMUSG00000032523	HHATL	Hhatl	Other	-0.297583	-0.936323	1.26446	0	0	0.222625	1
ENSG00000010292	ENSMUSG00000038252	NCAPD2	Ncapd2	Other	10.809	11.461	-0.0262597	1	0	0.432492	1
ENSG00000010295	ENSMUSG00000038271	IFFO1	Iffo1	Other	8.55375	9.97738	-0.797903	0	0	0.12224	1
ENSG00000010310	ENSMUSG00000030406	GIPR	Gipr	Other	5.80597	5.50182	0.929872	1	0	0.0102414	1
ENSG00000010318	ENSMUSG00000021902	PHF7	Phf7	Other	6.57554	8.02538	-0.824118	1	0	0.0193636	1
ENSG00000010319	ENSMUSG00000021904	SEMA3G	Sema3g	Other	2.94434	0.987737	2.58233	0	0	0.294289	1
ENSG00000010322	ENSMUSG00000021910	NISCH	Nisch	Other	10.5389	12.9564	-1.79174	0	0	0.03315	1
ENSG00000010327	ENSMUSG00000042286	STAB1	Stab1	Other	2.33737	5.04589	-2.0828	0	0	2.39764e-05	0.312029
ENSG00000010361	ENSMUSG00000011658	FUZ	Fuz	Other	6.2323	8.85851	-2.00049	0	0	0.000164251	1
ENSG00000010379	ENSMUSG00000030108	SLC6A13	Slc6a13	Other	1.82733	3.59523	-1.14218	0	0	0.0671661	1
ENSG00000010610	ENSMUSG00000023274	CD4	Cd4	Alternative	10.5907	14.2745	-3.0581	1	2	3.42076e-05	0.44015
ENSG00000010626	ENSMUSG00000030125	LRRC23	Lrrc23	Other	5.47037	3.71117	2.38493	1	0	0.000164513	1
ENSG00000010671	ENSMUSG00000031264	BTK	Btk	Other	2.52407	0.482382	2.66742	0	0	0.22312	1
ENSG00000010704	ENSMUSG00000006611	HFE	Hfe	Other	5.88897	5.31719	1.1975	0	1	0.171676	1
ENSG00000010803	ENSMUSG00000000085	SCMH1	Scmh1	Other	7.66688	7.8812	0.411401	0	0	0.0338651	1
ENSG00000010810	ENSMUSG00000019843	FYN	Fyn	Conserved	12.1179	13.5634	-0.819765	17	12	0.124372	1
ENSG00000010818	ENSMUSG00000015501	HIVEP2	Hivep2	Conserved	11.1097	12.474	-0.738514	8	14	0.859159	1
ENSG00000010932	ENSMUSG00000040181	FMO1	Fmo1	Other	0.784701	7.70394	-6.29352	0	0	2.29956e-07	0.00328618
ENSG00000011007	ENSMUSG00000028668	ELOA	Eloa	Other	9.28731	11.3477	-1.43463	0	2	8.56847e-06	0.11474
ENSG00000011009	ENSMUSG00000028670	LYPLA2	Lypla2	Other	8.91974	10.9274	-1.38189	0	0	0.356462	1
ENSG00000011021	ENSMUSG00000029016	CLCN6	Clcn6	Other	7.92644	8.99109	-0.438931	1	1	0.634748	1
ENSG00000011028	ENSMUSG00000020695	MRC2	Mrc2	Other	6.16729	1.77256	5.02046	0	0	1.35097e-08	0.000198877
ENSG00000011052	ENSMUSG00000091228	NME1-NME2	Gm20390	Other	9.1821	11.0569	-1.24904	1	0	0.0332395	1
ENSG00000011083	ENSMUSG00000052026	SLC6A7	Slc6a7	Other	0.22124	-Inf	Inf	0	0	0.275154	1
ENSG00000011105	ENSMUSG00000030352	TSPAN9	Tspan9	Other	2.0809	3.34816	-0.641539	0	1	0.154985	1
ENSG00000011114	ENSMUSG00000041702	BTBD7	Btbd7	Other	8.88033	10.8019	-1.29588	0	1	0.0109646	1
ENSG00000011132	ENSMUSG00000004931	APBA3	Apba3	Conserved	8.54305	8.71899	0.449786	1	1	0.010846	1
ENSG00000011143	ENSMUSG00000034121	MKS1	Mks1	Other	6.52147	8.01178	-0.864588	0	0	0.21566	1
ENSG00000011198	ENSMUSG00000032540	ABHD5	Abhd5	Other	8.01314	8.39617	0.24269	2	0	0.371193	1
ENSG00000011243	ENSMUSG00000002625	AKAP8L	Akap8l	Other	9.29502	10.4164	-0.495644	1	0	0.622348	1
ENSG00000011258	ENSMUSG00000059474	MBTD1	Mbtd1	Other	8.93697	11.3019	-1.73924	1	2	0.00115274	1
ENSG00000011260	ENSMUSG00000054079	UTP18	Utp18	Other	9.44249	10.0968	-0.028637	0	0	0.0700543	1
ENSG00000011275	ENSMUSG00000045078	RNF216	Rnf216	Other	10.3873	8.93684	2.07615	5	0	9.84218e-06	0.131255
ENSG00000011295	ENSMUSG00000042298	TTC19	Ttc19	Other	9.37082	9.57314	0.423404	1	0	0.00418021	1
ENSG00000011304	ENSMUSG00000006498	PTBP1	Ptbp1	Other	11.4643	13.2486	-1.15858	1	0	0.715197	1
ENSG00000011332	ENSMUSG00000030584	DPF1	Dpf1	Other	4.02364	4.20714	0.442221	1	0	0.573604	1
ENSG00000011347	ENSMUSG00000024743	SYT7	Syt7	Other	1.43276	3.21288	-1.1544	1	0	0.0178574	1
ENSG00000011376	ENSMUSG00000035202	LARS2	Lars2	Other	8.23558	16.2737	-7.41242	1	1	0.0155506	1
ENSG00000011405	ENSMUSG00000030660	PIK3C2A	Pik3c2a	Other	9.91934	10.6549	-0.109801	0	0	0.335172	1
ENSG00000011422	ENSMUSG00000046223	PLAUR	Plaur	Other	5.99246	3.82273	2.79545	0	1	8.4403e-05	1
ENSG00000011426	ENSMUSG00000036777	ANLN	Anln	Other	8.74195	9.0638	0.303879	2	0	0.567011	1
ENSG00000011451	ENSMUSG00000024050	WIZ	Wiz	Conserved	8.28068	10.471	-1.56456	2	1	0.00331969	1
ENSG00000011454	ENSMUSG00000035437	RABGAP1	Rabgap1	Other	9.4358	10.7823	-0.720773	0	0	0.680913	1
ENSG00000011465	ENSMUSG00000019929	DCN	Dcn	Other	2.7264	4.53158	-1.17946	0	0	0.928884	1
ENSG00000011478	ENSMUSG00000030407	QPCTL	Qpctl	Other	6.85834	7.83528	-0.351218	1	0	0.386118	1
ENSG00000011523	ENSMUSG00000044066	CEP68	Cep68	Other	8.58811	10.4669	-1.25305	0	0	0.0526753	1
ENSG00000011566	ENSMUSG00000024242	MAP4K3	Map4k3	Other	7.67033	8.26703	0.0290255	0	3	0.268537	1
ENSG00000011590	ENSMUSG00000006310	ZBTB32	Zbtb32	Other	8.21272	9.60063	-0.762186	1	2	0.765099	1
ENSG00000011600	ENSMUSG00000030579	TYROBP	Tyrobp	Other	1.86964	2.88936	-0.393998	0	2	0.0084279	1
ENSG00000011638	ENSMUSG00000030917	TMEM159	Tmem159	Other	6.18142	10.7059	-3.8988	0	0	3.02434e-05	0.390775
ENSG00000011677	ENSMUSG00000031343	GABRA3	Gabra3	Other	2.09045	1.49568	1.22049	0	0	0.465388	1
ENSG00000012048	ENSMUSG00000017146	BRCA1	Brca1	Other	8.89069	9.14763	0.368779	0	0	0.387843	1
ENSG00000012061	ENSMUSG00000003549	ERCC1	Ercc1	Conserved	8.27494	9.15909	-0.258434	5	2	0.415501	1
ENSG00000012124	ENSMUSG00000030577	CD22	Cd22	Other	3.95362	5.82869	-1.24935	0	1	0.0365383	1
ENSG00000012171	ENSMUSG00000057969	SEMA3B	Sema3b	Other	3.73738	8.58709	-4.22398	0	1	0.000181351	1
ENSG00000012174	ENSMUSG00000046873	MBTPS2	Mbtps2	Other	7.25604	9.93606	-2.0543	1	0	3.28885e-06	0.0449256
ENSG00000012211	ENSMUSG00000031145	PRICKLE3	Prickle3	Other	5.75649	9.93088	-3.54866	0	0	6.00892e-14	9.24472e-10
ENSG00000012223	ENSMUSG00000032496	LTF	Ltf	Other	1.64274	-2.04249	4.31095	1	0	0.0756809	1
ENSG00000012232	ENSMUSG00000021978	EXTL3	Extl3	Other	8.10523	10.7217	-1.99075	2	4	0.0064647	1
ENSG00000012504	ENSMUSG00000047638	NR1H4	Nr1h4	Other	0.357412	-Inf	Inf	0	0	0.0228216	1
ENSG00000012660	ENSMUSG00000032349	ELOVL5	Elovl5	Conserved	10.9951	13.1698	-1.54891	3	3	0.004397	1
ENSG00000012779	ENSMUSG00000025701	ALOX5	Alox5	Other	6.70297	-0.403792	7.73249	1	0	2.98628e-09	4.44029e-05
ENSG00000012817	ENSMUSG00000056673	KDM5D	Kdm5d	Other	9.64806	7.37792	2.89586	0	0	0.0516855	1
ENSG00000012822	ENSMUSG00000023055	CALCOCO1	Calcoco1	Conserved	9.30831	10.1577	-0.223652	2	2	0.839592	1
ENSG00000012983	ENSMUSG00000034761	MAP4K5	Map4k5	Other	9.07721	8.44397	1.25896	1	3	1.58035e-05	0.208022
ENSG00000013275	ENSMUSG00000030603	PSMC4	Psmc4	Other	9.75545	11.0352	-0.653983	2	0	0.992691	1
ENSG00000013288	ENSMUSG00000029119	MAN2B2	Man2b2	Other	9.06991	10.5888	-0.893148	0	3	0.838774	1
ENSG00000013293	ENSMUSG00000069072	SLC7A14	Slc7a14	Other	4.48515	3.26029	1.85059	0	0	0.0186148	1
ENSG00000013306	ENSMUSG00000018677	SLC25A39	Slc25a39	Conserved	9.61888	9.99147	0.253135	2	1	0.0501709	1
ENSG00000013364	ENSMUSG00000030681	MVP	Mvp	Other	10.7811	10.2983	1.10857	0	0	0.000106626	1
ENSG00000013374	ENSMUSG00000028954	NUB1	Nub1	Other	9.98721	11.6338	-1.02087	1	2	0.0637087	1
ENSG00000013375	ENSMUSG00000056131	PGM3	Pgm3	Other	8.49668	8.18737	0.935037	0	0	0.00831944	1
ENSG00000013392	ENSMUSG00000032417	RWDD2A	Rwdd2a	Other	5.51577	5.71717	0.424323	0	0	0.836115	1
ENSG00000013441	ENSMUSG00000026034	CLK1	Clk1	Other	12.2398	13.3591	-0.493558	1	0	0.695285	1
ENSG00000013503	ENSMUSG00000034453	POLR3B	Polr3b	Conserved	7.00413	9.69716	-2.06731	2	2	4.25525e-05	0.543907
ENSG00000013523	ENSMUSG00000021257	ANGEL1	Angel1	Other	7.73404	7.35256	1.00721	1	0	0.0074197	1
ENSG00000013561	ENSMUSG00000060450	RNF14	Rnf14	Other	8.31383	11.217	-2.2775	0	1	4.41631e-06	0.0599779
ENSG00000013563	ENSMUSG00000019088	DNASE1L1	Dnase1l1	Other	7.35062	7.87601	0.100332	1	0	0.685285	1
ENSG00000013573	ENSMUSG00000035842	DDX11	Ddx11	Other	9.54814	8.52045	1.65341	1	1	1.89853e-07	0.00272003
ENSG00000013583	ENSMUSG00000042770	HEBP1	Hebp1	Other	5.66726	1.58702	4.70596	1	0	1.27502e-08	0.000187785
ENSG00000013588	ENSMUSG00000046733	GPRC5A	Gprc5a	Other	4.5565	4.38507	0.797148	0	0	0.0865573	1
ENSG00000013619	ENSMUSG00000059401	MAMLD1	Mamld1	Other	7.04155	-1.07937	8.74664	0	0	6.52358e-08	0.000946114
ENSG00000013725	ENSMUSG00000024670	CD6	Cd6	Alternative	12.0288	12.6664	-0.0118418	6	3	0.184549	1
ENSG00000013810	ENSMUSG00000037313	TACC3	Tacc3	Other	10.4479	11.247	-0.173433	0	0	0.141556	1
ENSG00000014123	ENSMUSG00000040359	UFL1	Ufl1	Conserved	9.77472	9.80307	0.597374	3	1	0.00140964	1
ENSG00000014164	ENSMUSG00000075600	ZC3H3	Zc3h3	Other	7.31116	9.23779	-1.30091	1	1	0.26071	1
ENSG00000014216	ENSMUSG00000024942	CAPN1	Capn1	Other	9.8448	11.6741	-1.20359	0	0	0.253926	1
ENSG00000014257	ENSMUSG00000032561	ACPP	Acpp	Other	3.6387	8.63793	-4.3735	0	0	5.16133e-08	0.000750561
ENSG00000014641	ENSMUSG00000020321	MDH1	Mdh1	Other	10.9949	11.7271	-0.106519	2	0	0.260055	1
ENSG00000014824	ENSMUSG00000029221	SLC30A9	Slc30a9	Other	9.33895	10.601	-0.63635	0	0	0.191826	1
ENSG00000014914	ENSMUSG00000045934	MTMR11	Mtmr11	Other	5.55826	5.52655	0.657438	0	0	0.842451	1
ENSG00000014919	ENSMUSG00000040018	COX15	Cox15	Other	8.39357	9.17328	-0.153987	1	0	0.468594	1
ENSG00000015133	ENSMUSG00000021182	CCDC88C	Ccdc88c	Conserved	10.9748	12.4391	-0.838631	16	7	0.749922	1
ENSG00000015153	ENSMUSG00000022634	YAF2	Yaf2	Other	8.7225	10.0128	-0.664535	2	0	0.89107	1
ENSG00000015171	ENSMUSG00000021156	ZMYND11	Zmynd11	Other	9.28786	11.4384	-1.52478	0	2	0.00194591	1
ENSG00000015285	ENSMUSG00000031165	WAS	Was	Other	9.38967	11.339	-1.32359	1	0	0.00804912	1
ENSG00000015413	ENSMUSG00000019278	DPEP1	Dpep1	Other	0.0185472	-0.668581	1.31285	0	0	0.204736	1
ENSG00000015475	ENSMUSG00000004446	BID	Bid	Other	7.62979	7.81846	0.437051	2	0	0.073594	1
ENSG00000015520	ENSMUSG00000020447	NPC1L1	Npc1l1	Other	2.21093	1.73842	1.09823	0	0	0.46798	1
ENSG00000015532	ENSMUSG00000020868	XYLT2	Xylt2	Other	7.96829	9.64025	-1.04623	0	0	0.168669	1
ENSG00000015592	ENSMUSG00000022044	STMN4	Stmn4	Other	1.86018	-2.39489	4.88079	0	0	2.08645e-05	0.272365
ENSG00000015676	ENSMUSG00000053838	NUDCD3	Nudcd3	Alternative	9.22689	10.2677	-0.415092	1	1	0.692255	1
ENSG00000016082	ENSMUSG00000042258	ISL1	Isl1	Other	-1.64705	0.471636	-1.49296	0	0	0.0227733	1
ENSG00000016391	ENSMUSG00000015970	CHDH	Chdh	Other	3.3314	0.870457	3.08667	0	0	0.0064191	1
ENSG00000016402	ENSMUSG00000020007	IL20RA	Il20ra	Conserved	-0.459198	-1.84665	2.01317	1	3	0.41905	1
ENSG00000016490	ENSMUSG00000028255	CLCA1	Clca1	Other	-1.63249	-Inf	Inf	0	0	0.454586	1
ENSG00000016864	ENSMUSG00000021916	GLT8D1	Glt8d1	Other	8.53718	8.44859	0.714313	0	0	0.00276103	1
ENSG00000017260	ENSMUSG00000032570	ATP2C1	Atp2c1	Other	10.0425	10.8239	-0.155665	2	0	0.0398631	1
ENSG00000017427	ENSMUSG00000020053	IGF1	Igf1	Other	-0.0540643	1.79076	-1.2191	2	0	0.00119184	1
ENSG00000017483	ENSMUSG00000031170	SLC38A5	Slc38a5	Other	8.32134	-0.854988	9.80205	0	0	5.60752e-16	8.65352e-12
ENSG00000018189	ENSMUSG00000029291	RUFY3	Rufy3	Other	7.73379	7.93208	0.427434	0	0	0.00721117	1
ENSG00000018236	ENSMUSG00000055022	CNTN1	Cntn1	Other	1.35292	4.64186	-2.66322	0	1	3.35025e-10	5.04246e-06
ENSG00000018280	ENSMUSG00000026177	SLC11A1	Slc11a1	Conserved	4.86291	1.10005	4.38859	3	1	5.49951e-06	0.0743534
ENSG00000018408	ENSMUSG00000027803	WWTR1	Wwtr1	Other	5.55898	0.0906842	6.09402	0	0	4.43177e-06	0.0601834
ENSG00000018510	ENSMUSG00000042410	AGPS	Agps	Other	9.91221	11.2253	-0.68733	1	0	0.327845	1
ENSG00000018610	ENSMUSG00000006423	CXorf56	C330007P06Rik	Other	8.07965	10.583	-1.87762	1	0	2.06029e-05	0.269135
ENSG00000018625	ENSMUSG00000007097	ATP1A2	Atp1a2	Other	2.84019	3.65646	-0.190547	0	0	0.415024	1
ENSG00000018869	ENSMUSG00000109398	ZNF582	Gm3854	Other	4.74988	5.83216	-0.456554	0	0	0.421778	1
ENSG00000019102	ENSMUSG00000001943	VSIG2	Vsig2	Other	0.890765	-3.72587	5.24236	0	0	0.0252951	1
ENSG00000019144	ENSMUSG00000048537	PHLDB1	Phldb1	Other	5.51283	7.14288	-1.00433	0	1	0.00848309	1
ENSG00000019169	ENSMUSG00000026390	MARCO	Marco	Other	0.33624	-Inf	Inf	0	0	0.506775	1
ENSG00000019186	ENSMUSG00000038567	CYP24A1	Cyp24a1	Other	2.31853	-3.93358	6.87783	0	0	0.00207671	1
ENSG00000019485	ENSMUSG00000075028	PRDM11	Prdm11	Conserved	5.32703	7.83153	-1.87877	4	1	1.96683e-05	0.25732
ENSG00000019505	ENSMUSG00000027220	SYT13	Syt13	Other	1.30342	3.08142	-1.15228	0	0	0.0128222	1
ENSG00000019549	ENSMUSG00000022676	SNAI2	Snai2	Other	-1.70442	2.28097	-3.35967	1	0	0.000465094	1
ENSG00000019582	ENSMUSG00000024610	CD74	Cd74	Other	12.1014	8.22229	4.50484	0	0	5.23249e-10	7.85448e-06
ENSG00000019991	ENSMUSG00000028864	HGF	Hgf	Other	0.692007	0.798491	0.519239	0	0	0.678872	1
ENSG00000019995	ENSMUSG00000030967	ZRANB1	Zranb1	Other	9.31543	10.4591	-0.517935	1	0	0.553439	1
ENSG00000020129	ENSMUSG00000028833	NCDN	Ncdn	Other	8.39309	10.3914	-1.3726	0	0	0.0489825	1
ENSG00000020181	ENSMUSG00000031486	ADGRA2	Adgra2	Other	3.41554	3.45077	0.590491	0	0	0.340541	1
ENSG00000020256	ENSMUSG00000027551	ZFP64	Zfp64	Alternative	6.62273	8.94623	-1.69777	6	1	5.26251e-07	0.00743277
ENSG00000020426	ENSMUSG00000021103	MNAT1	Mnat1	Other	7.61539	9.1818	-0.940678	3	0	0.0382522	1
ENSG00000020577	ENSMUSG00000021838	SAMD4A	Samd4	Other	6.82043	5.71504	1.73111	1	1	0.00336186	1
ENSG00000020633	ENSMUSG00000070691	RUNX3	Runx3	Conserved	11.7403	12.7176	-0.351577	19	9	0.624246	1
ENSG00000020922	ENSMUSG00000031928	MRE11	Mre11a	Other	9.12216	9.88237	-0.134485	1	0	0.347828	1
ENSG00000021300	ENSMUSG00000030701	PLEKHB1	Plekhb1	Other	6.14265	4.03462	2.73376	0	0	0.000121877	1
ENSG00000021488	ENSMUSG00000030492	SLC7A9	Slc7a9	Other	2.03056	-Inf	Inf	0	0	0.000138973	1
ENSG00000021574	ENSMUSG00000024068	SPAST	Spast	Other	9.11042	10.3227	-0.586571	1	1	0.848551	1
ENSG00000021645	ENSMUSG00000066392	NRXN3	Nrxn3	Other	3.50356	-0.96163	5.09091	0	0	8.17178e-05	1
ENSG00000021762	ENSMUSG00000037606	OSBPL5	Osbpl5	Other	5.03601	9.57401	-3.91228	0	1	3.38104e-10	5.08779e-06
ENSG00000021776	ENSMUSG00000040383	AQR	Aqr	Other	10.479	11.812	-0.707254	1	1	0.910618	1
ENSG00000021826	ENSMUSG00000025991	CPS1	Cps1	Other	2.54437	-Inf	Inf	0	0	0.000113946	1
ENSG00000021852	ENSMUSG00000029656	C8B	C8b	Other	-0.806891	-3.59323	3.41206	0	0	0.49131	1
ENSG00000022267	ENSMUSG00000023092	FHL1	Fhl1	Other	7.37304	3.49599	4.50278	0	0	1.89966e-07	0.00272127
ENSG00000022277	ENSMUSG00000027502	RTF2	Rtf2	Conserved	10.1127	10.9639	-0.225422	1	1	0.483402	1
ENSG00000022355	ENSMUSG00000010803	GABRA1	Gabra1	Other	0.549129	-2.02209	3.19695	0	0	0.32884	1
ENSG00000022556	ENSMUSG00000035177	NLRP2	Nlrp2	Other	8.19451	-Inf	Inf	0	0	8.37149e-10	1.25405e-05
ENSG00000022567	ENSMUSG00000079020	SLC45A4	Slc45a4	Other	7.88908	8.87346	-0.358657	1	3	0.383039	1
ENSG00000022840	ENSMUSG00000041740	RNF10	Rnf10	Other	10.5601	11.3876	-0.201783	0	1	0.298378	1
ENSG00000022976	ENSMUSG00000021271	ZNF839	Zfp839	Other	7.8634	7.92283	0.566292	2	1	0.039739	1
ENSG00000023041	ENSMUSG00000024982	ZDHHC6	Zdhhc6	Other	9.47869	10.2985	-0.194094	0	0	0.236153	1
ENSG00000023171	ENSMUSG00000040111	GRAMD1B	Gramd1b	Conserved	9.69666	11.9376	-1.61523	7	7	0.0105445	1
ENSG00000023191	ENSMUSG00000038650	RNH1	Rnh1	Other	9.63536	11.034	-0.772868	0	1	0.886492	1
ENSG00000023228	ENSMUSG00000025968	NDUFS1	Ndufs1	Other	10.1959	11.2076	-0.385963	1	0	0.171654	1
ENSG00000023287	ENSMUSG00000025907	RB1CC1	Rb1cc1	Other	10.7455	11.7273	-0.35613	3	0	0.669702	1
ENSG00000023318	ENSMUSG00000028343	ERP44	Erp44	Other	9.04799	11.0374	-1.36369	1	2	0.0554672	1
ENSG00000023330	ENSMUSG00000032786	ALAS1	Alas1	Other	8.84582	9.13155	0.339995	1	0	0.0292848	1
ENSG00000023445	ENSMUSG00000032000	BIRC3	Birc3	Conserved	13.0275	12.0459	1.60728	1	1	3.43652e-07	0.00487882
ENSG00000023516	ENSMUSG00000022016	AKAP11	Akap11	Conserved	10.1299	11.2518	-0.496187	6	5	0.604329	1
ENSG00000023572	ENSMUSG00000018196	GLRX2	Glrx2	Other	8.39498	10.1887	-1.16799	0	0	0.0383805	1
ENSG00000023697	ENSMUSG00000030225	DERA	Dera	Other	7.53624	10.128	-1.96602	0	4	6.89735e-05	0.866859
ENSG00000023734	ENSMUSG00000030224	STRAP	Strap	Other	10.4889	12.0791	-0.96448	0	0	0.717876	1
ENSG00000023839	ENSMUSG00000025194	ABCC2	Abcc2	Other	5.85481	2.46668	4.01385	0	0	6.65436e-06	0.0896143
ENSG00000023892	ENSMUSG00000002257	DEF6	Def6	Conserved	11.0839	12.0837	-0.374078	5	5	0.975181	1
ENSG00000023902	ENSMUSG00000015745	PLEKHO1	Plekho1	Other	9.73016	7.10779	3.2481	1	0	3.66492e-07	0.00519722
ENSG00000023909	ENSMUSG00000028124	GCLM	Gclm	Other	8.75598	9.65459	-0.272895	1	0	0.409631	1
ENSG00000024048	ENSMUSG00000023977	UBR2	Ubr2	Other	10.5447	11.9609	-0.790459	1	5	0.50701	1
ENSG00000024422	ENSMUSG00000074364	EHD2	Ehd2	Conserved	4.13043	4.0459	0.710249	1	2	0.554508	1
ENSG00000024526	ENSMUSG00000028175	DEPDC1	Depdc1a	Other	7.7936	9.33737	-0.918056	0	0	0.362073	1
ENSG00000024862	ENSMUSG00000059554	CCDC28A	Ccdc28a	Other	7.61055	8.91936	-0.683087	0	0	0.359945	1
ENSG00000025039	ENSMUSG00000028278	RRAGD	Rragd	Other	7.35841	7.87289	0.111244	1	1	0.2533	1
ENSG00000025156	ENSMUSG00000019878	HSF2	Hsf2	Other	8.41819	8.95718	0.0867363	0	1	0.0755732	1
ENSG00000025293	ENSMUSG00000038116	PHF20	Phf20	Other	9.58412	10.0475	0.162296	1	0	0.0150082	1
ENSG00000025423	ENSMUSG00000025396	HSD17B6	Hsd17b6	Other	3.70876	-3.59323	7.92771	0	0	3.53093e-06	0.048176
ENSG00000025434	ENSMUSG00000002108	NR1H3	Nr1h3	Other	5.07014	5.72271	-0.0268473	1	1	0.629353	1
ENSG00000025708	ENSMUSG00000022615	TYMP	Tymp	Hs-Specific	8.90375	5.90246	3.62702	3	0	3.66735e-07	0.0052003
ENSG00000025770	ENSMUSG00000008690	NCAPH2	Ncaph2	Other	9.55304	11.5717	-1.39299	1	0	0.0838374	1
ENSG00000025772	ENSMUSG00000018322	TOMM34	Tomm34	Other	8.32338	10.681	-1.73193	0	0	3.72935e-06	0.0508422
ENSG00000025796	ENSMUSG00000019802	SEC63	Sec63	Other	9.81266	11.2946	-0.856264	0	0	0.0941071	1
ENSG00000025800	ENSMUSG00000003731	KPNA6	Kpna6	Other	10.5895	10.4077	0.807496	0	0	0.000107428	1
ENSG00000026025	ENSMUSG00000026728	VIM	Vim	Conserved	13.3042	15.5305	-1.6006	5	4	0.943956	1
ENSG00000026103	ENSMUSG00000024778	FAS	Fas	Conserved	9.63963	10.3377	-0.0723677	2	3	0.0390787	1
ENSG00000026508	ENSMUSG00000005087	CD44	Cd44	Conserved	12.9099	12.6953	0.840283	13	10	0.0112067	1
ENSG00000026559	ENSMUSG00000074575	KCNG1	Kcng1	Other	2.78576	-3.4947	6.90618	0	0	3.50002e-06	0.0477613
ENSG00000026652	ENSMUSG00000023827	AGPAT4	Agpat4	Alternative	7.93205	8.53291	0.0248664	1	5	0.096166	1
ENSG00000026751	ENSMUSG00000038179	SLAMF7	Slamf7	Conserved	9.74826	11.7848	-1.41078	6	5	0.489042	1
ENSG00000026950	ENSMUSG00000108763	BTN3A1	Gm36028	Other	11.0333	3.06046	8.59857	0	0	3.56258e-12	5.44718e-08
ENSG00000027001	ENSMUSG00000021993	MIPEP	Mipep	Other	6.56499	7.93031	-0.739599	1	0	0.0117147	1
ENSG00000027644	ENSMUSG00000005640	INSRR	Insrr	Other	2.3556	5.72972	-2.7484	0	0	0.0180311	1
ENSG00000027697	ENSMUSG00000020009	IFNGR1	Ifngr1	Conserved	9.25926	13.782	-3.89706	3	5	9.61691e-09	0.000141936
ENSG00000027847	ENSMUSG00000021504	B4GALT7	B4galt7	Other	8.08399	9.17085	-0.46114	1	0	0.228663	1
ENSG00000027869	ENSMUSG00000028071	SH2D2A	Sh2d2a	Other	9.34723	13.6276	-3.65462	1	1	7.80248e-06	0.104717
ENSG00000028116	ENSMUSG00000064090	VRK2	Vrk2	Alternative	8.11573	9.18857	-0.44712	1	3	0.390814	1
ENSG00000028137	ENSMUSG00000028599	TNFRSF1B	Tnfrsf1b	Conserved	11.2249	12.4265	-0.575814	6	3	0.170417	1
ENSG00000028203	ENSMUSG00000036099	VEZT	Vezt	Other	9.42983	8.77897	1.27658	1	0	1.28694e-06	0.0179336
ENSG00000028277	ENSMUSG00000008496	POU2F2	Pou2f2	Conserved	8.59031	11.0802	-1.86412	1	3	0.0290032	1
ENSG00000028310	ENSMUSG00000057649	BRD9	Brd9	Other	10.2266	10.8318	0.020469	0	1	0.127439	1
ENSG00000028528	ENSMUSG00000032382	SNX1	Snx1	Other	10.0299	10.4242	0.23142	2	0	0.0340056	1
ENSG00000028839	ENSMUSG00000071359	TBPL1	Tbpl1	Other	8.31047	10.195	-1.25879	2	0	0.0115419	1
ENSG00000029153	ENSMUSG00000040187	ARNTL2	Arntl2	Other	9.61331	7.39794	2.84109	0	2	0.0875735	1
ENSG00000029363	ENSMUSG00000037608	BCLAF1	Bclaf1	Conserved	11.9307	12.7014	-0.144966	3	2	0.0174929	1
ENSG00000029364	ENSMUSG00000048833	SLC39A9	Slc39a9	Other	9.71201	10.3856	-0.0478584	0	0	0.0203728	1
ENSG00000029534	ENSMUSG00000031543	ANK1	Ank1	Other	7.0678	3.70884	3.98469	0	1	7.79003e-07	0.0109403
ENSG00000029559	ENSMUSG00000029306	IBSP	Ibsp	Other	-2.62555	-Inf	Inf	0	0	0.274616	1
ENSG00000029639	ENSMUSG00000036983	TFB1M	Tfb1m	Other	6.93519	7.00514	0.555776	0	0	0.269324	1
ENSG00000029725	ENSMUSG00000020817	RABEP1	Rabep1	Other	10.0272	9.71688	0.936028	2	0	5.63367e-05	0.713167
ENSG00000030066	ENSMUSG00000051329	NUP160	Nup160	Other	10.2861	10.3115	0.600349	1	0	0.000477105	1
ENSG00000030110	ENSMUSG00000057789	BAK1	Bak1	Other	9.32503	10.5564	-0.605636	3	0	0.611495	1
ENSG00000030304	ENSMUSG00000057280	MUSK	Musk	Other	-0.654248	-1.85568	1.82715	0	0	0.136257	1
ENSG00000030419	ENSMUSG00000025997	IKZF2	Ikzf2	Other	7.10798	8.03727	-0.303569	0	2	0.69191	1
ENSG00000030582	ENSMUSG00000034708	GRN	Grn	Other	7.49591	9.4999	-1.37826	0	0	0.00191254	1
ENSG00000031003	ENSMUSG00000036501	FAM13B	Fam13b	Conserved	9.49641	10.3456	-0.22349	1	1	0.335455	1
ENSG00000031081	ENSMUSG00000022799	ARHGAP31	Arhgap31	Other	6.45135	9.04813	-1.97105	3	2	0.000890247	1
ENSG00000031691	ENSMUSG00000023919	CENPQ	Cenpq	Other	7.08001	9.22537	-1.51963	0	0	0.00274027	1
ENSG00000031698	ENSMUSG00000068739	SARS	Sars	Other	10.6762	11.2362	0.065714	0	0	0.0313421	1
ENSG00000032219	ENSMUSG00000048118	ARID4A	Arid4a	Other	9.77886	12.513	-2.10841	0	1	0.0297827	1
ENSG00000032389	ENSMUSG00000036613	EIPR1	Eipr1	Other	8.30821	9.54431	-0.610376	2	0	0.538373	1
ENSG00000032444	ENSMUSG00000004565	PNPLA6	Pnpla6	Other	10.0258	9.9075	0.744033	2	0	0.000658005	1
ENSG00000032742	ENSMUSG00000040040	IFT88	Ift88	Other	6.54722	7.27374	-0.10079	1	0	0.695242	1
ENSG00000033030	ENSMUSG00000029427	ZCCHC8	Zcchc8	Other	9.3339	10.6262	-0.666594	1	0	0.504886	1
ENSG00000033100	ENSMUSG00000038181	CHPF2	Chpf2	Other	9.75009	10.0643	0.311489	1	0	0.0274688	1
ENSG00000033122	ENSMUSG00000028176	LRRC7	Lrrc7	Other	5.3944	3.36092	2.65921	0	0	0.00705256	1
ENSG00000033170	ENSMUSG00000021065	FUT8	Fut8	Conserved	10.7437	9.67295	1.69646	7	5	0.00617442	1
ENSG00000033178	ENSMUSG00000035898	UBA6	Uba6	Other	10.706	10.2427	1.08907	1	0	4.87028e-05	0.619841
ENSG00000033327	ENSMUSG00000004508	GAB2	Gab2	Other	9.00983	6.94662	2.68893	1	0	0.000181841	1
ENSG00000033627	ENSMUSG00000019302	ATP6V0A1	Atp6v0a1	Conserved	7.17809	6.22317	1.58064	2	1	0.000418032	1
ENSG00000033800	ENSMUSG00000032405	PIAS1	Pias1	Other	9.95719	11.3196	-0.736729	0	0	0.477633	1
ENSG00000033867	ENSMUSG00000021733	SLC4A7	Slc4a7	Other	10.4587	12.0105	-0.926142	1	3	0.837558	1
ENSG00000034053	ENSMUSG00000030519	APBA2	Apba2	Other	7.75619	-0.289429	8.67134	2	0	2.67411e-05	0.347019
ENSG00000034152	ENSMUSG00000018932	MAP2K3	Map2k3	Conserved	10.2317	12.3169	-1.45944	1	1	0.67186	1
ENSG00000034239	ENSMUSG00000068617	EFCAB1	Efcab1	Other	2.50806	0.545873	2.58791	0	0	0.741559	1
ENSG00000034533	ENSMUSG00000032567	ASTE1	Aste1	Other	7.52711	9.1052	-0.95237	0	0	0.0655773	1
ENSG00000034677	ENSMUSG00000022280	RNF19A	Rnf19a	Alternative	12.7251	12.2296	1.12128	2	5	0.0183512	1
ENSG00000034693	ENSMUSG00000019809	PEX3	Pex3	Other	7.54046	9.10171	-0.935526	0	0	0.0333586	1
ENSG00000034713	ENSMUSG00000031950	GABARAPL2	Gabarapl2	Other	8.76016	11.2124	-1.82655	0	1	0.00147691	1
ENSG00000034971	ENSMUSG00000026697	MYOC	Myoc	Other	-1.51761	-2.75339	1.8615	0	0	0.407886	1
ENSG00000035115	ENSMUSG00000020669	SH3YL1	Sh3yl1	Hs-Specific	8.22542	5.04498	3.80616	2	0	1.28412e-09	1.91924e-05
ENSG00000035141	ENSMUSG00000057497	FAM136A	Fam136a	Other	9.04671	8.49493	1.17749	1	0	0.000175526	1
ENSG00000035403	ENSMUSG00000021823	VCL	Vcl	Alternative	9.05543	7.56813	2.11302	4	2	0.000358167	1
ENSG00000035499	ENSMUSG00000021697	DEPDC1B	Depdc1b	Other	8.07369	7.21855	1.48086	0	1	0.615459	1
ENSG00000035664	ENSMUSG00000032380	DAPK2	Dapk2	Conserved	5.90839	8.23764	-1.70353	4	3	0.0011411	1
ENSG00000035681	ENSMUSG00000028245	NSMAF	Nsmaf	Other	9.72845	11.0564	-0.702252	0	0	0.115282	1
ENSG00000035687	ENSMUSG00000015961	ADSS	Adss	Other	10.4088	11.7381	-0.703632	1	0	0.568328	1
ENSG00000035720	ENSMUSG00000029254	STAP1	Stap1	Conserved	6.8997	11.0322	-3.50673	1	1	5.43859e-07	0.00767548
ENSG00000035862	ENSMUSG00000017466	TIMP2	Timp2	Other	5.12974	10.3048	-4.54933	0	2	1.64942e-05	0.216767
ENSG00000035928	ENSMUSG00000029191	RFC1	Rfc1	Other	10.5852	10.6631	0.547781	2	0	0.00584509	1
ENSG00000036054	ENSMUSG00000022749	TBC1D23	Tbc1d23	Other	9.20636	10.0746	-0.242514	0	0	0.643352	1
ENSG00000036257	ENSMUSG00000004364	CUL3	Cul3	Other	10.4498	12.536	-1.46052	1	3	0.00460893	1
ENSG00000036448	ENSMUSG00000031461	MYOM2	Myom2	Other	4.94943	3.92642	1.64873	9	0	0.228968	1
ENSG00000036473	ENSMUSG00000031173	OTC	Otc	Other	-3.66643	-3.93358	0.892868	0	0	0.115201	1
ENSG00000036530	ENSMUSG00000021259	CYP46A1	Cyp46a1	Other	5.77352	-0.685015	7.08425	2	0	1.13643e-09	1.69953e-05
ENSG00000036565	ENSMUSG00000036330	SLC18A1	Slc18a1	Other	0.0220931	2.05875	-1.41093	0	1	0.00813946	1
ENSG00000036672	ENSMUSG00000032010	USP2	Usp2	Other	2.19374	7.4044	-4.58494	2	1	0.000767408	1
ENSG00000036828	ENSMUSG00000051980	CASR	Casr	Other	5.33657	1.5431	4.4192	1	4	1.33894e-08	0.000197131
ENSG00000037042	ENSMUSG00000045007	TUBG2	Tubg2	Other	5.47883	5.35604	0.748508	0	0	0.245346	1
ENSG00000037280	ENSMUSG00000020357	FLT4	Flt4	Other	5.55864	5.32081	0.863554	0	0	0.547503	1
ENSG00000037474	ENSMUSG00000021595	NSUN2	Nsun2	Other	10.7261	11.632	-0.280157	0	0	0.11284	1
ENSG00000037637	ENSMUSG00000028920	FBXO42	Fbxo42	Other	8.76376	9.53226	-0.142782	0	0	0.241991	1
ENSG00000037749	ENSMUSG00000020522	MFAP3	Mfap3	Other	8.34875	10.4257	-1.45123	2	0	1.26308e-05	0.167257
ENSG00000037757	ENSMUSG00000004996	MRI1	Mri1	Other	8.12036	9.66198	-0.915891	0	0	0.717533	1
ENSG00000037897	ENSMUSG00000006732	METTL1	Mettl1	Other	7.01456	7.90795	-0.267672	0	0	0.540011	1
ENSG00000037965	ENSMUSG00000001657	HOXC8	Hoxc8	Other	-1.19463	2.28933	-2.85824	0	0	0.000200623	1
ENSG00000038002	ENSMUSG00000031521	AGA	Aga	Conserved	7.9327	8.70288	-0.144457	1	1	0.192796	1
ENSG00000038219	ENSMUSG00000061755	BOD1L1	Bod1l	Other	11.1785	12.6999	-0.895617	2	0	0.995043	1
ENSG00000038274	ENSMUSG00000042032	MAT2B	Mat2b	Other	10.3435	11.4443	-0.475027	3	1	0.360631	1
ENSG00000038295	ENSMUSG00000053626	TLL1	Tll1	Other	-0.280459	3.56919	-3.22393	0	0	0.000686561	1
ENSG00000038358	ENSMUSG00000036270	EDC4	Edc4	Other	10.525	11.2692	-0.118531	1	0	0.20532	1
ENSG00000038382	ENSMUSG00000022263	TRIO	Trio	Conserved	6.87046	10.1666	-2.6704	1	8	3.00189e-05	0.388084
ENSG00000038427	ENSMUSG00000021614	VCAN	Vcan	Other	2.36673	8.57336	-5.58091	0	0	0.001006	1
ENSG00000038532	ENSMUSG00000068663	CLEC16A	Clec16a	Conserved	9.18482	9.49118	0.319366	9	4	0.0514578	1
ENSG00000038945	ENSMUSG00000025044	MSR1	Msr1	Other	3.17451	-3.14118	6.94142	0	0	1.5971e-05	0.210131
ENSG00000039068	ENSMUSG00000000303	CDH1	Cdh1	Other	5.24328	5.08881	0.7802	0	0	0.230499	1
ENSG00000039123	ENSMUSG00000016018	MTREX	Mtrex	Other	10.2152	10.9877	-0.146776	0	0	0.241088	1
ENSG00000039139	ENSMUSG00000022262	DNAH5	Dnah5	Other	0.56468	-0.970484	2.16089	0	1	0.662188	1
ENSG00000039523	ENSMUSG00000038604	RIPOR1	Ripor1	Other	7.9165	9.40177	-0.859545	1	0	0.394002	1
ENSG00000039537	ENSMUSG00000022181	C6	C6	Other	-1.55197	1.5036	-2.42985	0	0	0.0112997	1
ENSG00000039560	ENSMUSG00000022246	RAI14	Rai14	Other	2.85095	8.61767	-5.14099	0	1	1.71674e-05	0.225357
ENSG00000039600	ENSMUSG00000040489	SOX30	Sox30	Other	3.39532	-1.46574	5.48678	2	0	0.00373177	1
ENSG00000039650	ENSMUSG00000002963	PNKP	Pnkp	Other	8.75399	10.188	-0.808263	0	0	0.913318	1
ENSG00000039987	ENSMUSG00000052819	BEST2	Best2	Other	2.25261	-1.34036	4.21869	0	1	0.000377438	1
ENSG00000040199	ENSMUSG00000031732	PHLPP2	Phlpp2	Other	8.85806	8.62181	0.861965	0	0	9.4047e-05	1
ENSG00000040275	ENSMUSG00000069910	SPDL1	Spdl1	Other	8.63821	8.52508	0.738846	0	0	0.0148606	1
ENSG00000040341	ENSMUSG00000025920	STAU2	Stau2	Other	8.63698	5.82915	3.43355	0	2	2.67354e-09	3.97689e-05
ENSG00000040487	ENSMUSG00000028744	PQLC2	Pqlc2	Other	6.1255	7.11509	-0.363867	0	0	0.149713	1
ENSG00000040531	ENSMUSG00000005949	CTNS	Ctns	Other	7.79419	8.25395	0.165961	0	0	0.454033	1
ENSG00000040608	ENSMUSG00000043811	RTN4R	Rtn4r	Other	2.87545	-1.97269	5.47386	1	0	2.59643e-06	0.0356801
ENSG00000040633	ENSMUSG00000018572	PHF23	Phf23	Other	8.43934	10.4377	-1.37266	0	0	0.000709636	1
ENSG00000040731	ENSMUSG00000022321	CDH10	Cdh10	Other	-0.381156	3.21391	-2.96934	0	0	0.00424113	1
ENSG00000040933	ENSMUSG00000026113	INPP4A	Inpp4a	Conserved	10.9128	10.7378	0.80073	10	3	0.00140498	1
ENSG00000041353	ENSMUSG00000024511	RAB27B	Rab27b	Other	5.1489	5.52803	0.2466	5	0	0.861978	1
ENSG00000041357	ENSMUSG00000032301	PSMA4	Psma4	Other	10.3782	11.6135	-0.609607	0	0	0.998245	1
ENSG00000041515	ENSMUSG00000039057	MYO16	Myo16	Other	3.58929	1.10742	3.10759	0	4	0.190352	1
ENSG00000041802	ENSMUSG00000022538	LSG1	Lsg1	Conserved	10.0055	10.4183	0.212981	1	1	0.00622236	1
ENSG00000041880	ENSMUSG00000023249	PARP3	Parp3	Other	6.7114	10.4737	-3.13657	0	0	1.23243e-10	1.86306e-06
ENSG00000041982	ENSMUSG00000028364	TNC	Tnc	Other	4.11431	4.07998	0.660053	0	2	0.613691	1
ENSG00000041988	ENSMUSG00000039759	THAP3	Thap3	Other	6.79091	9.64809	-2.23146	1	0	4.77863e-05	0.60851
ENSG00000042062	ENSMUSG00000074577	RIPOR3	Ripor3	Other	5.1585	6.59575	-0.811533	0	0	0.275571	1
ENSG00000042088	ENSMUSG00000021177	TDP1	Tdp1	Other	9.59419	7.78383	2.43608	2	0	3.47888e-10	5.23327e-06
ENSG00000042286	ENSMUSG00000020085	AIFM2	Aifm2	Other	6.21607	6.37338	0.468413	0	0	0.142679	1
ENSG00000042317	ENSMUSG00000021007	SPATA7	Spata7	Other	4.77413	5.45671	-0.0568605	0	0	0.0658601	1
ENSG00000042445	ENSMUSG00000056666	RETSAT	Retsat	Other	8.43325	7.80839	1.25058	0	1	0.000632575	1
ENSG00000042493	ENSMUSG00000056737	CAPG	Capg	Conserved	8.38308	11.0869	-2.07807	2	2	0.0284707	1
ENSG00000042753	ENSMUSG00000008036	AP2S1	Ap2s1	Conserved	8.44371	10.742	-1.67252	3	1	0.0190005	1
ENSG00000042781	ENSMUSG00000026609	USH2A	Ush2a	Other	1.70853	-Inf	Inf	0	0	0.00698926	1
ENSG00000042813	ENSMUSG00000020193	ZPBP	Zpbp	Other	-1.60702	6.31024	-7.29154	0	0	7.6488e-06	0.1027
ENSG00000042832	ENSMUSG00000053469	TG	Tg	Other	5.04915	8.81731	-3.14244	0	5	0.0902293	1
ENSG00000042980	ENSMUSG00000014725	ADAM28	Adam28	Other	4.0296	2.59879	2.05653	0	0	0.0320305	1
ENSG00000043039	ENSMUSG00000032033	BARX2	Barx2	Other	2.72473	-3.401	6.75146	0	0	4.15258e-07	0.00588005
ENSG00000043143	ENSMUSG00000020387	JADE2	Jade2	Conserved	10.1975	10.6898	0.133375	3	3	0.118592	1
ENSG00000043355	ENSMUSG00000061524	ZIC2	Zic2	Other	0.291304	-2.95188	3.86891	0	0	0.32034	1
ENSG00000043462	ENSMUSG00000002699	LCP2	Lcp2	Conserved	11.0734	14.1291	-2.42991	9	5	0.000326468	1
ENSG00000043514	ENSMUSG00000028653	TRIT1	Trit1	Other	7.88427	8.43761	0.0723866	0	0	0.159204	1
ENSG00000043591	ENSMUSG00000035283	ADRB1	Adrb1	Other	2.08553	-2.93358	5.64483	0	0	0.0110008	1
ENSG00000044012	ENSMUSG00000032978	GUCA2B	Guca2b	Other	-3.56337	-Inf	Inf	0	0	0.110813	1
ENSG00000044090	ENSMUSG00000038545	CUL7	Cul7	Other	7.93108	7.74395	0.812853	0	0	0.00107704	1
ENSG00000044115	ENSMUSG00000037815	CTNNA1	Ctnna1	Other	9.5951	10.8788	-0.657988	2	1	0.445551	1
ENSG00000044446	ENSMUSG00000031295	PHKA2	Phka2	Other	8.73872	8.96689	0.397549	2	1	0.0722232	1
ENSG00000044459	ENSMUSG00000038070	CNTLN	Cntln	Other	4.90762	7.20621	-1.67287	0	0	0.00119745	1
ENSG00000044524	ENSMUSG00000052504	EPHA3	Epha3	Other	1.84546	2.86427	-0.393089	0	0	0.039324	1
ENSG00000044574	ENSMUSG00000026864	HSPA5	Hspa5	Other	12.4249	14.0125	-0.961882	0	0	0.213964	1
ENSG00000046604	ENSMUSG00000044393	DSG2	Dsg2	Other	3.66929	5.92489	-1.62988	0	0	0.000319711	1
ENSG00000046647	ENSMUSG00000040621	GEMIN8	Gemin8	Other	6.77643	9.10161	-1.69946	1	1	0.00613308	1
ENSG00000046651	ENSMUSG00000040586	OFD1	Ofd1	Other	9.5992	9.40275	0.822171	0	0	2.64992e-05	0.344065
ENSG00000046653	ENSMUSG00000031342	GPM6B	Gpm6b	Mm-Specific	5.93866	9.28052	-2.71614	0	3	9.69099e-05	1
ENSG00000046889	ENSMUSG00000048960	PREX2	Prex2	Other	2.42159	10.7617	-7.7144	0	0	0.000159546	1
ENSG00000047056	ENSMUSG00000021147	WDR37	Wdr37	Other	9.47118	11.0435	-0.946585	2	1	0.105224	1
ENSG00000047188	ENSMUSG00000034653	YTHDC2	Ythdc2	Other	10.1025	9.79498	0.933254	1	0	0.000841144	1
ENSG00000047230	ENSMUSG00000031360	CTPS2	Ctps2	Other	6.32733	11.1514	-4.19833	0	1	2.56535e-11	3.90215e-07
ENSG00000047249	ENSMUSG00000033793	ATP6V1H	Atp6v1h	Other	8.3511	9.59354	-0.616719	2	0	0.240621	1
ENSG00000047315	ENSMUSG00000029250	POLR2B	Polr2b	Other	11.3781	11.0599	0.943891	2	0	1.27529e-07	0.00183591
ENSG00000047346	ENSMUSG00000034858	FAM214A	Fam214a	Other	9.9847	10.0826	0.527873	2	0	0.321537	1
ENSG00000047365	ENSMUSG00000037999	ARAP2	Arap2	Conserved	11.0843	14.204	-2.49403	5	6	0.00442008	1
ENSG00000047410	ENSMUSG00000006005	TPR	Tpr	Other	12.4949	13.7804	-0.659758	0	2	0.613959	1
ENSG00000047457	ENSMUSG00000003617	CP	Cp	Other	3.28043	3.97378	-0.0676314	0	0	0.0999996	1
ENSG00000047578	ENSMUSG00000032743	KIAA0556	D430042O09Rik	Other	8.11133	9.75595	-1.01889	0	0	0.0417698	1
ENSG00000047579	ENSMUSG00000057531	DTNBP1	Dtnbp1	Other	7.47792	8.42517	-0.321529	2	0	0.897161	1
ENSG00000047597	ENSMUSG00000015342	XK	Xk	Other	0.522477	6.36169	-5.21349	0	0	3.46996e-10	5.22055e-06
ENSG00000047617	ENSMUSG00000038115	ANO2	Ano2	Other	0.0860486	-Inf	Inf	0	1	0.362167	1
ENSG00000047621	ENSMUSG00000030347	C12orf4	D6Wsu163e	Other	8.5389	9.31576	-0.15114	1	1	0.544759	1
ENSG00000047648	ENSMUSG00000031355	ARHGAP6	Arhgap6	Other	0.843679	4.16752	-2.69812	0	0	0.000368522	1
ENSG00000047662	ENSMUSG00000015879	FAM184B	Fam184b	Other	3.97937	4.86602	-0.260922	0	0	0.180353	1
ENSG00000047936	ENSMUSG00000019893	ROS1	Ros1	Other	-1.56293	-Inf	Inf	0	0	0.29148	1
ENSG00000048028	ENSMUSG00000032267	USP28	Usp28	Other	8.6556	9.89876	-0.617439	1	0	0.688226	1
ENSG00000048052	ENSMUSG00000004698	HDAC9	Hdac9	Other	4.34899	4.63595	0.338766	0	3	0.831814	1
ENSG00000048140	ENSMUSG00000025875	TSPAN17	Tspan17	Other	9.0839	4.89003	4.81959	3	0	6.91216e-09	0.000102272
ENSG00000048342	ENSMUSG00000039765	CC2D2A	Cc2d2a	Other	4.58885	0.176725	5.03785	0	0	1.30779e-06	0.0182123
ENSG00000048392	ENSMUSG00000022292	RRM2B	Rrm2b	Other	8.93976	9.7772	-0.211722	2	0	0.381391	1
ENSG00000048405	ENSMUSG00000039841	ZNF800	Zfp800	Alternative	10.0531	10.4048	0.274011	4	1	0.0330768	1
ENSG00000048462	ENSMUSG00000022496	TNFRSF17	Tnfrsf17	Mm-Specific	-0.496864	-Inf	Inf	0	2	0.0255115	1
ENSG00000048471	ENSMUSG00000071669	SNX29	Snx29	Alternative	8.94837	7.21581	2.35828	3	8	0.000138991	1
ENSG00000048540	ENSMUSG00000030226	LMO3	Lmo3	Other	1.67614	-0.570022	2.87188	0	0	0.57693	1
ENSG00000048544	ENSMUSG00000034729	MRPS10	Mrps10	Other	8.6707	9.1445	0.151917	1	3	0.0433333	1
ENSG00000048649	ENSMUSG00000035623	RSF1	Rsf1	Other	10.0048	11.2352	-0.604665	1	0	0.950526	1
ENSG00000048707	ENSMUSG00000020220	VPS13D	Vps13d	Conserved	10.7505	11.7226	-0.346439	8	3	0.612305	1
ENSG00000048740	ENSMUSG00000002107	CELF2	Celf2	Conserved	11.8572	13.6552	-1.17231	11	5	0.0848239	1
ENSG00000048828	ENSMUSG00000038014	FAM120A	Fam120a	Other	11.0908	13.7408	-2.02433	2	4	2.76519e-06	0.0379302
ENSG00000048991	ENSMUSG00000056211	R3HDM1	R3hdm1	Other	8.97389	11.6298	-2.03017	0	0	0.000186569	1
ENSG00000049089	ENSMUSG00000028626	COL9A2	Col9a2	Other	5.93139	-0.784557	7.34167	1	0	4.7005e-13	7.21527e-09
ENSG00000049130	ENSMUSG00000019966	KITLG	Kitl	Other	3.10524	3.96598	-0.235012	0	0	0.938047	1
ENSG00000049167	ENSMUSG00000021694	ERCC8	Ercc8	Other	6.62753	8.0452	-0.791948	0	0	0.00136066	1
ENSG00000049192	ENSMUSG00000046169	ADAMTS6	Adamts6	Other	5.47981	10.1507	-4.04518	0	0	5.72959e-06	0.0773953
ENSG00000049239	ENSMUSG00000028980	H6PD	H6pd	Other	9.07976	9.48012	0.225367	2	0	0.0453315	1
ENSG00000049245	ENSMUSG00000028955	VAMP3	Vamp3	Other	8.98816	10.73	-1.11608	0	0	0.00160986	1
ENSG00000049246	ENSMUSG00000028957	PER3	Per3	Other	6.46727	7.51587	-0.422883	0	1	0.233491	1
ENSG00000049247	ENSMUSG00000028963	UTS2	Uts2	Other	0.732175	-Inf	Inf	0	0	0.0108701	1
ENSG00000049249	ENSMUSG00000028965	TNFRSF9	Tnfrsf9	Other	10.2186	11.8367	-0.992406	0	0	0.541828	1
ENSG00000049283	ENSMUSG00000010080	EPN3	Epn3	Other	1.87398	-0.0118651	2.51157	0	0	0.386303	1
ENSG00000049323	ENSMUSG00000001870	LTBP1	Ltbp1	Other	2.64656	6.44002	-3.16773	2	0	9.01388e-07	0.0126312
ENSG00000049540	ENSMUSG00000029675	ELN	Eln	Other	3.64806	2.09894	2.17484	0	0	0.0168731	1
ENSG00000049541	ENSMUSG00000023104	RFC2	Rfc2	Other	8.27553	10.3958	-1.49456	1	0	0.0278715	1
ENSG00000049618	ENSMUSG00000069729	ARID1B	Arid1b	Alternative	10.3189	11.7746	-0.829972	10	5	0.464649	1
ENSG00000049656	ENSMUSG00000021610	CLPTM1L	Clptm1l	Other	10.6432	11.4145	-0.145593	3	1	0.0898243	1
ENSG00000049759	ENSMUSG00000024589	NEDD4L	Nedd4l	Other	7.64587	9.04421	-0.77262	0	2	0.306951	1
ENSG00000049768	ENSMUSG00000039521	FOXP3	Foxp3	Other	7.06929	7.66452	0.0304972	0	0	0.991824	1
ENSG00000049769	ENSMUSG00000039556	PPP1R3F	Ppp1r3f	Other	6.71948	7.42376	-0.078562	1	1	0.893672	1
ENSG00000049860	ENSMUSG00000021665	HEXB	Hexb	Other	9.00099	10.9081	-1.28141	1	0	0.000110019	1
ENSG00000049883	ENSMUSG00000021650	PTCD2	Ptcd2	Other	7.37571	9.33373	-1.33229	0	0	3.2926e-05	0.424417
ENSG00000050030	ENSMUSG00000046449	NEXMIF	Nexmif	Other	3.92233	-1.1134	5.66146	0	1	4.41641e-08	0.000643339
ENSG00000050165	ENSMUSG00000030772	DKK3	Dkk3	Other	4.37156	-2.33447	7.33174	0	0	0.00511646	1
ENSG00000050327	ENSMUSG00000033542	ARHGEF5	Arhgef5	Other	6.80997	5.53435	1.90134	0	0	0.000510912	1
ENSG00000050344	ENSMUSG00000029832	NFE2L3	Nfe2l3	Other	10.3335	4.97534	5.98393	4	2	1.52201e-09	2.27236e-05
ENSG00000050393	ENSMUSG00000021371	MCUR1	Mcur1	Other	8.45487	9.91381	-0.833226	3	0	0.0306163	1
ENSG00000050405	ENSMUSG00000023022	LIMA1	Lima1	Other	7.81738	5.41556	3.02754	1	0	1.77558e-05	0.232796
ENSG00000050426	ENSMUSG00000037353	LETMD1	Letmd1	Other	9.22287	9.68839	0.160205	0	0	0.0179541	1
ENSG00000050438	ENSMUSG00000023032	SLC4A8	Slc4a8	Alternative	6.46943	7.75813	-0.662979	2	3	0.0573725	1
ENSG00000050555	ENSMUSG00000026840	LAMC3	Lamc3	Other	2.56855	-0.017846	3.21212	0	0	0.0626954	1
ENSG00000050628	ENSMUSG00000040016	PTGER3	Ptger3	Other	5.15912	7.01622	-1.23137	0	1	0.0234026	1
ENSG00000050730	ENSMUSG00000044162	TNIP3	Tnip3	Conserved	9.27966	7.66766	2.23772	2	9	0.713168	1
ENSG00000050748	ENSMUSG00000020366	MAPK9	Mapk9	Other	9.06185	10.955	-1.26746	0	0	0.0047778	1
ENSG00000050767	ENSMUSG00000063564	COL23A1	Col23a1	Alternative	1.93451	5.65251	-3.09228	2	1	1.13149e-08	0.000166781
ENSG00000050820	ENSMUSG00000031955	BCAR1	Bcar1	Other	3.23894	3.51909	0.345574	1	0	0.0279603	1
ENSG00000051009	ENSMUSG00000044465	FAM160A2	Fam160a2	Other	8.57049	10.7767	-1.58048	0	2	0.00234403	1
ENSG00000051108	ENSMUSG00000031770	HERPUD1	Herpud1	Conserved	9.98875	10.175	0.439436	4	2	0.000168816	1
ENSG00000051128	ENSMUSG00000003573	HOMER3	Homer3	Other	2.82654	6.76477	-3.31251	0	0	1.46429e-06	0.0203477
ENSG00000051341	ENSMUSG00000034206	POLQ	Polq	Conserved	8.96732	8.57935	1.0137	1	1	0.425537	1
ENSG00000051382	ENSMUSG00000032462	PIK3CB	Pik3cb	Other	8.35558	8.17038	0.810923	4	0	0.00460422	1
ENSG00000051523	ENSMUSG00000006519	CYBA	Cyba	Other	10.3537	12.0192	-1.03981	0	1	0.577683	1
ENSG00000051596	ENSMUSG00000025872	THOC3	Thoc3	Other	8.23114	9.2276	-0.370743	0	0	0.84124	1
ENSG00000051620	ENSMUSG00000019853	HEBP2	Hebp2	Other	9.33186	-0.0750382	10.0326	1	0	8.69832e-22	1.34528e-17
ENSG00000051825	ENSMUSG00000038126	MPHOSPH9	Mphosph9	Other	10.1691	9.65144	1.14341	0	0	0.000317928	1
ENSG00000052126	ENSMUSG00000030231	PLEKHA5	Plekha5	Other	7.09565	10.5669	-2.84548	0	4	2.20134e-07	0.00314857
ENSG00000052344	ENSMUSG00000030800	PRSS8	Prss8	Other	3.19116	1.41606	2.40081	0	0	0.194383	1
ENSG00000052723	ENSMUSG00000027854	SIKE1	Sike1	Conserved	9.56759	11.446	-1.25269	1	1	0.0144643	1
ENSG00000052749	ENSMUSG00000035049	RRP12	Rrp12	Other	9.26884	9.84423	0.0503313	1	1	0.213907	1
ENSG00000052795	ENSMUSG00000061175	FNIP2	Fnip2	Alternative	9.12385	6.55491	3.19467	1	1	7.67988e-08	0.00111189
ENSG00000052802	ENSMUSG00000031604	MSMO1	Msmo1	Conserved	9.81288	10.5282	-0.0896322	1	2	0.379276	1
ENSG00000052841	ENSMUSG00000027194	TTC17	Ttc17	Other	10.1247	10.3243	0.426077	1	2	0.00596613	1
ENSG00000052850	ENSMUSG00000040310	ALX4	Alx4	Other	1.85349	2.24889	0.230325	1	0	0.410195	1
ENSG00000053108	ENSMUSG00000036264	FSTL4	Fstl4	Other	1.47399	1.16152	0.938192	0	1	0.337882	1
ENSG00000053254	ENSMUSG00000033713	FOXN3	Foxn3	Conserved	10.201	11.8641	-1.03736	10	4	0.391427	1
ENSG00000053328	ENSMUSG00000045555	METTL24	Mettl24	Other	0.50062	-2.48365	3.60999	0	1	0.34819	1
ENSG00000053372	ENSMUSG00000028741	MRTO4	Mrto4	Other	9.25379	9.78352	0.0959939	0	1	0.426282	1
ENSG00000053501	ENSMUSG00000002395	USE1	Use1	Other	7.25619	11.401	-3.51906	0	0	1.46583e-07	0.00210625
ENSG00000053747	ENSMUSG00000024421	LAMA3	Lama3	Alternative	2.06503	0.636495	2.05425	6	1	0.517201	1
ENSG00000053770	ENSMUSG00000036291	AP5M1	Ap5m1	Conserved	9.72428	10.9986	-0.648617	1	1	0.632674	1
ENSG00000053900	ENSMUSG00000029176	ANAPC4	Anapc4	Other	9.39976	10.3972	-0.371672	1	2	0.569396	1
ENSG00000053918	ENSMUSG00000009545	KCNQ1	Kcnq1	Other	6.00275	-3.401	10.0295	3	1	3.35964e-10	5.05626e-06
ENSG00000054116	ENSMUSG00000028847	TRAPPC3	Trappc3	Conserved	9.18818	9.52012	0.293781	2	2	0.00648758	1
ENSG00000054118	ENSMUSG00000043962	THRAP3	Thrap3	Other	11.1983	12.8865	-1.06249	1	2	0.697717	1
ENSG00000054148	ENSMUSG00000036504	PHPT1	Phpt1	Other	8.85232	8.48295	0.995099	0	0	0.267503	1
ENSG00000054179	ENSMUSG00000015085	ENTPD2	Entpd2	Other	1.56764	1.71361	0.479756	0	0	0.652351	1
ENSG00000054267	ENSMUSG00000039219	ARID4B	Arid4b	Other	11.0072	12.0879	-0.454966	2	0	0.467243	1
ENSG00000054277	ENSMUSG00000026525	OPN3	Opn3	Other	6.68414	2.52334	4.78653	2	0	3.61832e-07	0.00513368
ENSG00000054282	ENSMUSG00000026504	SDCCAG8	Sdccag8	Other	7.19282	9.97664	-2.1581	2	0	0.0148388	1
ENSG00000054356	ENSMUSG00000026204	PTPRN	Ptprn	Other	2.13628	4.37534	-1.61333	1	0	0.00686077	1
ENSG00000054392	ENSMUSG00000037375	HHAT	Hhat	Other	4.30871	7.23856	-2.30412	0	1	2.58911e-06	0.0355873
ENSG00000054523	ENSMUSG00000063077	KIF1B	Kif1b	Conserved	10.0418	11.9262	-1.25863	2	1	0.251622	1
ENSG00000054598	ENSMUSG00000050295	FOXC1	Foxc1	Other	0.577879	1.54736	-0.343758	2	0	0.145224	1
ENSG00000054611	ENSMUSG00000051864	TBC1D22A	Tbc1d22a	Other	8.46771	9.64237	-0.548936	2	1	0.722739	1
ENSG00000054654	ENSMUSG00000063450	SYNE2	Syne2	Conserved	13.2034	10.1702	3.65893	9	5	3.35912e-12	5.1371e-08
ENSG00000054690	ENSMUSG00000060716	PLEKHH1	Plekhh1	Other	3.82449	4.99525	-0.545037	0	0	0.0781295	1
ENSG00000054793	ENSMUSG00000027546	ATP9A	Atp9a	Alternative	6.88265	7.4103	0.0980711	1	1	0.925611	1
ENSG00000054796	ENSMUSG00000005883	SPO11	Spo11	Other	-4.13458	9.33159	-12.8404	0	0	2.0831e-06	0.028751
ENSG00000054803	ENSMUSG00000067578	CBLN4	Cbln4	Other	-0.254693	-Inf	Inf	0	0	0.670214	1
ENSG00000054938	ENSMUSG00000030732	CHRDL2	Chrdl2	Other	-0.255359	-Inf	Inf	0	0	0.0343944	1
ENSG00000054965	ENSMUSG00000029461	FAM168A	Fam168a	Other	8.93551	11.2555	-1.69428	2	1	0.0436513	1
ENSG00000054967	ENSMUSG00000008318	RELT	Relt	Conserved	8.86343	8.65171	0.837444	4	1	0.0349325	1
ENSG00000054983	ENSMUSG00000021003	GALC	Galc	Other	8.12111	6.94862	1.79822	2	1	1.7891e-05	0.234515
ENSG00000055044	ENSMUSG00000026020	NOP58	Nop58	Other	11.0842	11.8616	-0.151683	0	0	0.107786	1
ENSG00000055070	ENSMUSG00000040842	SZRD1	Szrd1	Other	10.3241	10.9471	0.0027073	0	0	0.0457341	1
ENSG00000055118	ENSMUSG00000038319	KCNH2	Kcnh2	Other	2.85894	7.11713	-3.63247	2	2	0.00357126	1
ENSG00000055130	ENSMUSG00000029686	CUL1	Cul1	Other	10.2066	11.7308	-0.898408	2	0	0.500527	1
ENSG00000055147	ENSMUSG00000020523	FAM114A2	Fam114a2	Other	7.98507	10.8217	-2.21091	0	0	2.54353e-08	0.000372246
ENSG00000055163	ENSMUSG00000020340	CYFIP2	Cyfip2	Alternative	11.7025	13.4975	-1.16935	4	2	0.0702432	1
ENSG00000055208	ENSMUSG00000015755	TAB2	Tab2	Other	11.5477	13.1319	-0.958521	3	1	0.417927	1
ENSG00000055211	ENSMUSG00000040006	GINM1	Ginm1	Other	8.02288	9.86585	-1.21725	1	0	0.0195397	1
ENSG00000055332	ENSMUSG00000024079	EIF2AK2	Eif2ak2	Other	10.7012	9.77119	1.55572	0	0	0.000197078	1
ENSG00000055483	ENSMUSG00000033909	USP36	Usp36	Conserved	10.8748	11.0953	0.405174	4	1	0.100156	1
ENSG00000055609	ENSMUSG00000038056	KMT2C	Kmt2c	Other	11.7618	12.9467	-0.559135	3	1	0.979517	1
ENSG00000055732	ENSMUSG00000036853	MCOLN3	Mcoln3	Other	6.75684	5.57398	1.80858	1	0	0.0269608	1
ENSG00000055813	ENSMUSG00000032878	CCDC85A	Ccdc85a	Other	-3.56328	-0.0739132	-2.86364	0	0	0.00522152	1
ENSG00000055917	ENSMUSG00000020594	PUM2	Pum2	Other	11.1246	13.134	-1.38364	1	1	0.0282096	1
ENSG00000055950	ENSMUSG00000025208	MRPL43	Mrpl43	Other	8.05877	10.1261	-1.4416	0	0	0.0202946	1
ENSG00000055955	ENSMUSG00000021922	ITIH4	Itih4	Other	7.24949	-1.8318	9.70702	0	0	7.97742e-08	0.00115449
ENSG00000055957	ENSMUSG00000006529	ITIH1	Itih1	Other	1.34379	-3.59323	5.56274	0	0	0.00657765	1
ENSG00000056050	ENSMUSG00000038005	HPF1	Hpf1	Other	7.19895	10.5417	-2.71706	1	0	5.1906e-05	0.659103
ENSG00000056097	ENSMUSG00000022201	ZFR	Zfr	Other	10.7449	11.8473	-0.476726	1	0	0.34728	1
ENSG00000056277	ENSMUSG00000036916	ZNF280C	Zfp280c	Other	7.02074	10.2736	-2.6271	1	0	5.16529e-05	0.656044
ENSG00000056291	ENSMUSG00000035528	NPFFR2	Npffr2	Other	-0.605546	-Inf	Inf	0	1	0.28572	1
ENSG00000056487	ENSMUSG00000016624	PHF21B	Phf21b	Other	1.54896	5.39571	-3.22103	0	1	1.25759e-07	0.00181131
ENSG00000056558	ENSMUSG00000026875	TRAF1	Traf1	Conserved	11.412	13.3427	-1.30498	7	7	0.0577793	1
ENSG00000056586	ENSMUSG00000075376	RC3H2	Rc3h2	Other	10.4751	11.3213	-0.220515	2	0	0.223858	1
ENSG00000056736	ENSMUSG00000015966	IL17RB	Il17rb	Other	5.03535	3.88913	1.77194	0	0	0.00645022	1
ENSG00000056972	ENSMUSG00000019842	TRAF3IP2	Traf3ip2	Other	7.63214	10.6168	-2.35893	0	1	3.16468e-07	0.00449922
ENSG00000057019	ENSMUSG00000035107	DCBLD2	Dcbld2	Other	6.28488	7.8583	-0.947702	0	0	0.300749	1
ENSG00000057252	ENSMUSG00000026600	SOAT1	Soat1	Other	10.2037	10.9566	-0.127186	1	2	0.108633	1
ENSG00000057294	ENSMUSG00000041957	PKP2	Pkp2	Other	2.46791	5.85494	-2.76131	0	0	0.0158701	1
ENSG00000057468	ENSMUSG00000005493	MSH4	Msh4	Other	2.01895	4.99897	-2.3543	0	0	7.77428e-06	0.104362
ENSG00000057593	ENSMUSG00000031443	F7	F7	Other	-0.0441724	0.467543	0.114007	0	0	0.574228	1
ENSG00000057608	ENSMUSG00000021218	GDI2	Gdi2	Other	11.5429	13.5666	-1.39794	1	1	0.0188685	1
ENSG00000057657	ENSMUSG00000038151	PRDM1	Prdm1	Conserved	10.3129	9.73438	1.20427	3	12	7.21954e-05	0.905907
ENSG00000057663	ENSMUSG00000038160	ATG5	Atg5	Conserved	9.18348	9.96722	-0.158023	13	1	0.298952	1
ENSG00000057704	ENSMUSG00000020023	TMCC3	Tmcc3	Alternative	5.07854	7.37694	-1.67268	2	4	0.0165553	1
ENSG00000057757	ENSMUSG00000028669	PITHD1	Pithd1	Other	9.12284	9.57759	0.170971	0	1	0.0285997	1
ENSG00000057935	ENSMUSG00000055817	MTA3	Mta3	Other	7.80347	10.8967	-2.46749	0	4	7.29306e-11	1.10468e-06
ENSG00000058056	ENSMUSG00000056900	USP13	Usp13	Other	7.31834	-2.18967	10.1337	0	0	2.24958e-20	3.47898e-16
ENSG00000058063	ENSMUSG00000037400	ATP11B	Atp11b	Other	11.7937	12.8916	-0.472192	1	5	0.515285	1
ENSG00000058085	ENSMUSG00000026479	LAMC2	Lamc2	Other	3.09944	7.64133	-3.91617	1	1	0.0161888	1
ENSG00000058091	ENSMUSG00000028926	CDK14	Cdk14	Other	3.0458	4.47614	-0.804615	0	0	0.0103595	1
ENSG00000058262	ENSMUSG00000030082	SEC61A1	Sec61a1	Other	11.5847	12.4944	-0.283894	1	0	0.0628198	1
ENSG00000058272	ENSMUSG00000019907	PPP1R12A	Ppp1r12a	Conserved	10.9952	14.4078	-2.78689	2	6	0.000137035	1
ENSG00000058335	ENSMUSG00000032356	RASGRF1	Rasgrf1	Other	3.79378	4.31798	0.101522	0	2	0.163751	1
ENSG00000058404	ENSMUSG00000057897	CAMK2B	Camk2b	Conserved	3.10776	8.71531	-4.98182	1	1	6.57558e-08	0.00095359
ENSG00000058453	ENSMUSG00000040860	CROCC	Crocc	Other	8.35126	7.22636	1.75063	4	0	0.000535946	1
ENSG00000058600	ENSMUSG00000030880	POLR3E	Polr3e	Other	10.2172	9.95072	0.892196	1	0	0.000241937	1
ENSG00000058668	ENSMUSG00000026463	ATP2B4	Atp2b4	Conserved	11.9993	13.5078	-0.882779	9	4	0.697697	1
ENSG00000058729	ENSMUSG00000116564	RIOK2	Riok2	Other	8.74083	9.91767	-0.551121	0	2	0.274994	1
ENSG00000058799	ENSMUSG00000057375	YIPF1	Yipf1	Other	7.30658	10.1112	-2.17889	1	0	0.0002431	1
ENSG00000058804	ENSMUSG00000028614	NDC1	Ndc1	Other	9.51522	8.21277	1.92817	2	0	2.68261e-07	0.00382325
ENSG00000058866	ENSMUSG00000022861	DGKG	Dgkg	Other	3.62705	3.95797	0.294804	0	7	0.908706	1
ENSG00000059122	ENSMUSG00000040097	FLYWCH1	Flywch1	Other	9.35429	9.57033	0.40968	0	1	0.403238	1
ENSG00000059145	ENSMUSG00000015127	UNKL	Unkl	Other	8.24768	10.1076	-1.23421	0	4	0.381909	1
ENSG00000059377	ENSMUSG00000029925	TBXAS1	Tbxas1	Other	6.10379	5.3382	1.39132	2	0	0.0104407	1
ENSG00000059378	ENSMUSG00000038507	PARP12	Parp12	Other	10.2294	7.81672	3.03844	1	0	1.59841e-10	2.41311e-06
ENSG00000059573	ENSMUSG00000025007	ALDH18A1	Aldh18a1	Other	9.6373	10.3815	-0.118439	0	0	0.565376	1
ENSG00000059588	ENSMUSG00000090290	TARBP1	Tarbp1	Other	9.68569	8.61546	1.69595	0	2	3.93264e-06	0.0535625
ENSG00000059691	ENSMUSG00000028085	GATB	Gatb	Other	6.92919	7.2221	0.332809	0	1	0.364396	1
ENSG00000059728	ENSMUSG00000001156	MXD1	Mxd1	Other	9.43986	12.6693	-2.60369	1	1	0.0013571	1
ENSG00000059758	ENSMUSG00000020015	CDK17	Cdk17	Conserved	10.4458	12.8565	-1.78494	8	8	0.0258427	1
ENSG00000059915	ENSMUSG00000037126	PSD	Psd	Other	5.76936	9.76311	-3.36803	0	1	0.0848681	1
ENSG00000060069	ENSMUSG00000033323	CTDP1	Ctdp1	Other	9.2909	9.87225	0.044377	1	0	0.0193239	1
ENSG00000060138	ENSMUSG00000030189	YBX3	Ybx3	Other	8.80909	11.7925	-2.3577	0	2	0.000458344	1
ENSG00000060140	ENSMUSG00000032899	STYK1	Styk1	Other	4.07233	5.948	-1.24994	1	0	0.00626111	1
ENSG00000060237	ENSMUSG00000045962	WNK1	Wnk1	Conserved	11.6425	14.3831	-2.11487	4	3	1.25038e-05	0.165588
ENSG00000060339	ENSMUSG00000020074	CCAR1	Ccar1	Other	11.4731	12.2092	-0.110412	1	0	0.757302	1
ENSG00000060491	ENSMUSG00000049401	OGFR	Ogfr	Other	9.69748	11.2906	-0.967412	0	0	0.792442	1
ENSG00000060558	ENSMUSG00000034792	GNA15	Gna15	Other	9.33257	8.82961	1.12869	3	1	0.0157101	1
ENSG00000060566	ENSMUSG00000035041	CREB3L3	Creb3l3	Other	2.23978	0.745779	2.11972	0	0	0.444004	1
ENSG00000060642	ENSMUSG00000043257	PIGV	Pigv	Conserved	7.85312	9.35344	-0.874597	3	1	0.00426923	1
ENSG00000060656	ENSMUSG00000028909	PTPRU	Ptpru	Other	3.4434	1.94587	2.12324	2	0	0.0665151	1
ENSG00000060688	ENSMUSG00000074088	SNRNP40	Snrnp40	Other	9.58963	10.2469	-0.0315185	0	0	0.0142686	1
ENSG00000060709	ENSMUSG00000029420	RIMBP2	Rimbp2	Other	1.66663	5.95797	-3.66562	0	0	0.000837998	1
ENSG00000060718	ENSMUSG00000027966	COL11A1	Col11a1	Other	-0.418476	-2.29188	2.49913	0	0	0.240884	1
ENSG00000060749	ENSMUSG00000074994	QSER1	Qser1	Other	7.96463	9.67661	-1.08626	1	1	0.137508	1
ENSG00000060762	ENSMUSG00000023861	MPC1	Mpc1	Other	7.37189	10.2511	-2.25351	2	0	0.00586953	1
ENSG00000060982	ENSMUSG00000030268	BCAT1	Bcat1	Alternative	9.69394	8.50977	1.80988	4	12	0.0218771	1
ENSG00000061273	ENSMUSG00000022475	HDAC7	Hdac7	Conserved	10.7979	12.8515	-1.42787	6	6	0.00220843	1
ENSG00000061337	ENSMUSG00000036306	LZTS1	Lzts1	Alternative	5.61437	8.20219	-1.9621	5	2	0.000213546	1
ENSG00000061455	ENSMUSG00000069378	PRDM6	Prdm6	Other	1.50846	-Inf	Inf	0	0	0.00155912	1
ENSG00000061492	ENSMUSG00000012282	WNT8A	Wnt8a	Other	-0.985962	0.818057	-1.1783	0	0	0.0393076	1
ENSG00000061656	ENSMUSG00000038180	SPAG4	Spag4	Other	5.79705	5.45825	0.964517	2	0	0.0390393	1
ENSG00000061676	ENSMUSG00000027002	NCKAP1	Nckap1	Other	7.38012	8.95418	-0.948338	1	0	0.0188109	1
ENSG00000061794	ENSMUSG00000040112	MRPS35	Mrps35	Other	9.19504	9.23097	0.589799	1	0	0.0206115	1
ENSG00000061918	ENSMUSG00000028005	GUCY1B1	Gucy1b1	Other	1.37616	4.0391	-2.03721	0	0	0.00440564	1
ENSG00000061936	ENSMUSG00000029439	SFSWAP	Sfswap	Conserved	9.84957	11.2074	-0.732154	6	1	0.294131	1
ENSG00000061938	ENSMUSG00000022791	TNK2	Tnk2	Other	9.74398	8.84577	1.52394	0	1	0.00223484	1
ENSG00000061987	ENSMUSG00000034602	MON2	Mon2	Other	9.90663	11.4263	-0.893902	3	0	0.0693762	1
ENSG00000062038	ENSMUSG00000061048	CDH3	Cdh3	Other	3.65712	1.39324	2.8896	0	0	0.000210165	1
ENSG00000062194	ENSMUSG00000032745	GPBP1	Gpbp1	Other	10.9212	12.3555	-0.808587	1	0	0.653615	1
ENSG00000062282	ENSMUSG00000030747	DGAT2	Dgat2	Other	5.10623	4.24558	1.48638	3	1	0.0265314	1
ENSG00000062370	ENSMUSG00000087598	ZNF112	Zfp111	Other	0.434805	4.30218	-3.24165	0	0	0.00021582	1
ENSG00000062524	ENSMUSG00000027297	LTK	Ltk	Other	5.55818	4.14901	2.03489	0	0	0.812492	1
ENSG00000062582	ENSMUSG00000020477	MRPS24	Mrps24	Other	8.14474	9.35475	-0.58429	1	0	0.904839	1
ENSG00000062598	ENSMUSG00000017670	ELMO2	Elmo2	Conserved	10.177	10.6955	0.107272	2	5	0.0251474	1
ENSG00000062650	ENSMUSG00000041408	WAPL	Wapl	Other	10.9303	12.5214	-0.965383	2	0	0.0520029	1
ENSG00000062716	ENSMUSG00000018171	VMP1	Vmp1	Conserved	12.4557	12.3751	0.706281	3	7	0.0630731	1
ENSG00000062725	ENSMUSG00000018481	APPBP2	Appbp2	Other	9.33873	10.8261	-0.861652	0	1	0.100041	1
ENSG00000062822	ENSMUSG00000038644	POLD1	Pold1	Other	9.10547	9.26955	0.461646	0	0	0.0268012	1
ENSG00000063015	ENSMUSG00000000632	SEZ6	Sez6	Other	3.28067	2.8552	1.05119	0	1	0.990372	1
ENSG00000063046	ENSMUSG00000058655	EIF4B	Eif4b	Other	13.1561	13.7043	0.0775418	1	0	0.00271931	1
ENSG00000063127	ENSMUSG00000094152	SLC6A16	Slc6a16	Other	4.76689	-2.18685	7.57947	0	0	3.35672e-08	0.000490148
ENSG00000063169	ENSMUSG00000070808	BICRA	Bicra	Other	7.85223	10.8079	-2.32991	1	2	0.00216014	1
ENSG00000063176	ENSMUSG00000057342	SPHK2	Sphk2	Other	7.21662	9.67123	-1.82889	1	0	1.36868e-05	0.180981
ENSG00000063177	ENSMUSG00000059070	RPL18	Rpl18	Other	12.4383	14.6465	-1.58246	0	1	0.0186448	1
ENSG00000063180	ENSMUSG00000003273	CA11	Car11	Other	6.18027	4.85826	1.94774	0	0	0.0024191	1
ENSG00000063244	ENSMUSG00000030435	U2AF2	U2af2	Other	11.1994	12.3877	-0.562555	1	0	0.229255	1
ENSG00000063245	ENSMUSG00000035203	EPN1	Epn1	Conserved	8.82989	11.1763	-1.72071	1	1	0.0461048	1
ENSG00000063322	ENSMUSG00000003444	MED29	Med29	Conserved	8.78929	8.04422	1.37079	4	2	0.000254476	1
ENSG00000063438	ENSMUSG00000021575	AHRR	Ahrr	Other	7.53779	6.46188	1.70163	4	0	0.138625	1
ENSG00000063515	ENSMUSG00000022738	GSC2	Gsc2	Other	-1.15789	-Inf	Inf	0	0	0.794454	1
ENSG00000063601	ENSMUSG00000015214	MTMR1	Mtmr1	Other	10.0876	10.6148	0.0984532	1	0	0.00644143	1
ENSG00000063660	ENSMUSG00000034220	GPC1	Gpc1	Other	4.64019	9.03268	-3.76676	1	2	0.00167457	1
ENSG00000063761	ENSMUSG00000021044	ADCK1	Adck1	Other	5.30467	7.84216	-1.91176	0	0	5.77853e-06	0.0780333
ENSG00000063854	ENSMUSG00000024158	HAGH	Hagh	Other	8.16791	7.48261	1.31103	0	0	6.42899e-05	0.809924
ENSG00000063978	ENSMUSG00000029110	RNF4	Rnf4	Other	10.6648	12.1365	-0.84598	2	0	0.664493	1
ENSG00000064012	ENSMUSG00000026029	CASP8	Casp8	Other	11.1749	12.0863	-0.285651	1	1	0.283121	1
ENSG00000064042	ENSMUSG00000037736	LIMCH1	Limch1	Other	1.3131	1.45715	0.481666	0	0	0.27167	1
ENSG00000064102	ENSMUSG00000040250	INTS13	Ints13	Other	9.55283	10.5891	-0.410519	2	0	0.437684	1
ENSG00000064115	ENSMUSG00000040234	TM7SF3	Tm7sf3	Other	8.26748	8.98579	-0.0925856	1	1	0.339655	1
ENSG00000064195	ENSMUSG00000001510	DLX3	Dlx3	Other	-0.171193	-2.49392	2.94845	0	0	0.571481	1
ENSG00000064199	ENSMUSG00000001948	SPA17	Spa17	Other	4.5236	1.69979	3.44954	1	0	0.0201276	1
ENSG00000064201	ENSMUSG00000000244	TSPAN32	Tspan32	Conserved	6.18721	11.3012	-4.48824	2	3	2.18168e-07	0.00312089
ENSG00000064205	ENSMUSG00000027656	WISP2	Wisp2	Other	3.52206	-Inf	Inf	0	2	2.51888e-09	3.74886e-05
ENSG00000064218	ENSMUSG00000042372	DMRT3	Dmrt3	Other	-0.740609	-Inf	Inf	2	0	0.888125	1
ENSG00000064225	ENSMUSG00000022747	ST3GAL6	St3gal6	Mm-Specific	2.93209	10.0357	-6.47792	0	4	7.52694e-13	1.15426e-08
ENSG00000064270	ENSMUSG00000034112	ATP2C2	Atp2c2	Other	3.35006	1.07739	2.89839	0	0	0.024465	1
ENSG00000064300	ENSMUSG00000000120	NGFR	Ngfr	Other	0.610329	2.44055	-1.2045	0	0	0.0435735	1
ENSG00000064309	ENSMUSG00000038119	CDON	Cdon	Other	4.78283	9.79655	-4.388	0	0	2.65788e-12	4.06656e-08
ENSG00000064313	ENSMUSG00000037343	TAF2	Taf2	Other	9.88758	10.687	-0.173681	0	0	0.037657	1
ENSG00000064393	ENSMUSG00000061436	HIPK2	Hipk2	Conserved	10.1029	10.2496	0.479073	3	4	0.0190982	1
ENSG00000064419	ENSMUSG00000012535	TNPO3	Tnpo3	Other	10.0555	11.1814	-0.500209	2	0	0.723341	1
ENSG00000064490	ENSMUSG00000036120	RFXANK	Rfxank	Other	8.09052	9.42052	-0.704269	0	0	0.792996	1
ENSG00000064545	ENSMUSG00000002342	TMEM161A	Tmem161a	Other	6.88826	9.10997	-1.59599	0	0	4.95946e-06	0.0672106
ENSG00000064547	ENSMUSG00000031861	LPAR2	Lpar2	Other	8.56608	7.81913	1.37267	0	0	0.0188407	1
ENSG00000064601	ENSMUSG00000017760	CTSA	Ctsa	Other	8.78742	11.8783	-2.46516	0	0	0.000105514	1
ENSG00000064607	ENSMUSG00000036054	SUGP2	Sugp2	Other	10.8143	10.0711	1.36896	0	0	2.69129e-07	0.00383536
ENSG00000064651	ENSMUSG00000024597	SLC12A2	Slc12a2	Other	8.89459	8.91862	0.601689	3	0	0.00521219	1
ENSG00000064652	ENSMUSG00000024535	SNX24	Snx24	Other	4.79606	-1.82772	7.2495	1	0	3.29975e-10	4.96711e-06
ENSG00000064655	ENSMUSG00000017897	EYA2	Eya2	Other	0.663513	8.18656	-6.89732	1	3	2.00976e-05	0.262755
ENSG00000064666	ENSMUSG00000004665	CNN2	Cnn2	Other	11.1714	13.3263	-1.52922	2	0	0.0179815	1
ENSG00000064687	ENSMUSG00000035722	ABCA7	Abca7	Other	9.4138	11.8568	-1.81729	2	0	0.00319839	1
ENSG00000064692	ENSMUSG00000024534	SNCAIP	Sncaip	Other	1.22302	-Inf	Inf	0	0	8.07641e-05	1
ENSG00000064703	ENSMUSG00000027905	DDX20	Ddx20	Conserved	9.03144	9.44498	0.212182	2	1	0.00799996	1
ENSG00000064726	ENSMUSG00000025103	BTBD1	Btbd1	Other	10.2881	10.6853	0.228539	1	0	0.00438562	1
ENSG00000064763	ENSMUSG00000030303	FAR2	Far2	Hs-Specific	7.40453	7.52964	0.500616	2	0	0.19909	1
ENSG00000064787	ENSMUSG00000013523	BCAS1	Bcas1	Conserved	2.32568	4.92169	-1.97029	9	5	2.56425e-06	0.0352661
ENSG00000064835	ENSMUSG00000004842	POU1F1	Pou1f1	Other	0.161555	2.47976	-1.69248	0	0	0.00927634	1
ENSG00000064932	ENSMUSG00000035673	SBNO2	Sbno2	Conserved	10.9292	12.2808	-0.725842	2	1	0.333719	1
ENSG00000064933	ENSMUSG00000026098	PMS1	Pms1	Other	8.48415	7.69376	1.41611	1	0	0.000142996	1
ENSG00000064961	ENSMUSG00000020232	HMG20B	Hmg20b	Other	8.49805	9.18921	-0.0654403	0	1	0.431981	1
ENSG00000064989	ENSMUSG00000059588	CALCRL	Calcrl	Other	3.95789	9.47649	-4.89289	0	1	4.15855e-07	0.00588809
ENSG00000065000	ENSMUSG00000020198	AP3D1	Ap3d1	Other	10.903	11.9331	-0.404402	0	1	0.779116	1
ENSG00000065029	ENSMUSG00000024220	ZNF76	Zfp523	Other	8.639	8.00079	1.26393	1	2	0.00163735	1
ENSG00000065135	ENSMUSG00000000001	GNAI3	Gnai3	Conserved	10.6725	12.7896	-1.49131	1	1	0.00104805	1
ENSG00000065150	ENSMUSG00000030662	IPO5	Ipo5	Other	11.2394	11.7727	0.0924243	0	1	0.0106455	1
ENSG00000065154	ENSMUSG00000030934	OAT	Oat	Other	8.67202	9.8187	-0.520957	2	0	0.841797	1
ENSG00000065183	ENSMUSG00000033285	WDR3	Wdr3	Other	9.86609	10.8814	-0.389565	0	0	0.390289	1
ENSG00000065243	ENSMUSG00000004591	PKN2	Pkn2	Conserved	9.88453	10.9251	-0.4148	1	2	0.609351	1
ENSG00000065268	ENSMUSG00000035754	WDR18	Wdr18	Other	7.88594	9.43691	-0.925247	0	0	0.0250298	1
ENSG00000065308	ENSMUSG00000041779	TRAM2	Tram2	Other	7.32419	8.2843	-0.334395	2	0	0.320841	1
ENSG00000065320	ENSMUSG00000020902	NTN1	Ntn1	Other	3.27249	3.89002	0.00819862	0	1	0.615549	1
ENSG00000065325	ENSMUSG00000049928	GLP2R	Glp2r	Other	0.0670078	1.47969	-0.786962	0	0	0.0490285	1
ENSG00000065328	ENSMUSG00000026669	MCM10	Mcm10	Other	9.05664	8.32831	1.35405	0	0	0.552211	1
ENSG00000065357	ENSMUSG00000025357	DGKA	Dgka	Other	11.8834	14.4845	-1.9754	0	0	0.00379223	1
ENSG00000065361	ENSMUSG00000018166	ERBB3	Erbb3	Other	5.38881	7.88671	-1.87217	1	0	0.000100488	1
ENSG00000065413	ENSMUSG00000052331	ANKRD44	Ankrd44	Conserved	11.816	13.2245	-0.78277	12	8	0.418253	1
ENSG00000065427	ENSMUSG00000031948	KARS	Kars	Other	11.0048	11.5753	0.0551634	0	0	0.0205121	1
ENSG00000065457	ENSMUSG00000031949	ADAT1	Adat1	Alternative	8.35055	8.32675	0.649523	1	2	0.0135533	1
ENSG00000065485	ENSMUSG00000022844	PDIA5	Pdia5	Other	6.71934	2.8049	4.54017	0	1	2.18578e-05	0.285047
ENSG00000065518	ENSMUSG00000022820	NDUFB4	Ndufb4	Other	8.75666	8.45853	0.92386	0	0	0.00206404	1
ENSG00000065526	ENSMUSG00000040761	SPEN	Spen	Other	11.3238	11.0083	0.94129	5	0	0.00700214	1
ENSG00000065534	ENSMUSG00000022836	MYLK	Mylk	Alternative	5.87008	2.30454	4.19126	1	1	1.97253e-05	0.258007
ENSG00000065548	ENSMUSG00000027091	ZC3H15	Zc3h15	Other	10.376	11.8196	-0.817854	0	0	0.453741	1
ENSG00000065559	ENSMUSG00000033352	MAP2K4	Map2k4	Other	9.28272	10.5226	-0.614178	0	1	0.101957	1
ENSG00000065600	ENSMUSG00000026627	TMEM206	Tmem206	Other	6.97876	7.78756	-0.183085	0	0	0.447216	1
ENSG00000065609	ENSMUSG00000033419	SNAP91	Snap91	Other	0.657445	4.54403	-3.26086	0	0	0.000477067	1
ENSG00000065613	ENSMUSG00000025060	SLK	Slk	Other	10.5313	12.0532	-0.896186	1	0	0.270328	1
ENSG00000065615	ENSMUSG00000032872	CYB5R4	Cyb5r4	Conserved	8.97481	12.3165	-2.71599	1	1	0.00171197	1
ENSG00000065618	ENSMUSG00000025064	COL17A1	Col17a1	Other	2.87141	2.88609	0.611038	0	0	0.330781	1
ENSG00000065621	ENSMUSG00000025069	GSTO2	Gsto2	Other	5.70236	1.87263	4.45545	2	0	1.62907e-07	0.00233788
ENSG00000065665	ENSMUSG00000025816	SEC61A2	Sec61a2	Other	8.25616	7.74586	1.13602	0	0	0.00977449	1
ENSG00000065675	ENSMUSG00000026778	PRKCQ	Prkcq	Conserved	10.0143	12.9281	-2.28814	18	14	0.000161923	1
ENSG00000065717	ENSMUSG00000034771	TLE2	Tle2	Other	4.71556	4.39918	0.942099	0	0	0.557866	1
ENSG00000065802	ENSMUSG00000026311	ASB1	Asb1	Other	8.73467	8.60614	0.754245	1	0	0.000449121	1
ENSG00000065809	ENSMUSG00000026655	FAM107B	Fam107b	Conserved	12.5968	14.9315	-1.70892	8	6	0.149715	1
ENSG00000065833	ENSMUSG00000032418	ME1	Me1	Other	2.63959	4.96339	-1.69808	0	2	0.00670516	1
ENSG00000065882	ENSMUSG00000029174	TBC1D1	Tbc1d1	Conserved	8.9707	11.1165	-1.52009	10	8	2.05299e-06	0.0283497
ENSG00000065883	ENSMUSG00000041297	CDK13	Cdk13	Other	10.3439	11.9024	-0.932813	4	1	0.237026	1
ENSG00000065911	ENSMUSG00000005667	MTHFD2	Mthfd2	Other	11.3966	10.5393	1.48302	2	0	0.0191807	1
ENSG00000065923	ENSMUSG00000037341	SLC9A7	Slc9a7	Other	8.9017	6.46035	3.06707	2	0	5.74824e-06	0.0776415
ENSG00000065970	ENSMUSG00000003154	FOXJ2	Foxj2	Other	9.01141	10.5249	-0.88781	3	1	0.26872	1
ENSG00000065989	ENSMUSG00000032177	PDE4A	Pde4a	Conserved	7.66247	6.10544	2.18275	6	1	0.00117555	1
ENSG00000066027	ENSMUSG00000026626	PPP2R5A	Ppp2r5a	Other	9.84711	12.5452	-2.07235	5	0	0.00100882	1
ENSG00000066032	ENSMUSG00000063063	CTNNA2	Ctnna2	Other	2.0968	0.525874	2.19665	0	0	0.197476	1
ENSG00000066044	ENSMUSG00000040028	ELAVL1	Elavl1	Other	10.037	11.5843	-0.921591	0	1	0.0916355	1
ENSG00000066056	ENSMUSG00000033191	TIE1	Tie1	Other	4.27064	3.33121	1.56515	0	0	0.118366	1
ENSG00000066084	ENSMUSG00000023026	DIP2B	Dip2b	Other	9.95104	11.7886	-1.21183	2	2	0.0189879	1
ENSG00000066117	ENSMUSG00000023018	SMARCD1	Smarcd1	Conserved	9.59572	9.96615	0.255293	1	1	0.0284542	1
ENSG00000066135	ENSMUSG00000033326	KDM4A	Kdm4a	Other	9.08885	10.8429	-1.12829	0	0	0.40759	1
ENSG00000066136	ENSMUSG00000032897	NFYC	Nfyc	Other	8.64751	10.3957	-1.12248	0	0	0.0381917	1
ENSG00000066185	ENSMUSG00000070806	ZMYND12	Zmynd12	Other	0.680202	0.856222	0.449702	0	0	0.267854	1
ENSG00000066230	ENSMUSG00000036123	SLC9A3	Slc9a3	Other	6.23151	0.782923	6.07431	1	0	2.80684e-11	4.26836e-07
ENSG00000066248	ENSMUSG00000026259	NGEF	Ngef	Mm-Specific	1.24888	0.101442	1.77316	0	1	0.765834	1
ENSG00000066279	ENSMUSG00000033952	ASPM	Aspm	Other	10.7758	10.5518	0.849715	1	0	0.626391	1
ENSG00000066294	ENSMUSG00000038147	CD84	Cd84	Other	9.44993	11.9605	-1.88482	1	4	7.78607e-05	0.974971
ENSG00000066322	ENSMUSG00000006390	ELOVL1	Elovl1	Other	8.74299	10.3379	-0.969171	1	0	0.0586868	1
ENSG00000066336	ENSMUSG00000002111	SPI1	Spi1	Other	1.4647	-3.8171	5.90753	0	1	0.188499	1
ENSG00000066379	ENSMUSG00000036315	ZNRD1	Znrd1	Other	8.12487	9.38587	-0.635275	0	0	0.875547	1
ENSG00000066382	ENSMUSG00000016386	MPPED2	Mpped2	Other	3.13646	2.82576	0.936427	0	0	0.107818	1
ENSG00000066405	ENSMUSG00000032473	CLDN18	Cldn18	Other	1.18643	-3.401	5.21316	0	0	0.00421777	1
ENSG00000066422	ENSMUSG00000022601	ZBTB11	Zbtb11	Other	10.2036	11.0276	-0.198293	1	0	0.122535	1
ENSG00000066455	ENSMUSG00000021192	GOLGA5	Golga5	Other	8.58323	10.1322	-0.923293	1	0	0.145233	1
ENSG00000066468	ENSMUSG00000030849	FGFR2	Fgfr2	Other	3.31645	-1.61475	5.55692	0	6	0.00970074	1
ENSG00000066557	ENSMUSG00000063052	LRRC40	Lrrc40	Other	9.07324	8.60981	1.08915	0	0	2.45459e-05	0.319244
ENSG00000066583	ENSMUSG00000024601	ISOC1	Isoc1	Other	8.18926	9.41686	-0.601877	1	0	0.422763	1
ENSG00000066629	ENSMUSG00000058070	EML1	Eml1	Other	3.81499	4.79251	-0.351793	0	2	0.0401202	1
ENSG00000066651	ENSMUSG00000019792	TRMT11	Trmt11	Other	8.0654	8.17425	0.516871	0	0	0.0274305	1
ENSG00000066654	ENSMUSG00000030942	THUMPD1	Thumpd1	Other	10.1422	10.5271	0.240829	1	0	0.0115275	1
ENSG00000066697	ENSMUSG00000039693	MSANTD3	Msantd3	Other	6.74906	-Inf	Inf	0	0	9.98712e-14	1.53562e-09
ENSG00000066735	ENSMUSG00000021294	KIF26A	Kif26a	Other	2.60298	-3.14589	6.3746	0	0	0.00116628	1
ENSG00000066739	ENSMUSG00000041341	ATG2B	Atg2b	Other	10.6272	10.6054	0.647568	0	0	0.00261896	1
ENSG00000066777	ENSMUSG00000067851	ARFGEF1	Arfgef1	Other	10.809	12.3061	-0.871421	0	0	0.292097	1
ENSG00000066827	ENSMUSG00000022335	ZFAT	Zfat	Conserved	6.74302	7.34222	0.0265277	8	1	0.360764	1
ENSG00000066855	ENSMUSG00000027601	MTFR1	Mtfr1	Other	7.50548	9.82186	-1.69066	0	0	5.43696e-06	0.0735295
ENSG00000066923	ENSMUSG00000036928	STAG3	Stag3	Other	8.64663	6.38651	2.88584	0	0	1.7153e-06	0.0237518
ENSG00000066926	ENSMUSG00000024588	FECH	Fech	Other	7.58326	9.14735	-0.938377	0	0	0.00580263	1
ENSG00000066933	ENSMUSG00000039585	MYO9A	Myo9a	Other	9.04167	10.1799	-0.51251	0	0	0.613874	1
ENSG00000067048	ENSMUSG00000069045	DDX3Y	Ddx3y	Other	11.2875	6.3655	5.5477	0	0	0.000277209	1
ENSG00000067057	ENSMUSG00000021196	PFKP	Pfkp	Other	11.6821	13.1648	-0.856978	2	5	0.155966	1
ENSG00000067064	ENSMUSG00000058258	IDI1	Idi1	Other	10.7944	10.9306	0.489568	2	0	0.00283954	1
ENSG00000067082	ENSMUSG00000000078	KLF6	Klf6	Conserved	13.3651	12.6509	1.33987	21	20	0.13866	1
ENSG00000067113	ENSMUSG00000021759	PLPP1	Plpp1	Other	5.95835	1.97335	4.61072	0	0	2.03955e-09	3.03975e-05
ENSG00000067141	ENSMUSG00000032340	NEO1	Neo1	Other	7.23182	1.27082	6.58673	1	0	7.07591e-12	1.08021e-07
ENSG00000067167	ENSMUSG00000025935	TRAM1	Tram1	Conserved	11.406	12.3404	-0.308713	1	2	0.102477	1
ENSG00000067177	ENSMUSG00000034055	PHKA1	Phka1	Other	6.09732	0.273605	6.44944	0	0	7.05811e-06	0.0949599
ENSG00000067182	ENSMUSG00000030341	TNFRSF1A	Tnfrsf1a	Conserved	8.5382	9.62523	-0.461306	3	1	0.308796	1
ENSG00000067191	ENSMUSG00000020882	CACNB1	Cacnb1	Other	7.25687	7.48218	0.40041	0	1	0.10411	1
ENSG00000067208	ENSMUSG00000011831	EVI5	Evi5	Conserved	5.66706	7.50433	-1.21155	1	7	0.043523	1
ENSG00000067221	ENSMUSG00000032333	STOML1	Stoml1	Conserved	6.26838	8.60422	-1.71012	1	2	0.000268391	1
ENSG00000067225	ENSMUSG00000032294	PKM	Pkm	Conserved	14.342	15.4429	-0.475193	3	2	0.950807	1
ENSG00000067248	ENSMUSG00000042426	DHX29	Dhx29	Other	9.14867	8.98869	0.785696	0	0	2.15494e-06	0.0297274
ENSG00000067334	ENSMUSG00000039756	DNTTIP2	Dnttip2	Other	10.2515	11.0229	-0.145683	1	0	0.0993293	1
ENSG00000067365	ENSMUSG00000039345	METTL22	Mettl22	Other	7.32742	7.65174	0.301396	0	1	0.0615905	1
ENSG00000067369	ENSMUSG00000043909	TP53BP1	Trp53bp1	Other	9.77198	10.8591	-0.461438	0	0	0.526997	1
ENSG00000067445	ENSMUSG00000025272	TRO	Tro	Other	4.43457	-0.0180047	5.0783	0	0	5.21657e-05	0.662295
ENSG00000067533	ENSMUSG00000001305	RRP15	Rrp15	Other	9.22457	8.453	1.3973	1	0	0.00443639	1
ENSG00000067560	ENSMUSG00000007815	RHOA	Rhoa	Other	11.6466	12.8696	-0.597306	0	0	0.875479	1
ENSG00000067596	ENSMUSG00000034931	DHX8	Dhx8	Other	10.1933	10.6404	0.178696	1	0	0.0278389	1
ENSG00000067606	ENSMUSG00000029053	PRKCZ	Prkcz	Other	6.34234	8.86863	-1.90057	1	0	0.00217066	1
ENSG00000067704	ENSMUSG00000026618	IARS2	Iars2	Other	10.3143	10.6798	0.260178	1	0	0.00337695	1
ENSG00000067715	ENSMUSG00000035864	SYT1	Syt1	Other	0.532207	-3.59571	4.75364	0	0	0.09484	1
ENSG00000067798	ENSMUSG00000020181	NAV3	Nav3	Other	6.79491	2.57069	4.84994	0	0	1.28089e-05	0.16959
ENSG00000067829	ENSMUSG00000002010	IDH3G	Idh3g	Other	8.56342	11.0921	-1.903	0	0	0.000217285	1
ENSG00000067836	ENSMUSG00000022540	ROGDI	Rogdi	Other	5.27212	6.53429	-0.63645	0	0	0.214517	1
ENSG00000067840	ENSMUSG00000002006	PDZD4	Pdzd4	Other	5.74983	5.53998	0.835571	2	0	0.48099	1
ENSG00000067842	ENSMUSG00000031376	ATP2B3	Atp2b3	Other	2.44187	-0.635716	3.70331	0	1	0.287637	1
ENSG00000067955	ENSMUSG00000031885	CBFB	Cbfb	Other	11.4409	12.6321	-0.565532	3	0	0.860321	1
ENSG00000067992	ENSMUSG00000035232	PDK3	Pdk3	Other	8.89326	9.55686	-0.0378776	1	0	0.0662398	1
ENSG00000068001	ENSMUSG00000010047	HYAL2	Hyal2	Other	5.95361	6.32192	0.25741	1	0	0.665914	1
ENSG00000068024	ENSMUSG00000026313	HDAC4	Hdac4	Conserved	9.4466	10.7711	-0.698728	14	7	0.532701	1
ENSG00000068028	ENSMUSG00000010067	RASSF1	Rassf1	Other	9.00242	10.1683	-0.540209	1	0	0.594846	1
ENSG00000068078	ENSMUSG00000054252	FGFR3	Fgfr3	Other	2.87177	3.15296	0.34453	0	0	0.112323	1
ENSG00000068079	ENSMUSG00000010358	IFI35	Ifi35	Other	8.71419	9.76235	-0.422436	1	0	0.77024	1
ENSG00000068097	ENSMUSG00000000976	HEATR6	Heatr6	Other	7.79335	10.2676	-1.84853	0	0	7.20011e-07	0.0101226
ENSG00000068120	ENSMUSG00000001755	COASY	Coasy	Other	8.99968	8.74321	0.882193	1	0	0.000462402	1
ENSG00000068137	ENSMUSG00000035172	PLEKHH3	Plekhh3	Other	4.41792	4.33673	0.706914	1	0	0.61484	1
ENSG00000068305	ENSMUSG00000030557	MEF2A	Mef2a	Conserved	9.33284	11.2803	-1.32175	1	2	0.00888017	1
ENSG00000068308	ENSMUSG00000031154	OTUD5	Otud5	Conserved	9.84988	12.3333	-1.8577	1	1	1.95976e-05	0.256454
ENSG00000068323	ENSMUSG00000000134	TFE3	Tfe3	Other	8.93524	10.3351	-0.77419	0	0	0.844466	1
ENSG00000068354	ENSMUSG00000039201	TBC1D25	Tbc1d25	Other	8.22942	7.78458	1.07056	1	0	0.0143908	1
ENSG00000068366	ENSMUSG00000031278	ACSL4	Acsl4	Other	10.3855	12.7118	-1.70064	0	1	0.00976797	1
ENSG00000068383	ENSMUSG00000025477	INPP5A	Inpp5a	Other	7.78014	8.9184	-0.512542	1	0	0.667579	1
ENSG00000068394	ENSMUSG00000031148	GPKOW	Gpkow	Other	7.74349	10.9696	-2.60042	1	0	8.16298e-08	0.0011811
ENSG00000068400	ENSMUSG00000031153	GRIPAP1	Gripap1	Other	10.3992	10.5041	0.520841	0	0	0.0269773	1
ENSG00000068438	ENSMUSG00000031171	FTSJ1	Ftsj1	Other	9.29611	8.25852	1.6633	0	0	6.31947e-08	0.000916955
ENSG00000068489	ENSMUSG00000020493	PRR11	Prr11	Other	8.61859	9.56022	-0.315908	0	0	0.680264	1
ENSG00000068615	ENSMUSG00000052852	REEP1	Reep1	Other	2.6473	5.5741	-2.30108	0	0	0.00100094	1
ENSG00000068650	ENSMUSG00000031441	ATP11A	Atp11a	Other	9.50055	11.0018	-0.87548	4	0	0.13002	1
ENSG00000068654	ENSMUSG00000049553	POLR1A	Polr1a	Alternative	10.1721	11.3395	-0.541592	5	3	0.884697	1
ENSG00000068697	ENSMUSG00000020585	LAPTM4A	Laptm4a	Other	9.04441	10.3696	-0.699499	0	0	0.186851	1
ENSG00000068724	ENSMUSG00000036918	TTC7A	Ttc7	Other	9.7402	10.1965	0.169414	1	0	0.0582651	1
ENSG00000068745	ENSMUSG00000032599	IP6K2	Ip6k2	Other	9.31028	9.63295	0.303054	0	1	0.000608061	1
ENSG00000068784	ENSMUSG00000024135	SRBD1	Srbd1	Other	7.93046	8.93629	-0.380105	2	0	0.209393	1
ENSG00000068796	ENSMUSG00000021693	KIF2A	Kif2a	Other	11.0196	11.7886	-0.143258	4	2	0.057345	1
ENSG00000068831	ENSMUSG00000032946	RASGRP2	Rasgrp2	Other	10.7235	11.1268	0.222393	3	0	0.348253	1
ENSG00000068878	ENSMUSG00000040850	PSME4	Psme4	Other	10.9518	11.4414	0.136172	0	0	0.0431437	1
ENSG00000068885	ENSMUSG00000027778	IFT80	Ift80	Mm-Specific	8.78206	11.2139	-1.80611	0	1	0.00255712	1
ENSG00000068903	ENSMUSG00000015149	SIRT2	Sirt2	Other	8.6597	11.7159	-2.4305	0	3	1.11044e-06	0.0155095
ENSG00000068912	ENSMUSG00000020311	ERLEC1	Erlec1	Other	9.05823	10.096	-0.412044	0	0	0.685512	1
ENSG00000068971	ENSMUSG00000024777	PPP2R5B	Ppp2r5b	Conserved	7.21422	7.83467	0.00527362	1	1	0.218308	1
ENSG00000068976	ENSMUSG00000032648	PYGM	Pygm	Other	6.68917	6.92129	0.3936	0	0	0.504507	1
ENSG00000069011	ENSMUSG00000021506	PITX1	Pitx1	Other	2.592	-4.12217	7.33989	0	0	0.00176588	1
ENSG00000069018	ENSMUSG00000021541	TRPC7	Trpc7	Other	-4.55835	2.05779	-5.99042	0	0	0.00930016	1
ENSG00000069020	ENSMUSG00000034751	MAST4	Mast4	Conserved	10.1026	8.29449	2.43388	5	2	6.96337e-05	0.874878
ENSG00000069122	ENSMUSG00000056492	ADGRF5	Adgrf5	Other	-0.713426	2.44658	-2.53428	0	0	0.000107469	1
ENSG00000069188	ENSMUSG00000041592	SDK2	Sdk2	Alternative	6.42784	4.30898	2.74459	2	1	0.000666192	1
ENSG00000069206	ENSMUSG00000022056	ADAM7	Adam7	Other	-2.21103	-3.59323	2.00792	0	0	0.161992	1
ENSG00000069248	ENSMUSG00000039509	NUP133	Nup133	Other	9.92085	8.94416	1.60241	1	0	7.15103e-06	0.0961885
ENSG00000069275	ENSMUSG00000026434	NUCKS1	Nucks1	Other	11.8414	12.0035	0.463623	1	0	0.000688788	1
ENSG00000069329	ENSMUSG00000031696	VPS35	Vps35	Other	10.4814	11.587	-0.479855	0	0	0.992748	1
ENSG00000069345	ENSMUSG00000031701	DNAJA2	Dnaja2	Other	10.5584	12.6171	-1.43295	1	0	0.0253388	1
ENSG00000069399	ENSMUSG00000053175	BCL3	Bcl3	Conserved	8.63455	10.9515	-1.69123	5	2	0.0913666	1
ENSG00000069424	ENSMUSG00000028931	KCNAB2	Kcnab2	Conserved	10.9134	11.795	-0.255902	7	2	0.243127	1
ENSG00000069431	ENSMUSG00000030249	ABCC9	Abcc9	Other	6.08308	4.30786	2.40094	0	0	0.000151858	1
ENSG00000069482	ENSMUSG00000024907	GAL	Gal	Other	-1.07176	-3.11513	2.66909	0	0	0.693757	1
ENSG00000069509	ENSMUSG00000025040	FUNDC1	Fundc1	Other	6.66514	9.89215	-2.60128	0	0	5.32175e-05	0.675171
ENSG00000069535	ENSMUSG00000040147	MAOB	Maob	Other	2.18695	-Inf	Inf	0	0	0.00312005	1
ENSG00000069667	ENSMUSG00000032238	RORA	Rora	Conserved	12.219	11.0668	1.77794	18	10	0.000595317	1
ENSG00000069696	ENSMUSG00000025496	DRD4	Drd4	Other	2.8546	-2.75339	6.23371	0	0	0.00113641	1
ENSG00000069702	ENSMUSG00000029287	TGFBR3	Tgfbr3	Conserved	9.78868	10.1453	0.269094	13	10	0.175338	1
ENSG00000069764	ENSMUSG00000022683	PLA2G10	Pla2g10	Other	2.61519	0.867031	2.37388	0	0	0.254844	1
ENSG00000069812	ENSMUSG00000028940	HES2	Hes2	Other	3.55495	-0.61326	4.79394	1	0	6.54643e-06	0.0881935
ENSG00000069849	ENSMUSG00000032412	ATP1B3	Atp1b3	Other	9.85381	13.3914	-2.91187	1	0	6.14303e-08	0.000891661
ENSG00000069869	ENSMUSG00000032216	NEDD4	Nedd4	Other	10.2388	9.64133	1.2232	1	1	0.010836	1
ENSG00000069943	ENSMUSG00000079469	PIGB	Pigb	Other	8.20093	9.64548	-0.818835	1	0	0.299431	1
ENSG00000069956	ENSMUSG00000042688	MAPK6	Mapk6	Conserved	10.5987	11.8502	-0.625804	3	4	0.547105	1
ENSG00000069966	ENSMUSG00000032192	GNB5	Gnb5	Other	8.60224	7.35905	1.86892	1	1	3.0386e-05	0.392436
ENSG00000069974	ENSMUSG00000032202	RAB27A	Rab27a	Conserved	10.189	10.6542	0.160594	10	4	0.222934	1
ENSG00000069998	ENSMUSG00000058979	HDHD5	Hdhd5	Other	8.14923	10.2948	-1.51981	4	0	0.650482	1
ENSG00000070010	ENSMUSG00000005262	UFD1	Ufd1	Other	10.1409	10.6403	0.126327	0	0	0.0173588	1
ENSG00000070018	ENSMUSG00000030201	LRP6	Lrp6	Other	6.48438	10.7212	-3.6111	2	0	2.30898e-07	0.00329907
ENSG00000070019	ENSMUSG00000042638	GUCY2C	Gucy2c	Other	-1.57632	0.882801	-1.8334	1	1	0.00363707	1
ENSG00000070031	ENSMUSG00000038580	SCT	Sct	Other	0.963954	-Inf	Inf	0	0	0.0225467	1
ENSG00000070047	ENSMUSG00000038611	PHRF1	Phrf1	Other	9.74047	11.3229	-0.956678	1	0	0.0945558	1
ENSG00000070061	ENSMUSG00000028431	ELP1	Elp1	Other	9.93495	9.93322	0.627452	0	0	5.65364e-05	0.715525
ENSG00000070081	ENSMUSG00000030659	NUCB2	Nucb2	Alternative	9.44982	6.39485	3.68069	4	1	1.17171e-07	0.00168879
ENSG00000070087	ENSMUSG00000027805	PFN2	Pfn2	Other	5.74777	7.19369	-0.8202	0	0	0.0479839	1
ENSG00000070159	ENSMUSG00000038764	PTPN3	Ptpn3	Other	5.6391	8.31548	-2.05066	0	4	0.0385967	1
ENSG00000070182	ENSMUSG00000021061	SPTB	Sptb	Other	3.9502	4.94082	-0.364897	1	0	0.272568	1
ENSG00000070190	ENSMUSG00000028159	DAPP1	Dapp1	Other	9.91576	10.4657	0.0757846	1	5	0.730344	1
ENSG00000070193	ENSMUSG00000021732	FGF10	Fgf10	Other	-1.31343	0.591938	-1.27965	0	0	0.018491	1
ENSG00000070214	ENSMUSG00000028412	SLC44A1	Slc44a1	Other	7.9516	9.51053	-0.933209	5	0	0.126773	1
ENSG00000070269	ENSMUSG00000036339	TMEM260	Tmem260	Other	7.75989	10.0003	-1.61469	2	1	0.000138302	1
ENSG00000070366	ENSMUSG00000038290	SMG6	Smg6	Conserved	9.13312	10.6488	-0.889925	9	7	0.517497	1
ENSG00000070367	ENSMUSG00000061244	EXOC5	Exoc5	Other	10.3316	11.6955	-0.738201	1	0	0.39724	1
ENSG00000070388	ENSMUSG00000020327	FGF22	Fgf22	Other	2.38287	2.24929	0.759307	0	0	0.787329	1
ENSG00000070404	ENSMUSG00000020325	FSTL3	Fstl3	Other	3.94027	2.83715	1.72885	0	0	0.00816632	1
ENSG00000070423	ENSMUSG00000035890	RNF126	Rnf126	Other	9.35873	9.48092	0.503526	2	0	0.0502006	1
ENSG00000070444	ENSMUSG00000000282	MNT	Mnt	Conserved	8.88257	10.4952	-0.986879	4	3	0.0205681	1
ENSG00000070476	ENSMUSG00000034430	ZXDC	Zxdc	Other	8.93064	9.33061	0.225749	0	0	0.0255044	1
ENSG00000070495	ENSMUSG00000056962	JMJD6	Jmjd6	Other	9.29425	10.0342	-0.114238	2	0	0.122534	1
ENSG00000070501	ENSMUSG00000031536	POLB	Polb	Other	8.26932	9.18608	-0.291036	1	0	0.921311	1
ENSG00000070526	ENSMUSG00000009588	ST6GALNAC1	St6galnac1	Other	5.07443	2.68386	3.0163	0	0	0.000481969	1
ENSG00000070540	ENSMUSG00000041895	WIPI1	Wipi1	Other	7.42196	5.56236	2.48532	4	0	1.15199e-08	0.000169769
ENSG00000070601	ENSMUSG00000035615	FRMPD1	Frmpd1	Other	1.81433	-0.564763	3.00481	0	0	0.00459598	1
ENSG00000070610	ENSMUSG00000028467	GBA2	Gba2	Other	8.92648	9.6541	-0.101892	0	0	0.132122	1
ENSG00000070614	ENSMUSG00000054008	NDST1	Ndst1	Other	3.76144	10.0462	-5.65903	0	0	1.06884e-06	0.0149349
ENSG00000070669	ENSMUSG00000029752	ASNS	Asns	Other	8.54542	7.99336	1.17779	1	0	0.0034449	1
ENSG00000070718	ENSMUSG00000031539	AP3M2	Ap3m2	Conserved	10.0393	9.85585	0.809149	7	3	0.00210378	1
ENSG00000070729	ENSMUSG00000031789	CNGB1	Cngb1	Other	4.03681	3.6431	1.01943	0	0	0.233443	1
ENSG00000070731	ENSMUSG00000057286	ST6GALNAC2	St6galnac2	Other	2.74534	6.06413	-2.69307	0	1	1.26462e-09	1.89035e-05
ENSG00000070748	ENSMUSG00000021919	CHAT	Chat	Other	1.46222	-0.365247	2.45319	0	0	0.9649	1
ENSG00000070756	ENSMUSG00000022283	PABPC1	Pabpc1	Other	14.4175	15.6127	-0.569421	2	6	0.967134	1
ENSG00000070759	ENSMUSG00000033985	TESK2	Tesk2	Other	6.0616	7.33635	-0.64903	0	0	0.0373508	1
ENSG00000070761	ENSMUSG00000031796	CFAP20	Cfap20	Other	8.83349	9.77543	-0.316219	1	1	0.531683	1
ENSG00000070770	ENSMUSG00000046707	CSNK2A2	Csnk2a2	Other	10.1112	11.1304	-0.393479	0	0	0.884261	1
ENSG00000070778	ENSMUSG00000021009	PTPN21	Ptpn21	Other	2.30158	6.55492	-3.62762	1	0	2.43852e-09	3.63022e-05
ENSG00000070785	ENSMUSG00000028683	EIF2B3	Eif2b3	Other	8.14313	8.10145	0.667405	1	0	0.372337	1
ENSG00000070808	ENSMUSG00000024617	CAMK2A	Camk2a	Other	3.87351	2.55806	1.94118	0	1	0.203337	1
ENSG00000070814	ENSMUSG00000024613	TCOF1	Tcof1	Other	9.89462	11.2901	-0.769789	0	0	0.723676	1
ENSG00000070882	ENSMUSG00000029822	OSBPL3	Osbpl3	Alternative	10.5398	9.05738	2.10814	8	2	5.84836e-05	0.739116
ENSG00000070886	ENSMUSG00000028661	EPHA8	Epha8	Other	0.82537	-2.64285	4.09395	0	0	0.66913	1
ENSG00000070915	ENSMUSG00000031766	SLC12A3	Slc12a3	Alternative	1.47496	4.82949	-2.72881	2	2	0.00154966	1
ENSG00000070950	ENSMUSG00000030254	RAD18	Rad18	Other	8.78365	9.69019	-0.280825	1	0	0.662489	1
ENSG00000070961	ENSMUSG00000019943	ATP2B1	Atp2b1	Conserved	9.88924	13.9739	-3.45899	6	14	4.39011e-05	0.560397
ENSG00000070985	ENSMUSG00000009246	TRPM5	Trpm5	Other	1.49683	0.67644	1.44611	0	0	0.804353	1
ENSG00000071051	ENSMUSG00000066877	NCK2	Nck2	Alternative	9.81458	9.3552	1.0851	6	10	7.77539e-05	0.973712
ENSG00000071054	ENSMUSG00000026074	MAP4K4	Map4k4	Other	11.4461	13.7528	-1.68096	3	1	0.0122696	1
ENSG00000071073	ENSMUSG00000026110	MGAT4A	Mgat4a	Alternative	11.2202	10.5539	1.29205	4	3	0.000117966	1
ENSG00000071127	ENSMUSG00000005103	WDR1	Wdr1	Conserved	12.3727	13.4855	-0.487041	5	2	0.373684	1
ENSG00000071189	ENSMUSG00000020590	SNX13	Snx13	Other	9.43777	9.99011	0.0733838	0	0	0.065891	1
ENSG00000071203	ENSMUSG00000101031	MS4A12	Ms4a12	Other	-1.15905	-3.14118	2.60785	0	0	0.425327	1
ENSG00000071205	ENSMUSG00000037148	ARHGAP10	Arhgap10	Alternative	7.19179	8.68526	-0.867748	6	2	0.101596	1
ENSG00000071242	ENSMUSG00000023809	RPS6KA2	Rps6ka2	Other	7.34835	7.07188	0.902192	6	1	0.34934	1
ENSG00000071243	ENSMUSG00000029670	ING3	Ing3	Conserved	8.81542	9.8975	-0.456358	1	2	0.793677	1
ENSG00000071246	ENSMUSG00000021256	VASH1	Vash1	Alternative	6.61596	4.46233	2.77935	1	1	0.025449	1
ENSG00000071282	ENSMUSG00000057604	LMCD1	Lmcd1	Other	3.98661	-Inf	Inf	1	0	0.000754338	1
ENSG00000071462	ENSMUSG00000005378	BUD23	Bud23	Other	9.38524	9.8556	0.155362	2	0	0.0233351	1
ENSG00000071537	ENSMUSG00000020964	SEL1L	Sel1l	Other	10.9264	11.7099	-0.157792	0	4	0.0118052	1
ENSG00000071539	ENSMUSG00000021569	TRIP13	Trip13	Other	8.04129	8.26644	0.400572	1	0	0.895328	1
ENSG00000071553	ENSMUSG00000019087	ATP6AP1	Atp6ap1	Other	9.14362	10.894	-1.1247	0	0	0.250272	1
ENSG00000071564	ENSMUSG00000020167	TCF3	Tcf3	Conserved	9.14328	11.4669	-1.69794	1	4	0.00107594	1
ENSG00000071575	ENSMUSG00000020601	TRIB2	Trib2	Conserved	9.87025	13.5483	-3.05233	17	19	5.22457e-08	0.000759705
ENSG00000071626	ENSMUSG00000069565	DAZAP1	Dazap1	Other	10.9114	10.8083	0.728765	2	0	0.000134599	1
ENSG00000071655	ENSMUSG00000035478	MBD3	Mbd3	Other	9.15462	9.85734	-0.0769953	0	0	0.131943	1
ENSG00000071677	ENSMUSG00000090550	PRLH	Prlh	Other	-2.54839	-Inf	Inf	0	0	0.128199	1
ENSG00000071794	ENSMUSG00000002428	HLTF	Hltf	Other	8.39558	11.1423	-2.12096	1	1	0.000228616	1
ENSG00000071859	ENSMUSG00000001962	FAM50A	Fam50a	Other	8.67095	9.53372	-0.237041	0	0	0.380085	1
ENSG00000071889	ENSMUSG00000031399	FAM3A	Fam3a	Other	7.57803	8.89334	-0.689588	0	0	0.169402	1
ENSG00000071894	ENSMUSG00000034022	CPSF1	Cpsf1	Other	10.0094	11.2728	-0.63769	1	0	0.783566	1
ENSG00000071909	ENSMUSG00000042064	MYO3B	Myo3b	Alternative	3.41755	6.42957	-2.3863	2	3	2.28279e-09	3.39999e-05
ENSG00000071967	ENSMUSG00000027015	CYBRD1	Cybrd1	Other	4.39416	3.55512	1.46476	0	0	0.052222	1
ENSG00000071991	ENSMUSG00000047216	CDH19	Cdh19	Other	2.0186	-3.14118	5.7855	0	0	0.00665848	1
ENSG00000071994	ENSMUSG00000014771	PDCD2	Pdcd2	Other	9.65219	9.37133	0.906584	1	0	0.000995686	1
ENSG00000072041	ENSMUSG00000019894	SLC6A15	Slc6a15	Other	0.258605	1.40906	-0.524735	0	0	0.0155668	1
ENSG00000072042	ENSMUSG00000066441	RDH11	Rdh11	Other	9.31002	9.09655	0.839199	0	0	0.000566358	1
ENSG00000072062	ENSMUSG00000005469	PRKACA	Prkaca	Other	8.46606	9.53649	-0.444712	0	0	0.304372	1
ENSG00000072071	ENSMUSG00000013033	ADGRL1	Adgrl1	Other	7.12316	10.5662	-2.81728	3	0	0.000495913	1
ENSG00000072080	ENSMUSG00000026295	SPP2	Spp2	Other	5.25476	-Inf	Inf	5	1	1.04403e-05	0.13894
ENSG00000072110	ENSMUSG00000015143	ACTN1	Actn1	Other	8.154	12.4561	-3.67637	1	0	0.00226508	1
ENSG00000072121	ENSMUSG00000066440	ZFYVE26	Zfyve26	Other	9.19647	10.1153	-0.293065	0	0	0.625809	1
ENSG00000072133	ENSMUSG00000025665	RPS6KA6	Rps6ka6	Other	6.03261	0.487011	6.17132	0	0	5.57426e-07	0.00786472
ENSG00000072134	ENSMUSG00000001036	EPN2	Epn2	Other	5.71725	4.87833	1.46464	0	3	0.0217545	1
ENSG00000072135	ENSMUSG00000026126	PTPN18	Ptpn18	Other	8.92118	11.1809	-1.63403	2	1	0.0202287	1
ENSG00000072163	ENSMUSG00000024395	LIMS2	Lims2	Other	4.50667	2.07416	3.05823	0	0	0.001883	1
ENSG00000072182	ENSMUSG00000033007	ASIC4	Asic4	Other	2.4848	-0.0975099	3.20803	0	0	0.000959657	1
ENSG00000072195	ENSMUSG00000026207	SPEG	Speg	Other	4.53165	3.69551	1.46186	0	0	0.627797	1
ENSG00000072201	ENSMUSG00000029228	LNX1	Lnx1	Other	4.73774	3.721	1.64247	0	0	0.0272501	1
ENSG00000072210	ENSMUSG00000010025	ALDH3A2	Aldh3a2	Other	7.8001	10.2757	-1.84988	0	0	5.48346e-05	0.694864
ENSG00000072274	ENSMUSG00000022797	TFRC	Tfrc	Conserved	13.8453	11.8628	2.60817	3	1	3.60615e-05	0.463463
ENSG00000072310	ENSMUSG00000020538	SREBF1	Srebf1	Other	9.71585	11.639	-1.29744	0	0	0.105717	1
ENSG00000072315	ENSMUSG00000041710	TRPC5	Trpc5	Other	1.85797	0.87966	1.60404	0	0	0.511492	1
ENSG00000072364	ENSMUSG00000049470	AFF4	Aff4	Conserved	10.9278	12.1158	-0.56224	1	1	0.804392	1
ENSG00000072401	ENSMUSG00000019927	UBE2D1	Ube2d1	Other	8.35751	9.70237	-0.71914	1	0	0.118487	1
ENSG00000072415	ENSMUSG00000021112	MPP5	Mpp5	Other	7.89354	9.47735	-0.958095	0	0	0.349724	1
ENSG00000072422	ENSMUSG00000019944	RHOBTB1	Rhobtb1	Other	0.880963	4.34199	-2.8353	0	0	0.00330191	1
ENSG00000072501	ENSMUSG00000041133	SMC1A	Smc1a	Other	11.2018	12.2259	-0.398383	1	0	0.955506	1
ENSG00000072506	ENSMUSG00000025260	HSD17B10	Hsd17b10	Other	8.99469	9.50938	0.111028	0	0	0.299409	1
ENSG00000072518	ENSMUSG00000024969	MARK2	Mark2	Conserved	9.11971	12.003	-2.25756	5	1	0.00199922	1
ENSG00000072571	ENSMUSG00000020330	HMMR	Hmmr	Other	9.01378	10.4193	-0.779832	1	0	0.106724	1
ENSG00000072609	ENSMUSG00000014668	CHFR	Chfr	Conserved	10.0754	11.0576	-0.356496	1	1	0.474484	1
ENSG00000072657	ENSMUSG00000050663	TRHDE	Trhde	Other	1.74001	-3.27118	5.63692	0	0	0.00630741	1
ENSG00000072682	ENSMUSG00000018906	P4HA2	P4ha2	Other	5.57136	9.62784	-3.43076	0	5	2.33553e-05	0.304063
ENSG00000072736	ENSMUSG00000031902	NFATC3	Nfatc3	Other	10.5046	13.0405	-1.91019	2	1	0.0675789	1
ENSG00000072756	ENSMUSG00000013736	TRNT1	Trnt1	Other	8.72084	10.8796	-1.53299	0	0	6.22217e-05	0.78474
ENSG00000072778	ENSMUSG00000018574	ACADVL	Acadvl	Other	10.7936	10.4235	0.995893	0	0	7.64578e-05	0.95771
ENSG00000072786	ENSMUSG00000020272	STK10	Stk10	Conserved	11.2304	12.7867	-0.930639	13	3	0.289436	1
ENSG00000072803	ENSMUSG00000020271	FBXW11	Fbxw11	Alternative	10.2684	11.4753	-0.581193	1	1	0.911562	1
ENSG00000072818	ENSMUSG00000001588	ACAP1	Acap1	Conserved	10.9658	12.7728	-1.18128	2	2	0.222106	1
ENSG00000072832	ENSMUSG00000029121	CRMP1	Crmp1	Other	2.43158	9.59466	-6.53736	0	0	1.03862e-09	1.55408e-05
ENSG00000072840	ENSMUSG00000029122	EVC	Evc	Other	5.02528	4.13269	1.51831	0	0	0.0710464	1
ENSG00000072849	ENSMUSG00000018442	DERL2	Derl2	Other	9.30665	10.3849	-0.452567	0	0	0.716915	1
ENSG00000072858	ENSMUSG00000022696	SIDT1	Sidt1	Other	8.64406	10.9954	-1.72563	2	0	0.00078248	1
ENSG00000072864	ENSMUSG00000022678	NDE1	Nde1	Other	9.24678	10.8234	-0.950951	0	0	0.0183444	1
ENSG00000072952	ENSMUSG00000005611	MRVI1	Mrvi1	Other	1.67035	6.40356	-4.10749	0	2	2.93315e-05	0.37952
ENSG00000072954	ENSMUSG00000031791	TMEM38A	Tmem38a	Other	2.82678	5.73946	-2.28695	0	0	3.98276e-07	0.00564357
ENSG00000072958	ENSMUSG00000003033	AP1M1	Ap1m1	Conserved	9.70242	11.3523	-1.02419	3	2	0.167396	1
ENSG00000073008	ENSMUSG00000040511	PVR	Pvr	Other	6.47365	10.866	-3.76667	0	2	3.84945e-07	0.00545583
ENSG00000073050	ENSMUSG00000051768	XRCC1	Xrcc1	Other	7.52201	8.83	-0.682267	0	0	0.0717226	1
ENSG00000073060	ENSMUSG00000037936	SCARB1	Scarb1	Other	6.48074	7.95044	-0.843974	1	1	0.121014	1
ENSG00000073067	ENSMUSG00000029541	CYP2W1	Cyp2w1	Other	2.08709	-Inf	Inf	0	0	0.000659405	1
ENSG00000073111	ENSMUSG00000002870	MCM2	Mcm2	Other	10.3746	10.1218	0.87853	0	0	0.238701	1
ENSG00000073146	ENSMUSG00000015365	MOV10L1	Mov10l1	Other	2.11762	-Inf	Inf	0	0	0.000740513	1
ENSG00000073150	ENSMUSG00000058441	PANX2	Panx2	Other	2.56086	0.0674072	3.11917	0	0	0.0250997	1
ENSG00000073169	ENSMUSG00000035757	SELENOO	Selenoo	Other	8.44055	9.22962	-0.163349	0	1	0.793532	1
ENSG00000073282	ENSMUSG00000022510	TP63	Trp63	Other	3.37054	-Inf	Inf	0	0	6.13261e-08	0.00089027
ENSG00000073331	ENSMUSG00000028028	ALPK1	Alpk1	Other	8.78634	3.97266	5.4394	0	0	1.40711e-10	2.12559e-06
ENSG00000073350	ENSMUSG00000020782	LLGL2	Llgl2	Other	7.19216	8.0903	-0.272409	1	0	0.463298	1
ENSG00000073417	ENSMUSG00000025584	PDE8A	Pde8a	Conserved	8.91315	9.97186	-0.432991	4	2	0.455424	1
ENSG00000073464	ENSMUSG00000000605	CLCN4	Clcn4	Other	1.0379	11.2157	-9.55205	0	0	5.05e-20	7.80882e-16
ENSG00000073536	ENSMUSG00000020692	NLE1	Nle1	Conserved	8.29683	9.45468	-0.532137	1	1	0.728452	1
ENSG00000073578	ENSMUSG00000021577	SDHA	Sdha	Other	10.4674	12.4399	-1.34681	0	0	0.0565812	1
ENSG00000073584	ENSMUSG00000037935	SMARCE1	Smarce1	Other	10.372	11.7304	-0.732622	2	2	0.787102	1
ENSG00000073598	ENSMUSG00000018844	FNDC8	Fndc8	Other	1.46579	2.03143	0.0600825	0	0	0.273872	1
ENSG00000073614	ENSMUSG00000030180	KDM5A	Kdm5a	Other	11.3769	12.7013	-0.698677	0	3	0.791372	1
ENSG00000073670	ENSMUSG00000020926	ADAM11	Adam11	Other	3.00171	4.27824	-0.650806	0	0	0.052523	1
ENSG00000073711	ENSMUSG00000043154	PPP2R3A	Ppp2r3a	Other	4.99099	8.31432	-2.6976	0	0	0.00146507	1
ENSG00000073712	ENSMUSG00000037712	FERMT2	Fermt2	Other	5.2903	5.33413	0.581889	1	0	0.676751	1
ENSG00000073734	ENSMUSG00000027048	ABCB11	Abcb11	Other	3.40446	2.28268	1.7475	0	1	0.925165	1
ENSG00000073737	ENSMUSG00000027068	DHRS9	Dhrs9	Other	1.7059	5.96032	-3.62869	2	1	0.0242175	1
ENSG00000073754	ENSMUSG00000015854	CD5L	Cd5l	Other	-1.10385	-2.93358	2.45545	0	0	0.695912	1
ENSG00000073756	ENSMUSG00000032487	PTGS2	Ptgs2	Other	8.29691	5.4263	3.49633	1	0	0.476322	1
ENSG00000073792	ENSMUSG00000033581	IGF2BP2	Igf2bp2	Other	4.88417	5.33549	0.174406	1	3	0.337651	1
ENSG00000073803	ENSMUSG00000033618	MAP3K13	Map3k13	Other	7.2902	5.83148	2.08444	0	0	0.000242229	1
ENSG00000073849	ENSMUSG00000022885	ST6GAL1	St6gal1	Alternative	11.0099	11.2369	0.39871	5	3	0.0436714	1
ENSG00000073861	ENSMUSG00000001444	TBX21	Tbx21	Other	10.1837	11.7059	-0.896509	2	0	0.963801	1
ENSG00000073910	ENSMUSG00000056602	FRY	Fry	Other	7.15577	9.44913	-1.66764	1	0	0.00269846	1
ENSG00000073921	ENSMUSG00000039361	PICALM	Picalm	Conserved	10.8949	14.2967	-2.77608	6	7	9.01702e-07	0.0126337
ENSG00000073969	ENSMUSG00000034187	NSF	Nsf	Other	9.0598	10.3153	-0.629789	1	0	0.269305	1
ENSG00000074047	ENSMUSG00000048402	GLI2	Gli2	Other	3.47266	-Inf	Inf	0	0	0.00167094	1
ENSG00000074054	ENSMUSG00000064302	CLASP1	Clasp1	Other	10.4913	10.7201	0.397	2	1	0.00472118	1
ENSG00000074071	ENSMUSG00000038880	MRPS34	Mrps34	Other	8.87015	9.27622	0.219662	0	0	0.142222	1
ENSG00000074181	ENSMUSG00000038146	NOTCH3	Notch3	Other	3.05862	3.48352	0.200824	1	0	0.516711	1
ENSG00000074201	ENSMUSG00000025439	CLNS1A	Clns1a	Other	9.76222	10.734	-0.346076	0	1	0.683043	1
ENSG00000074211	ENSMUSG00000029120	PPP2R2C	Ppp2r2c	Other	2.10506	2.57422	0.156564	1	2	0.396183	1
ENSG00000074219	ENSMUSG00000030796	TEAD2	Tead2	Other	3.39853	6.57578	-2.55153	0	0	6.80414e-07	0.00957411
ENSG00000074266	ENSMUSG00000030619	EED	Eed	Conserved	10.5743	12.2237	-1.02366	5	4	0.72165	1
ENSG00000074276	ENSMUSG00000034918	CDHR2	Cdhr2	Other	4.46811	-2.93358	8.02741	3	0	8.96526e-09	0.000132381
ENSG00000074317	ENSMUSG00000034891	SNCB	Sncb	Other	-1.44969	1.55818	-2.38215	0	0	0.0198111	1
ENSG00000074319	ENSMUSG00000014402	TSG101	Tsg101	Other	8.77099	10.2815	-0.884742	1	0	0.173496	1
ENSG00000074356	ENSMUSG00000020783	NCBP3	Ncbp3	Conserved	10.0261	10.697	-0.0451511	1	1	0.0622403	1
ENSG00000074370	ENSMUSG00000020788	ATP2A3	Atp2a3	Other	11.3871	12.7669	-0.754127	3	2	0.886748	1
ENSG00000074410	ENSMUSG00000032373	CA12	Car12	Other	2.79124	8.77009	-5.35313	0	0	1.31725e-09	1.96837e-05
ENSG00000074416	ENSMUSG00000033174	MGLL	Mgll	Other	4.49471	9.23672	-4.11629	0	7	3.31705e-05	0.427302
ENSG00000074527	ENSMUSG00000020019	NTN4	Ntn4	Other	4.2143	1.50365	3.33637	0	0	0.545597	1
ENSG00000074582	ENSMUSG00000026172	BCS1L	Bcs1l	Conserved	7.7687	7.01443	1.37999	1	1	0.000114091	1
ENSG00000074590	ENSMUSG00000020032	NUAK1	Nuak1	Other	3.06582	2.74349	0.94805	0	0	0.262628	1
ENSG00000074603	ENSMUSG00000032393	DPP8	Dpp8	Other	9.77535	11.8488	-1.44777	1	1	7.2437e-05	0.908867
ENSG00000074621	ENSMUSG00000034452	SLC24A1	Slc24a1	Other	7.10721	6.29738	1.43555	1	0	0.00332991	1
ENSG00000074657	ENSMUSG00000042439	ZNF532	Zfp532	Other	6.03375	4.30287	2.3566	0	0	0.000496601	1
ENSG00000074660	ENSMUSG00000038188	SCARF1	Scarf1	Other	3.98921	4.33508	0.279856	0	0	0.710812	1
ENSG00000074695	ENSMUSG00000041891	LMAN1	Lman1	Other	11.5485	9.43748	2.73678	0	0	7.53607e-14	1.15897e-09
ENSG00000074696	ENSMUSG00000033629	HACD3	Hacd3	Other	9.50453	10.9619	-0.831635	0	2	0.0699596	1
ENSG00000074706	ENSMUSG00000064065	IPCEF1	Ipcef1	Conserved	8.92608	12.6846	-3.13277	2	2	2.26568e-05	0.29515
ENSG00000074755	ENSMUSG00000055670	ZZEF1	Zzef1	Alternative	11.1103	11.6149	0.121142	1	1	0.0955623	1
ENSG00000074771	ENSMUSG00000023802	NOX3	Nox3	Other	-Inf	-Inf	NaN	0	0	0.105684	1
ENSG00000074803	ENSMUSG00000027202	SLC12A1	Slc12a1	Other	0.276968	-Inf	Inf	0	0	0.0141849	1
ENSG00000074842	ENSMUSG00000019579	MYDGF	Mydgf	Other	8.53326	9.79312	-0.634145	0	0	0.67557	1
ENSG00000074855	ENSMUSG00000034863	ANO8	Ano8	Conserved	7.16154	8.45071	-0.663448	1	1	0.374215	1
ENSG00000074935	ENSMUSG00000019845	TUBE1	Tube1	Other	8.35456	7.63758	1.3427	0	0	2.28761e-05	0.297916
ENSG00000074964	ENSMUSG00000040964	ARHGEF10L	Arhgef10l	Other	1.79037	4.41019	-1.9941	0	1	0.0386529	1
ENSG00000074966	ENSMUSG00000054892	TXK	Txk	Other	8.44989	11.1992	-2.1236	0	3	1.04883e-05	0.139536
ENSG00000075035	ENSMUSG00000063430	WSCD2	Wscd2	Other	1.51771	6.93057	-4.78714	0	2	1.17419e-14	1.80954e-10
ENSG00000075043	ENSMUSG00000016346	KCNQ2	Kcnq2	Other	2.97818	4.79873	-1.19483	0	3	0.0454467	1
ENSG00000075073	ENSMUSG00000020081	TACR2	Tacr2	Other	3.52823	0.626674	3.52728	2	0	0.000224382	1
ENSG00000075089	ENSMUSG00000019948	ACTR6	Actr6	Other	8.29867	8.90981	0.0145774	1	0	0.0847604	1
ENSG00000075131	ENSMUSG00000032397	TIPIN	Tipin	Alternative	7.81268	10.0059	-1.56749	1	1	0.10529	1
ENSG00000075142	ENSMUSG00000003161	SRI	Sri	Other	9.66057	12.7523	-2.46605	1	0	2.6912e-05	0.349156
ENSG00000075151	ENSMUSG00000028760	EIF4G3	Eif4g3	Other	9.4036	12.2655	-2.23622	2	0	6.93652e-08	0.00100545
ENSG00000075188	ENSMUSG00000035351	NUP37	Nup37	Other	8.41598	9.29657	-0.254873	0	0	0.178867	1
ENSG00000075213	ENSMUSG00000028883	SEMA3A	Sema3a	Other	4.08455	2.33113	2.37915	0	0	0.00516697	1
ENSG00000075218	ENSMUSG00000022385	GTSE1	Gtse1	Other	8.4702	9.0276	0.0683261	1	0	0.406545	1
ENSG00000075223	ENSMUSG00000028780	SEMA3C	Sema3c	Other	0.811124	1.56645	-0.1296	0	0	0.0605017	1
ENSG00000075234	ENSMUSG00000035944	TTC38	Ttc38	Other	6.60468	9.65453	-2.42413	1	0	7.78077e-06	0.104441
ENSG00000075239	ENSMUSG00000032047	ACAT1	Acat1	Other	8.87568	10.5149	-1.01353	1	0	0.0126646	1
ENSG00000075240	ENSMUSG00000035900	GRAMD4	Gramd4	Conserved	9.31193	10.7516	-0.813904	4	1	0.120897	1
ENSG00000075275	ENSMUSG00000016028	CELSR1	Celsr1	Other	5.26717	10.8435	-4.95057	0	2	5.42385e-11	8.22636e-07
ENSG00000075290	ENSMUSG00000036961	WNT8B	Wnt8b	Other	4.67843	0.958404	4.34575	0	0	6.07257e-08	0.000881737
ENSG00000075292	ENSMUSG00000030016	ZNF638	Zfp638	Other	10.7252	11.7455	-0.39454	2	1	0.176437	1
ENSG00000075303	ENSMUSG00000054099	SLC25A40	Slc25a40	Other	8.56677	9.87466	-0.68217	0	0	0.65296	1
ENSG00000075336	ENSMUSG00000024645	TIMM21	Timm21	Conserved	8.08232	9.12101	-0.412972	1	1	0.532146	1
ENSG00000075340	ENSMUSG00000030000	ADD2	Add2	Other	7.2385	-1.57074	9.43497	0	2	3.96178e-09	5.87968e-05
ENSG00000075388	ENSMUSG00000050917	FGF4	Fgf4	Other	0.558706	-Inf	Inf	0	0	0.288379	1
ENSG00000075391	ENSMUSG00000070565	RASAL2	Rasal2	Other	2.5511	4.07942	-0.9026	0	0	0.0196378	1
ENSG00000075399	ENSMUSG00000001062	VPS9D1	Vps9d1	Other	7.59134	8.65933	-0.442264	0	0	0.0517217	1
ENSG00000075413	ENSMUSG00000007411	MARK3	Mark3	Other	10.0873	11.0636	-0.35065	0	1	0.3953	1
ENSG00000075415	ENSMUSG00000061904	SLC25A3	Slc25a3	Other	11.9444	13.6364	-1.06625	1	0	0.67925	1
ENSG00000075420	ENSMUSG00000039286	FNDC3B	Fndc3b	Other	8.43308	4.48804	4.57076	7	0	7.65589e-10	1.14716e-05
ENSG00000075426	ENSMUSG00000029135	FOSL2	Fosl2	Other	11.2718	13.3866	-1.48904	10	1	0.934599	1
ENSG00000075429	ENSMUSG00000040373	CACNG5	Cacng5	Other	-1.61447	-Inf	Inf	0	1	0.504894	1
ENSG00000075461	ENSMUSG00000020723	CACNG4	Cacng4	Mm-Specific	0.355495	3.46164	-2.48042	0	1	4.3331e-05	0.553337
ENSG00000075539	ENSMUSG00000070733	FRYL	Fryl	Other	11.3373	12.6261	-0.663116	1	0	0.998156	1
ENSG00000075568	ENSMUSG00000026116	TMEM131	Tmem131	Alternative	9.63082	11.8482	-1.59168	3	2	0.000260073	1
ENSG00000075618	ENSMUSG00000029581	FSCN1	Fscn1	Other	7.01613	5.05649	2.58537	0	0	0.000465544	1
ENSG00000075624	ENSMUSG00000029580	ACTB	Actb	Conserved	15.4385	16.8182	-0.753975	5	2	0.16588	1
ENSG00000075651	ENSMUSG00000027695	PLD1	Pld1	Other	4.61428	4.90186	0.338144	0	0	0.573389	1
ENSG00000075673	ENSMUSG00000022229	ATP12A	Atp12a	Other	1.59092	-Inf	Inf	4	0	0.000226163	1
ENSG00000075702	ENSMUSG00000037020	WDR62	Wdr62	Other	7.97254	7.46945	1.12881	0	0	0.00145626	1
ENSG00000075711	ENSMUSG00000022770	DLG1	Dlg1	Other	9.74624	10.6986	-0.326687	1	1	0.490708	1
ENSG00000075785	ENSMUSG00000079477	RAB7A	Rab7	Other	10.364	12.7166	-1.72691	1	1	0.000827654	1
ENSG00000075790	ENSMUSG00000020650	BCAP29	Bcap29	Other	8.67221	11.2686	-1.9707	1	1	0.00531996	1
ENSG00000075826	ENSMUSG00000051984	SEC31B	Sec31b	Other	10.3976	6.89173	4.13164	0	0	4.85926e-06	0.0658721
ENSG00000075856	ENSMUSG00000018974	SART3	Sart3	Other	10.3323	10.3371	0.620948	0	0	0.000225353	1
ENSG00000075884	ENSMUSG00000049744	ARHGAP15	Arhgap15	Alternative	10.5445	12.4853	-1.31512	3	2	0.00808696	1
ENSG00000075891	ENSMUSG00000004231	PAX2	Pax2	Other	0.666409	-1.76511	3.05724	1	0	0.704974	1
ENSG00000075914	ENSMUSG00000025785	EXOSC7	Exosc7	Other	8.65309	9.42934	-0.150529	0	0	0.693998	1
ENSG00000075945	ENSMUSG00000026585	KIFAP3	Kifap3	Other	8.89679	8.19193	1.33058	1	0	0.00058669	1
ENSG00000075975	ENSMUSG00000000439	MKRN2	Mkrn2	Other	8.80985	10.6134	-1.17779	1	0	0.0292316	1
ENSG00000076003	ENSMUSG00000026355	MCM6	Mcm6	Other	10.8331	11.0702	0.388648	0	1	0.0117159	1
ENSG00000076043	ENSMUSG00000032026	REXO2	Rexo2	Other	8.97519	10.6304	-1.02952	0	1	0.00796183	1
ENSG00000076067	ENSMUSG00000040043	RBMS2	Rbms2	Other	6.66056	9.46821	-2.18193	0	0	8.73699e-07	0.0122475
ENSG00000076108	ENSMUSG00000040054	BAZ2A	Baz2a	Other	11.583	12.6881	-0.479388	2	0	0.858003	1
ENSG00000076201	ENSMUSG00000036057	PTPN23	Ptpn23	Other	8.58798	11.1667	-1.95304	0	0	0.580562	1
ENSG00000076242	ENSMUSG00000032498	MLH1	Mlh1	Other	9.0009	9.36719	0.25944	0	0	0.0602514	1
ENSG00000076248	ENSMUSG00000029591	UNG	Ung	Other	8.06451	6.59679	2.09344	1	0	8.59682e-05	1
ENSG00000076258	ENSMUSG00000026692	FMO4	Fmo4	Other	3.61633	-3.11513	7.35719	0	0	1.39212e-06	0.0193644
ENSG00000076321	ENSMUSG00000026705	KLHL20	Klhl20	Other	8.28909	10.5967	-1.68185	0	0	0.00318141	1
ENSG00000076344	ENSMUSG00000024186	RGS11	Rgs11	Other	2.7948	9.46945	-6.04892	0	0	1.00842e-10	1.52584e-06
ENSG00000076351	ENSMUSG00000020829	SLC46A1	Slc46a1	Other	6.53831	3.62843	3.53561	0	0	2.4052e-05	0.312988
ENSG00000076356	ENSMUSG00000026640	PLXNA2	Plxna2	Hs-Specific	3.99175	5.30658	-0.689102	1	0	0.0686652	1
ENSG00000076513	ENSMUSG00000041870	ANKRD13A	Ankrd13a	Other	10.1639	12.0745	-1.28484	2	0	7.99093e-05	0.999586
ENSG00000076554	ENSMUSG00000027506	TPD52	Tpd52	Other	8.42382	10.1569	-1.1074	2	0	0.114004	1
ENSG00000076555	ENSMUSG00000042010	ACACB	Acacb	Other	7.71119	4.04487	4.29204	0	1	3.98069e-06	0.0542091
ENSG00000076604	ENSMUSG00000017386	TRAF4	Traf4	Other	9.41346	10.0685	-0.0293293	2	0	0.102258	1
ENSG00000076641	ENSMUSG00000027508	PAG1	Pag1	Other	11.9467	11.4832	1.08921	6	3	0.000261488	1
ENSG00000076650	ENSMUSG00000063808	GPATCH1	Gpatch1	Other	7.45028	8.45864	-0.38264	1	0	0.894146	1
ENSG00000076685	ENSMUSG00000025041	NT5C2	Nt5c2	Other	9.43583	9.32246	0.739092	1	2	5.87996e-06	0.0793912
ENSG00000076706	ENSMUSG00000032135	MCAM	Mcam	Other	6.41207	3.91692	3.12088	0	0	0.000635738	1
ENSG00000076716	ENSMUSG00000031119	GPC4	Gpc4	Other	-0.380783	-Inf	Inf	0	0	0.195128	1
ENSG00000076770	ENSMUSG00000036109	MBNL3	Mbnl3	Other	8.44732	9.06249	0.0105531	0	0	0.118291	1
ENSG00000076826	ENSMUSG00000044433	CAMSAP3	Camsap3	Other	2.96174	3.83703	-0.24956	0	0	0.182339	1
ENSG00000076864	ENSMUSG00000041351	RAP1GAP	Rap1gap	Other	2.79386	3.69229	-0.272714	1	0	0.0751253	1
ENSG00000076924	ENSMUSG00000019470	XAB2	Xab2	Other	9.93333	11.078	-0.518991	0	0	0.306956	1
ENSG00000076928	ENSMUSG00000040940	ARHGEF1	Arhgef1	Conserved	12.6384	14.474	-1.20984	5	2	0.254358	1
ENSG00000076944	ENSMUSG00000004626	STXBP2	Stxbp2	Other	9.774	11.4606	-1.06091	1	0	0.0176022	1
ENSG00000077009	ENSMUSG00000004939	NMRK2	Nmrk2	Other	0.147079	4.22461	-3.45181	0	0	4.11558e-05	0.526506
ENSG00000077044	ENSMUSG00000070738	DGKD	Dgkd	Conserved	9.97133	12.9105	-2.31344	3	3	1.53526e-06	0.0213079
ENSG00000077063	ENSMUSG00000000416	CTTNBP2	Cttnbp2	Other	-0.308124	-0.264655	0.582254	0	0	0.414309	1
ENSG00000077080	ENSMUSG00000029712	ACTL6B	Actl6b	Other	1.05863	3.63116	-1.94681	0	0	0.0089141	1
ENSG00000077092	ENSMUSG00000017491	RARB	Rarb	Other	3.89526	-3.11513	7.63612	0	0	0.000688864	1
ENSG00000077097	ENSMUSG00000017485	TOP2B	Top2b	Other	11.8428	13.1619	-0.693462	1	0	0.900629	1
ENSG00000077147	ENSMUSG00000025016	TM9SF3	Tm9sf3	Conserved	11.151	12.6454	-0.868695	1	1	0.180966	1
ENSG00000077150	ENSMUSG00000025225	NFKB2	Nfkb2	Conserved	11.1177	12.8154	-1.07201	2	2	0.0977274	1
ENSG00000077152	ENSMUSG00000026429	UBE2T	Ube2t	Other	8.04928	9.34155	-0.666554	0	0	0.63668	1
ENSG00000077157	ENSMUSG00000073557	PPP1R12B	Ppp1r12b	Other	8.20253	8.40029	0.427963	0	0	0.0705596	1
ENSG00000077232	ENSMUSG00000027006	DNAJC10	Dnajc10	Conserved	10.5127	11.0496	0.088858	2	1	0.119344	1
ENSG00000077235	ENSMUSG00000032777	GTF3C1	Gtf3c1	Other	10.3124	11.4314	-0.493252	1	0	0.719769	1
ENSG00000077238	ENSMUSG00000030748	IL4R	Il4ra	Conserved	10.5502	13.1031	-1.92714	3	4	0.0594056	1
ENSG00000077254	ENSMUSG00000025437	USP33	Usp33	Other	10.265	10.3461	0.544587	1	0	0.0139682	1
ENSG00000077264	ENSMUSG00000031284	PAK3	Pak3	Other	5.44882	-3.11512	9.18966	0	0	0.000121014	1
ENSG00000077274	ENSMUSG00000067276	CAPN6	Capn6	Other	-1.97841	1.82043	-3.17312	0	0	0.00670439	1
ENSG00000077279	ENSMUSG00000031285	DCX	Dcx	Other	1.76366	3.37518	-0.985798	0	0	0.00605169	1
ENSG00000077312	ENSMUSG00000061479	SNRPA	Snrpa	Other	8.80644	10.525	-1.09282	0	0	0.0887518	1
ENSG00000077348	ENSMUSG00000061286	EXOSC5	Exosc5	Other	6.91146	9.34104	-1.80386	0	0	3.75885e-05	0.482432
ENSG00000077380	ENSMUSG00000027012	DYNC1I2	Dync1i2	Other	9.40245	11.3257	-1.29752	1	0	0.00745523	1
ENSG00000077420	ENSMUSG00000026786	APBB1IP	Apbb1ip	Conserved	9.2031	12.0838	-2.25494	8	6	0.0111199	1
ENSG00000077458	ENSMUSG00000037808	FAM76B	Fam76b	Other	9.7835	11.1895	-0.780294	1	4	0.691649	1
ENSG00000077463	ENSMUSG00000034748	SIRT6	Sirt6	Other	7.28873	9.12663	-1.21218	1	0	0.00151224	1
ENSG00000077498	ENSMUSG00000004651	TYR	Tyr	Other	-0.754181	3.57857	-3.70703	0	0	0.0122032	1
ENSG00000077522	ENSMUSG00000052374	ACTN2	Actn2	Other	1.41382	7.05659	-5.01705	0	0	0.00011933	1
ENSG00000077549	ENSMUSG00000028745	CAPZB	Capzb	Conserved	10.876	13.1531	-1.65133	5	2	0.000373658	1
ENSG00000077585	ENSMUSG00000021306	GPR137B	Gpr137b	Other	6.6757	6.9078	0.393625	1	0	0.200149	1
ENSG00000077616	ENSMUSG00000043943	NAALAD2	Naalad2	Other	5.23858	3.42315	2.44115	0	0	0.000310391	1
ENSG00000077684	ENSMUSG00000025764	JADE1	Jade1	Conserved	9.61142	9.87324	0.363907	4	2	0.0183107	1
ENSG00000077713	ENSMUSG00000037636	SLC25A43	Slc25a43	Other	5.98343	4.61084	1.99831	0	1	0.00327547	1
ENSG00000077721	ENSMUSG00000016308	UBE2A	Ube2a	Other	9.56149	10.6298	-0.442548	1	0	0.299229	1
ENSG00000077782	ENSMUSG00000031565	FGFR1	Fgfr1	Other	8.00923	6.3938	2.24115	0	0	1.67854e-06	0.0232511
ENSG00000077800	ENSMUSG00000040013	FKBP6	Fkbp6	Other	3.48698	-1.6687	5.7814	0	0	5.34331e-06	0.0722844
ENSG00000077935	ENSMUSG00000022432	SMC1B	Smc1b	Other	4.36594	0.261996	4.72966	0	0	2.3802e-09	3.54389e-05
ENSG00000077942	ENSMUSG00000006369	FBLN1	Fbln1	Other	4.77376	7.28806	-1.88858	0	1	0.000100996	1
ENSG00000077943	ENSMUSG00000026768	ITGA8	Itga8	Other	0.945312	4.24387	-2.67284	0	0	0.0623908	1
ENSG00000077984	ENSMUSG00000068129	CST7	Cst7	Conserved	8.72761	10.6878	-1.3345	1	1	0.429626	1
ENSG00000078018	ENSMUSG00000015222	MAP2	Map2	Other	0.86118	4.6797	-3.1928	0	1	0.00147982	1
ENSG00000078043	ENSMUSG00000025423	PIAS2	Pias2	Other	8.96965	10.5385	-0.943167	1	2	0.0659855	1
ENSG00000078053	ENSMUSG00000021314	AMPH	Amph	Other	3.30641	-2.6589	6.59103	3	0	1.54133e-06	0.021386
ENSG00000078061	ENSMUSG00000001127	ARAF	Araf	Other	9.50342	11.71	-1.58084	0	1	0.000194047	1
ENSG00000078070	ENSMUSG00000027709	MCCC1	Mccc1	Other	8.05015	8.74642	-0.0705468	0	0	0.184738	1
ENSG00000078098	ENSMUSG00000000392	FAP	Fap	Other	0.528333	3.77554	-2.62149	0	1	0.000643175	1
ENSG00000078124	ENSMUSG00000030760	ACER3	Acer3	Other	7.65573	7.70508	0.576364	0	0	0.00103221	1
ENSG00000078140	ENSMUSG00000029203	UBE2K	Ube2k	Other	10.0206	11.3217	-0.675439	0	0	0.715666	1
ENSG00000078142	ENSMUSG00000033628	PIK3C3	Pik3c3	Other	9.853	10.5847	-0.105955	0	0	0.283146	1
ENSG00000078177	ENSMUSG00000037795	N4BP2	N4bp2	Other	10.3792	10.7248	0.280089	2	0	0.123873	1
ENSG00000078237	ENSMUSG00000038028	TIGAR	Tigar	Conserved	7.61801	9.05793	-0.814196	2	1	0.0158617	1
ENSG00000078246	ENSMUSG00000001521	TULP3	Tulp3	Other	7.08206	8.55646	-0.848676	0	1	0.014248	1
ENSG00000078269	ENSMUSG00000023805	SYNJ2	Synj2	Conserved	9.61198	9.80672	0.43098	4	8	0.00778101	1
ENSG00000078295	ENSMUSG00000021536	ADCY2	Adcy2	Other	4.17466	-Inf	Inf	0	0	8.45124e-07	0.011852
ENSG00000078304	ENSMUSG00000017843	PPP2R5C	Ppp2r5c	Conserved	12.116	12.5265	0.21518	8	2	0.203172	1
ENSG00000078328	ENSMUSG00000008658	RBFOX1	Rbfox1	Other	2.47975	-1.50927	4.61475	0	0	0.0278608	1
ENSG00000078369	ENSMUSG00000029064	GNB1	Gnb1	Other	11.6963	12.6444	-0.322419	1	2	0.122785	1
ENSG00000078399	ENSMUSG00000038227	HOXA9	Hoxa9	Other	-2.57108	-Inf	Inf	0	0	0.941149	1
ENSG00000078401	ENSMUSG00000021367	EDN1	Edn1	Other	3.19876	3.38171	0.442774	0	0	0.624766	1
ENSG00000078403	ENSMUSG00000026743	MLLT10	Mllt10	Conserved	9.10734	11.6169	-1.8838	2	5	0.00593687	1
ENSG00000078487	ENSMUSG00000037108	ZCWPW1	Zcwpw1	Other	5.52684	7.8137	-1.66113	1	0	0.069276	1
ENSG00000078549	ENSMUSG00000029778	ADCYAP1R1	Adcyap1r1	Other	2.75193	-0.252826	3.63048	0	0	0.236519	1
ENSG00000078579	ENSMUSG00000031603	FGF20	Fgf20	Other	-Inf	-Inf	NaN	0	0	0.105684	1
ENSG00000078589	ENSMUSG00000050921	P2RY10	P2ry10	Other	8.914	12.1545	-2.61473	0	1	9.43053e-05	1
ENSG00000078596	ENSMUSG00000031239	ITM2A	Itm2a	Other	10.4824	11.5473	-0.439098	1	0	0.139286	1
ENSG00000078618	ENSMUSG00000053510	NRDC	Nrd1	Other	10.5435	12.1564	-0.98718	2	1	0.118593	1
ENSG00000078668	ENSMUSG00000008892	VDAC3	Vdac3	Other	10.2889	10.5112	0.403405	1	0	0.00747742	1
ENSG00000078674	ENSMUSG00000031592	PCM1	Pcm1	Other	11.5798	11.1677	1.03787	2	0	0.000340388	1
ENSG00000078687	ENSMUSG00000025571	TNRC6C	Tnrc6c	Other	9.01093	11.5884	-1.95177	8	0	0.00529027	1
ENSG00000078699	ENSMUSG00000038533	CBFA2T2	Cbfa2t2	Other	8.876	9.22807	0.273645	2	0	0.159931	1
ENSG00000078725	ENSMUSG00000028351	BRINP1	Brinp1	Other	-0.567741	-Inf	Inf	0	0	0.734686	1
ENSG00000078747	ENSMUSG00000027598	ITCH	Itch	Other	10.4098	12.1579	-1.1224	2	0	0.609865	1
ENSG00000078795	ENSMUSG00000014503	PKD2L2	Pkd2l2	Other	3.84434	6.83299	-2.36293	0	1	8.58018e-06	0.11488
ENSG00000078804	ENSMUSG00000038375	TP53INP2	Trp53inp2	Other	7.68912	8.93082	-0.615973	0	0	0.769817	1
ENSG00000078808	ENSMUSG00000029076	SDF4	Sdf4	Conserved	10.2307	13.8128	-2.95632	3	2	3.15642e-07	0.0044878
ENSG00000078814	ENSMUSG00000074652	MYH7B	Myh7b	Other	5.57668	4.63958	1.56282	0	0	0.0021404	1
ENSG00000078898	ENSMUSG00000027481	BPIFB2	Bpifb2	Other	-0.548713	-2.93358	3.01059	0	0	0.476502	1
ENSG00000078900	ENSMUSG00000029026	TP73	Trp73	Other	3.9209	1.65368	2.89295	0	0	0.000990456	1
ENSG00000078902	ENSMUSG00000025139	TOLLIP	Tollip	Other	8.30346	10.8028	-1.87366	1	0	4.96071e-05	0.630953
ENSG00000079102	ENSMUSG00000006586	RUNX1T1	Runx1t1	Other	1.61666	4.9494	-2.70703	0	0	0.00897511	1
ENSG00000079112	ENSMUSG00000028217	CDH17	Cdh17	Other	2.35211	3.77599	-0.798157	0	3	0.000243637	1
ENSG00000079150	ENSMUSG00000002732	FKBP7	Fkbp7	Other	4.10783	4.83545	-0.101893	1	0	0.325641	1
ENSG00000079156	ENSMUSG00000042359	OSBPL6	Osbpl6	Other	4.08412	5.02959	-0.319747	1	0	0.489995	1
ENSG00000079215	ENSMUSG00000005360	SLC1A3	Slc1a3	Other	-0.226978	5.06462	-4.66588	0	0	7.79191e-05	0.975547
ENSG00000079246	ENSMUSG00000026187	XRCC5	Xrcc5	Other	12.4265	9.27872	3.77351	1	0	5.61616e-12	8.57813e-08
ENSG00000079257	ENSMUSG00000047557	LXN	Lxn	Other	5.9666	8.68581	-2.09348	0	0	0.00360285	1
ENSG00000079263	ENSMUSG00000026222	SP140	Sp100	Other	9.98872	13.616	-3.00153	2	1	8.79376e-06	0.117687
ENSG00000079277	ENSMUSG00000028708	MKNK1	Mknk1	Other	8.98966	9.81743	-0.202049	3	1	0.639055	1
ENSG00000079308	ENSMUSG00000055322	TNS1	Tns1	Other	3.35049	11.1178	-7.14162	0	3	1.56683e-06	0.0217366
ENSG00000079313	ENSMUSG00000047417	REXO1	Rexo1	Conserved	9.63826	10.9879	-0.723957	1	1	0.20464	1
ENSG00000079332	ENSMUSG00000020088	SAR1A	Sar1a	Other	10.8149	11.7046	-0.264019	4	0	0.132213	1
ENSG00000079335	ENSMUSG00000033502	CDC14A	Cdc14a	Alternative	9.26578	9.70613	0.185371	5	2	0.368997	1
ENSG00000079337	ENSMUSG00000022469	RAPGEF3	Rapgef3	Other	4.14927	6.36239	-1.5874	0	0	0.00986351	1
ENSG00000079387	ENSMUSG00000033075	SENP1	Senp1	Other	9.27362	11.1028	-1.20349	0	0	0.0402282	1
ENSG00000079393	ENSMUSG00000021768	DUSP13	Dusp13	Other	-0.497393	-2.53136	2.65969	0	1	0.611547	1
ENSG00000079432	ENSMUSG00000005442	CIC	Cic	Conserved	10.2119	12.0295	-1.19188	3	2	0.0327131	1
ENSG00000079435	ENSMUSG00000003123	LIPE	Lipe	Other	6.66244	8.52406	-1.23589	0	0	0.000355305	1
ENSG00000079459	ENSMUSG00000021273	FDFT1	Fdft1	Other	10.7642	10.0359	1.35397	1	0	5.01088e-05	0.637034
ENSG00000079462	ENSMUSG00000005447	PAFAH1B3	Pafah1b3	Other	6.58101	7.97148	-0.76475	0	0	0.148372	1
ENSG00000079482	ENSMUSG00000031214	OPHN1	Ophn1	Other	7.02645	1.85699	5.79519	1	1	1.33425e-10	2.01618e-06
ENSG00000079557	ENSMUSG00000029369	AFM	Afm	Other	-Inf	-2.75339	-Inf	0	0	0.0310608	1
ENSG00000079616	ENSMUSG00000030677	KIF22	Kif22	Other	10.2168	10.085	0.757513	2	0	0.000916779	1
ENSG00000079689	ENSMUSG00000021337	SCGN	Scgn	Other	-3.99892	1.17129	-4.54449	0	0	0.0349056	1
ENSG00000079691	ENSMUSG00000021338	CARMIL1	Carmil1	Other	6.28566	6.66869	0.242694	1	2	0.183006	1
ENSG00000079739	ENSMUSG00000025791	PGM1	Pgm1	Other	8.59418	10.1609	-0.940976	0	1	0.0676021	1
ENSG00000079785	ENSMUSG00000037149	DDX1	Ddx1	Other	10.1627	10.884	-0.0955174	1	1	0.0961157	1
ENSG00000079805	ENSMUSG00000033335	DNM2	Dnm2	Other	11.3877	12.5014	-0.487977	6	0	0.487289	1
ENSG00000079819	ENSMUSG00000019978	EPB41L2	Epb41l2	Other	8.77369	10.861	-1.4616	1	0	0.00623951	1
ENSG00000079841	ENSMUSG00000041670	RIMS1	Rims1	Other	1.5705	0.650036	1.54619	0	0	0.611325	1
ENSG00000079931	ENSMUSG00000020000	MOXD1	Moxd1	Other	0.382564	3.0866	-2.07831	0	2	0.465478	1
ENSG00000079950	ENSMUSG00000019998	STX7	Stx7	Other	8.19837	9.46724	-0.643142	0	0	0.926739	1
ENSG00000079999	ENSMUSG00000003308	KEAP1	Keap1	Other	9.2264	10.2375	-0.385366	1	0	0.716952	1
ENSG00000080031	ENSMUSG00000035429	PTPRH	Ptprh	Other	2.50278	1.17725	1.95126	0	0	0.180233	1
ENSG00000080166	ENSMUSG00000022129	DCT	Dct	Other	0.559244	4.20495	-3.01998	0	0	1.1385e-05	0.151124
ENSG00000080189	ENSMUSG00000017664	SLC35C2	Slc35c2	Other	8.91955	9.00126	0.544014	0	0	0.00247874	1
ENSG00000080200	ENSMUSG00000022723	CRYBG3	Crybg3	Other	9.01075	9.64333	-0.00685866	1	1	0.389764	1
ENSG00000080224	ENSMUSG00000055540	EPHA6	Epha6	Other	-0.15194	-3.67977	4.15355	0	0	0.72281	1
ENSG00000080293	ENSMUSG00000026387	SCTR	Sctr	Mm-Specific	1.05126	0.244434	1.43255	0	1	0.451575	1
ENSG00000080298	ENSMUSG00000040929	RFX3	Rfx3	Other	8.23256	9.76019	-0.901917	4	1	0.155317	1
ENSG00000080345	ENSMUSG00000036202	RIF1	Rif1	Other	11.4743	11.4334	0.666602	1	0	0.000569477	1
ENSG00000080371	ENSMUSG00000020132	RAB21	Rab21	Other	10.3397	12.0182	-1.05272	1	0	0.0117272	1
ENSG00000080493	ENSMUSG00000060961	SLC4A4	Slc4a4	Other	2.94245	4.19793	-0.629761	0	0	0.00312754	1
ENSG00000080503	ENSMUSG00000024921	SMARCA2	Smarca2	Conserved	11.3557	11.808	0.173401	5	5	0.0235186	1
ENSG00000080511	ENSMUSG00000053773	RDH8	Rdh8	Other	0.825369	-Inf	Inf	0	0	0.0133311	1
ENSG00000080546	ENSMUSG00000038332	SESN1	Sesn1	Other	8.38209	11.0575	-2.0497	2	0	0.00518202	1
ENSG00000080561	ENSMUSG00000000266	MID2	Mid2	Other	6.97479	6.15726	1.44326	0	0	0.0119181	1
ENSG00000080573	ENSMUSG00000004098	COL5A3	Col5a3	Other	5.28605	-1.3922	7.30397	0	1	0.00830836	1
ENSG00000080608	ENSMUSG00000041360	PUM3	Pum3	Other	9.50961	10.3095	-0.17414	1	0	0.939412	1
ENSG00000080618	ENSMUSG00000021999	CPB2	Cpb2	Other	0.681283	0.283158	1.02385	0	0	0.90022	1
ENSG00000080644	ENSMUSG00000032303	CHRNA3	Chrna3	Other	1.62105	1.72528	0.521492	0	0	0.932547	1
ENSG00000080709	ENSMUSG00000054477	KCNN2	Kcnn2	Other	2.06929	1.2089	1.48611	0	0	0.954025	1
ENSG00000080802	ENSMUSG00000038784	CNOT4	Cnot4	Other	8.37208	10.615	-1.61719	0	0	0.00296498	1
ENSG00000080815	ENSMUSG00000019969	PSEN1	Psen1	Other	9.66754	10.8518	-0.558561	1	0	0.953429	1
ENSG00000080822	ENSMUSG00000022744	CLDND1	Cldnd1	Other	12.2236	9.98398	2.86535	0	1	4.00498e-10	6.01909e-06
ENSG00000080823	ENSMUSG00000056458	MOK	Mok	Other	5.28762	2.91074	3.0026	0	0	3.64427e-06	0.049697
ENSG00000080824	ENSMUSG00000021270	HSP90AA1	Hsp90aa1	Other	14.2857	13.588	1.32341	1	1	1.90522e-08	0.000279515
ENSG00000080839	ENSMUSG00000027641	RBL1	Rbl1	Conserved	9.7735	11.04	-0.640789	2	4	0.928075	1
ENSG00000080845	ENSMUSG00000061689	DLGAP4	Dlgap4	Other	8.04783	10.6281	-1.95453	2	1	1.21145e-06	0.0168974
ENSG00000080854	ENSMUSG00000034275	IGSF9B	Igsf9b	Other	8.42666	5.61421	3.43817	3	0	1.63203e-05	0.214629
ENSG00000080986	ENSMUSG00000024056	NDC80	Ndc80	Other	9.1194	9.65504	0.0900791	0	2	0.553626	1
ENSG00000081014	ENSMUSG00000001998	AP4E1	Ap4e1	Other	8.9784	9.78002	-0.175901	3	0	0.324701	1
ENSG00000081019	ENSMUSG00000044098	RSBN1	Rsbn1	Conserved	9.39153	10.491	-0.473721	1	1	0.875693	1
ENSG00000081026	ENSMUSG00000052539	MAGI3	Magi3	Other	7.01538	8.79714	-1.15603	0	0	0.0450443	1
ENSG00000081051	ENSMUSG00000054932	AFP	Afp	Other	-0.788788	6.54901	-6.71207	0	0	4.44938e-07	0.00629543
ENSG00000081052	ENSMUSG00000067158	COL4A4	Col4a4	Other	2.65634	4.37755	-1.09549	0	0	0.0111242	1
ENSG00000081059	ENSMUSG00000000782	TCF7	Tcf7	Conserved	11.1885	13.9069	-2.09266	3	5	0.00196873	1
ENSG00000081087	ENSMUSG00000038280	OSTM1	Ostm1	Other	8.71765	10.5668	-1.22346	2	0	0.000640859	1
ENSG00000081138	ENSMUSG00000026312	CDH7	Cdh7	Other	2.79569	-1.65473	5.07615	0	0	4.95365e-07	0.007001
ENSG00000081148	ENSMUSG00000035270	IMPG2	Impg2	Other	4.92716	6.643	-1.09011	0	0	0.0283523	1
ENSG00000081154	ENSMUSG00000071533	PCNP	Pcnp	Conserved	10.7143	11.7187	-0.378742	1	1	0.478978	1
ENSG00000081177	ENSMUSG00000032705	EXD2	Exd2	Other	6.52609	9.69996	-2.54815	0	0	3.16078e-10	4.75982e-06
ENSG00000081181	ENSMUSG00000021125	ARG2	Arg2	Other	5.00962	3.50461	2.13074	0	0	0.00810141	1
ENSG00000081189	ENSMUSG00000005583	MEF2C	Mef2c	Other	3.70817	1.49006	2.84383	0	0	0.366325	1
ENSG00000081237	ENSMUSG00000026395	PTPRC	Ptprc	Conserved	14.1982	16.4732	-1.6493	17	13	0.00820525	1
ENSG00000081248	ENSMUSG00000026407	CACNA1S	Cacna1s	Other	0.23445	3.76392	-2.90375	0	1	0.00321648	1
ENSG00000081277	ENSMUSG00000026413	PKP1	Pkp1	Other	0.137593	0.146906	0.616409	0	0	0.11087	1
ENSG00000081307	ENSMUSG00000032557	UBA5	Uba5	Other	9.50212	9.89445	0.233396	0	0	0.00156174	1
ENSG00000081320	ENSMUSG00000026094	STK17B	Stk17b	Conserved	13.0351	14.0341	-0.373291	5	3	0.353986	1
ENSG00000081386	ENSMUSG00000055102	ZNF510	Zfp819	Other	7.94555	-1.22089	9.79216	0	0	7.66947e-19	1.18555e-14
ENSG00000081479	ENSMUSG00000027070	LRP2	Lrp2	Other	3.88107	3.35683	1.14996	0	1	0.866309	1
ENSG00000081692	ENSMUSG00000036819	JMJD4	Jmjd4	Other	7.92662	8.61555	-0.0632091	1	0	0.933445	1
ENSG00000081721	ENSMUSG00000026659	DUSP12	Dusp12	Other	7.66969	7.33428	0.961137	2	0	0.00184026	1
ENSG00000081760	ENSMUSG00000029482	AACS	Aacs	Other	8.68208	9.9397	-0.631901	1	1	0.272053	1
ENSG00000081791	ENSMUSG00000024442	DELE1	Dele1	Other	8.81889	9.11146	0.33316	1	0	2.72978e-05	0.354025
ENSG00000081800	ENSMUSG00000029700	SLC13A1	Slc13a1	Other	0.139821	5.85997	-5.09442	0	0	2.12931e-06	0.0293824
ENSG00000081803	ENSMUSG00000017978	CADPS2	Cadps2	Other	-0.118029	-3.67977	4.18746	0	0	0.890371	1
ENSG00000081853	ENSMUSG00000103332	PCDHGA2	Pcdhga2	Other	-1.22343	0.363539	-0.961245	0	0	0.113409	1
ENSG00000081870	ENSMUSG00000063172	HSPB11	Hspb11	Other	8.31222	9.12104	-0.183092	1	0	0.08313	1
ENSG00000081913	ENSMUSG00000044340	PHLPP1	Phlpp1	Alternative	7.52265	11.0788	-2.93044	2	4	3.3328e-07	0.00473291
ENSG00000081923	ENSMUSG00000039529	ATP8B1	Atp8b1	Other	5.20428	0.0187727	5.81123	0	0	6.33376e-08	0.000918966
ENSG00000081985	ENSMUSG00000018341	IL12RB2	Il12rb2	Conserved	11.7889	14.1528	-1.73824	9	4	0.160816	1
ENSG00000082014	ENSMUSG00000028949	SMARCD3	Smarcd3	Other	5.48819	5.86906	0.244846	0	0	0.913101	1
ENSG00000082068	ENSMUSG00000039828	WDR70	Wdr70	Conserved	8.39249	9.17809	-0.159875	2	1	0.997423	1
ENSG00000082074	ENSMUSG00000022148	FYB1	Fyb	Conserved	11.5311	13.9501	-1.79322	7	4	0.00130778	1
ENSG00000082126	ENSMUSG00000079550	MPP4	Mpp4	Other	3.21744	5.213	-1.36984	0	0	0.157302	1
ENSG00000082146	ENSMUSG00000026027	STRADB	Stradb	Other	7.31922	8.109	-0.164056	0	0	0.789427	1
ENSG00000082153	ENSMUSG00000051223	BZW1	Bzw1	Conserved	12.4558	13.0274	0.0540827	1	1	0.0698512	1
ENSG00000082175	ENSMUSG00000031870	PGR	Pgr	Other	0.443228	0.0865007	0.98245	0	0	0.169168	1
ENSG00000082212	ENSMUSG00000024556	ME2	Me2	Other	10.2662	10.8525	0.0394552	1	2	0.190556	1
ENSG00000082213	ENSMUSG00000022195	C5orf22	6030458C11Rik	Other	8.38063	9.942	-0.935644	0	0	0.0765963	1
ENSG00000082258	ENSMUSG00000026349	CCNT2	Ccnt2	Other	10.116	11.6529	-0.911193	2	1	0.13342	1
ENSG00000082269	ENSMUSG00000026153	FAM135A	Fam135a	Other	7.45641	4.16423	3.9179	0	0	2.35961e-06	0.032506
ENSG00000082293	ENSMUSG00000026141	COL19A1	Col19a1	Other	2.89145	1.02177	2.4954	0	0	0.00114445	1
ENSG00000082397	ENSMUSG00000024044	EPB41L3	Epb41l3	Other	6.19505	6.82094	-0.00017583	0	0	0.373426	1
ENSG00000082438	ENSMUSG00000034903	COBLL1	Cobll1	Mm-Specific	2.91597	9.81727	-6.27557	0	5	9.10127e-06	0.121693
ENSG00000082458	ENSMUSG00000000881	DLG3	Dlg3	Other	8.7039	7.27963	2.04999	0	0	2.90558e-10	4.37784e-06
ENSG00000082482	ENSMUSG00000037624	KCNK2	Kcnk2	Other	0.845074	1.54488	-0.0740836	0	0	0.0176652	1
ENSG00000082497	ENSMUSG00000016262	SERTAD4	Sertad4	Other	0.93957	0.667766	0.897526	0	0	0.109925	1
ENSG00000082512	ENSMUSG00000026637	TRAF5	Traf5	Other	9.99776	9.54468	1.0788	2	1	6.82314e-07	0.00959947
ENSG00000082515	ENSMUSG00000020514	MRPL22	Mrpl22	Other	7.84393	8.50549	-0.0358364	0	0	0.195432	1
ENSG00000082516	ENSMUSG00000037275	GEMIN5	Gemin5	Other	8.96985	9.97683	-0.381257	1	0	0.595601	1
ENSG00000082556	ENSMUSG00000025905	OPRK1	Oprk1	Other	1.54206	1.13049	1.03729	0	0	0.41694	1
ENSG00000082641	ENSMUSG00000038615	NFE2L1	Nfe2l1	Other	9.934	10.884	-0.324248	1	0	0.206084	1
ENSG00000082684	ENSMUSG00000052133	SEMA5B	Sema5b	Other	3.6332	-2.46708	6.726	2	0	0.000122267	1
ENSG00000082701	ENSMUSG00000022812	GSK3B	Gsk3b	Other	9.62014	11.6262	-1.38034	6	1	0.00309551	1
ENSG00000082781	ENSMUSG00000022817	ITGB5	Itgb5	Other	2.90334	7.06178	-3.53272	0	0	3.30675e-05	0.426078
ENSG00000082805	ENSMUSG00000030172	ERC1	Erc1	Other	8.93494	10.1535	-0.592843	2	2	0.314013	1
ENSG00000082898	ENSMUSG00000020290	XPO1	Xpo1	Other	11.7899	12.244	0.171635	3	0	0.0363708	1
ENSG00000082996	ENSMUSG00000036503	RNF13	Rnf13	Other	9.02829	10.5332	-0.879236	0	0	0.368711	1
ENSG00000083067	ENSMUSG00000052387	TRPM3	Trpm3	Other	3.32449	-Inf	Inf	0	0	2.08092e-06	0.0287229
ENSG00000083093	ENSMUSG00000044702	PALB2	Palb2	Other	8.24658	8.27353	0.598768	0	0	0.00529269	1
ENSG00000083097	ENSMUSG00000034973	DOP1A	Dop1a	Conserved	8.82186	10.4578	-1.01023	1	1	0.122675	1
ENSG00000083099	ENSMUSG00000045854	LYRM2	Lyrm2	Other	8.53375	7.91399	1.24548	1	0	1.10444e-05	0.146724
ENSG00000083123	ENSMUSG00000032263	BCKDHB	Bckdhb	Other	6.98345	6.68758	0.921595	0	0	0.118417	1
ENSG00000083168	ENSMUSG00000031540	KAT6A	Kat6a	Conserved	11.755	12.3704	0.0103855	2	1	0.180453	1
ENSG00000083290	ENSMUSG00000004798	ULK2	Ulk2	Conserved	7.46258	10.4677	-2.3794	2	1	2.17303e-06	0.0299704
ENSG00000083307	ENSMUSG00000022286	GRHL2	Grhl2	Alternative	2.53025	5.16016	-2.00419	1	1	2.41791e-05	0.314595
ENSG00000083312	ENSMUSG00000009470	TNPO1	Tnpo1	Conserved	11.5781	12.4514	-0.247501	1	3	0.454773	1
ENSG00000083444	ENSMUSG00000019055	PLOD1	Plod1	Other	6.73223	8.07483	-0.716885	1	0	0.113278	1
ENSG00000083457	ENSMUSG00000005947	ITGAE	Itgae	Conserved	8.9256	5.1998	4.35152	8	3	8.37043e-09	0.000123665
ENSG00000083520	ENSMUSG00000033166	DIS3	Dis3	Other	10.6139	10.1123	1.12732	0	0	9.34871e-06	0.124917
ENSG00000083535	ENSMUSG00000022064	PIBF1	Pibf1	Other	8.40647	8.59157	0.440624	1	0	0.0653459	1
ENSG00000083544	ENSMUSG00000022019	TDRD3	Tdrd3	Other	8.22052	8.73265	0.113592	2	0	0.119093	1
ENSG00000083635	ENSMUSG00000022009	NUFIP1	Nufip1	Other	7.04982	9.52874	-1.8532	0	0	2.36445e-05	0.307804
ENSG00000083642	ENSMUSG00000034021	PDS5B	Pds5b	Other	9.93457	11.2544	-0.694097	1	0	0.824306	1
ENSG00000083720	ENSMUSG00000022186	OXCT1	Oxct1	Other	9.7977	11.3654	-0.941945	1	0	0.272678	1
ENSG00000083750	ENSMUSG00000041658	RRAGB	Rragb	Other	6.4947	6.74998	0.370446	0	0	0.135895	1
ENSG00000083782	ENSMUSG00000019936	EPYC	Epyc	Other	-2.38392	-Inf	Inf	0	0	0.195109	1
ENSG00000083799	ENSMUSG00000036712	CYLD	Cyld	Conserved	12.8674	12.6067	0.886358	1	1	4.01419e-05	0.514137
ENSG00000083807	ENSMUSG00000030382	SLC27A5	Slc27a5	Hs-Specific	6.72432	5.03591	2.31413	1	0	0.000252264	1
ENSG00000083838	ENSMUSG00000033961	ZNF446	Zfp446	Other	6.43955	7.96143	-0.896161	0	0	0.0100985	1
ENSG00000083845	ENSMUSG00000012848	RPS5	Rps5	Other	12.5065	15.0914	-1.95919	0	0	0.0139332	1
ENSG00000083857	ENSMUSG00000070047	FAT1	Fat1	Other	3.07454	3.15039	0.549873	0	0	0.692083	1
ENSG00000083896	ENSMUSG00000035851	YTHDC1	Ythdc1	Other	11.2848	12.0647	-0.154172	1	0	0.380983	1
ENSG00000083937	ENSMUSG00000004843	CHMP2B	Chmp2b	Other	9.03206	9.76206	-0.104281	0	0	0.0636636	1
ENSG00000084070	ENSMUSG00000032870	SMAP2	Smap2	Alternative	11.5676	13.0165	-0.823232	4	2	0.433667	1
ENSG00000084072	ENSMUSG00000028651	PPIE	Ppie	Other	9.02887	8.54614	1.10844	1	1	0.000100511	1
ENSG00000084073	ENSMUSG00000043207	ZMPSTE24	Zmpste24	Other	9.88965	10.8115	-0.296101	1	0	0.819819	1
ENSG00000084090	ENSMUSG00000027367	STARD7	Stard7	Other	10.8849	10.4424	1.06819	1	3	2.92322e-05	0.378323
ENSG00000084092	ENSMUSG00000036285	NOA1	Noa1	Other	8.2811	9.26323	-0.35641	0	0	0.914428	1
ENSG00000084093	ENSMUSG00000029249	REST	Rest	Other	10.2071	10.8673	-0.0344987	1	5	0.0591501	1
ENSG00000084110	ENSMUSG00000020017	HAL	Hal	Other	3.87453	4.24696	0.253296	0	0	0.871304	1
ENSG00000084112	ENSMUSG00000042121	SSH1	Ssh1	Other	9.48405	10.1904	-0.0806282	3	0	0.388114	1
ENSG00000084234	ENSMUSG00000031996	APLP2	Aplp2	Alternative	9.13773	11.7971	-2.0337	2	1	2.51871e-05	0.327382
ENSG00000084444	ENSMUSG00000030207	FAM234B	Fam234b	Other	6.2953	8.83995	-1.91893	0	2	0.000385969	1
ENSG00000084623	ENSMUSG00000028798	EIF3I	Eif3i	Other	10.6825	12.0515	-0.743282	0	0	0.93264	1
ENSG00000084628	ENSMUSG00000078532	NKAIN1	Nkain1	Other	0.174938	0.917259	-0.116599	0	0	0.139073	1
ENSG00000084636	ENSMUSG00000040690	COL16A1	Col16a1	Conserved	3.33735	3.34132	0.621755	2	1	0.386736	1
ENSG00000084652	ENSMUSG00000053841	TXLNA	Txlna	Other	10.5088	11.4071	-0.272585	2	0	0.359455	1
ENSG00000084674	ENSMUSG00000020609	APOB	Apob	Other	-0.522409	-Inf	Inf	0	0	0.268776	1
ENSG00000084676	ENSMUSG00000020647	NCOA1	Ncoa1	Other	9.56506	10.3577	-0.166959	1	1	0.177875	1
ENSG00000084693	ENSMUSG00000029165	AGBL5	Agbl5	Other	7.6311	8.26173	-0.00490896	1	0	0.209254	1
ENSG00000084710	ENSMUSG00000020658	EFR3B	Efr3b	Other	4.68349	5.85732	-0.548107	0	0	0.0251228	1
ENSG00000084731	ENSMUSG00000020668	KIF3C	Kif3c	Other	5.33561	9.16071	-3.19938	1	3	1.70424e-06	0.023602
ENSG00000084733	ENSMUSG00000020671	RAB10	Rab10	Other	10.096	12.6731	-1.95136	1	2	9.83126e-05	1
ENSG00000084734	ENSMUSG00000059434	GCKR	Gckr	Other	1.66936	3.1668	-0.871716	0	0	0.35539	1
ENSG00000084754	ENSMUSG00000025745	HADHA	Hadha	Other	10.6108	11.06	0.176554	0	0	0.00901506	1
ENSG00000084764	ENSMUSG00000029166	MAPRE3	Mapre3	Other	4.5766	8.47854	-3.27622	0	0	4.73047e-08	0.000688615
ENSG00000084774	ENSMUSG00000013629	CAD	Cad	Other	9.81895	10.1978	0.246834	1	0	0.0443593	1
ENSG00000085117	ENSMUSG00000027215	CD82	Cd82	Conserved	11.0467	12.0068	-0.334412	3	8	0.735315	1
ENSG00000085185	ENSMUSG00000036959	BCORL1	Bcorl1	Other	6.10577	8.52984	-1.79835	1	0	2.071e-05	0.270473
ENSG00000085224	ENSMUSG00000031229	ATRX	Atrx	Other	10.8805	13.5179	-2.0117	0	0	0.0335034	1
ENSG00000085265	ENSMUSG00000026835	FCN1	Fcnb	Other	3.06032	-Inf	Inf	0	0	1.13148e-05	0.15025
ENSG00000085274	ENSMUSG00000037730	MYNN	Mynn	Conserved	8.6095	9.71578	-0.480555	2	1	0.826655	1
ENSG00000085276	ENSMUSG00000027684	MECOM	Mecom	Other	2.95199	8.12282	-4.5451	0	0	0.0156958	1
ENSG00000085365	ENSMUSG00000021687	SCAMP1	Scamp1	Other	8.37729	6.64572	2.35729	1	0	4.83289e-09	7.16572e-05
ENSG00000085377	ENSMUSG00000019849	PREP	Prep	Conserved	9.0274	9.84028	-0.187166	6	3	0.444964	1
ENSG00000085382	ENSMUSG00000038822	HACE1	Hace1	Other	8.46852	9.60809	-0.513848	3	0	0.48234	1
ENSG00000085415	ENSMUSG00000079614	SEH1L	Seh1l	Conserved	9.53082	10.8917	-0.735191	2	1	0.0626085	1
ENSG00000085433	ENSMUSG00000040389	WDR47	Wdr47	Other	7.8279	8.61102	-0.157395	1	0	0.589833	1
ENSG00000085449	ENSMUSG00000073643	WDFY1	Wdfy1	Conserved	10.3858	10.8282	0.183345	4	4	0.0326914	1
ENSG00000085465	ENSMUSG00000074340	OVGP1	Ovgp1	Other	7.19233	7.14922	0.668829	1	1	0.593471	1
ENSG00000085491	ENSMUSG00000040322	SLC25A24	Slc25a24	Other	8.76892	11.2008	-1.80619	3	5	0.11916	1
ENSG00000085552	ENSMUSG00000037995	IGSF9	Igsf9	Other	2.18066	5.11126	-2.30488	0	0	0.0677315	1
ENSG00000085662	ENSMUSG00000001642	AKR1B1	Akr1b3	Other	9.149	11.3814	-1.6067	1	2	0.00933621	1
ENSG00000085719	ENSMUSG00000028228	CPNE3	Cpne3	Other	9.72774	11.0212	-0.667702	0	0	0.913448	1
ENSG00000085721	ENSMUSG00000022682	RRN3	Rrn3	Other	10.1362	10.4307	0.331175	0	0	0.0268272	1
ENSG00000085733	ENSMUSG00000031078	CTTN	Cttn	Conserved	5.90548	4.04192	2.48929	2	2	0.208466	1
ENSG00000085741	ENSMUSG00000015957	WNT11	Wnt11	Other	0.940349	0.804173	0.761898	1	0	0.391391	1
ENSG00000085760	ENSMUSG00000020459	MTIF2	Mtif2	Other	8.53433	9.67054	-0.510482	0	0	0.938856	1
ENSG00000085788	ENSMUSG00000061313	DDHD2	Ddhd2	Other	9.61321	10.1319	0.106999	1	0	0.0809977	1
ENSG00000085831	ENSMUSG00000028555	TTC39A	Ttc39a	Other	3.63628	2.63112	1.63089	0	0	0.143667	1
ENSG00000085832	ENSMUSG00000028552	EPS15	Eps15	Conserved	10.6008	11.6148	-0.388289	1	1	0.285509	1
ENSG00000085840	ENSMUSG00000028587	ORC1	Orc1	Conserved	8.5701	7.78494	1.41088	1	1	0.00466686	1
ENSG00000085871	ENSMUSG00000074604	MGST2	Mgst2	Other	5.6736	11.3148	-5.01552	0	0	1.21238e-12	1.85785e-08
ENSG00000085872	ENSMUSG00000052488	CHERP	Cherp	Other	9.19265	11.4182	-1.5998	1	0	0.0095615	1
ENSG00000085978	ENSMUSG00000026289	ATG16L1	Atg16l1	Other	9.87262	10.6688	-0.170489	3	1	0.254473	1
ENSG00000085982	ENSMUSG00000005501	USP40	Usp40	Other	7.60724	9.77854	-1.54557	0	0	0.0165765	1
ENSG00000085998	ENSMUSG00000028700	POMGNT1	Pomgnt1	Other	8.49187	8.28218	0.835409	0	1	2.0535e-06	0.0283548
ENSG00000085999	ENSMUSG00000028702	RAD54L	Rad54l	Other	7.3256	8.30699	-0.355662	1	0	0.21256	1
ENSG00000086015	ENSMUSG00000003810	MAST2	Mast2	Other	7.68248	9.78971	-1.48151	0	0	0.000775712	1
ENSG00000086061	ENSMUSG00000028410	DNAJA1	Dnaja1	Other	11.9226	12.6196	-0.0712867	1	1	0.00136524	1
ENSG00000086062	ENSMUSG00000028413	B4GALT1	B4galt1	Conserved	10.0486	12.0203	-1.34595	4	7	0.00779176	1
ENSG00000086065	ENSMUSG00000028419	CHMP5	Chmp5	Other	9.35722	10.6307	-0.647723	1	0	0.884428	1
ENSG00000086102	ENSMUSG00000028423	NFX1	Nfx1	Conserved	9.72337	11.42	-1.07095	1	1	0.0215202	1
ENSG00000086159	ENSMUSG00000043144	AQP6	Aqp6	Other	1.44043	-Inf	Inf	0	0	2.52263e-05	0.327841
ENSG00000086189	ENSMUSG00000021692	DIMT1	Dimt1	Other	10.0304	8.76902	1.88712	0	0	1.74762e-09	2.60711e-05
ENSG00000086200	ENSMUSG00000042590	IPO11	Ipo11	Other	8.61791	9.84348	-0.599839	0	1	0.256428	1
ENSG00000086205	ENSMUSG00000001773	FOLH1	Folh1	Other	1.67429	-Inf	Inf	0	0	0.000146118	1
ENSG00000086232	ENSMUSG00000029613	EIF2AK1	Eif2ak1	Other	10.1438	10.959	-0.189478	1	0	0.200833	1
ENSG00000086288	ENSMUSG00000041138	NME8	Nme8	Other	-0.290963	-Inf	Inf	0	0	0.615607	1
ENSG00000086300	ENSMUSG00000038301	SNX10	Snx10	Other	9.17887	9.30481	0.499782	1	0	0.276334	1
ENSG00000086475	ENSMUSG00000026662	SEPHS1	Sephs1	Other	9.53139	10.0487	0.108384	1	0	0.123354	1
ENSG00000086504	ENSMUSG00000024181	MRPL28	Mrpl28	Other	8.88422	8.85222	0.657723	1	0	0.0109215	1
ENSG00000086544	ENSMUSG00000003752	ITPKC	Itpkc	Other	7.31224	8.55361	-0.61565	0	1	0.501061	1
ENSG00000086570	ENSMUSG00000055333	FAT2	Fat2	Other	2.55131	-1.08935	4.26639	0	0	0.000440568	1
ENSG00000086589	ENSMUSG00000024604	RBM22	Rbm22	Other	9.74541	11.0925	-0.721416	2	0	0.3505	1
ENSG00000086598	ENSMUSG00000029390	TMED2	Tmed2	Conserved	10.9761	12.2957	-0.693912	1	1	0.893055	1
ENSG00000086619	ENSMUSG00000057069	ERO1B	Ero1lb	Other	8.00203	9.08446	-0.456707	1	0	0.218575	1
ENSG00000086666	ENSMUSG00000030629	ZFAND6	Zfand6	Other	9.72577	12.0407	-1.6892	1	3	0.00964073	1
ENSG00000086696	ENSMUSG00000031844	HSD17B2	Hsd17b2	Other	4.96077	-Inf	Inf	0	1	4.24261e-09	6.29434e-05
ENSG00000086712	ENSMUSG00000038344	TXLNG	Txlng	Other	9.00269	10.9311	-1.30264	0	0	0.107099	1
ENSG00000086717	ENSMUSG00000062168	PPEF1	Ppef1	Other	1.03008	2.68139	-1.02559	0	0	0.056798	1
ENSG00000086730	ENSMUSG00000040751	LAT2	Lat2	Other	6.28323	4.5284	2.38055	2	0	0.000348348	1
ENSG00000086758	ENSMUSG00000025261	HUWE1	Huwe1	Other	12.5632	14.3173	-1.12837	2	0	0.897103	1
ENSG00000086827	ENSMUSG00000032264	ZW10	Zw10	Other	8.27804	9.66668	-0.76291	1	0	0.128531	1
ENSG00000086967	ENSMUSG00000038670	MYBPC2	Mybpc2	Other	2.61984	-1.20006	4.44562	0	0	0.0253325	1
ENSG00000086991	ENSMUSG00000030562	NOX4	Nox4	Other	3.06496	5.09797	-1.40729	0	0	9.67862e-05	1
ENSG00000087008	ENSMUSG00000029098	ACOX3	Acox3	Other	7.84833	10.0729	-1.59889	2	0	0.0016651	1
ENSG00000087053	ENSMUSG00000031918	MTMR2	Mtmr2	Other	8.80983	9.81229	-0.376734	0	0	0.368332	1
ENSG00000087074	ENSMUSG00000040435	PPP1R15A	Ppp1r15a	Other	11.6237	10.8271	1.42237	2	0	0.183668	1
ENSG00000087076	ENSMUSG00000030825	HSD17B14	Hsd17b14	Other	2.36043	3.43574	-0.449588	0	0	0.0225909	1
ENSG00000087077	ENSMUSG00000023348	TRIP6	Trip6	Other	6.87861	6.67445	0.829877	0	0	0.005285	1
ENSG00000087085	ENSMUSG00000023328	ACHE	Ache	Other	1.70453	2.0733	0.256956	0	0	0.660212	1
ENSG00000087087	ENSMUSG00000037364	SRRT	Srrt	Other	10.7685	11.8426	-0.448396	1	0	0.829525	1
ENSG00000087088	ENSMUSG00000003873	BAX	Bax	Other	9.91974	10.2877	0.257733	0	0	0.105279	1
ENSG00000087095	ENSMUSG00000017376	NLK	Nlk	Other	7.88034	11.4035	-2.89745	0	1	5.80902e-05	0.734492
ENSG00000087111	ENSMUSG00000041958	PIGS	Pigs	Other	9.3613	10.9107	-0.923681	0	0	0.0268262	1
ENSG00000087116	ENSMUSG00000036545	ADAMTS2	Adamts2	Other	2.28034	3.43972	-0.533658	0	0	0.000215739	1
ENSG00000087128	ENSMUSG00000054537	TMPRSS11E	Tmprss11e	Other	-3.56511	0.519968	-3.45936	0	0	0.00472615	1
ENSG00000087152	ENSMUSG00000059995	ATXN7L3	Atxn7l3	Other	10.3292	10.9122	0.0427072	2	0	0.0304286	1
ENSG00000087157	ENSMUSG00000017715	PGS1	Pgs1	Other	9.32489	11.0632	-1.11256	2	1	0.61504	1
ENSG00000087191	ENSMUSG00000020708	PSMC5	Psmc5	Other	10.6068	10.4466	0.785955	0	0	0.00459419	1
ENSG00000087206	ENSMUSG00000025878	UIMC1	Uimc1	Other	8.84411	12.3847	-2.91491	1	0	0.00251459	1
ENSG00000087245	ENSMUSG00000031740	MMP2	Mmp2	Other	-0.625445	-Inf	Inf	0	0	0.0771789	1
ENSG00000087250	ENSMUSG00000031760	MT3	Mt3	Other	1.43992	5.26096	-3.19531	0	0	0.0566895	1
ENSG00000087253	ENSMUSG00000033192	LPCAT2	Lpcat2	Other	4.20628	1.10452	3.72748	0	0	0.00340448	1
ENSG00000087258	ENSMUSG00000031748	GNAO1	Gnao1	Other	4.74133	2.51899	2.84807	2	0	0.00757233	1
ENSG00000087263	ENSMUSG00000033009	OGFOD1	Ogfod1	Other	9.28316	9.16367	0.745216	0	0	0.00300358	1
ENSG00000087266	ENSMUSG00000054520	SH3BP2	Sh3bp2	Alternative	9.7514	9.71465	0.662477	3	3	0.0110163	1
ENSG00000087269	ENSMUSG00000036693	NOP14	Nop14	Conserved	10.3004	10.3176	0.608579	1	1	0.00455835	1
ENSG00000087274	ENSMUSG00000029106	ADD1	Add1	Other	11.0863	13.076	-1.36393	2	1	0.00242915	1
ENSG00000087299	ENSMUSG00000020988	L2HGDH	L2hgdh	Other	7.57049	7.11604	1.08018	0	0	0.0046956	1
ENSG00000087301	ENSMUSG00000021830	TXNDC16	Txndc16	Other	7.68776	9.84646	-1.53298	1	2	0.000778217	1
ENSG00000087302	ENSMUSG00000021807	RTRAF	Rtraf	Other	10.3129	11.7269	-0.788267	0	0	0.690244	1
ENSG00000087303	ENSMUSG00000021806	NID2	Nid2	Other	3.97452	7.06621	-2.46597	2	0	0.00343659	1
ENSG00000087365	ENSMUSG00000024853	SF3B2	Sf3b2	Other	11.5036	12.4319	-0.30256	1	0	0.0810904	1
ENSG00000087448	ENSMUSG00000040102	KLHL42	Klhl42	Other	8.2191	9.49548	-0.650651	0	0	0.794903	1
ENSG00000087460	ENSMUSG00000027523	GNAS	Gnas	Other	12.6327	13.2185	0.0399135	3	0	0.0302106	1
ENSG00000087470	ENSMUSG00000022789	DNM1L	Dnm1l	Other	10.1892	11.0839	-0.26895	1	0	0.187401	1
ENSG00000087494	ENSMUSG00000048776	PTHLH	Pthlh	Other	-4.02433	-2.75339	-0.645224	0	0	0.121152	1
ENSG00000087495	ENSMUSG00000027525	PHACTR3	Phactr3	Other	3.28112	-3.07352	6.98036	0	0	8.0466e-11	1.2185e-06
ENSG00000087502	ENSMUSG00000030304	ERGIC2	Ergic2	Other	9.32888	10.801	-0.846417	0	1	0.110833	1
ENSG00000087510	ENSMUSG00000028640	TFAP2C	Tfap2c	Other	1.93231	2.48418	0.0738559	0	0	0.349821	1
ENSG00000087586	ENSMUSG00000027496	AURKA	Aurka	Other	8.85888	8.90671	0.577894	0	0	0.701196	1
ENSG00000087589	ENSMUSG00000074570	CASS4	Cass4	Conserved	7.33641	6.4899	1.47223	4	9	0.00814659	1
ENSG00000087842	ENSMUSG00000031379	PIR	Pir	Other	4.79562	2.39874	3.02261	0	0	0.00881349	1
ENSG00000087884	ENSMUSG00000035642	AAMDC	Aamdc	Other	5.08721	7.52335	-1.81042	0	0	4.81779e-06	0.0653148
ENSG00000088002	ENSMUSG00000003271	SULT2B1	Sult2b1	Other	3.47539	7.33525	-3.23414	0	2	1.36772e-05	0.180867
ENSG00000088035	ENSMUSG00000073792	ALG6	Alg6	Other	8.29504	7.76467	1.1561	0	0	0.000753327	1
ENSG00000088038	ENSMUSG00000035632	CNOT3	Cnot3	Other	9.01637	10.908	-1.26592	0	0	0.223928	1
ENSG00000088053	ENSMUSG00000078810	GP6	Gp6	Other	3.85684	3.47377	1.00879	0	0	0.156533	1
ENSG00000088179	ENSMUSG00000026384	PTPN4	Ptpn4	Other	9.59267	11.058	-0.839613	2	0	0.975707	1
ENSG00000088205	ENSMUSG00000001674	DDX18	Ddx18	Other	11.219	10.8987	0.946018	1	0	3.86153e-06	0.0526133
ENSG00000088256	ENSMUSG00000034781	GNA11	Gna11	Other	5.70354	9.29337	-2.96411	0	1	7.30499e-07	0.0102679
ENSG00000088280	ENSMUSG00000036995	ASAP3	Asap3	Other	3.73905	3.40015	0.964625	0	0	0.333987	1
ENSG00000088298	ENSMUSG00000038312	EDEM2	Edem2	Other	8.1839	9.73875	-0.929129	0	0	0.0210498	1
ENSG00000088320	ENSMUSG00000000359	REM1	Rem1	Other	-1.97683	-Inf	Inf	0	0	0.141068	1
ENSG00000088325	ENSMUSG00000027469	TPX2	Tpx2	Other	10.049	11.1777	-0.502981	0	0	0.475881	1
ENSG00000088356	ENSMUSG00000027472	PDRG1	Pdrg1	Other	7.50284	10.2558	-2.12722	0	0	1.09242e-08	0.000161066
ENSG00000088367	ENSMUSG00000027624	EPB41L1	Epb41l1	Other	1.79978	7.14511	-4.7196	0	1	4.29736e-05	0.548987
ENSG00000088386	ENSMUSG00000025557	SLC15A1	Slc15a1	Other	2.65429	5.51058	-2.23057	0	2	2.62561e-06	0.036063
ENSG00000088387	ENSMUSG00000025558	DOCK9	Dock9	Alternative	10.3947	11.23	-0.209542	5	4	0.0513071	1
ENSG00000088448	ENSMUSG00000031508	ANKRD10	Ankrd10	Other	10.7294	11.1473	0.207807	1	0	0.00850453	1
ENSG00000088451	ENSMUSG00000022130	TGDS	Tgds	Other	7.91974	9.13261	-0.587147	1	1	0.79307	1
ENSG00000088538	ENSMUSG00000039716	DOCK3	Dock3	Other	6.1934	2.31572	4.5034	2	1	6.69257e-09	9.90433e-05
ENSG00000088543	ENSMUSG00000037977	C3orf18	6430571L13Rik	Other	6.60939	7.00511	0.229997	0	0	0.0793663	1
ENSG00000088682	ENSMUSG00000031782	COQ9	Coq9	Other	7.5573	9.10633	-0.923308	1	0	0.0428902	1
ENSG00000088726	ENSMUSG00000059900	TMEM40	Tmem40	Other	3.02204	4.13974	-0.491975	0	2	0.872202	1
ENSG00000088727	ENSMUSG00000032489	KIF9	Kif9	Other	5.16256	6.22814	-0.439856	0	0	0.0430702	1
ENSG00000088756	ENSMUSG00000024043	ARHGAP28	Arhgap28	Other	4.99818	-3.93358	9.55748	0	0	3.33108e-09	4.94698e-05
ENSG00000088766	ENSMUSG00000027357	CRLS1	Crls1	Other	8.6328	8.32997	0.928554	1	0	0.00377888	1
ENSG00000088808	ENSMUSG00000021285	PPP1R13B	Ppp1r13b	Other	7.25664	10.3102	-2.42781	1	0	1.91341e-07	0.00274077
ENSG00000088812	ENSMUSG00000027312	ATRN	Atrn	Other	8.04879	10.1392	-1.46466	0	1	0.0171634	1
ENSG00000088826	ENSMUSG00000027333	SMOX	Smox	Other	8.16543	11.2192	-2.42809	1	5	0.000651435	1
ENSG00000088827	ENSMUSG00000027322	SIGLEC1	Siglec1	Mm-Specific	2.70186	1.75057	1.577	0	1	0.759125	1
ENSG00000088833	ENSMUSG00000027455	NSFL1C	Nsfl1c	Other	8.75356	10.2348	-0.855556	2	0	0.0497339	1
ENSG00000088836	ENSMUSG00000074796	SLC4A11	Slc4a11	Other	2.97974	6.20918	-2.60372	0	1	0.00733667	1
ENSG00000088854	ENSMUSG00000027309	C20orf194	4930402H24Rik	Other	6.53663	9.24049	-2.07814	0	0	0.000100612	1
ENSG00000088881	ENSMUSG00000053552	EBF4	Ebf4	Other	5.17174	-0.698535	6.496	1	0	4.211e-06	0.0572569
ENSG00000088882	ENSMUSG00000027408	CPXM1	Cpxm1	Other	3.94122	3.39764	1.1693	0	0	0.849558	1
ENSG00000088888	ENSMUSG00000037523	MAVS	Mavs	Other	10.1817	9.48895	1.31848	0	0	2.02188e-05	0.26426
ENSG00000088899	ENSMUSG00000037703	LZTS3	Lzts3	Other	7.62277	6.02347	2.22502	1	0	0.280374	1
ENSG00000088926	ENSMUSG00000031645	F11	F11	Other	1.03216	-Inf	Inf	0	0	0.170013	1
ENSG00000088930	ENSMUSG00000027433	XRN2	Xrn2	Other	10.936	12.1495	-0.587831	0	0	0.927005	1
ENSG00000088970	ENSMUSG00000074749	KIZ	Kiz	Other	7.61673	8.98445	-0.742001	0	0	0.213248	1
ENSG00000088986	ENSMUSG00000009013	DYNLL1	Dynll1	Other	9.79745	11.6755	-1.25238	3	0	0.537921	1
ENSG00000088992	ENSMUSG00000029359	TESC	Tesc	Alternative	7.06594	9.47969	-1.78803	2	2	0.00453462	1
ENSG00000089006	ENSMUSG00000027423	SNX5	Snx5	Other	10.9854	13.3741	-1.76295	1	3	0.0389788	1
ENSG00000089009	ENSMUSG00000029614	RPL6	Rpl6	Other	13.1129	15.3465	-1.60783	0	0	0.10225	1
ENSG00000089041	ENSMUSG00000029468	P2RX7	P2rx7	Alternative	7.99803	11.9015	-3.27774	2	4	1.45484e-06	0.0202223
ENSG00000089048	ENSMUSG00000045624	ESF1	Esf1	Other	9.03814	10.2839	-0.620045	0	1	0.324465	1
ENSG00000089050	ENSMUSG00000027428	RBBP9	Rbbp9	Other	7.91455	7.37092	1.16934	0	0	0.00447723	1
ENSG00000089053	ENSMUSG00000029472	ANAPC5	Anapc5	Other	10.9517	12.0446	-0.467153	1	0	0.21501	1
ENSG00000089057	ENSMUSG00000027340	SLC23A2	Slc23a2	Other	9.15455	10.0316	-0.251322	1	1	0.521066	1
ENSG00000089060	ENSMUSG00000032754	SLC8B1	Slc8b1	Other	8.88997	7.76254	1.75315	0	0	0.000473518	1
ENSG00000089063	ENSMUSG00000027341	TMEM230	Tmem230	Other	8.95438	9.33604	0.244065	4	0	0.018097	1
ENSG00000089091	ENSMUSG00000037259	DZANK1	Dzank1	Other	5.56358	4.86383	1.32548	0	1	0.00684963	1
ENSG00000089094	ENSMUSG00000029475	KDM2B	Kdm2b	Conserved	9.86633	12.2398	-1.74777	3	4	0.301206	1
ENSG00000089101	ENSMUSG00000037143	CFAP61	Cfap61	Other	0.408775	4.6985	-3.66401	0	0	4.74173e-06	0.0643121
ENSG00000089116	ENSMUSG00000029595	LHX5	Lhx5	Other	0.502807	2.16575	-1.03722	0	0	0.00030666	1
ENSG00000089123	ENSMUSG00000039033	TASP1	Tasp1	Other	7.14325	11.0189	-3.24992	0	3	6.65515e-08	0.00096493
ENSG00000089154	ENSMUSG00000041638	GCN1	Gcn1l1	Other	11.7264	11.298	1.05415	0	0	1.39923e-06	0.019459
ENSG00000089159	ENSMUSG00000029528	PXN	Pxn	Conserved	11.402	10.8742	1.15351	4	5	0.00718972	1
ENSG00000089163	ENSMUSG00000029524	SIRT4	Sirt4	Other	3.77585	6.437	-2.03542	4	2	1.00417e-06	0.0140493
ENSG00000089169	ENSMUSG00000029608	RPH3A	Rph3a	Other	3.8339	3.71137	0.748251	1	0	0.763034	1
ENSG00000089177	ENSMUSG00000038844	KIF16B	Kif16b	Other	7.66859	9.55405	-1.25974	0	1	0.0718235	1
ENSG00000089195	ENSMUSG00000037376	TRMT6	Trmt6	Other	8.24412	9.79003	-0.920186	1	0	0.0150156	1
ENSG00000089199	ENSMUSG00000027350	CHGB	Chgb	Other	2.30623	0.32171	2.61024	0	0	0.0100878	1
ENSG00000089220	ENSMUSG00000047104	PEBP1	Pbp2	Other	10.1139	-Inf	Inf	0	0	9.18271e-19	1.41937e-14
ENSG00000089225	ENSMUSG00000018263	TBX5	Tbx5	Other	0.397618	2.75433	-1.73099	0	0	0.000537759	1
ENSG00000089234	ENSMUSG00000029458	BRAP	Brap	Other	8.715	10.8925	-1.55173	0	0	3.27077e-06	0.0446885
ENSG00000089248	ENSMUSG00000029616	ERP29	Erp29	Other	10.1004	10.6071	0.119057	0	0	0.0191507	1
ENSG00000089250	ENSMUSG00000029361	NOS1	Nos1	Other	4.71696	3.90323	1.43945	0	0	0.143349	1
ENSG00000089280	ENSMUSG00000030795	FUS	Fus	Conserved	12.187	13.1097	-0.296931	2	2	0.651641	1
ENSG00000089351	ENSMUSG00000001248	GRAMD1A	Gramd1a	Other	9.92321	13.1919	-2.64301	2	5	2.17e-05	0.283033
ENSG00000089472	ENSMUSG00000031209	HEPH	Heph	Other	0.967232	-Inf	Inf	0	0	0.0272506	1
ENSG00000089486	ENSMUSG00000004071	CDIP1	Cdip1	Other	8.04707	9.96957	-1.29678	0	1	0.000177619	1
ENSG00000089558	ENSMUSG00000035355	KCNH4	Kcnh4	Other	4.07318	4.98121	-0.282304	1	0	0.281087	1
ENSG00000089597	ENSMUSG00000071650	GANAB	Ganab	Other	11.2561	11.8035	0.0783223	1	0	0.0801101	1
ENSG00000089639	ENSMUSG00000036246	GMIP	Gmip	Other	10.0234	11.686	-1.0369	1	0	0.416885	1
ENSG00000089682	ENSMUSG00000031433	RBM41	Rbm41	Other	7.43136	8.70071	-0.643634	0	0	0.755774	1
ENSG00000089685	ENSMUSG00000017716	BIRC5	Birc5	Other	9.29476	10.7568	-0.836313	1	0	0.38372	1
ENSG00000089692	ENSMUSG00000030124	LAG3	Lag3	Conserved	8.51692	9.75965	-0.617008	2	1	0.517857	1
ENSG00000089693	ENSMUSG00000030120	MLF2	Mlf2	Other	9.62805	10.662	-0.408233	1	0	0.861394	1
ENSG00000089723	ENSMUSG00000021203	OTUB2	Otub2	Other	5.18723	5.98698	-0.174029	0	0	0.0997095	1
ENSG00000089737	ENSMUSG00000041645	DDX24	Ddx24	Other	11.4879	11.9832	0.130354	0	0	0.0316936	1
ENSG00000089775	ENSMUSG00000056459	ZBTB25	Zbtb25	Other	9.65144	9.71356	0.563605	2	2	0.012856	1
ENSG00000089818	ENSMUSG00000030327	NECAP1	Necap1	Alternative	9.83971	9.56166	0.903763	1	2	4.45295e-05	0.568019
ENSG00000089820	ENSMUSG00000031389	ARHGAP4	Arhgap4	Other	10.9691	12.6474	-1.05255	2	0	0.839551	1
ENSG00000089847	ENSMUSG00000054708	ANKRD24	Ankrd24	Other	3.37009	7.05108	-3.05526	0	0	1.53087e-05	0.201707
ENSG00000089876	ENSMUSG00000030986	DHX32	Dhx32	Other	7.97409	9.13796	-0.538147	0	0	0.0501179	1
ENSG00000089902	ENSMUSG00000037896	RCOR1	Rcor1	Conserved	9.38267	11.3511	-1.34274	1	1	0.000467292	1
ENSG00000089916	ENSMUSG00000021254	GPATCH2L	Gpatch2l	Other	10.6542	10.1046	1.17529	0	0	1.92019e-05	0.251385
ENSG00000090006	ENSMUSG00000040488	LTBP4	Ltbp4	Other	9.55323	4.24399	5.93496	3	0	4.74889e-09	7.04213e-05
ENSG00000090013	ENSMUSG00000040466	BLVRB	Blvrb	Other	5.64501	7.21752	-0.94679	0	0	0.246025	1
ENSG00000090020	ENSMUSG00000028854	SLC9A1	Slc9a1	Conserved	7.86561	10.5982	-2.10689	3	3	0.00578795	1
ENSG00000090054	ENSMUSG00000021468	SPTLC1	Sptlc1	Conserved	9.78165	11.0468	-0.639452	1	4	0.563365	1
ENSG00000090060	ENSMUSG00000021111	PAPOLA	Papola	Other	11.245	12.7239	-0.853124	0	0	0.618887	1
ENSG00000090061	ENSMUSG00000021258	CCNK	Ccnk	Other	9.41846	11.0584	-1.01424	0	0	0.0158136	1
ENSG00000090097	ENSMUSG00000023495	PCBP4	Pcbp4	Other	6.93797	9.18347	-1.61978	0	0	0.0582397	1
ENSG00000090104	ENSMUSG00000026358	RGS1	Rgs1	Conserved	11.0991	13.2659	-1.54106	4	18	0.18699	1
ENSG00000090238	ENSMUSG00000042675	YPEL3	Ypel3	Other	9.08354	11.6592	-1.94992	1	0	0.000394953	1
ENSG00000090263	ENSMUSG00000029918	MRPS33	Mrps33	Other	7.99062	10.2325	-1.61617	1	0	0.136439	1
ENSG00000090266	ENSMUSG00000002416	NDUFB2	Ndufb2	Other	9.02837	9.55911	0.0949804	0	0	0.0613598	1
ENSG00000090273	ENSMUSG00000028851	NUDC	Nudc	Other	9.78547	10.4373	-0.0261086	0	0	0.0584596	1
ENSG00000090316	ENSMUSG00000079562	MAEA	Maea	Other	9.84012	10.7614	-0.295557	3	0	0.336256	1
ENSG00000090339	ENSMUSG00000037405	ICAM1	Icam1	Conserved	8.56981	11.7033	-2.50782	3	1	0.00020665	1
ENSG00000090372	ENSMUSG00000030374	STRN4	Strn4	Conserved	9.6928	10.6872	-0.36872	1	2	0.507581	1
ENSG00000090376	ENSMUSG00000020227	IRAK3	Irak3	Other	6.54194	5.94134	1.22632	0	2	0.981287	1
ENSG00000090382	ENSMUSG00000020177	LYZ	9530003J23Rik	Other	4.03996	-0.884778	5.55046	0	0	0.0104526	1
ENSG00000090402	ENSMUSG00000027790	SI	Sis	Other	-2.61394	-0.547483	-1.44073	0	0	0.0823876	1
ENSG00000090432	ENSMUSG00000041241	MUL1	Mul1	Other	7.77368	9.43209	-1.03269	0	0	0.402884	1
ENSG00000090447	ENSMUSG00000005718	TFAP4	Tfap4	Conserved	7.47019	8.02629	0.06962	4	1	0.143111	1
ENSG00000090470	ENSMUSG00000041837	PDCD7	Pdcd7	Other	8.55975	9.08446	0.101014	0	0	0.0209212	1
ENSG00000090487	ENSMUSG00000032388	SPG21	Spg21	Other	9.05619	9.96407	-0.282163	1	1	0.259216	1
ENSG00000090512	ENSMUSG00000022871	FETUB	Fetub	Other	-2.57497	-1.64536	-0.303889	0	0	0.10167	1
ENSG00000090530	ENSMUSG00000038168	P3H2	P3h2	Other	1.78159	3.98507	-1.57777	0	0	0.000380834	1
ENSG00000090534	ENSMUSG00000022847	THPO	Thpo	Other	1.16549	-Inf	Inf	0	0	0.269417	1
ENSG00000090539	ENSMUSG00000006958	CHRD	Chrd	Other	1.656	0.756537	1.52519	0	2	0.979385	1
ENSG00000090554	ENSMUSG00000110206	FLT3LG	Flt3l	Conserved	9.46477	10.606	-0.515494	1	1	0.292201	1
ENSG00000090565	ENSMUSG00000037098	RAB11FIP3	Rab11fip3	Other	8.26911	9.2858	-0.390977	0	0	0.273782	1
ENSG00000090581	ENSMUSG00000035521	GNPTG	Gnptg	Other	8.33721	9.88708	-0.924147	1	0	0.0439008	1
ENSG00000090615	ENSMUSG00000029502	GOLGA3	Golga3	Other	10.7347	10.7622	0.598182	1	0	0.00013814	1
ENSG00000090621	ENSMUSG00000011257	PABPC4	Pabpc4	Conserved	10.724	10.755	0.594727	1	1	0.000141061	1
ENSG00000090661	ENSMUSG00000008206	CERS4	Cers4	Other	6.68082	10.2096	-2.90304	1	0	7.94439e-06	0.106582
ENSG00000090674	ENSMUSG00000004567	MCOLN1	Mcoln1	Other	6.74277	9.68313	-2.31464	1	0	1.15837e-05	0.153739
ENSG00000090686	ENSMUSG00000043411	USP48	Usp48	Conserved	10.6844	12.3069	-0.996807	2	4	0.58878	1
ENSG00000090776	ENSMUSG00000031217	EFNB1	Efnb1	Other	5.57371	4.97101	1.22843	0	0	0.0272424	1
ENSG00000090857	ENSMUSG00000033624	PDPR	Pdpr	Other	9.86034	9.82164	0.664417	1	0	0.0200027	1
ENSG00000090861	ENSMUSG00000031960	AARS	Aars	Other	10.2644	11.3558	-0.465591	1	0	0.924538	1
ENSG00000090863	ENSMUSG00000003316	GLG1	Glg1	Other	11.3411	12.2323	-0.265479	4	1	0.283531	1
ENSG00000090889	ENSMUSG00000034311	KIF4A	Kif4	Other	8.78864	9.73812	-0.32376	0	0	0.25912	1
ENSG00000090905	ENSMUSG00000052707	TNRC6A	Tnrc6a	Other	10.4245	13.0667	-2.01641	0	2	0.00189794	1
ENSG00000090924	ENSMUSG00000037552	PLEKHG2	Plekhg2	Other	9.30761	10.5806	-0.647268	2	0	0.326153	1
ENSG00000090932	ENSMUSG00000003436	DLL3	Dll3	Other	2.29255	1.2279	1.69038	1	0	0.663627	1
ENSG00000090971	ENSMUSG00000035285	NAT14	Nat14	Other	5.24957	5.72598	0.149316	0	0	0.628541	1
ENSG00000090975	ENSMUSG00000029406	PITPNM2	Pitpnm2	Other	7.29803	10.3322	-2.40849	3	4	0.000121774	1
ENSG00000090989	ENSMUSG00000036435	EXOC1	Exoc1	Other	9.22261	10.4535	-0.60515	0	0	0.232999	1
ENSG00000091010	ENSMUSG00000024497	POU4F3	Pou4f3	Other	0.791516	-3.93358	5.35081	0	0	0.00385354	1
ENSG00000091039	ENSMUSG00000020189	OSBPL8	Osbpl8	Conserved	11.3599	13.3467	-1.36112	3	6	0.0692025	1
ENSG00000091073	ENSMUSG00000004947	DTX2	Dtx2	Other	6.82542	9.17145	-1.7203	2	0	0.000256803	1
ENSG00000091127	ENSMUSG00000057541	PUS7	Pus7	Other	8.36625	9.46428	-0.47231	0	0	0.0721542	1
ENSG00000091129	ENSMUSG00000020598	NRCAM	Nrcam	Other	1.77853	3.73697	-1.33272	0	0	0.00551312	1
ENSG00000091136	ENSMUSG00000002900	LAMB1	Lamb1	Other	5.07985	3.42757	2.278	0	0	0.000913981	1
ENSG00000091137	ENSMUSG00000020651	SLC26A4	Slc26a4	Other	5.46825	-Inf	Inf	0	0	2.09759e-05	0.273798
ENSG00000091138	ENSMUSG00000001225	SLC26A3	Slc26a3	Other	1.90715	4.82589	-2.29302	0	1	0.000267408	1
ENSG00000091140	ENSMUSG00000020664	DLD	Dld	Other	9.89708	11.1157	-0.592921	0	0	0.481247	1
ENSG00000091157	ENSMUSG00000040560	WDR7	Wdr7	Other	9.60406	9.69231	0.537472	3	0	0.111342	1
ENSG00000091164	ENSMUSG00000024583	TXNL1	Txnl1	Other	9.31828	11.0121	-1.06805	1	0	0.718335	1
ENSG00000091181	ENSMUSG00000005364	IL5RA	Il5ra	Other	4.54924	3.31823	1.85673	0	0	0.877531	1
ENSG00000091262	ENSMUSG00000030834	ABCC6	Abcc6	Other	4.48833	-4.96339	10.0774	0	0	9.09667e-11	1.37696e-06
ENSG00000091317	ENSMUSG00000032434	CMTM6	Cmtm6	Other	10.5773	11.9459	-0.742906	0	1	0.658343	1
ENSG00000091409	ENSMUSG00000027111	ITGA6	Itga6	Conserved	10.6426	11.9176	-0.649219	4	1	0.809868	1
ENSG00000091428	ENSMUSG00000049044	RAPGEF4	Rapgef4	Other	1.44482	10.6951	-8.62457	0	2	6.87831e-11	1.042e-06
ENSG00000091436	ENSMUSG00000004085	MAP3K20	Map3k20	Alternative	8.25553	5.22557	3.65568	3	3	7.40997e-06	0.0995752
ENSG00000091482	ENSMUSG00000041476	SMPX	Smpx	Other	-2.56337	-Inf	Inf	0	0	0.121668	1
ENSG00000091483	ENSMUSG00000026526	FH	Fh1	Other	9.10299	10.0876	-0.358869	0	1	0.553699	1
ENSG00000091490	ENSMUSG00000029189	SEL1L3	Sel1l3	Other	9.77891	4.73152	5.67312	1	0	7.24341e-08	0.00104935
ENSG00000091527	ENSMUSG00000032803	CDV3	Cdv3	Other	11.9803	12.1411	0.464873	0	0	3.36822e-05	0.433691
ENSG00000091536	ENSMUSG00000042678	MYO15A	Myo15	Other	5.36507	3.70994	2.28085	0	0	0.0102368	1
ENSG00000091542	ENSMUSG00000042650	ALKBH5	Alkbh5	Other	10.3051	11.2832	-0.352335	1	0	0.370499	1
ENSG00000091583	ENSMUSG00000000049	APOH	Apoh	Other	0.219808	-Inf	Inf	1	0	0.0343497	1
ENSG00000091622	ENSMUSG00000040543	PITPNM3	Pitpnm3	Other	3.797	2.91094	1.51178	0	0	0.0812678	1
ENSG00000091640	ENSMUSG00000018287	SPAG7	Spag7	Other	8.50505	9.43681	-0.306042	0	0	0.41746	1
ENSG00000091651	ENSMUSG00000031697	ORC6	Orc6	Other	8.36335	9.38302	-0.393944	0	0	0.335902	1
ENSG00000091656	ENSMUSG00000025255	ZFHX4	Zfhx4	Other	3.40498	-3.50981	7.54052	0	0	0.00135624	1
ENSG00000091664	ENSMUSG00000030500	SLC17A6	Slc17a6	Mm-Specific	0.141116	7.00978	-6.24294	0	4	0.00121222	1
ENSG00000091704	ENSMUSG00000054446	CPA1	Cpa1	Other	-0.310002	-Inf	Inf	0	0	0.18234	1
ENSG00000091732	ENSMUSG00000039130	ZC3HC1	Zc3hc1	Other	7.59023	8.71776	-0.501802	0	6	0.337122	1
ENSG00000091831	ENSMUSG00000019768	ESR1	Esr1	Alternative	6.70463	6.56145	0.768908	1	1	0.301755	1
ENSG00000091844	ENSMUSG00000019775	RGS17	Rgs17	Other	4.98969	1.27627	4.33914	0	0	2.20486e-08	0.000322967
ENSG00000091879	ENSMUSG00000031465	ANGPT2	Angpt2	Other	5.47601	5.61743	0.484303	0	0	0.279709	1
ENSG00000091947	ENSMUSG00000020921	TMEM101	Tmem101	Other	7.71035	7.49184	0.844232	1	0	0.0124359	1
ENSG00000091972	ENSMUSG00000022661	CD200	Cd200	Other	9.46937	9.30419	0.790905	0	4	0.272605	1
ENSG00000091986	ENSMUSG00000022665	CCDC80	Ccdc80	Other	5.46948	0.782918	5.31229	5	4	8.2734e-10	1.23944e-05
ENSG00000092009	ENSMUSG00000022225	CMA1	Cma1	Other	-1.48419	-1.75339	0.894917	1	1	0.712211	1
ENSG00000092010	ENSMUSG00000022216	PSME1	Psme1	Other	11.0845	13.1193	-1.40905	0	0	0.0718553	1
ENSG00000092020	ENSMUSG00000021022	PPP2R3C	Ppp2r3c	Other	8.87574	9.53915	-0.0376919	0	0	0.161443	1
ENSG00000092051	ENSMUSG00000022208	JPH4	Jph4	Other	2.57672	2.30806	0.894379	0	0	0.770264	1
ENSG00000092054	ENSMUSG00000053093	MYH7	Myh7	Other	3.24655	3.82635	0.0459164	0	0	0.968709	1
ENSG00000092067	ENSMUSG00000052435	CEBPE	Cebpe	Other	0.997672	-0.786418	2.40981	0	0	0.699992	1
ENSG00000092068	ENSMUSG00000022180	SLC7A8	Slc7a8	Other	2.73419	2.65599	0.703924	0	0	0.520303	1
ENSG00000092094	ENSMUSG00000006289	OSGEP	Osgep	Other	8.94642	9.49702	0.0751229	0	0	0.0400309	1
ENSG00000092096	ENSMUSG00000022199	SLC22A17	Slc22a17	Other	5.86408	7.04041	-0.550609	0	0	0.269136	1
ENSG00000092108	ENSMUSG00000020952	SCFD1	Scfd1	Other	9.29888	10.547	-0.622368	1	0	0.8367	1
ENSG00000092140	ENSMUSG00000035293	G2E3	G2e3	Other	9.23171	10.6331	-0.775697	0	0	0.842808	1
ENSG00000092148	ENSMUSG00000035247	HECTD1	Hectd1	Alternative	11.3913	14.2542	-2.23723	7	2	0.00024901	1
ENSG00000092200	ENSMUSG00000057132	RPGRIP1	Rpgrip1	Other	4.33401	9.3668	-4.40706	0	0	8.48226e-08	0.00122704
ENSG00000092201	ENSMUSG00000035726	SUPT16H	Supt16	Other	11.3608	11.7718	0.21478	0	1	0.0427451	1
ENSG00000092203	ENSMUSG00000016831	TOX4	Tox4	Conserved	9.71134	12.2916	-1.9545	1	1	0.00622161	1
ENSG00000092208	ENSMUSG00000060121	GEMIN2	Gemin2	Other	6.7962	8.05052	-0.628597	1	0	0.445223	1
ENSG00000092295	ENSMUSG00000022218	TGM1	Tgm1	Other	4.55725	2.89574	2.28723	0	0	0.000940534	1
ENSG00000092330	ENSMUSG00000007589	TINF2	Tinf2	Conserved	9.67024	10.1485	0.147486	1	1	0.0645288	1
ENSG00000092421	ENSMUSG00000019647	SEMA6A	Sema6a	Other	5.21742	3.46138	2.38176	0	2	0.000114325	1
ENSG00000092439	ENSMUSG00000027365	TRPM7	Trpm7	Other	10.7948	12.0413	-0.62078	1	0	0.550052	1
ENSG00000092445	ENSMUSG00000027298	TYRO3	Tyro3	Other	5.47217	7.75261	-1.65472	0	0	0.00189602	1
ENSG00000092470	ENSMUSG00000027242	WDR76	Wdr76	Other	9.52904	9.55994	0.594829	1	0	0.181305	1
ENSG00000092529	ENSMUSG00000079110	CAPN3	Capn3	Other	5.7677	7.34138	-0.947963	0	0	0.265805	1
ENSG00000092531	ENSMUSG00000027287	SNAP23	Snap23	Other	9.64093	10.4182	-0.151552	0	1	0.0531849	1
ENSG00000092607	ENSMUSG00000027868	TBX15	Tbx15	Other	0.955825	1.20873	0.372813	0	0	0.0195392	1
ENSG00000092621	ENSMUSG00000053398	PHGDH	Phgdh	Other	8.24487	9.96467	-1.09407	0	0	0.0607607	1
ENSG00000092820	ENSMUSG00000052397	EZR	Ezr	Conserved	11.9459	13.1924	-0.620795	7	5	0.150571	1
ENSG00000092841	ENSMUSG00000090841	MYL6	Myl6	Other	12.5315	13.4772	-0.319909	0	0	0.0950765	1
ENSG00000092847	ENSMUSG00000041530	AGO1	Ago1	Other	9.57003	10.6111	-0.415314	0	0	0.736023	1
ENSG00000092850	ENSMUSG00000028845	TEKT2	Tekt2	Other	2.08892	1.08619	1.62845	0	0	0.878228	1
ENSG00000092853	ENSMUSG00000042489	CLSPN	Clspn	Other	9.0585	8.93164	0.752579	1	0	0.980305	1
ENSG00000092929	ENSMUSG00000057948	UNC13D	Unc13d	Other	9.72151	11.4691	-1.12184	1	0	0.0959371	1
ENSG00000092931	ENSMUSG00000020818	MFSD11	Mfsd11	Conserved	8.27316	8.12545	0.773434	4	1	0.00039792	1
ENSG00000092964	ENSMUSG00000022048	DPYSL2	Dpysl2	Conserved	8.74433	10.9916	-1.62159	2	1	0.00111029	1
ENSG00000092969	ENSMUSG00000039239	TGFB2	Tgfb2	Other	-0.137844	-0.135674	0.623552	0	0	0.181523	1
ENSG00000092978	ENSMUSG00000039210	GPATCH2	Gpatch2	Other	8.28672	9.34182	-0.42938	0	1	0.583414	1
ENSG00000093009	ENSMUSG00000000028	CDC45	Cdc45	Other	8.30005	8.88855	0.0372267	0	0	0.627542	1
ENSG00000093010	ENSMUSG00000000326	COMT	Comt	Other	8.4795	10.2653	-1.16004	1	0	0.00554246	1
ENSG00000093134	ENSMUSG00000020010	VNN3	Vnn3	Other	4.38274	-Inf	Inf	0	0	0.000135992	1
ENSG00000093144	ENSMUSG00000019883	ECHDC1	Echdc1	Other	9.33979	9.00687	0.958647	1	0	0.000843401	1
ENSG00000093167	ENSMUSG00000032497	LRRFIP2	Lrrfip2	Other	9.34138	9.26741	0.699696	1	0	0.000525575	1
ENSG00000093183	ENSMUSG00000061536	SEC22C	Sec22c	Other	9.83824	10.1586	0.305343	0	1	0.0621066	1
ENSG00000093217	ENSMUSG00000035769	XYLB	Xylb	Other	5.18147	5.1253	0.681895	2	0	0.903049	1
ENSG00000094631	ENSMUSG00000031161	HDAC6	Hdac6	Other	9.11769	8.67482	1.06859	0	0	0.000797578	1
ENSG00000094661	ENSMUSG00000071185	OR1I1	Olfr1357	Other	5.66576	0.206906	6.08458	0	0	3.95493e-12	6.0459e-08
ENSG00000094755	ENSMUSG00000020159	GABRP	Gabrp	Other	4.16044	-Inf	Inf	0	0	7.20986e-05	0.904765
ENSG00000094804	ENSMUSG00000017499	CDC6	Cdc6	Conserved	8.66198	7.95532	1.33238	2	1	0.286565	1
ENSG00000094841	ENSMUSG00000073016	UPRT	Uprt	Other	7.8008	7.68347	0.743053	0	0	0.0111372	1
ENSG00000094880	ENSMUSG00000024370	CDC23	Cdc23	Other	8.93555	10.1791	-0.61781	0	0	0.330842	1
ENSG00000094914	ENSMUSG00000036678	AAAS	Aaas	Conserved	8.20057	10.2624	-1.43615	1	1	0.0197398	1
ENSG00000094916	ENSMUSG00000009575	CBX5	Cbx5	Other	11.3477	11.6995	0.273899	2	1	0.0222699	1
ENSG00000094963	ENSMUSG00000040170	FMO2	Fmo2	Other	-0.936232	3.80439	-4.1149	0	0	0.0635794	1
ENSG00000094975	ENSMUSG00000040297	SUCO	Suco	Conserved	10.1704	11.413	-0.616895	1	2	0.572355	1
ENSG00000095002	ENSMUSG00000024151	MSH2	Msh2	Other	9.5565	9.74942	0.432798	3	0	0.148368	1
ENSG00000095015	ENSMUSG00000021754	MAP3K1	Map3k1	Other	11.0041	11.741	-0.111131	0	2	0.341598	1
ENSG00000095066	ENSMUSG00000052566	HOOK2	Hook2	Conserved	6.77653	8.76182	-1.35956	3	1	0.000510582	1
ENSG00000095139	ENSMUSG00000032096	ARCN1	Arcn1	Other	11.2691	12.0926	-0.1978	0	0	0.0315478	1
ENSG00000095203	ENSMUSG00000028434	EPB41L4B	Epb41l4b	Other	2.8297	0.0650033	3.39042	1	0	0.0323156	1
ENSG00000095209	ENSMUSG00000028420	TMEM38B	Tmem38b	Other	6.99715	9.09725	-1.47438	0	0	0.0417764	1
ENSG00000095261	ENSMUSG00000026869	PSMD5	Psmd5	Other	9.98253	10.1621	0.446175	0	0	0.00593482	1
ENSG00000095303	ENSMUSG00000047250	PTGS1	Ptgs1	Other	1.21496	1.18613	0.654551	0	2	0.229119	1
ENSG00000095319	ENSMUSG00000052533	NUP188	Nup188	Other	10.7035	10.1077	1.22157	1	0	0.000233093	1
ENSG00000095321	ENSMUSG00000026853	CRAT	Crat	Other	6.6345	7.09994	0.160281	0	0	0.673331	1
ENSG00000095370	ENSMUSG00000059013	SH2D3C	Sh2d3c	Alternative	8.45642	11.8597	-2.77759	2	2	1.75816e-08	0.000258116
ENSG00000095380	ENSMUSG00000028334	NANS	Nans	Other	8.75549	9.89054	-0.509326	0	1	0.968734	1
ENSG00000095383	ENSMUSG00000039813	TBC1D2	Tbc1d2	Conserved	5.75633	5.62625	0.755809	2	3	0.0811291	1
ENSG00000095397	ENSMUSG00000039137	WHRN	Whrn	Other	6.65213	7.11495	0.162904	1	0	0.558059	1
ENSG00000095464	ENSMUSG00000024992	PDE6C	Pde6c	Other	4.03617	-0.566381	5.22828	0	0	3.10975e-06	0.0425352
ENSG00000095485	ENSMUSG00000025200	CWF19L1	Cwf19l1	Other	9.37084	8.63963	1.35693	1	0	3.42348e-06	0.0467442
ENSG00000095539	ENSMUSG00000025207	SEMA4G	Sema4g	Other	4.80822	5.49243	-0.0584916	0	0	0.386508	1
ENSG00000095564	ENSMUSG00000040565	BTAF1	Btaf1	Other	11.4845	11.2988	0.811417	0	0	0.0003063	1
ENSG00000095574	ENSMUSG00000040167	IKZF5	Ikzf5	Conserved	9.3141	9.77666	0.16316	1	1	0.992956	1
ENSG00000095585	ENSMUSG00000061132	BLNK	Blnk	Other	1.80501	3.81411	-1.38337	0	0	0.00101802	1
ENSG00000095587	ENSMUSG00000025013	TLL2	Tll2	Other	3.01906	-3.13073	6.77551	0	1	0.000126441	1
ENSG00000095596	ENSMUSG00000024987	CYP26A1	Cyp26a1	Other	-0.804156	0.785585	-0.964019	0	0	0.0149954	1
ENSG00000095627	ENSMUSG00000025081	TDRD1	Tdrd1	Other	2.79941	0.384465	3.04067	0	0	0.00264317	1
ENSG00000095637	ENSMUSG00000025006	SORBS1	Sorbs1	Other	4.70763	7.68426	-2.35091	0	0	0.000379981	1
ENSG00000095713	ENSMUSG00000042401	CRTAC1	Crtac1	Other	0.273787	2.03154	-1.13203	2	0	0.0309681	1
ENSG00000095752	ENSMUSG00000004371	IL11	Il11	Other	2.14453	2.2675	0.502746	0	0	0.174129	1
ENSG00000095777	ENSMUSG00000025716	MYO3A	Myo3a	Other	1.47464	-Inf	Inf	0	0	0.302903	1
ENSG00000095787	ENSMUSG00000024283	WAC	Wac	Other	11.3102	12.229	-0.293124	2	1	0.242771	1
ENSG00000095794	ENSMUSG00000063889	CREM	Crem	Conserved	9.7216	12.3276	-1.98024	5	2	0.391222	1
ENSG00000095932	ENSMUSG00000078439	SMIM24	Smim24	Other	1.5218	7.14614	-4.99862	0	0	4.69666e-08	0.000683739
ENSG00000095951	ENSMUSG00000021366	HIVEP1	Hivep1	Conserved	9.99529	12.17	-1.54898	2	3	0.167589	1
ENSG00000095970	ENSMUSG00000023992	TREM2	Trem2	Other	-1.06601	3.4235	-3.86379	0	0	0.000194561	1
ENSG00000095981	ENSMUSG00000023387	KCNK16	Kcnk16	Other	-2.50406	-Inf	Inf	0	0	0.245014	1
ENSG00000096060	ENSMUSG00000024222	FKBP5	Fkbp5	Conserved	10.6167	9.88321	1.35924	5	2	2.70155e-06	0.0370761
ENSG00000096080	ENSMUSG00000023967	MRPS18A	Mrps18a	Conserved	7.36004	8.58088	-0.595111	1	1	0.276124	1
ENSG00000096088	ENSMUSG00000023987	PGC	Pgc	Other	0.111637	-2.64285	3.38021	0	0	0.764421	1
ENSG00000096092	ENSMUSG00000025933	TMEM14A	Tmem14a	Other	6.19642	5.39873	1.42342	0	0	0.141182	1
ENSG00000096093	ENSMUSG00000041809	EFHC1	Efhc1	Other	6.55244	4.64654	2.53162	4	0	2.1124e-05	0.275668
ENSG00000096384	ENSMUSG00000023944	HSP90AB1	Hsp90ab1	Conserved	13.6103	14.9527	-0.716611	3	1	0.940885	1
ENSG00000096433	ENSMUSG00000042644	ITPR3	Itpr3	Other	11.0594	11.3517	0.333435	2	1	0.0269371	1
ENSG00000096696	ENSMUSG00000054889	DSP	Dsp	Other	1.76701	6.32722	-3.93449	0	0	8.25313e-06	0.1106
ENSG00000096717	ENSMUSG00000020063	SIRT1	Sirt1	Other	9.4331	10.4585	-0.399662	1	0	0.503093	1
ENSG00000096746	ENSMUSG00000020069	HNRNPH3	Hnrnph3	Other	11.0853	10.571	1.14008	1	0	0.00271444	1
ENSG00000096872	ENSMUSG00000028576	IFT74	Ift74	Other	6.40489	7.32405	-0.293436	0	0	0.973562	1
ENSG00000096968	ENSMUSG00000024789	JAK2	Jak2	Conserved	10.9057	12.9517	-1.42031	3	7	0.0466654	1
ENSG00000096996	ENSMUSG00000000791	IL12RB1	Il12rb1	Conserved	8.937	9.55969	0.00303143	5	3	0.21057	1
ENSG00000097007	ENSMUSG00000026842	ABL1	Abl1	Other	8.72776	10.6851	-1.33166	1	0	0.00766337	1
ENSG00000097021	ENSMUSG00000028937	ACOT7	Acot7	Conserved	7.72075	10.4732	-2.12669	4	2	0.0133817	1
ENSG00000097033	ENSMUSG00000037062	SH3GLB1	Sh3glb1	Conserved	10.3086	12.2677	-1.33337	2	2	0.112282	1
ENSG00000097046	ENSMUSG00000029283	CDC7	Cdc7	Other	8.34173	9.01988	-0.0524185	7	2	0.243811	1
ENSG00000097096	ENSMUSG00000036863	SYDE2	Syde2	Other	5.37595	4.92679	1.07488	1	0	0.0488372	1
ENSG00000099139	ENSMUSG00000024713	PCSK5	Pcsk5	Other	9.98571	-1.25816	11.8696	0	0	5.93231e-08	0.000861727
ENSG00000099203	ENSMUSG00000032180	TMED1	Tmed1	Other	6.95458	6.64057	0.939726	0	0	0.0158668	1
ENSG00000099204	ENSMUSG00000025085	ABLIM1	Ablim1	Conserved	11.4675	14.2008	-2.10757	5	4	0.00033971	1
ENSG00000099219	ENSMUSG00000046324	ERMP1	Ermp1	Conserved	9.38664	10.6954	-0.683059	4	2	0.117501	1
ENSG00000099250	ENSMUSG00000025810	NRP1	Nrp1	Conserved	4.95019	10.3912	-4.81527	10	8	3.29682e-05	0.424894
ENSG00000099260	ENSMUSG00000033377	PALMD	Palmd	Other	2.13184	1.27224	1.48532	0	0	0.156183	1
ENSG00000099282	ENSMUSG00000037031	TSPAN15	Tspan15	Other	5.09459	4.74224	0.978072	1	0	0.947338	1
ENSG00000099284	ENSMUSG00000020086	H2AFY2	H2afy2	Hs-Specific	4.5512	4.13477	1.04215	1	0	0.0501154	1
ENSG00000099308	ENSMUSG00000031833	MAST3	Mast3	Other	8.57888	11.5072	-2.30255	2	0	0.000117645	1
ENSG00000099326	ENSMUSG00000030380	MZF1	Mzf1	Other	7.5901	5.35857	2.85725	0	0	6.73543e-10	1.00984e-05
ENSG00000099330	ENSMUSG00000002396	OCEL1	Ocel1	Other	5.42767	9.17485	-3.12146	0	1	7.35294e-10	1.10213e-05
ENSG00000099331	ENSMUSG00000004677	MYO9B	Myo9b	Conserved	11.3398	12.1267	-0.161244	4	3	0.401324	1
ENSG00000099337	ENSMUSG00000046410	KCNK6	Kcnk6	Other	8.25495	5.89058	2.99009	0	0	3.7666e-06	0.0513387
ENSG00000099341	ENSMUSG00000030591	PSMD8	Psmd8	Other	9.77522	11.4021	-1.00119	1	0	0.152617	1
ENSG00000099364	ENSMUSG00000030811	FBXL19	Fbxl19	Other	8.19493	7.13449	1.68616	1	0	4.16794e-06	0.0566798
ENSG00000099365	ENSMUSG00000030806	STX1B	Stx1b	Other	4.12214	5.44807	-0.700204	0	0	0.106895	1
ENSG00000099377	ENSMUSG00000042289	HSD3B7	Hsd3b7	Other	4.97044	5.12146	0.4747	0	0	0.801586	1
ENSG00000099385	ENSMUSG00000030814	BCL7C	Bcl7c	Other	7.34399	7.90421	0.065507	3	0	0.306517	1
ENSG00000099399	ENSMUSG00000035427	MAGEB2	Mageb4	Other	-Inf	-Inf	NaN	0	0	0.105684	1
ENSG00000099617	ENSMUSG00000003070	EFNA2	Efna2	Other	-0.752391	2.21095	-2.33762	0	0	0.00149785	1
ENSG00000099622	ENSMUSG00000045193	CIRBP	Cirbp	Other	11.6671	9.99141	2.30144	3	0	2.09752e-07	0.00300176
ENSG00000099624	ENSMUSG00000003072	ATP5F1D	Atp5d	Other	7.90363	11.8285	-3.29915	2	0	4.52575e-07	0.00640259
ENSG00000099625	ENSMUSG00000035640	CBARP	Cbarp	Other	1.56557	8.84056	-6.64926	0	0	4.94839e-10	7.43149e-06
ENSG00000099783	ENSMUSG00000059208	HNRNPM	Hnrnpm	Other	11.4308	12.7877	-0.731154	0	0	0.735658	1
ENSG00000099785	ENSMUSG00000079557	MARCH2	March2	Other	6.9332	10.4506	-2.89164	0	1	1.66221e-08	0.000244178
ENSG00000099795	ENSMUSG00000033938	NDUFB7	Ndufb7	Other	7.73106	10.3446	-1.98784	1	0	0.00257784	1
ENSG00000099797	ENSMUSG00000031708	TECR	Tecr	Other	9.99507	11.6169	-0.996153	1	0	0.0183417	1
ENSG00000099800	ENSMUSG00000020219	TIMM13	Timm13	Other	8.60096	9.19315	0.0335293	0	0	0.601397	1
ENSG00000099810	ENSMUSG00000062937	MTAP	Mtap	Alternative	9.0168	9.73593	-0.0934156	1	4	0.186016	1
ENSG00000099812	ENSMUSG00000035852	MISP	Misp	Other	1.93656	-2.06117	4.62346	0	0	0.0336384	1
ENSG00000099814	ENSMUSG00000072825	CEP170B	Cep170b	Other	6.79278	9.86479	-2.44628	0	1	0.00106972	1
ENSG00000099817	ENSMUSG00000004667	POLR2E	Polr2e	Other	9.44361	9.61615	0.453186	2	0	0.0389173	1
ENSG00000099821	ENSMUSG00000020329	POLRMT	Polrmt	Other	8.80048	9.18162	0.244585	1	0	0.0570204	1
ENSG00000099822	ENSMUSG00000020331	HCN2	Hcn2	Other	3.87201	4.60289	-0.105156	0	0	0.731492	1
ENSG00000099834	ENSMUSG00000025497	CDHR5	Cdhr5	Other	3.75928	-Inf	Inf	0	0	1.40176e-05	0.185215
ENSG00000099840	ENSMUSG00000055862	IZUMO4	Izumo4	Other	5.81425	9.6193	-3.17932	1	0	1.63411e-12	2.50313e-08
ENSG00000099849	ENSMUSG00000038618	RASSF7	Rassf7	Other	6.80131	6.23447	1.19257	2	0	0.0186255	1
ENSG00000099860	ENSMUSG00000015312	GADD45B	Gadd45b	Other	10.2031	10.8245	0.00431797	4	0	0.00739577	1
ENSG00000099864	ENSMUSG00000035863	PALM	Palm	Other	2.84781	8.19737	-4.72383	0	0	1.18476e-05	0.157182
ENSG00000099866	ENSMUSG00000020310	MADCAM1	Madcam1	Other	2.75317	1.90147	1.47741	1	0	0.413038	1
ENSG00000099875	ENSMUSG00000020190	MKNK2	Mknk2	Conserved	10.7159	12.9983	-1.6567	2	3	0.0661418	1
ENSG00000099889	ENSMUSG00000000325	ARVCF	Arvcf	Other	3.53401	5.48505	-1.32531	0	0	0.0013408	1
ENSG00000099899	ENSMUSG00000022721	TRMT2A	Trmt2a	Other	8.78846	10.5061	-1.09195	0	1	0.0147127	1
ENSG00000099901	ENSMUSG00000005732	RANBP1	Ranbp1	Other	11.0158	10.5845	1.05701	1	0	0.00752921	1
ENSG00000099904	ENSMUSG00000060166	ZDHHC8	Zdhhc8	Other	7.92358	9.68024	-1.13094	0	0	0.169724	1
ENSG00000099910	ENSMUSG00000022750	KLHL22	Klhl22	Other	7.91168	8.05919	0.478212	2	0	0.0228853	1
ENSG00000099917	ENSMUSG00000012114	MED15	Med15	Other	10.5125	11.6781	-0.539915	7	0	0.790089	1
ENSG00000099937	ENSMUSG00000022766	SERPIND1	Serpind1	Other	2.68195	3.81589	-0.50822	0	0	0.262971	1
ENSG00000099940	ENSMUSG00000022765	SNAP29	Snap29	Other	8.68395	10.1248	-0.815106	1	0	0.0390442	1
ENSG00000099942	ENSMUSG00000006134	CRKL	Crkl	Other	10.5645	10.9498	0.240434	1	0	0.00117278	1
ENSG00000099949	ENSMUSG00000022761	LZTR1	Lztr1	Conserved	9.43568	10.4085	-0.347083	2	1	0.889909	1
ENSG00000099953	ENSMUSG00000000901	MMP11	Mmp11	Other	2.55033	5.41191	-2.23585	0	0	2.01096e-05	0.262893
ENSG00000099954	ENSMUSG00000071226	CECR2	Cecr2	Other	3.35268	6.16395	-2.18555	0	0	3.37321e-05	0.434267
ENSG00000099956	ENSMUSG00000000902	SMARCB1	Smarcb1	Other	9.22	10.3261	-0.480381	0	0	0.910453	1
ENSG00000099957	ENSMUSG00000022758	P2RX6	P2rx6	Mm-Specific	2.00024	-Inf	Inf	0	1	0.00360232	1
ENSG00000099958	ENSMUSG00000009092	DERL3	Derl3	Other	4.30881	4.12465	0.809885	0	1	0.759687	1
ENSG00000099960	ENSMUSG00000022756	SLC7A4	Slc7a4	Other	1.15172	2.84043	-1.06299	0	0	0.00393591	1
ENSG00000099968	ENSMUSG00000009112	BCL2L13	Bcl2l13	Other	8.93511	10.4043	-0.84346	0	0	0.0215499	1
ENSG00000099985	ENSMUSG00000058755	OSM	Osm	Other	10.1905	9.52557	1.29064	4	0	0.399099	1
ENSG00000099991	ENSMUSG00000020196	CABIN1	Cabin1	Conserved	10.1493	11.6289	-0.853928	3	1	0.628869	1
ENSG00000099992	ENSMUSG00000034412	TBC1D10A	Tbc1d10a	Conserved	8.25792	9.41705	-0.533411	2	4	0.939545	1
ENSG00000099994	ENSMUSG00000006342	SUSD2	Susd2	Other	4.13841	5.85911	-1.09498	0	0	0.158387	1
ENSG00000099995	ENSMUSG00000002129	SF3A1	Sf3a1	Other	10.4502	11.527	-0.45113	0	0	0.85405	1
ENSG00000099998	ENSMUSG00000006344	GGT5	Ggt5	Conserved	4.55354	6.69011	-1.51084	1	2	0.0196276	1
ENSG00000099999	ENSMUSG00000003581	RNF215	Rnf215	Other	6.48536	8.99256	-1.88148	0	0	0.000114026	1
ENSG00000100012	ENSMUSG00000054986	SEC14L3	Sec14l3	Other	3.17403	1.23295	2.56681	0	0	0.0370275	1
ENSG00000100023	ENSMUSG00000022771	PPIL2	Ppil2	Other	9.48022	11.0674	-0.961501	0	0	0.0382738	1
ENSG00000100024	ENSMUSG00000033427	UPB1	Upb1	Other	4.48623	6.26931	-1.15736	0	1	0.00166975	1
ENSG00000100027	ENSMUSG00000022773	YPEL1	Ypel1	Other	6.75356	7.09366	0.285623	3	0	0.860538	1
ENSG00000100028	ENSMUSG00000020180	SNRPD3	Snrpd3	Other	9.95371	9.78762	0.791814	1	1	0.00490396	1
ENSG00000100029	ENSMUSG00000020430	PES1	Pes1	Other	9.60645	10.7438	-0.511652	0	0	0.924924	1
ENSG00000100030	ENSMUSG00000063358	MAPK1	Mapk1	Conserved	10.7302	12.1447	-0.788739	4	1	0.594633	1
ENSG00000100034	ENSMUSG00000026181	PPM1F	Ppm1f	Other	7.97444	9.66648	-1.06632	0	0	0.0182926	1
ENSG00000100036	ENSMUSG00000048807	SLC35E4	Slc35e4	Other	7.00373	5.92821	1.70125	1	0	0.0252096	1
ENSG00000100038	ENSMUSG00000022779	TOP3B	Top3b	Other	8.488	10.4689	-1.35521	1	0	0.00207235	1
ENSG00000100053	ENSMUSG00000029352	CRYBB3	Crybb3	Other	1.75044	2.1085	0.267663	0	0	0.906676	1
ENSG00000100055	ENSMUSG00000018008	CYTH4	Cyth4	Conserved	9.99899	11.5134	-0.888696	6	3	0.184602	1
ENSG00000100056	ENSMUSG00000003527	ESS2	Ess2	Other	8.16338	10.0228	-1.23367	1	0	0.00146603	1
ENSG00000100060	ENSMUSG00000018169	MFNG	Mfng	Conserved	9.89594	10.8779	-0.356263	2	1	0.579227	1
ENSG00000100065	ENSMUSG00000033170	CARD10	Card10	Other	2.78559	3.94603	-0.534721	0	0	0.0438969	1
ENSG00000100075	ENSMUSG00000003528	SLC25A1	Slc25a1	Other	7.81253	9.23018	-0.791932	0	0	0.797354	1
ENSG00000100077	ENSMUSG00000042249	GRK3	Grk3	Other	10.0614	2.35796	8.32913	0	1	1.94344e-07	0.0027834
ENSG00000100078	ENSMUSG00000034579	PLA2G3	Pla2g3	Mm-Specific	-1.0383	2.61328	-3.02585	0	2	0.000108438	1
ENSG00000100079	ENSMUSG00000043501	LGALS2	Lgals2	Other	-0.679239	-1.38548	1.33197	1	0	0.316849	1
ENSG00000100083	ENSMUSG00000033128	GGA1	Gga1	Other	9.0773	10.3245	-0.621516	4	0	0.828555	1
ENSG00000100084	ENSMUSG00000022702	HIRA	Hira	Other	9.26374	9.72413	0.165334	2	0	0.0306579	1
ENSG00000100092	ENSMUSG00000022436	SH3BP1	Sh3bp1	Other	9.23152	11.2677	-1.41047	2	0	0.0199329	1
ENSG00000100095	ENSMUSG00000058153	SEZ6L	Sez6l	Other	0.598081	-0.115235	1.33904	0	0	0.115621	1
ENSG00000100097	ENSMUSG00000068220	LGALS1	Lgals1	Conserved	10.4534	13.5686	-2.4894	2	1	0.213272	1
ENSG00000100099	ENSMUSG00000042328	HPS4	Hps4	Other	9.53336	8.94977	1.20931	0	0	1.52003e-05	0.20034
ENSG00000100100	ENSMUSG00000034614	PIK3IP1	Pik3ip1	Other	11.5559	11.4328	0.748796	2	1	0.818391	1
ENSG00000100104	ENSMUSG00000029346	SRRD	Srrd	Other	8.36763	8.11604	0.87731	1	0	0.000650791	1
ENSG00000100105	ENSMUSG00000020453	PATZ1	Patz1	Other	8.74869	9.89985	-0.525438	2	0	0.259743	1
ENSG00000100106	ENSMUSG00000033088	TRIOBP	Triobp	Other	8.48379	10.1581	-1.04862	0	0	0.0450653	1
ENSG00000100109	ENSMUSG00000029345	TFIP11	Tfip11	Other	9.73687	10.636	-0.273389	0	1	0.124435	1
ENSG00000100122	ENSMUSG00000029343	CRYBB1	Crybb1	Alternative	1.03987	-2.37	4.0356	1	3	0.357091	1
ENSG00000100124	ENSMUSG00000033055	ANKRD54	Ankrd54	Other	7.48241	9.05908	-0.950953	0	0	0.364093	1
ENSG00000100129	ENSMUSG00000033047	EIF3L	Eif3l	Other	11.593	11.6392	0.579536	1	0	2.58013e-06	0.0354742
ENSG00000100138	ENSMUSG00000063480	SNU13	Snu13	Other	10.0094	11.0251	-0.38991	1	0	0.387005	1
ENSG00000100139	ENSMUSG00000033039	MICALL1	Micall1	Conserved	8.04854	11.1722	-2.49797	1	2	1.30135e-06	0.0181265
ENSG00000100142	ENSMUSG00000033020	POLR2F	Polr2f	Other	7.77422	9.07737	-0.677435	0	0	0.22533	1
ENSG00000100146	ENSMUSG00000033006	SOX10	Sox10	Mm-Specific	1.1703	-Inf	Inf	0	1	0.000739273	1
ENSG00000100147	ENSMUSG00000068114	CCDC134	Ccdc134	Other	7.01677	9.55433	-1.91184	1	0	4.13945e-07	0.00586229
ENSG00000100154	ENSMUSG00000033209	TTC28	Ttc28	Other	5.95966	8.06986	-1.48448	1	0	0.149331	1
ENSG00000100156	ENSMUSG00000032988	SLC16A8	Slc16a8	Other	1.65685	3.05195	-0.76938	0	0	0.0829171	1
ENSG00000100162	ENSMUSG00000068101	CENPM	Cenpm	Other	7.67119	7.30175	0.995161	0	0	0.230244	1
ENSG00000100167	ENSMUSG00000022456	SEPT3	Sept3	Other	4.75869	3.70824	1.67617	0	0	0.181756	1
ENSG00000100170	ENSMUSG00000011034	SLC5A1	Slc5a1	Other	1.69696	-3.59323	5.91591	0	0	0.01425	1
ENSG00000100196	ENSMUSG00000010830	KDELR3	Kdelr3	Other	4.88331	3.82744	1.68159	1	0	0.0105962	1
ENSG00000100201	ENSMUSG00000055065	DDX17	Ddx17	Other	13.3986	14.0657	-0.041405	0	0	0.0505949	1
ENSG00000100206	ENSMUSG00000022429	DMC1	Dmc1	Other	6.29776	-4.17668	11.1002	0	0	4.4492e-05	0.567629
ENSG00000100209	ENSMUSG00000043510	HSCB	Hscb	Other	6.21997	9.1998	-2.35411	1	0	1.19726e-05	0.158792
ENSG00000100211	ENSMUSG00000022428	CBY1	Cby1	Other	5.70568	7.03791	-0.706508	0	0	0.0104728	1
ENSG00000100216	ENSMUSG00000022427	TOMM22	Tomm22	Conserved	9.98895	11.0357	-0.421016	1	1	0.792827	1
ENSG00000100218	ENSMUSG00000009070	RSPH14	Rsph14	Other	0.835555	-1.49106	2.95234	1	0	0.446367	1
ENSG00000100219	ENSMUSG00000020484	XBP1	Xbp1	Conserved	11.2647	10.9218	0.968695	4	2	4.32926e-06	0.0588173
ENSG00000100220	ENSMUSG00000001783	RTCB	Rtcb	Other	9.86871	11.6384	-1.14395	0	0	0.0136316	1
ENSG00000100221	ENSMUSG00000022426	JOSD1	Josd1	Other	10.8945	9.4691	2.05115	1	0	7.98634e-09	0.000118078
ENSG00000100225	ENSMUSG00000001786	FBXO7	Fbxo7	Other	10.6158	9.17942	2.06205	1	0	5.29096e-07	0.00747136
ENSG00000100226	ENSMUSG00000042535	GTPBP1	Gtpbp1	Other	10.3792	11.5242	-0.519284	0	0	0.746047	1
ENSG00000100227	ENSMUSG00000041815	POLDIP3	Poldip3	Other	9.82125	11.8761	-1.42909	2	0	0.0293955	1
ENSG00000100234	ENSMUSG00000020044	TIMP3	Timp3	Other	-1.08554	4.45274	-4.91256	0	0	0.000379542	1
ENSG00000100239	ENSMUSG00000036561	PPP6R2	Ppp6r2	Other	9.90582	10.1206	0.410971	0	0	0.00654424	1
ENSG00000100241	ENSMUSG00000036529	SBF1	Sbf1	Conserved	11.7512	12.22	0.156889	2	1	0.0788879	1
ENSG00000100242	ENSMUSG00000042524	SUN2	Sun2	Other	11.9887	13.2371	-0.622664	2	0	0.941314	1
ENSG00000100243	ENSMUSG00000018042	CYB5R3	Cyb5r3	Other	8.85544	9.54239	-0.0612273	0	1	0.83522	1
ENSG00000100246	ENSMUSG00000022420	DNAL4	Dnal4	Other	5.47003	7.48666	-1.39091	0	0	0.00179839	1
ENSG00000100253	ENSMUSG00000022613	MIOX	Miox	Other	2.82037	-Inf	Inf	0	0	2.66054e-06	0.0365318
ENSG00000100258	ENSMUSG00000022614	LMF2	Lmf2	Other	9.55003	10.51	-0.334228	0	0	0.952643	1
ENSG00000100263	ENSMUSG00000034175	RHBDD3	Rhbdd3	Other	7.26618	6.31589	1.57601	0	1	4.20899e-05	0.538119
ENSG00000100266	ENSMUSG00000016664	PACSIN2	Pacsin2	Alternative	8.61831	10.0286	-0.784565	4	3	0.0810434	1
ENSG00000100271	ENSMUSG00000022442	TTLL1	Ttll1	Other	4.75898	7.39837	-2.01367	1	1	2.5677e-06	0.035311
ENSG00000100276	ENSMUSG00000034209	RASL10A	Rasl10a	Other	2.26258	-0.94051	3.82882	0	0	0.00013179	1
ENSG00000100280	ENSMUSG00000009090	AP1B1	Ap1b1	Other	10.1491	11.2842	-0.509382	2	1	0.672834	1
ENSG00000100281	ENSMUSG00000034518	HMGXB4	Hmgxb4	Other	8.92734	9.43438	0.118682	2	0	0.0513408	1
ENSG00000100284	ENSMUSG00000042870	TOM1	Tom1	Other	9.00614	8.96294	0.668923	1	0	0.210934	1
ENSG00000100285	ENSMUSG00000020396	NEFH	Nefh	Other	5.1531	7.73163	-1.95281	0	0	2.04777e-06	0.0282797
ENSG00000100290	ENSMUSG00000016758	BIK	Bik	Other	3.57333	4.86146	-0.66241	0	0	0.0953591	1
ENSG00000100292	ENSMUSG00000005413	HMOX1	Hmox1	Other	4.45277	7.18767	-2.10918	0	0	0.224394	1
ENSG00000100294	ENSMUSG00000048755	MCAT	Mcat	Other	6.40829	7.64977	-0.615756	0	0	0.0924497	1
ENSG00000100296	ENSMUSG00000034274	THOC5	Thoc5	Other	8.92227	9.4115	0.136492	1	0	0.0114461	1
ENSG00000100297	ENSMUSG00000005410	MCM5	Mcm5	Other	10.3938	10.6986	0.320896	0	0	0.0723339	1
[truncated: 13,469 more rows]
